# Supplementary material for: Aerobic oxidative alkynylation of H-phosphonates and amides: an efficient route for the synthesis of alkynylphosphonates and ynamides using a recyclable Cu–MnO catalyst
Source: Royal Society of Chemistry journal article supplement (doi:10.1039/c9cy00275h), 2019-01-01
Supplement: c9cy00275h1.pdf [file c9cy00275h1.pdf]

## Electronic Supporting Information (ESI)

### **Aerobic Oxidative Alkynylation of H-Phosphonates and Amides: An Efficient Route for the Synthesis of Alkynylphosphonates and Ynamides by Recyclable Cu-MnO Catalyst**

Harshvardhan Singh, Tapan Sahoo, Chiranjit Sen, Sunil M. Galani, and Subhash Chandra Ghosh\*

Natural Products and Green Chemistry Division

Academy of Scientific and Innovative Research

CSIR-Central Salt and Marine Chemicals Research Institute

G.B. Marg, Bhavnagar-364002, Gujarat (India)

*Fax: (+91) 278-2567562, Tel: +(91)278-2567760 ext. 7210*

E-mail: [scghosh@csmcri.res.in](mailto:scghosh@csmcri.res.in)

## Contents

|                                                                 |          |
|-----------------------------------------------------------------|----------|
| 1. General methods and materials                                | S3       |
| 2. Synthesis of spherical Cu-MnO catalyst                       | S4       |
| 3. Typical procedure for preparation of alkynylphosphonates (I) | S4       |
| 4. Typical procedure for preparation of ynamides (II)           | S5-S6    |
| 5. Spectral characterization                                    | S7-S-30  |
| 6. $^1\text{H}$ , $^{13}\text{C}$ , & $^{31}\text{P}$ Spectra   | S31-S118 |
| 7. EDS-SEM analysis and SEM of reused catalyst                  | S119     |
| 8. References                                                   | S120     |

## 1. General Methods and materials

All reactions were carried out in oven-dried glassware under standard reaction conditions. All substrates of acetylene, amide and phosphate were purchased from commercial source like S. D. Fine chemicals Ltd India and TCI Chemicals (India) Pvt. Ltd and used without further purification. All the solvents were purchased from S. D. Fine chemicals Ltd India and TCI Chemicals (India) Pvt. Ltd. and dried through standard procedure and stored under nitrogen. Analytical thin layer chromatography (TLC) was performed on pre-coated silica gel 60 F<sub>254</sub> plates. Visualization on TLC was achieved by UV light (254 nm). Flash column chromatography purification of compounds was carried out by gradient elution using ethyl acetate (EA) in light petroleum ether (PE) or Hexane unless otherwise stated. <sup>1</sup>H, <sup>13</sup>C & <sup>31</sup>P NMR was recorded on 600/150/243MHz. NMR spectrometer, in CDCl<sub>3</sub> unless otherwise stated, using either TMS or the undeuterated solvent residual signal as the reference. The following abbreviations were used to describe peak splitting patterns when appropriate: br = broad, s = singlet, d = doublet, t = triplet, m = multiplet, dd = doublet of doublet, td = triplet of doublet. Coupling constants, *J*, were reported in hertz unit (Hz). Mass spectral data were obtained from ADCIF division of our Institution by using electro spray ionization time-of-flight (ESI-TOF) mode on mass spectrometer.

### List of Abbreviation

|                      |                                   |
|----------------------|-----------------------------------|
| Calcd                | Calculated                        |
| MnO                  | Manganous oxide                   |
| Cu(OAc) <sub>2</sub> | Copper acetate                    |
| DMSO                 | Dimethyl sulfoxide                |
| DMF                  | Dimethylformamide                 |
| CH <sub>3</sub> CN   | Acetonitrile                      |
| THF                  | Tetrahydrofuran                   |
| equiv                | Equivalent                        |
| HRMS                 | High resolution mass spectrometry |
| Hz                   | Hertz                             |
| <i>J</i>             | Coupling constant                 |
| TMS-Cl               | Trimethylsilyl chloride           |

## 2. Synthesis of spherical Cu-MnO catalysts

### Synthesis of spherical MnO<sub>2</sub>:

Spherical MnO<sub>2</sub> synthesized according to our previous reported method.<sup>1,2</sup>

**Typical synthetic procedure:** In a typical synthetic procedure, manganese acetate (2g,  $1.01 \times 10^{-2}$  mol) and oxalic acid (2g,  $1.04 \times 10^{-2}$  mol) was dissolved in deionised water to make the clear solution in stirring condition. Then an aqueous solution of ammonium carbonate (4g, 0.025 mol) was added dropwise to a pre-mixed solution to make the total volume 40 mL. After stirring, the resulting clear solution was transferred to 60 ml Teflon-lined stainless steel autoclave, sealed tightly, and heated at 150°C for 15h. After that, the autoclave was allowed to cool down and the resultant precipitates washed with deionised water and ethanol by centrifugation and dried at 70°C for an hour. Finally, the dried powder was calcined at 350°C for 6h under air atmosphere.

### Synthesis of Cu-MnO catalysts:

Impregnation method has been used for the preparation of Cu impregnated MnO (Cu-MnO) by using Cu(OAc)<sub>2</sub>·H<sub>2</sub>O and MnO<sub>2</sub> followed by calcination under 5% H<sub>2</sub> and 95% N<sub>2</sub> condition.

**Synthetic procedure:** In stirring condition, 500 mg of MnO<sub>2</sub> and 67.5 mg (5 wt% with respect to MnO<sub>2</sub>) Copper Acetate [Cu(OAc)<sub>2</sub>·H<sub>2</sub>O] were added in methanol solution followed by sonication. The resultant slurry was evaporated to dryness with continuous stirring (500 rpm) at 70°C under atmospheric pressure. The resultant dried powder was calcined at 350°C for 6 h under 5% H<sub>2</sub> and 95% N<sub>2</sub>.

## 3. Typical procedure for preparation of alkynylphosphonates (I)

In a carousel reaction tube Cu-MnO catalyst (12 mg) was taken, terminal alkyne (0.25 mmol), dialkyl phosphate (0.5 mmol) and 1 mL DMSO were added over it. The reaction mixture was stirred at 100 °C for 1.5h under air atmosphere. After completion of the reaction, the crude reaction mixture was filtered and washed with ethyl acetate (25 mL). The organic layer was washed with water, and then water layer was re-extracted with ethyl acetate (2x 25 mL). The combined organic layer was washed with brine solution, dried over Na<sub>2</sub>SO<sub>4</sub>, and then concentrated under reduced pressure. The resulting residue was



purified by flash chromatography (ethyl acetate: hexane) to afford the desired alkynylphosphonates.

#### **4. Typical procedure for preparation of ynamides (II)**

In a carousel reaction tube Cu-MnO catalyst (12 mg) and Na<sub>2</sub>CO<sub>3</sub> (53 mg, 0.5 mmol) were taken, the tube was then evacuated and refill with oxygen for three times. Next, the terminal alkyne (0.25 mmol), oxazolidin-2-one (0.5 mmol) and 1 mL Toluene were added over it via syringe. The reaction mixture was stirred at 100 °C for 2h under oxygen atmosphere. After completion of the reaction, the crude reaction mixture was filtered and washed with ethyl acetate (25 mL). The organic layer was washed with water and brine solution, dried over Na<sub>2</sub>SO<sub>4</sub>, and then concentrated under reduced pressure. The resulting residue was purified by flash chromatography (ethyl acetate: hexane) to afford the desired ynamides.

Table S1: Solvent screening for ynamide synthesis

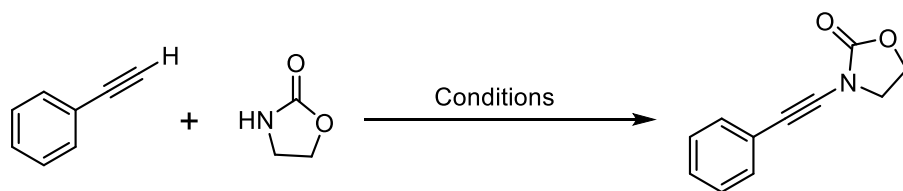

| Entry | Catalyst     | Solvent          | Base                            | T (°C) | Yield (%) |
|-------|--------------|------------------|---------------------------------|--------|-----------|
| 1     | 5 wt% Cu-MnO | toluene          | Na <sub>2</sub> CO <sub>3</sub> | 100    | 98        |
| 2     | 5 wt% Cu-MnO | THF              | Na <sub>2</sub> CO <sub>3</sub> | 100    | trace     |
| 3     | 5 wt% Cu-MnO | DMSO             | NaHCO <sub>3</sub>              | 100    | trace     |
| 4     | 5 wt% Cu-MnO | Ph-Cl            | Na <sub>2</sub> CO <sub>3</sub> | 100    | 92        |
| 5     | 5 wt% Cu-MnO | O-xylene         | Na <sub>2</sub> CO <sub>3</sub> | 100    | 97        |
| 6     | 5 wt% Cu-MnO | H <sub>2</sub> O | Na <sub>2</sub> CO <sub>3</sub> | 100    | NR        |
| 7     | 5 wt% Cu-MnO | MeOH             | Na <sub>2</sub> CO <sub>3</sub> | 100    | NR        |

Standard reaction conditions: 0.25 mmol phenyl acetylene, 2-Oxazolidone (2 equiv., 0.5 mmol), solvent 1 ml, catalyst 12 mg, 100°C, under O<sub>2</sub> atm., for 2h

## 5. Spectral characterization:

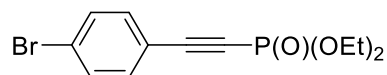

**Diethyl (4-bromophenyl)ethynylphosphonate (3a):**<sup>3</sup> Prepared according to typical procedure I. The crude product was purified by flash chromatography (EtOAc/hexanes 1:2) to afford 3a product as a yellow oil, (74 mg, 94%). **<sup>1</sup>H NMR** (600 MHz, CDCl<sub>3</sub>) δ 7.52 (d, *J* = 8.0 Hz, 2H), 7.42 (d, *J* = 8.7 Hz, 2H), 4.27 – 4.18 (m, 4H), 1.41 (t, *J* = 7.1 Hz, 6H); **<sup>13</sup>C NMR** (151 MHz, CDCl<sub>3</sub>) δ 134.08 (d, *J* = 1.8 Hz), 132.1, 125.6, 118.6 (d, *J* = 6.2 Hz), 97.8 (d, *J* = 52.6 Hz), 79.8 (d, *J* = 298.6 Hz), 63.49 (d, *J* = 5.5 Hz), 16.3 (d, *J* = 7.0 Hz); **<sup>31</sup>P NMR** (243 MHz, CDCl<sub>3</sub>) δ -5.77; **IR** (neat): 3437, 2931, 2194, 1483, 1262, 1021, 977, 862, 684; **HRMS** (ESI+) calcd for C<sub>12</sub>H<sub>14</sub>BrO<sub>3</sub>P [M+H]<sup>+</sup> : 316.9942, found: 316.9951.

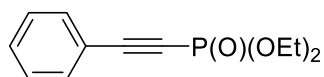

**Diethyl (phenylethynyl)phosphonate (3b):**<sup>4</sup> Prepared according to typical procedure I. The crude product was purified by flash chromatography (EtOAc/hexanes 1:2) to afford 3b product as a yellow oil, (56 mg, 93%). **<sup>1</sup>H NMR** (600 MHz, CDCl<sub>3</sub>) δ 7.55 (d, *J* = 7.4 Hz, 2H), 7.44 (t, *J* = 7.4 Hz, 1H), 7.36 (t, *J* = 7.7 Hz, 2H), 4.24-4.19 (m, 4H), 1.39 (t, *J* = 7.2 Hz, 6H); **<sup>13</sup>C NMR** (151 MHz, CDCl<sub>3</sub>) δ 132.7, 130.8, 128.6, 119.6 (d, *J* = 5.5 Hz), 99.1 (d, *J* = 53.0 Hz), 78.5 (d, *J* = 300.3 Hz), 63.3 (d, *J* = 5.2 Hz), 16.2 (d, *J* = 7.1 Hz); **<sup>31</sup>P NMR** (243 MHz, CDCl<sub>3</sub>) δ -5.48; **IR** (neat): 3482, 2985, 2194, 1439 1270, 1021, 977, 862, 764, 692; **HRMS** (ESI+) calcd for C<sub>12</sub>H<sub>15</sub>O<sub>3</sub>P [M+H]<sup>+</sup> : 239.0837, found: 239.0835.

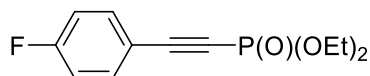

**Diethyl [(4-fluorophenyl)ethynyl]phosphonate (3c):**<sup>3</sup> Prepared according to typical procedure I. The crude product was purified by flash chromatography (EtOAc/hexanes 1:2) to afford 3c product as a yellow oil, (65 mg, 94%). **<sup>1</sup>H NMR** (600 MHz, CDCl<sub>3</sub>) δ 7.57 (dd, *J* = 8.4, 5.4 Hz, 2H), 7.11 – 7.05 (m, 2H), 4.28 – 4.19 (m, 4H), 1.41 (t, *J* = 7.0 Hz, 6H); **<sup>13</sup>C NMR** (151 MHz, CDCl<sub>3</sub>) δ 163.9 (d, *J*<sub>C-F</sub> = 253.8 Hz), 136.1 (m, *J*<sub>C-F</sub> = 8.5 Hz), 116.2 (d, *J*<sub>C-F</sub> = 22.1 Hz), 115.8 (d, *J*<sub>C-P</sub> = 4.5 Hz), 98.0 (d, *J*<sub>C-P</sub> = 53.3 Hz), 78.4 (d, *J*<sub>C-P</sub> = 300.5 Hz), 63.4 (d, *J*<sub>C-P</sub> = 5.5 Hz), 16.2 (d, *J*<sub>C-P</sub> = 7.0 Hz); **<sup>31</sup>P NMR** (243 MHz, CDCl<sub>3</sub>) δ -5.52; **IR** (neat): 3435, 2929, 2190, 1506, 1264, 1025, 801; **HRMS** (ESI+) calcd for C<sub>12</sub>H<sub>14</sub>FO<sub>3</sub>P [M+Na]<sup>+</sup> : 279.0562, found: 279.0569.

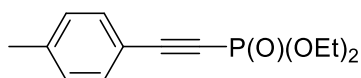

**Diethyl (4-tolyethynyl)phosphonate (3d):**<sup>4</sup> Prepared according to typical procedure I. The crude product was purified by flash chromatography (EtOAc/hexanes 1:2) to afford 3d product as a pale yellow oil, (61 mg, 97%). <sup>1</sup>H NMR (600 MHz, CDCl<sub>3</sub>) δ 7.43 (d, *J* = 8.0 Hz, 2H), 7.16 (d, *J* = 7.9 Hz, 2H), 4.20 (m, 4H), 2.36 (s, 3H), 1.38 (t, *J* = 7.0 Hz, 6H); <sup>13</sup>C NMR (151 MHz, CDCl<sub>3</sub>) δ 141.4, 132.7 (d, *J* = 2.0 Hz), 129.4, 116.5 (d, *J* = 5.7 Hz), 99.7 (d, *J* = 53.4 Hz), 77.8 (d, *J* = 300.5 Hz), 63.3 (d, *J* = 5.6 Hz), 21.8, 16.2 (d, *J* = 7.0 Hz); <sup>31</sup>P NMR (243 MHz, CDCl<sub>3</sub>) δ -5.06; IR (neat): 3481, 2994, 2189, 1514, 1262, 1028, 981, 866, 817, 786, 610; HRMS (ESI+) calcd for C<sub>13</sub>H<sub>17</sub>O<sub>3</sub>P [M+Na]<sup>+</sup>: 275.0813, found: 275.0809.

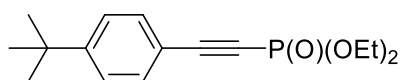

**Diethyl [(4-*tert*-butylphenyl)ethynyl]phosphonate (3e):**<sup>3</sup> Prepared according to typical procedure I. The crude product was purified by flash chromatography (EtOAc/hexanes 1:2) to afford 3e product as a yellow oil, (70 mg, 95%). <sup>1</sup>H NMR (600 MHz, CDCl<sub>3</sub>) δ 7.50 (d, *J* = 7.9 Hz, 2H), 7.39 (d, *J* = 8.3 Hz, 2H), 4.27 – 4.19 (m, 4H), 1.41 (t, *J* = 7.1 Hz, 6H), 1.32 (s, 9H); <sup>13</sup>C NMR (151 MHz, CDCl<sub>3</sub>) δ 154.5, 132.6, 125.7, 116.6 (d, *J* = 5.5 Hz), 99.7 (d, *J* = 53.4 Hz), 77.8 (d, *J* = 300.88 Hz), 63.3 (d, *J* = 5.0 Hz), 35.2, 31.2, 16.26 (d, *J* = 7.0 Hz); <sup>31</sup>P NMR (243 MHz, CDCl<sub>3</sub>) δ -5.03; IR (neat): 3476, 2962, 2186, 1265, 1023, 976, 867, 836, 763, 569; HRMS (ESI+) calcd for C<sub>16</sub>H<sub>23</sub>O<sub>3</sub>P [M+H]<sup>+</sup>: 295.1483, found: 295.1489.

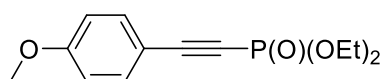

**Diethyl [(4-methoxyphenyl)ethynyl]phosphonate (3f):**<sup>4</sup> Prepared according to typical procedure I. The crude product was purified by flash chromatography (EtOAc/hexanes 1:2) to afford 3f product as a yellow oil, (52 mg, 78%). <sup>1</sup>H NMR (600 MHz, CDCl<sub>3</sub>) δ 7.49 (d, *J* = 8.6 Hz, 2H), 6.86 (d, *J* = 8.9 Hz, 2H), 4.24 – 4.17 (m, 4H), 3.82 (s, 3H), 1.38 (t, *J* = 7.2 Hz, 6H); <sup>13</sup>C NMR (151 MHz, CDCl<sub>3</sub>) δ 161.5, 134.5, 114.3, 111.5 (d, *J* = 5.8 Hz), 99.8 (d, *J* = 53.7 Hz), 77.3 (d, *J* = 303.01 Hz), 63.2 (d, *J* = 5.6 Hz), 55.5, 16.21 (d, *J* = 7.0 Hz); <sup>31</sup>P NMR (243 MHz, CDCl<sub>3</sub>) δ -5.47; IR (neat): 3471, 2985, 2189, 1604, 1511, 1262, 1028, 981, 859, 793, 616.

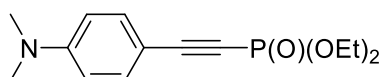

**Diethyl [(4-N, N dimethylaminophenyl)ethynyl]phosphonate (3g):**<sup>4</sup> Prepared according to typical procedure I. The crude product was purified by flash chromatography (EtOAc/hexanes 1:2) to afford 3g product as a maroon oil, (58 mg, 83%). <sup>1</sup>H NMR (600 MHz, CDCl<sub>3</sub>) δ 7.40 (d, *J* = 8.9 Hz, 2H), 6.59 (d, *J* = 9.0 Hz, 2H), 4.24 – 4.14 (m, 4H), 2.99 (s, 6H), 1.37 (t, *J* = 7.0 Hz, 6H); <sup>13</sup>C NMR (151 MHz, CDCl<sub>3</sub>) δ 151.6, 134.2, 111.5, 105.3 (d, *J* = 6.0 Hz), 102.3 (d, *J* = 54.5 Hz), 76.4 (d, *J* = 310.6 Hz), 63.1 (d, *J* = 5.2 Hz), 40.1, 16.3 (d, *J* = 7.1 Hz); <sup>31</sup>P NMR (243 MHz, CDCl<sub>3</sub>) δ -3.86; IR (neat): 3478, 2984, 2930, 2171, 1605, 1529, 1368, 1266, 1021, 974, 864, 766, 599; HRMS (ESI+) calcd for C<sub>12</sub>H<sub>20</sub>NO<sub>3</sub>P [M+H]<sup>+</sup> : 282.1268, found: 282.1263.

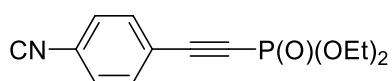

**Diethyl [(4-Cyanophenyl)ethynyl]phosphonate (3h):**<sup>5</sup> Prepared according to typical procedure I. The crude product was purified by flash chromatography (EtOAc/hexanes 1:2) to afford 3h product as a yellow oil, (58 mg, 88%). <sup>1</sup>H NMR (600 MHz, CDCl<sub>3</sub>) δ 7.69-7.66 (m, 4H), 4.27-4.22 (m, 4H), 1.42 (t, *J* = 7.0 Hz, 6H); <sup>13</sup>C NMR (151 MHz, CDCl<sub>3</sub>) δ 133.16 (d, *J* = 1.8 Hz), 132.31, 124.40 (d, *J* = 5.5 Hz), 117.84, 114.20, 95.98 (d, *J* = 51.4 Hz),, 82.56 (d, *J* = 295.3 Hz), 63.64 (d, *J* = 5.2 Hz), 16.22 (d, *J* = 6.9 Hz); <sup>31</sup>P NMR (243 MHz, CDCl<sub>3</sub>) δ -6.63; IR (neat): 3435, 2929, 2191, 1261, 1026, 860, 561; HRMS (ESI+) calcd for C<sub>13</sub>H<sub>14</sub>NO<sub>3</sub>P [M+H]<sup>+</sup> : 264.0789, found: 264.0783.

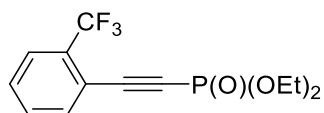

**Diethyl [(2-trifluoromethylbenzene)ethynyl]phosphonate (3i):**<sup>6</sup> Prepared according to typical procedure I. The crude product was purified by flash chromatography (EtOAc/hexanes 1:2) to afford 3i product as a yellow oil, (66 mg, 87%). <sup>1</sup>H NMR (600 MHz, CDCl<sub>3</sub>) δ 7.73 (dd, *J* = 14.4, 7.1 Hz, 2H), 7.61 – 7.53 (m, 2H), 4.29 – 4.19 (m, 4H), 1.41 (t, *J* = 7.0 Hz, 6H). <sup>13</sup>C NMR (151 MHz, CDCl<sub>3</sub>) δ 135.2, 131.9, 130.6, 126.3 (q, *J*<sub>C-F</sub> = 4.7 Hz), 125.0 (q, *J*<sub>C-F</sub> = 274.5 Hz), 117.9, 94.2 (d, *J*<sub>C-P</sub> = 51.8 Hz), 84.0 (d, *J*<sub>C-P</sub> = 292.5 Hz), 63.7 (d, *J*<sub>C-P</sub> = 5.4 Hz), 16.2 (d, *J*<sub>C-P</sub> = 7.1 Hz); <sup>31</sup>P NMR (243 MHz, CDCl<sub>3</sub>) δ -6.46; IR (neat): 3432, 2928, 2193, 1321, 1267, 1135, 1026, 865, 775, 665.

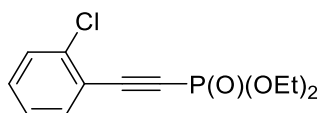

**Diethyl [(2-chlorophenyl)ethynyl]phosphonate (3j):** Prepared according to typical procedure I. The crude product was purified by flash chromatography (EtOAc/hexanes 1:2) to afford 3j product as a yellow oil, (64 mg, 94%). <sup>1</sup>H NMR (600 MHz, CDCl<sub>3</sub>) δ 7.60 (d, *J* = 8.1 Hz, 1H), 7.44 (d, *J* = 8.0 Hz, 1H), 7.40-7.37 (m, 1H), 7.30 – 7.27 (m, 1H), 4.26 (m, 4H), 1.42 (t, *J* = 7.2 Hz, 6H). <sup>13</sup>C NMR (151 MHz, CDCl<sub>3</sub>) δ 137.1, 134.5, 131.7, 129.7, 126.8, 120.1 (d, *J* = 5.9 Hz), 95.2 (d, *J* = 52.2 Hz), 83.4 (d, *J* = 295.0 Hz), 63.6 (d, *J* = 5.4 Hz), 16.2 (d, *J* = 7.0 Hz); <sup>31</sup>P NMR (243 MHz, CDCl<sub>3</sub>) δ -6.10; IR (neat): 3435, 2985, 2192, 1264, 1026, 978, 862, 760; HRMS (ESI+) calcd for C<sub>12</sub>H<sub>14</sub>ClO<sub>3</sub>P [M+Na]<sup>+</sup> : 295.0267, found: 295.0259.

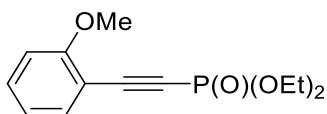

**Diethyl [(2-methoxyphenyl)ethynyl]phosphonate (3k):**<sup>7</sup> Prepared according to typical procedure I. The crude product was purified by flash chromatography (EtOAc/hexanes 1:2) to afford 3k product as a yellow oil, (54 mg, 81%). <sup>1</sup>H NMR (600 MHz, CDCl<sub>3</sub>) δ 7.50 – 7.46 (m, 1H), 7.40-7.37 (m, 1H), 6.92 (t, *J* = 7.5 Hz, 1H), 6.88 (d, *J* = 8.4 Hz, 1H), 4.22 (m, 4H), 3.86 (s, 3H), 1.39 (t, *J* = 7.0 Hz, 6H); <sup>13</sup>C NMR (151 MHz, CDCl<sub>3</sub>) δ 161.7, 134.6 (d, *J* = 2.2 Hz), 132.4, 120.6, 110.9, 109.1 (d, *J* = 5.1 Hz), 96.5 (d, *J* = 53.4 Hz), 82.2 (d, *J* = 300.4 Hz), 63.3 (d, *J* = 5.4 Hz), 55.9 (s), 16.2 (d, *J* = 6.9 Hz); <sup>31</sup>P NMR (243 MHz, CDCl<sub>3</sub>) δ -5.03; IR (neat): 3466, 2930, 2184, 1260, 1025, 976, 868, 784, 755.

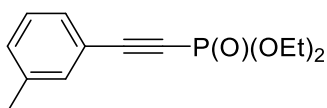

**Diethyl [(3-methylphenyl)ethynyl]phosphonate (3l):**<sup>4</sup> Prepared according to typical procedure I. The crude product was purified by flash chromatography (EtOAc/hexanes 1:2) to afford 3l product as a yellow oil, (59 mg, 94%). <sup>1</sup>H NMR (600 MHz, CDCl<sub>3</sub>) δ 7.36 (s, 1H), 7.35 (m, 1H), 7.24 (m, 2H), 4.27 – 4.14 (m, 4H), 2.33 (s, 3H), 1.39 (t, *J* = 7.2 Hz, 6H); <sup>13</sup>C NMR (151 MHz, CDCl<sub>3</sub>) δ 138.5, 133.2, 131.7, 129.8, 128.5, 119.4 (d, *J* = 5.4 Hz), 99.5 (d, *J* = 52.9 Hz), 78.05 (d, *J* = 299.03 Hz), 63.3 (d, *J* = 5.6 Hz), 21.2, 16.2 (d, *J* = 7.1 Hz); <sup>31</sup>P NMR (243 MHz, CDCl<sub>3</sub>) δ -5.26; IR (neat): 3483, 2983, 2178, 1260, 1025, 976, 793, 654; HRMS (ESI+) calcd for C<sub>13</sub>H<sub>17</sub>O<sub>3</sub>P [M+H]<sup>+</sup> : 253.1003, found: 253.0989.

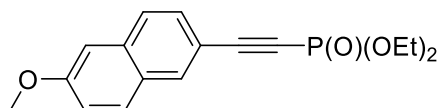

**Diethyl [(6-methoxynaphthalen-2-yl)ethynyl]phosphonate (3m):**<sup>8</sup> Prepared according to typical procedure I. The crude product was purified by flash chromatography (EtOAc/hexanes 1:2) to afford 3m product as a colorless oil, (49 mg, 62%). **<sup>1</sup>H NMR** (600 MHz, CDCl<sub>3</sub>) δ 8.03 (s, 1H), 7.73 – 7.66 (m, 2H), 7.50 (d, *J* = 7.8 Hz, 1H), 7.18 (dd, *J* = 9.0, 2.3 Hz, 1H), 7.11 (m, 1H), 4.24 (m, 4H), 3.92 (s, 3H), 1.41 (t, *J* = 7.0 Hz, 6H); **<sup>13</sup>C NMR** (151 MHz, CDCl<sub>3</sub>) δ 159.4, 135.5, 133.7, 129.8, 128.7, 128.1, 127.2, 120.10, 114.2 (d, *J* = 5.6 Hz), 105.9, 100.1 (d, *J* = 52.7 Hz), 77.9 (d, *J* = 300.9 Hz), 63.3 (d, *J* = 5.2 Hz), 55.5, 16.3 (d, *J* = 7.1 Hz); **<sup>31</sup>P NMR** (243 MHz, CDCl<sub>3</sub>) δ -5.00; **IR** (neat): 3469, 2930, 2181, 1625, 1482, 1390, 1260, 1167, 1024, 973, 782; **HRMS** (ESI+) calcd for C<sub>17</sub>H<sub>19</sub>O<sub>4</sub>P [M+Na]<sup>+</sup> : 341.0919, found: 341.0917.

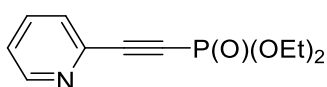

**Diethyl (pyridine-2-ylethynyl)phosphonate (3n):** Prepared according to typical procedure I. The crude product was purified by flash chromatography (EtOAc/hexanes 1:1.5) to afford 3n product as a Yellow oil, (22 mg, 38%). **<sup>1</sup>H NMR** (600 MHz, CDCl<sub>3</sub>) δ 8.66 (m, 1H), 7.74 (t, *J* = 8.0 Hz, 1H), 7.61 (d, *J* = 7.8 Hz, 1H), 7.37 (dd, *J* = 7.0, 5.5 Hz, 1H), 4.26 (m, 4H), 1.41 (t, *J* = 7.2 Hz, 6H); **<sup>13</sup>C NMR** (151 MHz, CDCl<sub>3</sub>) δ 150.5, 136.5, 128.7, 124.9, 96.8 (d, *J* = 50.7 Hz), 77.8 (d, *J* = 291.6 Hz), 63.7 (d, *J* = 5.6 Hz), 16.2 (d, *J* = 7.1 Hz). **<sup>31</sup>P NMR** (243 MHz, CDCl<sub>3</sub>) δ -6.58; **IR** (neat): 3436, 2929, 2197, 1462, 1262, 1023, 870, 781; **HRMS** (ESI+) calcd for C<sub>11</sub>H<sub>14</sub>NO<sub>3</sub>P [M+Na]<sup>+</sup> : 262.0609, found: 262.0618.

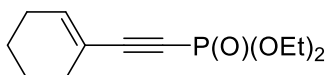

**Diethyl (cyclohexen-1-ylethynyl)phosphonate (3o):**<sup>4</sup> Prepared according to typical procedure I. The crude product was purified by flash chromatography (EtOAc/hexanes 1:2) to afford 3o product as a pale yellow oil, (54 mg, 89%). **<sup>1</sup>H NMR** (600 MHz, CDCl<sub>3</sub>) δ 6.44 (s, 1H), 4.19 – 4.12 (m, 4H), 2.16-2.14 (m, 4H), 1.66 – 1.59 (m, 4H), 1.37 (t, *J* = 7.3 Hz, 6H); **<sup>13</sup>C NMR** (151 MHz, CDCl<sub>3</sub>) δ 142.0, 118.5 (d, *J* = 5.7 Hz), 101.5 (d, *J* = 52.4 Hz), 75.6 (d, *J* = 302.4 Hz), 63.1 (d, *J* = 5.5 Hz), 28.0, 25.9, 21.9, 21.1, 16.2 (d, *J* = 6.9 Hz); **<sup>31</sup>P NMR** (243 MHz, CDCl<sub>3</sub>) δ -4.58; **IR** (neat): 3433, 2928, 2176, 1262, 1025, 971, 807.

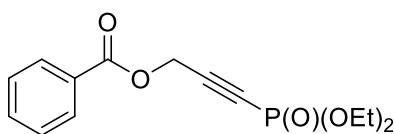

**3-(diethoxyphosphoryl)prop-2-yn-1-yl benzoate (3p):** Prepared according to typical procedure I. The crude product was purified by flash chromatography (EtOAc/hexanes 1:2) to afford 3p product as a colorless oil, (67 mg, 91%).  $^1\text{H NMR}$  (600 MHz,  $\text{CDCl}_3$ )  $\delta$  8.03 (d,  $J = 7.8$  Hz, 2H), 7.58 (t,  $J = 7.4$  Hz, 1H), 7.45 (t,  $J = 7.8$  Hz, 2H), 5.00 (d,  $J = 4.1$  Hz, 2H), 4.24 – 4.09 (m, 4H), 1.35 (t,  $J = 7.2$  Hz, 6H);  $^{13}\text{C NMR}$  (151 MHz,  $\text{CDCl}_3$ )  $\delta$  165.5, 133.7, 129.9, 128.9, 128.6, 93.9 (d,  $J = 50.9$  Hz), 76.8 (d,  $J = 293.4$  Hz), 63.6 (d,  $J = 5.6$  Hz), 52.0 (d,  $J = 4.3$  Hz), 16.1 (d,  $J = 7.0$  Hz);  $^{31}\text{P NMR}$  (243 MHz,  $\text{CDCl}_3$ )  $\delta$  -7.30; **IR** (neat): 3436, 2984, 2930, 2218, 1730, 1602, 1453, 1265, 1166, 1102, 1030, 806, 715, 648; **HRMS** (ESI+) calcd for  $\text{C}_{14}\text{H}_{17}\text{O}_5\text{P}$   $[\text{M}+\text{H}]^+$  : 297.0892, found: 297.0884.

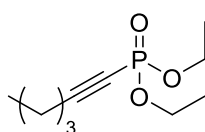

**Diethyl hex-1-yn-1-ylphosphonate (3r):** Prepared according to typical procedure I. The crude product was purified by flash chromatography (EtOAc/hexanes 1:1) to afford 3r product as a colorless oil, (52 mg, 95%).  $^1\text{H NMR}$  (600 MHz, )  $\delta$  4.17 – 4.10 (m, 4H), 2.35-2.32 (m, 2H), 1.57 – 1.54 (m, 2H), 1.44-1.40 (m, 2H), 1.35 (t,  $J = 7.0$  Hz, 6H), 0.91 (t,  $J = 7.1$  Hz, 3H);  $^{13}\text{C NMR}$  (151 MHz, )  $\delta$  103.4 (d,  $J = 53.1$  Hz), 70.3 (d,  $J = 303.9$  Hz), 63.1 (d,  $J = 5.1$  Hz), 29.5, 21.9 (d,  $J = 10.1$  Hz), 19.0 (d,  $J = 4.2$  Hz), 16.1 (d,  $J = 7.1$  Hz), 13.5;  $^{31}\text{P NMR}$  (243 MHz,  $\text{CDCl}_3$ )  $\delta$  -5.45; **IR** (neat): 2934, 2205, 1727, 1459, 1393, 1256, 1027, 981; **HRMS** (ESI+) calcd for  $\text{C}_{10}\text{H}_{19}\text{O}_3\text{P}$   $[\text{M}+\text{H}]^+$  : 219.1150, found: 219.1149.

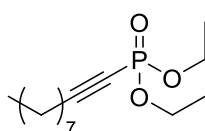

**Diethyl dec-1-yn-1-ylphosphonate (3s):** Prepared according to typical procedure I. The crude product was purified by flash chromatography (EtOAc/hexanes 1:1) to afford 3s product as a yellow oil, (64 mg, 94%).  $^1\text{H NMR}$  (600 MHz,  $\text{CDCl}_3$ )  $\delta$  4.16 – 4.09 (m, 4H), 2.33-2.30 (m, 2H), 1.58 – 1.54 (m, 2H), 1.38-1.37 (m, 2H), 1.34 (t,  $J = 7.0$  Hz, 6H), 1.29-1.25 (m, 8H), 0.86 (t,  $J = 6.9$  Hz, 3H);  $^{13}\text{C NMR}$  (151 MHz,  $\text{CDCl}_3$ )  $\delta$  103.5 (d,  $J = 53.2$  Hz), 70.3 (d,  $J = 303.7$  Hz), 63.0 (d,  $J = 5.5$  Hz), 31.8, 29.1, 29.0, 28.8, 27.5, 22.7, 19.3 (d,  $J = 4.4$  Hz), 16.1 (d,  $J = 6.8$  Hz), 14.1;  $^{31}\text{P NMR}$  (243 MHz, )  $\delta$  -5.48; **IR** (neat): 2928, 2206, 1463, 1258, 1030, 976, 733; **HRMS** (ESI+) calcd for  $\text{C}_{14}\text{H}_{28}\text{O}_3\text{P}$   $[\text{M}+\text{H}]^+$  : 275.1776, found: 275.1788.



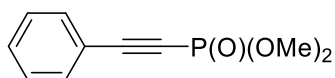

**Dimethyl (phenylethynyl)phosphonate (3t):**<sup>9</sup> Prepared according to typical procedure I. The crude product was purified by flash chromatography (EtOAc/hexanes 1:2) to afford 3t product as a colorless oil, (47 mg, 90%). **<sup>1</sup>H NMR** (600 MHz, CDCl<sub>3</sub>) δ 7.58 (d, *J* = 7.6 Hz, 2H), 7.47 (t, *J* = 7.5 Hz, 1H), 7.39 (t, *J* = 7.6 Hz, 2H), 3.88 (s, 3H), 3.86 (s, 3H); **<sup>13</sup>C NMR** (151 MHz, CDCl<sub>3</sub>) δ 132.8, 130.9, 128.7, 119.4 (d, *J* = 5.6 Hz), 100.0 (d, *J* = 53.3 Hz), 77.0 (d, *J* = 302.3 Hz), 53.5 (d, *J* = 5.1 Hz); **<sup>31</sup>P NMR** (243 MHz, CDCl<sub>3</sub>) δ -2.09; **IR** (neat): 3480, 2955, 2188, 1448, 1269, 1036, 862, 762, 690, 653.

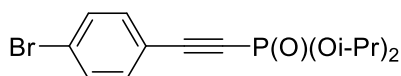

**Diisopropyl [(4-bromophenyl)ethynyl]phosphonate (4a):**<sup>9</sup> Prepared according to typical procedure I. The crude product was purified by flash chromatography (EtOAc/hexanes 1:2) to afford 4a product as a colorless oil, (80 mg, 93%). **<sup>1</sup>H NMR** (600 MHz, CDCl<sub>3</sub>) δ 7.50 (d, *J* = 8.1 Hz, 2H), 7.38 (d, *J* = 8.2 Hz, 2H), 4.84 – 4.75 (m, 2H), 1.39 (d, *J* = 3.1 Hz, 6H), 1.38 (d, *J* = 2.4 Hz, 6H); **<sup>13</sup>C NMR** (151 MHz, CDCl<sub>3</sub>) δ 133.9, 132.1, 125.4, 118.9, 96.9 (d, *J* = 52.4 Hz), 81.3 (d, *J* = 297.7 Hz), 72.6 (d, *J* = 5.6 Hz), 24.1 (d, *J* = 4.6 Hz), 23.8 (d, *J* = 4.5 Hz); **<sup>31</sup>P NMR** (243 MHz, CDCl<sub>3</sub>) δ -8.26; **IR** (neat): 3436, 2925, 2189, 1466, 1380, 1262, 1005, 889, 682, 535; **HRMS** (ESI+) calcd for C<sub>14</sub>H<sub>18</sub>BrO<sub>3</sub>P [M+H]<sup>+</sup> : 345.0255, found: 345.0266.

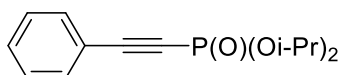

**Diisopropyl (phenylethynyl)phosphonate (4b):**<sup>9</sup> Prepared according to typical procedure I. The crude product was purified by flash chromatography (EtOAc/hexanes 1:2) to afford 4b product as a colorless oil, (61 mg, 92%). **<sup>1</sup>H NMR** (600 MHz, CDCl<sub>3</sub>) δ 7.55 (d, *J* = 7.5 Hz, 2H), 7.44 (d, *J* = 8.0 Hz, 1H), 7.37 (t, *J* = 7.8 Hz, 2H), 4.88 – 4.77 (m, 2H), 1.41 (dd, *J* = 5.8, 3.5 Hz, 12H); **<sup>13</sup>C NMR** (151 MHz, CDCl<sub>3</sub>) δ 132.6, 130.6, 128.5 (d, *J* = 24.2 Hz), 119.9 (d, *J* = 5.0 Hz), 98.2 (d, *J* = 53.0 Hz), 78.4 (d, *J* = 295.8 Hz), 72.5 (d, *J* = 5.5 Hz), 24.0 (d, *J* = 4.3 Hz), 23.7 (d, *J* = 4.9 Hz); **<sup>31</sup>P NMR** (243 MHz, CDCl<sub>3</sub>) δ -7.92; **IR** (neat): 3462, 2981, 2188, 1382, 1262, 1005, 889, 852, 760, 690, 656, 513; **HRMS** (ESI+) calcd for C<sub>14</sub>H<sub>19</sub>O<sub>3</sub>P [M+H]<sup>+</sup> : 267.1152, found: 267.1151.

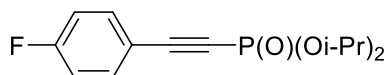

**Diisopropyl [(4-fluorophenyl)ethynyl]phosphonate (4c):**<sup>9</sup> Prepared according to typical procedure I. The crude product was purified by flash chromatography (EtOAc/hexanes 1:2) to afford 4c product as a colorless oil, (64 mg, 90%). <sup>1</sup>H NMR (600 MHz, CDCl<sub>3</sub>) δ 7.53 (dd, *J* = 8.7, 5.5 Hz, 2H), 7.05 (t, *J* = 8.5 Hz, 2H), 4.83 – 4.76 (m, 2H), 1.40-1.38 (m, 12H); <sup>13</sup>C NMR (151 MHz, CDCl<sub>3</sub>) δ 163.86 (d, *J*<sub>C-F</sub> = 253.2 Hz), 134.81 (d, *J*<sub>C-F</sub> = 8.0 Hz), 116.16 (d, *J*<sub>C-F</sub> = 22.7 Hz), 97.02 (d, *J*<sub>C-P</sub> = 53.0 Hz), 79.96 (d, *J*<sub>C-P</sub> = 298.3 Hz), 72.47 (d, *J*<sub>C-P</sub> = 5.6 Hz), 24.00 (d, *J*<sub>C-P</sub> = 4.3 Hz), 23.73 (d, *J*<sub>C-P</sub> = 4.6 Hz); <sup>31</sup>P NMR (243 MHz, CDCl<sub>3</sub>) δ -8.06; IR (neat): 3435, 2924, 2189, 1628, 1462, 1005, 798.

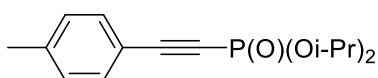

**Diisopropyl (4-tolyethynyl)phosphonate (4d):**<sup>9</sup> Prepared according to typical procedure I. The crude product was purified by flash chromatography (EtOAc/hexanes 1:2) to afford 4d product as a colorless oil, (61 mg, 95%). <sup>1</sup>H NMR (600 MHz, CDCl<sub>3</sub>) δ 7.42 (d, *J* = 8.0 Hz, 2H), 7.15 (d, *J* = 7.9 Hz, 2H), 4.83 – 4.75 (m, 2H), 2.36 (s, 3H), 1.38 (dd, *J* = 6.3, 2.9 Hz, 12H); <sup>13</sup>C NMR (151 MHz, CDCl<sub>3</sub>) δ 141.2, 132.5, 129.4, 116.8 (d, *J* = 5.7 Hz), 98.7 (d, *J* = 53.0 Hz), 79.3 (d, *J* = 300.0 Hz), 72.3 (d, *J* = 5.6 Hz), 24.0 (d, *J* = 4.3 Hz), 23.7 (d, *J* = 5.2 Hz), 21.75; <sup>31</sup>P NMR (243 MHz, CDCl<sub>3</sub>) δ -7.64; IR (neat) : 3433, 2926, 2338, 2186, 1648, 1463, 1263, 1165, 1018, 817 647; HRMS (ESI+) calcd for C<sub>15</sub>H<sub>21</sub>O<sub>3</sub>P [M+Na]<sup>+</sup> : 281.1314, found: 281.1304.

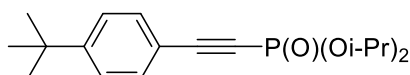

**Diisopropyl [(4-tert-butylphenyl)ethynyl]phosphonate (4e):**<sup>3</sup> Prepared according to typical procedure I. The crude product was purified by flash chromatography (EtOAc/hexanes 1:2) to afford 4e product as a colorless oil, (76 mg, 94%). <sup>1</sup>H NMR (600 MHz, CDCl<sub>3</sub>) δ 7.48 (d, *J* = 8.2 Hz, 2H), 7.38 (d, *J* = 8.0 Hz, 2H), 4.86 – 4.76 (m, 2H), 1.43 – 1.38 (m, 12H), 1.31 (s, 9H); <sup>13</sup>C NMR (151 MHz, CDCl<sub>3</sub>) δ 154.2, 132.4, 125.7, 116.9 (d, *J* = 5.7 Hz), 98.7 (d, *J* = 53.1 Hz), 79.3 (d, *J* = 300.1 Hz), 72.3 (d, *J* = 5.6 Hz), 35.1, 31.1, 24.0 (d, *J* = 4.2 Hz), 23.7 (d, *J* = 4.5 Hz); <sup>31</sup>P NMR (243 MHz, CDCl<sub>3</sub>) δ -7.65; IR (neat): 3435, 2962, 2187, 1467, 1382, 1264, 1105, 1002, 889, 834, 773; HRMS (ESI+) calcd for C<sub>18</sub>H<sub>27</sub>O<sub>3</sub>P [M+Na]<sup>+</sup> : 345.1596, found: 345.1607.

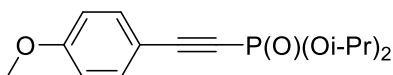

**Diisopropyl [(4-methoxyphenyl)ethynyl]phosphonate (4f):**<sup>9</sup> Prepared according to typical procedure I. The crude product was purified by flash chromatography (EtOAc/hexanes 1:2) to afford 4f product as a colorless oil, (60 mg, 81%). **<sup>1</sup>H NMR** (600 MHz, CDCl<sub>3</sub>) δ 7.47 (d, *J* = 8.7 Hz, 2H), 6.85 (d, *J* = 8.2 Hz, 2H), 4.83 – 4.74 (m, 2H), 3.81 (s, 3H), 1.38 (dd, *J* = 6.0, 2.9 Hz, 12H); **<sup>13</sup>C NMR** (151 MHz, CDCl<sub>3</sub>) δ 161.4, 134.4, 114.3, 111.8 (d, *J* = 5.6 Hz), 98.9 (d, *J* = 53.6 Hz), 78.8 (d, *J* = 301.1 Hz), 72.2 (d, *J* = 5.5 Hz), 55.5, 24.0 (d, *J* = 4.4 Hz), 23.7 (d, *J* = 5.1 Hz). **<sup>31</sup>P NMR** (243 MHz, CDCl<sub>3</sub>) δ -7.33; ; **IR** (neat): 3432, 2928, 2182, 1605, 1258, 1021, 784.

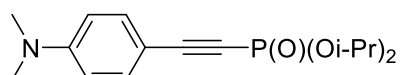

**Diisopropyl [(4-N,N dimethylaminophenyl)ethynyl]phosphonate (4g):** Prepared according to typical procedure I. The crude product was purified by flash chromatography (EtOAc/hexanes 1:2) to afford 4g product as a colorless oil, (61 mg, 79%). **<sup>1</sup>H NMR** (600 MHz, CDCl<sub>3</sub>) δ 7.41 (d, *J* = 8.7 Hz, 2H), 6.61 (d, *J* = 8.3 Hz, 2H), 4.79 (m, 2H), 3.01 (s, 6H), 1.41 – 1.38 (m, 12H); **<sup>13</sup>C NMR** (151 MHz, CDCl<sub>3</sub>) δ 151.5, 134.1, 111.5, 105.8 (d, *J* = 5.5 Hz), 101.2 (d, *J* = 54.2 Hz), 77.9 (d, *J* = 313.8 Hz), 72.0 (d, *J* = 5.5 Hz), 40.1, 24.1 (d, *J* = 4.3 Hz), 23.8 (d, *J* = 4.8 Hz); **<sup>31</sup>P NMR** (243 MHz, CDCl<sub>3</sub>) δ -6.43; **IR** (neat): 3433, 2979, 2929, 2172, 1606, 1527, 1373, 1263, 1008, 889, 858, 820, 773; **HRMS** (ESI+) calcd for C<sub>16</sub>H<sub>24</sub>NO<sub>3</sub>P [M+H]<sup>+</sup> : 310.1580, found: 310.1580.

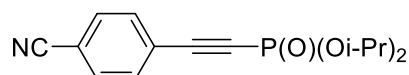

**Diisopropyl [(4-Cyanophenyl)ethynyl]phosphonate (4h):**<sup>10</sup> Prepared according to typical procedure I. The crude product was purified by flash chromatography (EtOAc/hexanes 1:2) to afford 4h product as a colorless oil, (52 mg, 72%). **<sup>1</sup>H NMR** (600 MHz, CDCl<sub>3</sub>) δ 7.69-7.64 (m, 4H), 4.86-4.80 (m, 2H), 1.42-1.41 (m, 12H); **<sup>13</sup>C NMR** (151 MHz, CDCl<sub>3</sub>) δ 133.09 (d, *J* = 1.9 Hz), 132.34, 124.74 (d, *J* = 5.6 Hz), 117.93, 114.08, 95.15 (d, *J* = 51.4 Hz), 84.43 (d, *J* = 378.2 Hz), 72.94 (d, *J* = 5.3 Hz), 23.95 (d, *J* = 4.4 Hz), 23.79 (d, *J* = 4.6 Hz); **<sup>31</sup>P NMR** (243 MHz, CDCl<sub>3</sub>) δ -9.18; **IR** (neat): 3433, 2981, 2929, 2184, 1264, 1026, 888, 863. 755; **HRMS** (ESI+) calcd for C<sub>15</sub>H<sub>18</sub>FO<sub>3</sub>P [M+Na]<sup>+</sup> : 314.0922, found: 314.0912.

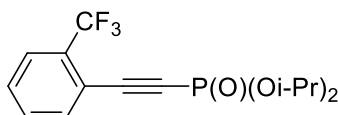

**Diisopropyl [(2-trifluoromethylbenzene)ethynyl]phosphonate (4i):** Prepared according to typical procedure I. The crude product was purified by flash chromatography (EtOAc/hexanes 1:2) to afford 4i product as a colorless oil, (72 mg, 86%).  $^1\text{H NMR}$  (600 MHz,  $\text{CDCl}_3$ )  $\delta$  7.73-7.70 (m, 2H), 7.61 – 7.52 (m, 2H), 4.90 – 4.74 (m, 2H), 1.41 (d,  $J = 6.0$  Hz, 12H).  $^{13}\text{C NMR}$  (151 MHz,  $\text{CDCl}_3$ )  $\delta$  135.2 (d,  $J_{\text{C-F}} = 2.3$  Hz), 131.8, 130.3, 126.2 (q,  $J_{\text{C-F}} = 4.4$  Hz), 123.1 (q,  $J_{\text{C-F}} = 275.4$  Hz), 117.8, 93.1 (d,  $J_{\text{C-P}} = 51.8$  Hz), 85.3 (d,  $J_{\text{C-P}} = 291.4$  Hz), 72.8 (d,  $J_{\text{C-P}} = 5.8$  Hz), 23.9 (d,  $J_{\text{C-P}} = 4.3$  Hz), 24.0 (d,  $J_{\text{C-P}} = 5.0$  Hz);  $^{31}\text{P NMR}$  (243 MHz,  $\text{CDCl}_3$ )  $\delta$  -9.32; **IR** (neat): 3432, 2984, 2928, 2194, 1318, 1265, 1137, 1002, 890, 861, 772, 666; **HRMS** (ESI+) calcd for  $\text{C}_{15}\text{H}_{18}\text{F}_3\text{O}_3\text{P}$   $[\text{M}+\text{H}]^+$  : 335.0954, found: 335.0965.

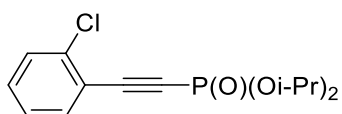

**Diisopropyl [(2-chlorophenyl)ethynyl]phosphonate (4j):**<sup>9</sup> Prepared according to typical procedure I. The crude product was purified by flash chromatography (EtOAc/hexanes 1:2) to afford 4j product as a colorless oil, (64 mg, 92%).  $^1\text{H NMR}$  (600 MHz,  $\text{CDCl}_3$ )  $\delta$  7.58 (d,  $J = 8.2$  Hz, 1H), 7.44 (d,  $J = 8.1$  Hz, 1H), 7.38 (t,  $J = 8.4$  Hz, 1H), 7.27 (d,  $J = 7.5$  Hz, 1H), 4.84 (m, 2H), 1.42 (dd,  $J = 6.2, 4.3$  Hz, 12H).  $^{13}\text{C NMR}$  (151 MHz,  $\text{CDCl}_3$ )  $\delta$  137.1, 134.5 (d,  $J = 2.0$  Hz), 131.6, 129.7, 126.8, 120.3 (d,  $J = 5.6$  Hz), 94.4 (d,  $J = 52.5$  Hz), 84.9 (d,  $J = 293.6$  Hz), 72.8 (d,  $J = 5.6$  Hz), 24.1 (d,  $J = 4.3$  Hz), 23.8 (d,  $J = 4.6$  Hz);  $^{31}\text{P NMR}$  (243 MHz,  $\text{CDCl}_3$ )  $\delta$  -8.76; **IR** (neat): 3433, 2980, 2930, 2192, 1468, 1264, 1005, 760.

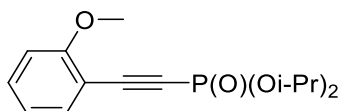

**Diisopropyl [(2-methoxyphenyl)ethynyl]phosphonate (4k):**<sup>11</sup> Prepared according to typical procedure I. The crude product was purified by flash chromatography (EtOAc/hexanes 1:2) to afford 4k product as a yellow solid, (59 mg, 79%).  $^1\text{H NMR}$  (600 MHz,  $\text{CDCl}_3$ )  $\delta$  7.46 (d,  $J = 8.6$  Hz, 1H), 7.40 – 7.35 (m, 1H), 6.91 (t,  $J = 7.5$  Hz, 1H), 6.87 (d,  $J = 8.4$  Hz, 1H), 4.85 – 4.77 (m, 2H), 3.85 (s, 3H), 1.41 – 1.38 (m, 12H);  $^{13}\text{C NMR}$  (151 MHz,  $\text{CDCl}_3$ )  $\delta$  161.7, 134.4, 132.2, 120.6, 110.9, 109.4 (d,  $J = 5.8$  Hz), 95.6 (d,  $J = 53.9$  Hz), 84.6 (d,  $J = 295.0$  Hz), 72.4 (d,  $J = 5.4$  Hz), 55.8, 24.1 (d,  $J = 4.4$  Hz), 23.7 (d,  $J = 5.2$  Hz);  $^{31}\text{P NMR}$  (243 MHz,  $\text{CDCl}_3$ )  $\delta$  -7.67; **IR** (neat): 3440, 2928, 2186, 1597, 1464, 1262, 1016, 890, 716, 650; **HRMS** (ESI+) calcd for  $\text{C}_{15}\text{H}_{21}\text{O}_4\text{P}$   $[\text{M}+\text{H}]^+$  : 297.1263, found: 297.1250.

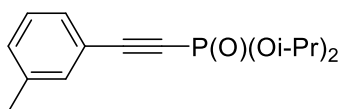

**Diisopropyl [(3-methylphenyl)ethynyl]phosphonate (4l):**<sup>6</sup> Prepared according to typical procedure I. The crude product was purified by flash chromatography (EtOAc/hexanes 1:2) to afford 4l product as a colorless oil, (64 mg, 91%). **<sup>1</sup>H NMR** (600 MHz, CDCl<sub>3</sub>) δ 7.34 – 7.31 (m, 2H), 7.22 (d, *J* = 4.3 Hz, 2H), 4.83 – 4.74 (m, 2H), 2.32 (s, 3H), 1.38 (dd, *J* = 5.9, 3.4 Hz, 12H); **<sup>13</sup>C NMR** (151 MHz, CDCl<sub>3</sub>) δ 138.5, 133.0 (d, *J* = 1.8 Hz), 131.5, 129.7, 128.5, 119.7 (d, *J* = 5.4 Hz), 98.5 (d, *J* = 52.9 Hz), 79.6 (d, *J* = 298.4 Hz), 72.4 (d, *J* = 5.5 Hz), 24.0 (d, *J* = 4.3 Hz), 23.7 (d, *J* = 4.6 Hz), 21.2; **<sup>31</sup>P NMR** (243 MHz, CDCl<sub>3</sub>) δ -7.84; **IR** (neat): 3433, 2982, 2929, 2178, 1384, 1265, 1004, 786, 656.

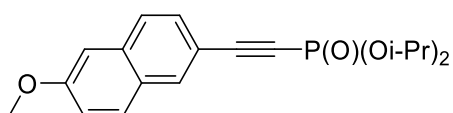

**Diisopropyl [(6-methoxynaphthalen-2-yl)ethynyl]phosphonate (4m):** Prepared according to typical procedure I. The crude product was purified by flash chromatography (EtOAc/hexanes 1:2) to afford 4m product as a colorless oil, (54 mg, 63%). **<sup>1</sup>H NMR** (600 MHz, CDCl<sub>3</sub>) δ 8.00 (s, 1H), 7.72-7.68 (m, 2H), 7.50 – 7.48 (m, 1H), 7.17 (dd, *J* = 9.1, 2.2 Hz, 1H), 7.10 (s, 1H), 4.88 – 4.78 (m, 2H), 3.91 (s, 3H), 1.42 (t, *J* = 6.2 Hz, 12H); **<sup>13</sup>C NMR** (151 MHz, CDCl<sub>3</sub>) δ 159.3, 135.4, 133.5 (d, *J* = 2.0 Hz), 129.8, 128.7, 128.1, 127.2, 120.1, 114.5 (d, *J* = 5.2 Hz), 106.0, 99.3 (d, *J* = 52.9 Hz), 79.5 (d, *J* = 299.7 Hz), 72.4 (d, *J* = 5.6 Hz), 55.5, 24.1 (d, *J* = 4.5 Hz), 23.8 (d, *J* = 5.1 Hz); **<sup>31</sup>P NMR** (243 MHz, CDCl<sub>3</sub>) δ -7.61; **IR** (neat): 3465, 2980, 2932, 2184, 1628, 1465, 1388, 1260, 999, 780, 640; **HRMS** (ESI+) calcd for C<sub>19</sub>H<sub>23</sub>O<sub>4</sub>P [M+H]<sup>+</sup> : 347.1412, found: 347.1392.

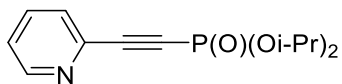

**Diisopropyl (pyridine-2-ylethynyl)phosphonate (4n):** Prepared according to typical procedure I. The crude product was purified by flash chromatography (EtOAc/hexanes 1:2) to afford 4n product as a colorless oil, (25 mg, 37%). **<sup>1</sup>H NMR** (600 MHz, CDCl<sub>3</sub>) δ 8.63 (d, *J* = 4.7 Hz, 1H), 7.72-7.69 (m, 1H), 7.57 (d, *J* = 7.9 Hz, 1H), 7.34 (dd, *J* = 7.5, 5.0 Hz, 1H), 4.82 (m, 2H), 1.40 (t, *J* = 5.7 Hz, 12H); **<sup>13</sup>C NMR** (151 MHz, CDCl<sub>3</sub>) δ 150.5, 136.4, 128.6, 124.7, 95.9 (d, *J* = 50.6 Hz), 79.3 (d, *J* = 291.8 Hz), 72.9 (d, *J* = 5.6 Hz), 24.0 (d, *J* = 4.6 Hz), 23.7 (d,

$J = 4.7$  Hz).  $^{31}\text{P}$  NMR (243 MHz,  $\text{CDCl}_3$ )  $\delta$  -9.13; IR (neat) : 3432, 2929, 2345, 2195, 1460, 1262, 1014, 785; HRMS (ESI+) calcd for  $\text{C}_{13}\text{H}_{18}\text{NO}_3\text{P}$   $[\text{M}+\text{H}]^+$  : 268.1110, found: 268.1097.

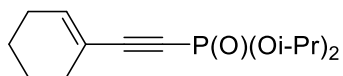

**Diisopropyl (cyclohexen-1-ylethynyl)phosphonate (4o):**<sup>12</sup> Prepared according to typical procedure I. The crude product was purified by flash chromatography (EtOAc/hexanes 1:2) to afford 4o product as a colorless oil, (61 mg, 90%).  $^1\text{H}$  NMR (600 MHz,  $\text{CDCl}_3$ )  $\delta$  6.40 (s, 1H), 4.79 – 4.69 (m, 2H), 2.14 (d,  $J = 5.0$  Hz, 4H), 1.66 – 1.62 (m, 2H), 1.60 (m, 2H), 1.37 (d,  $J = 6.1$  Hz, 12H);  $^{13}\text{C}$  NMR (151 MHz,  $\text{CDCl}_3$ )  $\delta$  141.4 (d,  $J = 3.1$  Hz), 118.7 (d,  $J = 5.6$  Hz), 100.6 (d,  $J = 52.8$  Hz), 77.2 (d,  $J = 301.5$  Hz), 72.1 (d,  $J = 5.3$  Hz), 28.0, 25.9, 24.0 (d,  $J = 4.5$  Hz), 23.7 (d,  $J = 5.1$  Hz), 21.9, 21.1;  $^{31}\text{P}$  NMR (243 MHz,  $\text{CDCl}_3$ )  $\delta$  -7.10; IR (neat): 3434, 2929, 2341, 1651, 1265, 1166, 1026, 864, 815, 656.

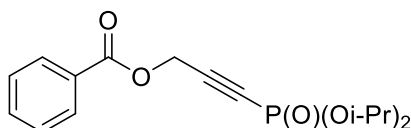

**3-(diisopropylphosphoryl)prop-2-yn-1-yl benzoate (4p):** Prepared according to typical procedure I. The crude product was purified by flash chromatography (EtOAc/hexanes 1:2) to afford 4p product as a colorless oil, (75 mg, 92%).  $^1\text{H}$  NMR (600 MHz,  $\text{CDCl}_3$ )  $\delta$  8.02 (d,  $J = 7.4$  Hz, 2H), 7.57 (t,  $J = 6.9$  Hz, 1H), 7.43 (t,  $J = 7.1$  Hz, 2H), 4.98 (s, 2H), 4.74 (m, 2H), 1.34 (d,  $J = 5.7$  Hz, 12H);  $^{13}\text{C}$  NMR (151 MHz,  $\text{CDCl}_3$ )  $\delta$  165.5, 133.7, 129.9, 129.0, 128.6, 93.0 (d,  $J = 51.2$  Hz), 78.3 (d,  $J = 292.9$  Hz), 72.8 (d,  $J = 5.6$  Hz), 52.1 (d,  $J = 4.3$  Hz), 23.9 (d,  $J = 4.3$  Hz), 23.6 (d,  $J = 4.5$  Hz); IR (neat) : 3448, 2983, 2218, 1730, 1452, 1376, 1262, 1101, 1003, 774, 715, 648; HRMS (ESI+) calcd for  $\text{C}_{16}\text{H}_{21}\text{O}_5\text{P}$   $[\text{M}+\text{K}]^+$  : 363.0764, found: 363.0766.

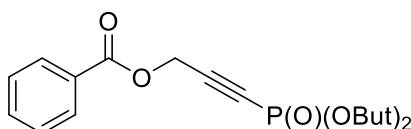

**3-(dibutylphosphoryl)prop-2-yn-1-yl benzoate (4q):** Prepared according to typical procedure I. The crude product was purified by flash chromatography (EtOAc/hexanes 1:2) to afford 4q product as a colorless oil, (78 mg, 88%).  $^1\text{H}$  NMR (600 MHz,  $\text{CDCl}_3$ )  $\delta$  8.02 (d,  $J = 8.5$  Hz, 2H), 7.57 (t,  $J = 7.4$  Hz, 1H), 7.44 (t,  $J = 7.8$  Hz, 2H), 4.99 (s, 2H), 4.09 (m, 4H), 1.68 – 1.65 (m, 4H), 1.41-1.37 (m, 4H), 0.91-0.88 (m, 6H);  $^{13}\text{C}$  NMR (151 MHz,  $\text{CDCl}_3$ )  $\delta$  165.4,

133.7, 129.9, 128.6, 93.9 (d,  $J = 50.8$  Hz), 76.7 (d,  $J = 293.8$  Hz), 67.3 (d,  $J = 5.8$  Hz), 52.0 (d,  $J = 4.3$  Hz), 32.2 (d,  $J = 7.1$  Hz), 18.7, 13.6; **IR** (neat): 3446, 2962, 2220, 1730, 1554, 1263, 1021, 715; **HRMS** (ESI+) calcd for  $C_{18}H_{25}O_3P$   $[M+H]^+$  : 353.1518, found: 353.1512.

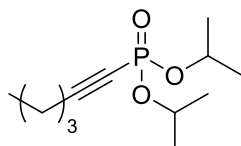

**Diisopropyl hex-1-yn-1-ylphosphonate (4r)**: Prepared according to typical procedure I. The crude product was purified by flash chromatography (EtOAc/hexanes 1:1) to afford 4r product as a colorless oil, (58 mg, 94%).  **$^1H$  NMR** (600 MHz,  $CDCl_3$ )  $\delta$  4.75-4.70 (m, 2H), 2.35-2.32 (m, 2H), 1.59 – 1.53 (m, 2H), 1.45-1.41 (m, 2H), 1.39 – 1.33 (m, 12H), 0.92 (t,  $J = 7.2$  Hz, 3H);  **$^{13}C$  NMR** (151 MHz,  $CDCl_3$ )  $\delta$  102.3 (d,  $J = 53.2$  Hz), 72.0 (d,  $J = 5.4$  Hz), 71.8 (d,  $J = 302.8$  Hz), 29.5, 23.9 (d,  $J = 4.6$  Hz), 23.6 (d,  $J = 4.5$  Hz), 21.9 (s), 18.9 (d,  $J = 4.5$  Hz), 13.5;  **$^{31}P$  NMR** (243 MHz,  $CDCl_3$ )  $\delta$  -7.98; **IR** (neat): 2982, 2937, 2206, 1466, 1382, 1256, 1108, 1001, 889, 775; **HRMS** (ESI+) calcd for  $C_{12}H_{23}O_3P$   $[M+Na]^+$  : 269.1283, found: 269.1301.

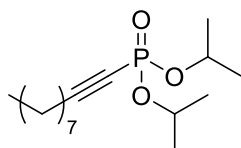

**Diisopropyl dec-1-yn-1-ylphosphonate (4s)**: Prepared according to typical procedure I. The crude product was purified by flash chromatography (EtOAc/hexanes 1:1) to afford 4s product as a yellow oil, (69 mg, 91%).  **$^1H$  NMR** (600 MHz,  $CDCl_3$ )  $\delta$  4.75 – 4.62 (m, 2H), 2.30-2.27 (m, 2H), 1.56-1.52 (m, 2H), 1.39 – 1.34 (m, 2H), 1.32 (d,  $J = 6.2$  Hz, 12H), 1.26 – 1.21 (m, 8H), 0.84 (t,  $J = 7.1$  Hz, 3H);  **$^{13}C$  NMR** (151 MHz,  $CDCl_3$ )  $\delta$  102.3 (d,  $J = 53.3$  Hz), 72.0 (d,  $J = 5.2$  Hz), 71.8 (d,  $J = 302.8$  Hz), 31.8, 29.1, 29.0, 28.8, 27.5, 23.9 (d,  $J = 4.3$  Hz), 23.6 (d,  $J = 4.5$  Hz), 22.7, 19.2 (d,  $J = 4.3$  Hz), 14.1;  **$^{31}P$  NMR** (243 MHz, )  $\delta$  -8.00; **IR** (neat): 2929, 2206, 1729, 1466, 1382, 1257, 1106, 996, 732; **HRMS** (ESI+) calcd for  $C_{16}H_{31}O_3P$   $[M+K]^+$  : 341.1648, found: 341.1655.

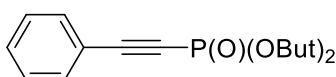

**Dibutyl (phenylethynyl)phosphonate (4t)**:<sup>9</sup> Prepared according to typical procedure I. The crude product was purified by flash chromatography (EtOAc/hexanes 1:2) to afford 4t product as a colorless oil, (68 mg, 92%).  **$^1H$  NMR** (600 MHz,  $CDCl_3$ )  $\delta$  7.56 (d,  $J = 7.4$  Hz, 2H), 7.46

(t,  $J = 7.4$  Hz, 1H), 7.38 (t,  $J = 7.8$  Hz, 2H), 4.16 (m, 4H), 1.76 – 1.71 (m, 4H), 1.46 (m, 4H), 0.96 (t,  $J = 7.4$  Hz, 6H);  $^{13}\text{C}$  NMR (151 MHz,  $\text{CDCl}_3$ )  $\delta$  132.7 (d,  $J = 2.0$  Hz), 130.7, 128.6, 119.7 (d,  $J = 5.4$  Hz), 99.1 (d,  $J = 52.5$  Hz), 78.4 (d,  $J = 299.6$  Hz), 67.0 (d,  $J = 5.8$  Hz), 32.3 (d,  $J = 7.1$  Hz), 18.8, 13.6;  $^{31}\text{P}$  NMR (243 MHz,  $\text{CDCl}_3$ )  $\delta$  -4.97; IR (neat): 3433, 2933, 2188, 1466, 1269, 1023, 857, 760, 689.

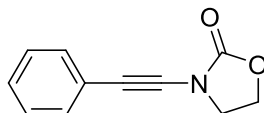

**3-(phenylethynyl)oxazolidin-2-one (5a):**<sup>13</sup> Prepared according to typical procedure II. The crude product was purified by flash chromatography (EtOAc/hexanes 1:2) to afford 5a product as a white solid, (44 mg, 95%),  $^1\text{H}$  NMR (500 MHz,  $\text{CDCl}_3$ )  $\delta$  7.46 – 7.42 (m, 2H), 7.30 (m, 3H), 4.51 – 4.44 (m, 2H), 4.00 (m, 2H);  $^{13}\text{C}$  NMR (126 MHz,  $\text{CDCl}_3$ )  $\delta$  156.0, 131.7, 128.4, 128.3, 122.3, 79.1, 71.3, 63.2, 47.1; IR (KBr): 2934, 2264, 1757, 1423, 1218, 1091, 748, 690; HRMS (ESI+) calcd for  $\text{C}_{11}\text{H}_9\text{NO}_2$   $[\text{M}+\text{H}]^+$  : 188.0711, found: 188.0701.

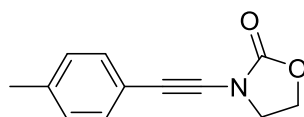

**3-(p-tolyethynyl)oxazolidin-2-one (5b):**<sup>13</sup> Prepared according to typical procedure II. The crude product was purified by flash chromatography (EtOAc/hexanes 1:2) to afford 5b product as a white solid, solid (46 mg, 91%),  $^1\text{H}$  NMR (500 MHz,  $\text{CDCl}_3$ )  $\delta$  7.33 (d,  $J = 7.8$  Hz, 2H), 7.11 (d,  $J = 7.7$  Hz, 2H), 4.48 (t,  $J = 7.9$  Hz, 2H), 4.04 – 3.97 (m, 2H), 2.34 (s, 3H);  $^{13}\text{C}$  NMR (126 MHz,  $\text{CDCl}_3$ )  $\delta$  156.2, 138.5, 131.8, 129.2, 119.1, 78.4, 71.4, 63.1, 47.2, 21.6; IR (KBr): 2954, 2922, 1706, 1601, 1428, 1316, 1274, 1118, 1054, 972, 763.

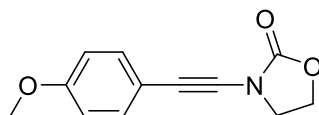

**3-(4-methoxyphenylethynyl)oxazolidin-2-one (5c):**<sup>13</sup> Prepared according to typical procedure II. The crude product was purified by flash chromatography (EtOAc/hexanes 1:2) to afford 5c product as a white solid, (50 mg, 93%),  $^1\text{H}$  NMR (500 MHz,  $\text{CDCl}_3$ )  $\delta$  7.41 – 7.36 (m, 2H), 6.86 – 6.79 (m, 2H), 4.46 (m, 2H), 4.01 – 3.94 (m, 2H), 3.80 (s, 3H);  $^{13}\text{C}$  NMR (126 MHz,  $\text{CDCl}_3$ )  $\delta$  159.8, 156.2, 133.6, 114.0, 77.7, 71.0, 63.1, 55.4, 47.2; IR (KBr): 2959, 2920,



2266, 1746, 1606, 1423, 1253, 1217, 1089, 1025, 838; **HRMS** (ESI+) calcd for C<sub>12</sub>H<sub>11</sub>NO<sub>3</sub> [M+H]<sup>+</sup> : 218.0817, found: 218.0817.

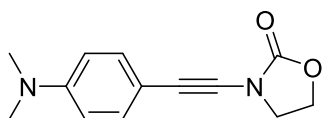

**3-(4-N,N-dimethylaminophenylethynyl)oxazolidin-2-one (5d)**: Prepared according to typical procedure II. The crude product was purified by flash chromatography (EtOAc/hexanes 1:2) to afford 5d product as a white solid, (47 mg, 82%), **<sup>1</sup>H NMR** (500 MHz, CDCl<sub>3</sub>) δ 7.33 (d, *J* = 8.8 Hz, 2H), 6.61 (d, *J* = 8.8 Hz, 2H), 4.49 – 4.42 (m, 2H), 4.01 – 3.94 (m, 2H), 2.97 (s, 6H); **<sup>13</sup>C NMR** (126 MHz, CDCl<sub>3</sub>) δ 156.4, 150.4, 133.5, 111.8, 108.6, 72.02, 63.0, 47.4, 40.3; **IR** (KBr) : 2919, 2257, 1745, 1612, 1424, 1224, 1085, 1028, 816; **HRMS** (ESI+) calcd for C<sub>13</sub>H<sub>14</sub>N<sub>2</sub>O<sub>2</sub> [M+H]<sup>+</sup> : 231.1134, found: 231.1138.

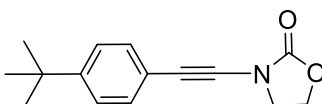

**3-(4-tert-butylphenylethynyl)oxazolidin-2-one (5e)**:<sup>14</sup> Prepared according to typical procedure II. The crude product was purified by flash chromatography (EtOAc/hexanes 1:2) to afford 5e product as a white solid, (55 mg, 90%), **<sup>1</sup>H NMR** (600 MHz, CDCl<sub>3</sub>) δ 7.38 (d, *J* = 8.1 Hz, 2H), 7.32 (d, *J* = 8.4 Hz, 2H), 4.48 (t, *J* = 7.8 Hz, 2H), 4.03 – 3.97 (m, 2H), 1.30 (s, 9H); **<sup>13</sup>C NMR** (151 MHz, CDCl<sub>3</sub>) δ 156.1, 151.6, 131.5, 125.4, 119.1, 78.4, 71.3, 63.1, 60.5, 47.2, 34.9, 31.3; **IR** (KBr) : 2959, 2925, 2260, 1766, 1428, 1218, 1168, 1086, 1031, 837, 749.

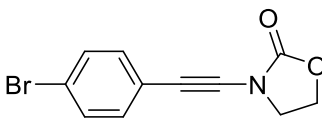

**3-(4-bromophenylethynyl)oxazolidin-2-one (5f)**:<sup>15</sup> Prepared according to typical procedure II. The crude product was purified by flash chromatography (EtOAc/hexanes 1:2) to afford 5f product as a white solid, (58 mg, 88%) **<sup>1</sup>H NMR** (500 MHz, CDCl<sub>3</sub>) δ 7.46 – 7.42 (m, 2H), 7.32 – 7.28 (m, 2H), 4.54 – 4.46 (m, 2H), 4.04 – 3.99 (m, 2H); **<sup>13</sup>C NMR** (126 MHz, CDCl<sub>3</sub>) δ 155.9, 133.1, 131.7, 122.5, 121.3, 80.1, 70.5, 63.2, 47.1, 29.8; **IR** (KBr) : 2925, 2266, 1753, 1639, 1423, 1216, 1163, 1030, 826, 745; **HRMS** (ESI+) calcd for C<sub>11</sub>H<sub>8</sub>BrNO<sub>2</sub> [M+H]<sup>+</sup> : 265.9817, found: 265.9816.

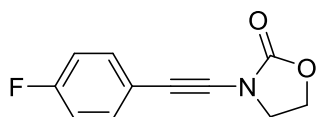

**3-(4-fluorophenylethynyl)oxazolidin-2-one (5g):**<sup>15</sup> Prepared according to typical procedure II. The crude product was purified by flash chromatography (EtOAc/hexanes 1:2) to afford 5g product as a white solid, (46 mg, 90%) **<sup>1</sup>H NMR** (500 MHz, CDCl<sub>3</sub>) δ 7.37 – 7.32 (m, 2H), 6.93 (t, *J* = 8.7 Hz, 2H), 4.43-4.39 (m, 2H), 3.94-3.91 (m, 2H); **<sup>13</sup>C NMR** (126 MHz, CDCl<sub>3</sub>) δ 162.5 (d, *J* = 249.5 Hz), 156.0, 133.7 (d, *J* = 8.2 Hz), 118.2, 115.6 (d, *J* = 22.1 Hz), 78.7, 70.2, 63.2, 47.0; **IR** (KBr): 2922, 2257, 1748, 1639, 1425, 1213, 1168, 1032, 829, 744.

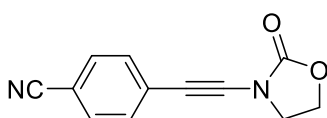

**3-(4-cyanophenylethynyl)oxazolidin-2-one (5h):**<sup>16</sup> Prepared according to typical procedure II. The crude product was purified by flash chromatography (EtOAc/hexanes 1:2) to afford 5h product as a colourless oil, (43 mg, 81%) **<sup>1</sup>H NMR** (600 MHz, CDCl<sub>3</sub>) δ 7.59 (d, *J* = 8.0 Hz, 2H), 7.50 (d, *J* = 8.8 Hz, 2H), 4.55 – 4.50 (m, 2H), 4.06 – 4.02 (m, 2H); **<sup>13</sup>C NMR** (151 MHz, CDCl<sub>3</sub>) δ 155.9, 132.1, 131.5, 127.5, 118.6, 111.3, 84.5, 70.6, 63.3, 46.9, 31.0; **IR** (neat) : 2954, 2928, 2187, 1776, 1445, 1268, 1038, 862, 762.

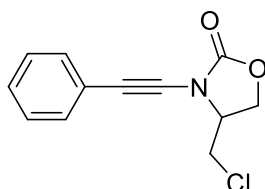

**4-(chloromethyl)-3-(phenylethynyl)oxazolidin-2-one (5i):** Prepared according to typical procedure II. The crude product was purified by flash chromatography (EtOAc/hexanes 1:2) to afford 5i product as a white solid, (57 mg, 96%) **<sup>1</sup>H NMR** (500 MHz, CDCl<sub>3</sub>) δ 7.45-7.43 (m, 2H), 7.36 – 7.28 (m, 3H), 4.91-4.86 (m, 1H), 4.10 (t, *J* = 9.0 Hz, 1H), 3.92-3.89 (m, 1H), 3.75 (d, *J* = 5.0 Hz, 2H); **<sup>13</sup>C NMR** (126 MHz, CDCl<sub>3</sub>) δ 154.6, 131.5, 128.2, 121.8, 78.2, 72.6, 71.3, 49.6, 44.0, 30.8, 29.5; **IR** (KBr) : 2921, 2263, 1760, 1418, 1213, 1167, 1045, 757; **HRMS** (ESI+) calcd for C<sub>12</sub>H<sub>10</sub>ClNO<sub>2</sub> [M+H]<sup>+</sup> : 236.0478, found: 236.0483.

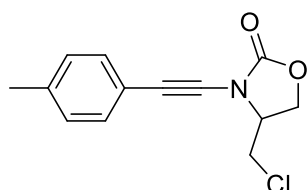

**4-(chloromethyl)-3-(p-tolyethynyl)oxazolidin-2-one (5j):** Prepared according to typical procedure II. The crude product was purified by flash chromatography (EtOAc/hexanes 1:2) to afford 5j product as a solid (57 mg, 92%)  $^1\text{H NMR}$  (500 MHz,  $\text{CDCl}_3$ )  $\delta$  7.33 (d,  $J = 8.0$  Hz, 2H), 7.11 (d,  $J = 7.9$  Hz, 2H), 4.89-4.84 (m, 1H), 4.08 (t,  $J = 9.0$  Hz, 1H), 3.89 (q,  $J = 9.2$ , 5.8 Hz, 1H), 3.74 (d,  $J = 5.0$  Hz, 2H), 2.34 (s, 3H);  $^{13}\text{C NMR}$  (126 MHz,  $\text{CDCl}_3$ )  $\delta$  154.9, 138.7, 131.7, 129.2, 118.8, 77.8, 72.8, 71.4, 49.7, 44.3, 21.5; **IR** (KBr): 2916, 2247, 1771, 1424, 1212, 1044, 821, 744; **HRMS** (ESI+) calcd for  $\text{C}_{13}\text{H}_{12}\text{ClNO}_2$   $[\text{M}+\text{H}]^+$  : 250.0635, found: 250.0638.

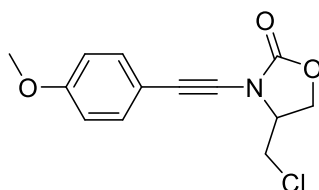

**4-(chloromethyl)-3-(4-methoxyphenylethynyl)oxazolidin-2-one (5k):** Prepared according to typical procedure II. The crude product was purified by flash chromatography (EtOAc/hexanes 1:2) to afford 5k product as a solid (56 mg, 85%)  $^1\text{H NMR}$  (500 MHz,  $\text{CDCl}_3$ )  $\delta$  7.31 (d,  $J = 8.9$  Hz, 2H), 6.76 (d,  $J = 8.8$  Hz, 2H), 4.84 – 4.76 (m, 1H), 3.99 (t,  $J = 9.0$  Hz, 1H), 3.79 (q,  $J = 9.2$ , 5.8 Hz, 1H), 3.72 (s, 3H), 3.66 (t,  $J = 4.9$  Hz, 2H);  $^{13}\text{C NMR}$  (126 MHz,  $\text{CDCl}_3$ )  $\delta$  159.9, 155.0, 133.6, 114.0, 72.7, 71.1, 55.3, 49.7, 44.4; **IR** (KBr): 2933, 2257, 1763, 1604, 1422, 1246, 1097, 1044, 832, 743; **HRMS** (ESI+) calcd for  $\text{C}_{13}\text{H}_{12}\text{ClNO}_3$   $[\text{M}+\text{H}]^+$  : 266.0584, found: 266.0564.

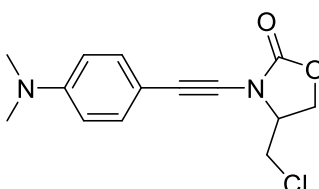

**4-(chloromethyl)-3-(4-N,N-dimethylaminophenylethynyl)oxazolidin-2-one (5l):** Prepared according to typical procedure II. The crude product was purified by flash chromatography (EtOAc/hexanes 1:2) to afford 5l product as a white solid (57 mg, 82%),  $^1\text{H NMR}$  (500 MHz,  $\text{CDCl}_3$ )  $\delta$  7.25 (d,  $J = 8.8$  Hz, 2H), 6.54 (d,  $J = 8.8$  Hz, 2H), 4.77 (m, 1H), 3.99 (t,  $J = 9.0$  Hz, 1H), 3.79 (q,  $J = 9.2$ , 5.9 Hz, 1H), 3.65 (d,  $J = 5.2$  Hz, 2H), 2.90 (s, 6H);  $^{13}\text{C NMR}$  (151 MHz,  $\text{CDCl}_3$ )  $\delta$  156.0, 150.4, 140.5, 124.5, 115.2, 112.2, 107.6, 70.5, 47.4, 46.4, 40.4; **IR** (KBr) : 2929, 2251, 1730, 1607, 1400, 1197, 1086, 947, 812, 747; **HRMS** (ESI+) calcd for  $\text{C}_{14}\text{H}_{15}\text{ClN}_2\text{O}_2$   $[\text{M}+\text{H}]^+$  : 279.0900, found: 279.0898.

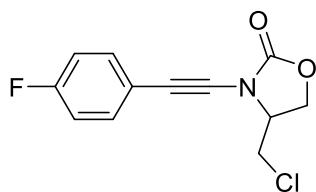

**4-(chloromethyl)-3-(4-fluorophenylethynyl)oxazolidin-2-one (5m):** Prepared according to typical procedure II. The crude product was purified by flash chromatography (EtOAc/hexanes 1:2) to afford 5m product as a solid (57 mg, 90%),  $^1\text{H NMR}$  (500 MHz,  $\text{CDCl}_3$ )  $\delta$  7.48 – 7.34 (m, 2H), 7.04 – 6.94 (m, 2H), 4.95 – 4.85 (m, 1H), 4.09 (t,  $J = 9.0$  Hz, 1H), 3.89 (q,  $J = 9.2$ , 5.8 Hz, 1H), 3.81 – 3.69 (m, 2H);  $^{13}\text{C NMR}$  (126 MHz,  $\text{CDCl}_3$ )  $\delta$  162.6 (d,  $J = 249.6$  Hz), 154.9, 133.8 (d,  $J = 7.9$  Hz), 118.0, 115.7 (d,  $J = 22.1$  Hz), 78.1, 72.8, 70.4, 49.6, 44.3; **IR** (KBr): 2922, 2259, 1758, 1421, 1207, 1168, 1040, 837; **HRMS** (ESI+) calcd for  $\text{C}_{12}\text{H}_9\text{FCINO}_2$   $[\text{M}+\text{H}]^+$  : 276.0204, found: 276.0215.

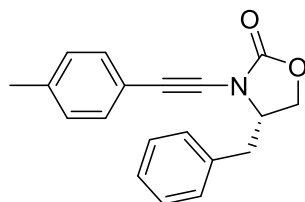

**(S)-4-Benzyl-3-(4-methylphenylethynyl)oxazolidin-2-one (5n):**<sup>17</sup> Prepared according to typical procedure II. The crude product was purified by flash chromatography (EtOAc/hexanes 1:2) to afford 5n product as a white solid (55 mg, 75%)  $^1\text{H NMR}$  (500 MHz,  $\text{CDCl}_3$ )  $\delta$  7.35 (t,  $J = 8.0$  Hz, 4H), 7.30 (d,  $J = 7.2$  Hz, 1H), 7.24 (d,  $J = 7.3$  Hz, 2H), 7.13 (d,  $J = 7.9$  Hz, 2H), 4.40 – 4.32 (m, 2H), 4.17 (dd,  $J = 7.0$ , 4.2 Hz, 1H), 3.30 (dd,  $J = 13.9$ , 3.3 Hz, 1H), 3.05 – 2.97 (m, 1H), 2.36 (s, 3H);  $^{13}\text{C NMR}$  (126 MHz,  $\text{CDCl}_3$ )  $\delta$  155.7, 138.6, 134.4, 131.8, 129.7, 129.5, 129.2, 127.7, 119.2, 73.5, 67.6, 58.7, 38.1, 29.8, 21.6; **IR** (KBr) : 2922, 2258, 1757, 1419, 1262, 1092, 1025, 815.

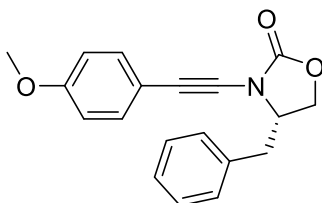

**(S)-4-Benzyl-3-(4-methoxyphenylethynyl)oxazolidin-2-one (5o):**<sup>17</sup> Prepared according to typical procedure II. The crude product was purified by flash chromatography (EtOAc/hexanes 1:2) to afford 5o product as a white solid (63 mg, 82%)  $^1\text{H NMR}$  (500 MHz,  $\text{CDCl}_3$ )  $\delta$  7.36 –

7.33 (m, 2H), 7.28 (t,  $J = 7.3$  Hz, 2H), 7.23 (d,  $J = 7.3$  Hz, 1H), 7.17 (d,  $J = 7.1$  Hz, 2H), 6.78 (d,  $J = 8.8$  Hz, 2H), 4.33 – 4.25 (m, 2H), 4.12 – 4.07 (m, 1H), 3.75 (s, 3H), 3.22 (dd,  $J = 13.8$ , 3.7 Hz, 1H), 2.95-2.91 (m, 1H);  $^{13}\text{C}$  NMR (126 MHz,  $\text{CDCl}_3$ )  $\delta$  159.9, 155.8, 134.4, 133.7, 129.5, 129.2, 127.7, 114.2, 114.1, 73.2, 67.6, 58.7, 55.4, 38.1, 29.8; IR (KBr): 2924, 2256, 1766, 1638, 1419, 1214, 1086, 831, 746.

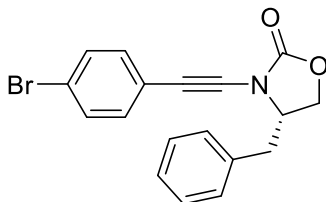

**(S)-4-Benzyl-3-(4-bromophenylethynyl)oxazolidin-2-one (5p):** Prepared according to typical procedure II. The crude product was purified by flash chromatography (EtOAc/hexanes 1:2) to afford 5p product as a white solid (60 mg, 68%)  $^1\text{H}$  NMR (500 MHz,  $\text{CDCl}_3$ )  $\delta$  7.45 (d,  $J = 8.4$  Hz, 2H), 7.35 (d,  $J = 7.6$  Hz, 2H), 7.30 (dd,  $J = 7.6$ , 3.2 Hz, 3H), 7.24 (d,  $J = 7.2$  Hz, 2H), 4.42 – 4.34 (m, 2H), 4.18 (dd,  $J = 7.6$ , 4.5 Hz, 1H), 3.28 (dd,  $J = 13.9$ , 3.9 Hz, 1H), 3.03-2.98 (m, 1H);  $^{13}\text{C}$  NMR (151 MHz, )  $\delta$  155.5, 134.3, 133.1, 131.7, 129.5, 129.2, 128.1, 127.8, 122.6, 121.3, 79.1, 72.6, 67.7, 58.6, 38.3, 31.1; IR (KBr): 2920, 2253, 1759, 1414, 1210, 1187, 1093, 1066, 994, 820, 752, 704; HRMS (ESI+) calcd for  $\text{C}_{18}\text{H}_{14}\text{BrNO}_3$   $[\text{M}+\text{H}]^+$  : 356.0286 found: 356.0283.

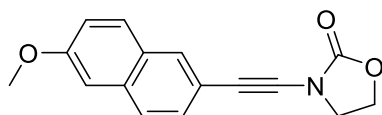

**3-[(6-methoxynaphthalen-2-yl)ethynyl]oxazolidin-2-one (5q):** Prepared according to typical procedure II. The crude product was purified by flash chromatography (EtOAc/hexanes 1:2) to afford 5q product as a solid, (52 mg, 78%),  $^1\text{H}$  NMR (500 MHz,  $\text{DMSO}+\text{CDCl}_3$ )  $\delta$  7.88 (s, 1H), 7.73 (s, 2H), 7.41 (s, 1H), 7.18 (m, 2H), 4.52 (s, 2H), 4.06 (s, 2H), 3.91 (d,  $J = 2.6$  Hz, 3H);  $^{13}\text{C}$  NMR (126 MHz,  $\text{DMSO}+\text{CDCl}_3$ )  $\delta$  156.6, 154.4, 132.3, 129.2, 127.6, 127.1, 126.6, 125.5, 117.9, 115.4, 104.3, 78.2, 69.2, 62.0, 53.7, 45.4; IR (KBr): 2923, 2253, 1756, 1647, 1486, 1220, 1026, 1002, 826, 765; HRMS (ESI+) calcd for  $\text{C}_{16}\text{H}_{13}\text{NO}_3$   $[\text{M}+\text{H}]^+$  : 268.0974, found: 268.0982.

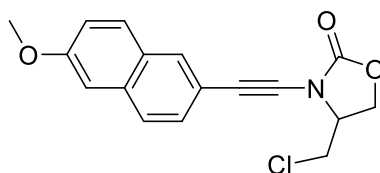

**4-(chloromethyl)-3-[(6-methoxynaphthalen-2-yl)ethynyl]oxazolidin-2-one (5r):** Prepared according to typical procedure II. The crude product was purified by flash chromatography (EtOAc/hexanes 1:2) to afford 5r product as a solid, (63 mg, 80%),  $^1\text{H NMR}$  (500 MHz,  $\text{CDCl}_3$ )  $\delta$  7.90 (d,  $J = 9.4$  Hz, 1H), 7.74 (s, 2H), 7.42 (s, 1H), 7.27 – 7.11 (m, 2H), 5.07 (s, 1H), 4.18-4.16 (m, 1H), 3.97-3.94 (m, 2H), 3.87-3.85 (m, 1H), 3.39 – 3.33 (m, 3H);  $^{13}\text{C NMR}$  (126 MHz,  $\text{CDCl}_3$ )  $\delta$  156.4, 153.2, 132.2, 129.1, 127.5, 127.4, 127.0, 126.9, 126.5, 125.4, 125.3, 117.7, 115.0, 104.2, 77.6, 71.7, 69.2, 53.6, 47.4, 43.9; **IR** (KBr): 2924, 2253, 1759, 1640, 1487, 1218, 1027, 1002, 825, 764; **HRMS** (ESI+) calcd for  $\text{C}_{17}\text{H}_{14}\text{ClNO}_3$   $[\text{M}+\text{H}]^+$  : 316.0740, found: 316.0725.

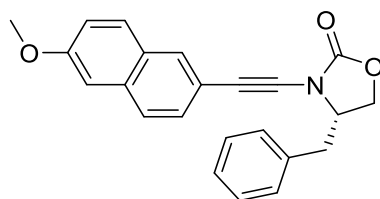

**(S)-4-Benzyl-3-[(6-methoxynaphthalen-2-yl)ethynyl]oxazolidin-2-one (5s):** Prepared according to typical procedure II. The crude product was purified by flash chromatography (EtOAc/hexanes 1:2) to afford 5s product as a solid, (67 mg, 75%),  $^1\text{H NMR}$  (500 MHz, DMSO)  $\delta$  7.93 (s, 1H), 7.84-7.80 (m, 2H), 7.41 (dd,  $J = 8.4, 1.4$  Hz, 1H), 7.38-7.34 (m, 5H), 7.30 – 7.26 (m, 1H), 7.20 (dd,  $J = 8.9, 2.5$  Hz, 1H), 4.62 – 4.54 (m, 1H), 4.50 (t,  $J = 8.5$  Hz, 1H), 4.23 (dd,  $J = 8.6, 5.4$  Hz, 1H), 3.88 (s, 3H), 3.19 – 3.08 (m, 2H);  $^{13}\text{C NMR}$  (126 MHz, DMSO)  $\delta$  159.7, 157.2, 137.1, 135.6, 132.5, 131.5, 131.1, 130.5, 129.9, 129.0, 128.9, 121.3, 118.5, 107.9, 74.5, 69.4, 59.5, 57.2, 38.9, 30.9; **IR** (KBr): 2924, 2254, 1653, 1486, 1221, 1027, 1002, 826, 764; **HRMS** (ESI+) calcd for  $\text{C}_{23}\text{H}_{19}\text{NO}_3$   $[\text{M}+\text{H}]^+$  : 380.1263 found: 380.1249.

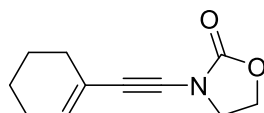

**3-(cyclohex-1-en-1-ylethynyl)oxazolidin-2-one (5t):**<sup>15</sup> Prepared according to typical procedure II. The crude product was purified by flash chromatography (EtOAc/hexanes 1:2) to afford 5t product as a colorless oil, (46 mg, 96%)  $^1\text{H NMR}$  (500 MHz,  $\text{CDCl}_3$ )  $\delta$  6.14-6.11

(m, 1H), 4.45-4.42 (m, 2H), 3.91 (dd,  $J = 8.7, 7.3$  Hz, 2H), 2.18 – 2.06 (m, 4H), 1.65 – 1.62 (m, 2H), 1.60 – 1.56 (m, 2H);  $^{13}\text{C}$  NMR (126 MHz,  $\text{CDCl}_3$ )  $\delta$  156.2, 135.6, 119.6, 76.6, 72.9, 63.0, 47.3, 29.8, 29.5, 25.8, 22.4, 21.6; IR (neat): 2923, 2311, 1636, 1464 1384, 1270, 1118, 708.

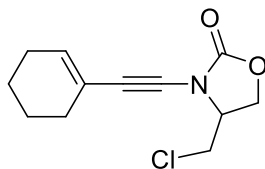

**4-(chloromethyl)-3-(cyclohex-1-en-1-ylethynyl)oxazolidin-2-one (5u):**<sup>18</sup> Prepared according to typical procedure II. The crude product was purified by flash chromatography (EtOAc/hexanes 1:2) to afford 5u product as a colorless oil, (54 mg, 90%)  $^1\text{H}$  NMR (500 MHz,  $\text{CDCl}_3$ )  $\delta$  6.17 – 6.10 (m, 1H), 4.88 – 4.78 (m, 1H), 4.01 (t,  $J = 9.0$  Hz, 1H), 3.81 (dd,  $J = 9.3, 5.8$  Hz, 1H), 3.75 – 3.68 (m, 2H), 2.20 – 1.99 (m, 4H), 1.66 – 1.61 (m, 2H), 1.61 – 1.55 (m, 2H);  $^{13}\text{C}$  NMR (126 MHz,  $\text{CDCl}_3$ )  $\delta$  155.0, 135.8, 119.4, 76.0, 73.0, 72.6, 49.9, 44.2, 29.8, 29.4, 25.8, 22.4, 21.5; IR (neat): 2923, 2262, 1757, 1633, 1422, 1384, 1218, 1025, 746.

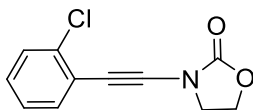

**3-(2-chlorophenylethynyl)oxazolidin-2-one (5v):** Prepared according to typical procedure II. The crude product was purified by flash chromatography (EtOAc/hexanes 1:2) to afford 5v product as a solid, (49 mg, 89%)  $^1\text{H}$  NMR (600 MHz,  $\text{CDCl}_3$ )  $\delta$  7.46 (dd,  $J = 7.0, 1.9$  Hz, 1H), 7.39 – 7.35 (m, 1H), 7.23 – 7.16 (m, 2H), 4.49 (t,  $J = 7.9$  Hz, 2H), 4.05 – 4.01 (m, 2H);  $^{13}\text{C}$  NMR (151 MHz,  $\text{CDCl}_3$ )  $\delta$  155.7, 135.5, 133.1, 129.3, 129.2, 126.6, 122.4, 84.0, 68.6, 63.3, 47.1; IR (neat): 2922, 2261, 1748, 1632, 1613, 1419, 1087, 1027, 747; HRMS (ESI+) calcd for  $\text{C}_{11}\text{H}_8\text{ClNO}_2$   $[\text{M}+\text{H}]^+$ : 222.0322 found: 222.0326.

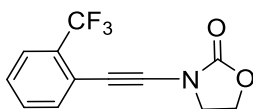

**3-(2-trifluoromethylphenylethynyl)oxazolidin-2-one (5w):** Prepared according to typical procedure II. The crude product was purified by flash chromatography (EtOAc/hexanes 1:2) to afford 5w product as a yellow oil (52 mg, 81%)  $^1\text{H}$  NMR (600 MHz,  $\text{CDCl}_3$ )  $\delta$  7.62 (d,  $J = 7.9$  Hz, 1H), 7.57 (d,  $J = 7.7$  Hz, 1H), 7.46 (t,  $J = 7.6$  Hz, 1H), 7.36 (t,  $J = 7.7$  Hz, 1H), 4.52 – 4.48

(m, 2H), 4.05 – 4.00 (m, 2H);  $^{13}\text{C}$  NMR (151 MHz,  $\text{CDCl}_3$ )  $\delta$  155.5, 133.3, 131.6, 130.9 (q,  $J = 30.4$  Hz), 127.7, 125.9 (q,  $J = 4.5$  Hz), 123.7 (q,  $J = 273.2$  Hz), 120.8, 84.5, 68.3, 63.3, 46.9; IR (neat): 2925, 2262, 1768, 1481, 1415, 1317, 1260, 1168, 1112, 1033, 768, 746; HRMS (ESI+) calcd for  $\text{C}_{12}\text{H}_8\text{F}_3\text{NO}_2$   $[\text{M}+\text{Na}]^+$  : 278.0405 found: 278.0411.

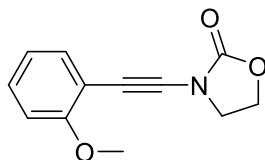

**3-(2-methoxyphenylethynyl)oxazolidin-2-one (5x):**<sup>15</sup> Prepared according to typical procedure II. The crude product was purified by flash chromatography (EtOAc/hexanes 1:2) to afford 5x product as a white solid, (46 mg, 84%)  $^1\text{H}$  NMR (500 MHz,  $\text{CDCl}_3$ )  $\delta$  7.42 (dd,  $J = 7.5, 1.5$  Hz, 1H), 7.29 (m, 1H), 6.90 (t,  $J = 7.5$  Hz, 1H), 6.87 (d,  $J = 8.4$  Hz, 1H), 4.52 – 4.44 (m, 2H), 4.07 – 4.00 (m, 2H), 3.88 (s, 3H);  $^{13}\text{C}$  NMR (126 MHz,  $\text{CDCl}_3$ )  $\delta$  160.0, 155.9, 133.9, 129.8, 120.4, 111.3, 110.6, 82.5, 77.3, 77.0, 76.8, 67.4, 63.0, 55.8, 47.1; IR (KBr): 2923, 2329, 1637, 1464, 1384, 1250, 1025, 617.

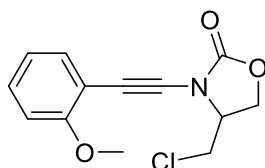

**4-(chloromethyl)-3-(2-methoxyphenylethynyl)oxazolidin-2-one (5y):** Prepared according to typical procedure II. The crude product was purified by flash chromatography (EtOAc/hexanes 1:2) to afford 5y product as a white solid, (56 mg, 85%)  $^1\text{H}$  NMR (500 MHz,  $\text{CDCl}_3$ )  $\delta$  7.42 (dd,  $J = 7.6, 1.5$  Hz, 1H), 7.32 – 7.27 (m, 1H), 6.91 (t,  $J = 7.5$  Hz, 1H), 6.87 (d,  $J = 8.4$  Hz, 1H), 4.89-4.84 (m, 1H), 4.13 (t,  $J = 9.0$  Hz, 1H), 3.93 (dd,  $J = 9.3, 5.9$  Hz, 1H), 3.88 (s, 3H), 3.78 – 3.70 (m, 2H);  $^{13}\text{C}$  NMR (126 MHz,  $\text{CDCl}_3$ )  $\delta$  160.1, 154.8, 134.0, 130.1, 120.6, 111.2, 110.7, 82.0, 72.8, 67.8, 55.9, 50.0, 44.1; IR (KBr): 2921, 2332, 2250, 1772, 1574, 1424, 1214, 1044, 986, 775; HRMS (ESI+) calcd for  $\text{C}_{13}\text{H}_{12}\text{ClNO}_3$   $[\text{M}+\text{Na}]^+$  : 288.0403 found: 288.0411.

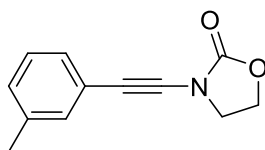

**3-(3-methylphenylethynyl)oxazolidin-2-one (5z):**<sup>13</sup> Prepared according to typical procedure II. The crude product was purified by flash chromatography (EtOAc/hexanes 1:2) to afford 5z



product as a solid, (47 mg, 94%)  $^1\text{H NMR}$  (600 MHz,  $\text{CDCl}_3$ )  $\delta$  7.27 (s, 1H), 7.24 (d,  $J = 7.8$  Hz, 1H), 7.21 – 7.17 (m, 1H), 7.12 (d,  $J = 7.6$  Hz, 1H), 4.49-4.46 (m, 2H), 4.01-3.98 (m, 2H), 2.32 (s, 3H);  $^{13}\text{C NMR}$  (151 MHz,  $\text{CDCl}_3$ )  $\delta$  156.0, 138.1, 132.3, 129.2, 128.7, 128.3, 122.0, 78.7, 71.5, 63.1, 47.2, 21.3; **IR** (KBr): 2917, 2254, 1756, 1423, 1226, 1147, 1030, 792, 746.

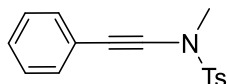

**N,4-dimethyl-N-(phenylethynyl)benzenesulfonamide (5aa):**<sup>13</sup> Prepared according to typical procedure II. The crude product was purified by flash chromatography (EtOAc/hexanes 1:2) to afford 5aa product as a solid, (57 mg, 80%),  $^1\text{H NMR}$  (600 MHz,  $\text{CDCl}_3$ )  $\delta$  7.83 (d,  $J = 8.7$  Hz, 2H), 7.38 – 7.33 (m, 4H), 7.30 – 7.26 (m, 3H), 3.14 (s, 3H), 2.45 (s, 3H);  $^{13}\text{C NMR}$  (151 MHz,  $\text{CDCl}_3$ )  $\delta$  144.9, 133.4, 131.5, 129.9, 128.4, 128.0, 122.8, 84.1, 69.2, 39.5, 21.8; **IR** (KBr): 2922, 2306, 2253, 1716, 1409, 1323, 1161, 1093, 816, 701.

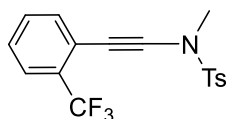

**N,4-dimethyl-N-(2-trifluoromethylphenylethynyl)benzenesulfonamide (5ab):** Prepared according to typical procedure II. The crude product was purified by flash chromatography (EtOAc/hexanes 1:2) to afford 5ab product as a solid, (63 mg, 71%),  $^1\text{H NMR}$  (600 MHz,  $\text{CDCl}_3$ )  $\delta$  7.84 (d,  $J = 8.2$  Hz, 2H), 7.60 (d,  $J = 7.9$  Hz, 1H), 7.49 (d,  $J = 7.7$  Hz, 1H), 7.44 (t,  $J = 7.6$  Hz, 1H), 7.38 – 7.30 (m, 3H), 3.16 (s, 3H), 2.44 (s, 3H);  $^{13}\text{C NMR}$  (151 MHz,  $\text{CDCl}_3$ )  $\delta$  145.1, 133.6, 133.1, 131.5, 130.5 (d,  $J = 30.3$  Hz), 130.0, 127.9, 127.3, 125.9 (q,  $J = 4.9$  Hz), 123.7 (d,  $J = 273.5$  Hz), 121.5, 89.6, 66.0, 60.5, 39.3, 21.8; **IR** (KBr): 2923, 2241, 1606, 1362, 1318, 1165, 1029, 813, 746; **HRMS** (ESI+) calcd for  $\text{C}_{17}\text{H}_{14}\text{F}_3\text{NO}_2\text{S}$   $[\text{M}+\text{Na}]^+$  : 376.0595 found: 376.0592.

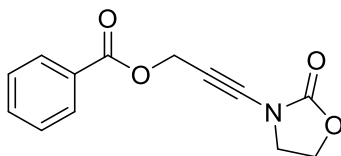

**3-(2-oxooxazolidin-3-yl)prop-2-yn-1-yl benzoate (5ac):** Prepared according to typical procedure II. The crude product was purified by flash chromatography (EtOAc/hexanes 1:2) to afford 5ac product as a colorless oil, (52 mg, 85%),  $^1\text{H NMR}$  (600 MHz,  $\text{CDCl}_3$ )  $\delta$  8.06 (d,  $J = 7.0$  Hz, 2H), 7.63 – 7.55 (m, 1H), 7.54 – 7.40 (m, 2H), 5.10 (s, 2H), 4.58 – 4.36 (m, 2H),

4.06 – 3.88 (m, 2H);  $^{13}\text{C}$  NMR (151 MHz,  $\text{CDCl}_3$ )  $\delta$  166.1, 156.1, 133.4, 129.9, 129.7, 128.6, 76.8, 66.8, 63.2, 53.1, 46.7; IR (neat): 2923, 2266, 1770, 1719, 1420, 1263, 1200, 1093, 1026, 748, 710; HRMS (ESI+) calcd for  $\text{C}_{13}\text{H}_{11}\text{NO}_4$   $[\text{M}+\text{Na}]^+$  : 268.0586 found: 268.0602.

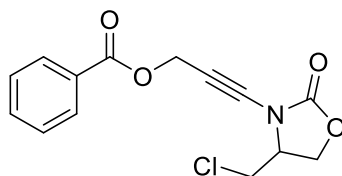

**3-(4-(3-chloromethyl)-2-oxooxazolidin-3-yl)prop-2-yn-1-yl benzoate (5ad):** Prepared according to typical procedure II. The crude product was purified by flash chromatography (EtOAc/hexanes 1:2) to afford 5ad product as a colorless oil, (59 mg, 82%),  $^1\text{H}$  NMR (600 MHz,  $\text{CDCl}_3$ )  $\delta$  8.07 (d,  $J = 7.5$  Hz, 2H), 7.58 (t,  $J = 7.4$  Hz, 1H), 7.45 (t,  $J = 7.8$  Hz, 2H), 5.09 (s, 2H), 4.86 (m, 1H), 4.05 (t,  $J = 9.1$  Hz, 1H), 3.85 (dd,  $J = 9.2, 5.8$  Hz, 1H), 3.72 (d,  $J = 5.3$  Hz, 2H);  $^{13}\text{C}$  NMR (151 MHz,  $\text{CDCl}_3$ )  $\delta$  166.1, 154.9, 133.4, 129.9, 129.6, 128.6, 76.2, 72.9, 67.0, 52.9, 49.4, 44.1; IR (neat) : 2927, 2267, 1718, 1600, 1425, 1266, 1025, 712; HRMS (ESI+) calcd for  $\text{C}_{14}\text{H}_{12}\text{ClNO}_4$   $[\text{M}+\text{Na}]^+$  : 316.0353 found: 316.0395.

## 6. $^1\text{H}$ , $^{13}\text{C}$ , & $^{31}\text{P}$ Spectra:

**Diethyl [(4-bromophenyl)ethynyl]phosphonate (3a):**

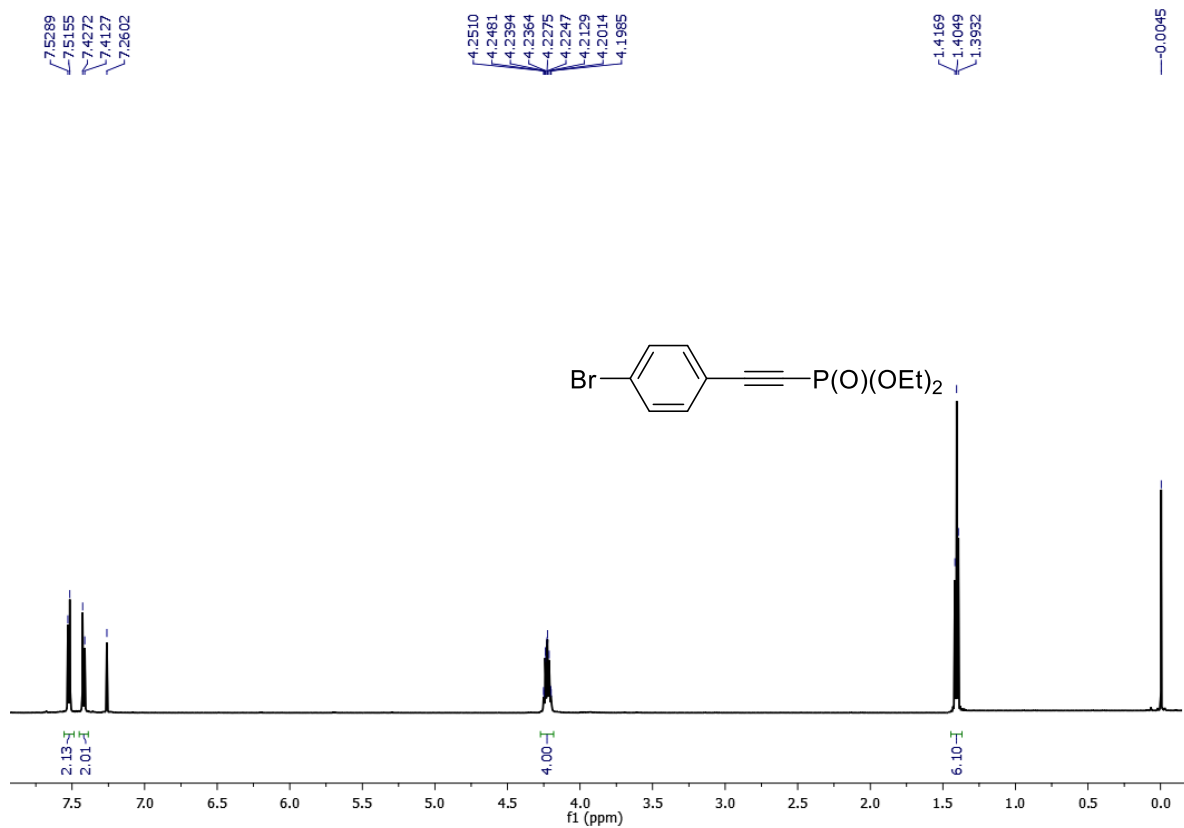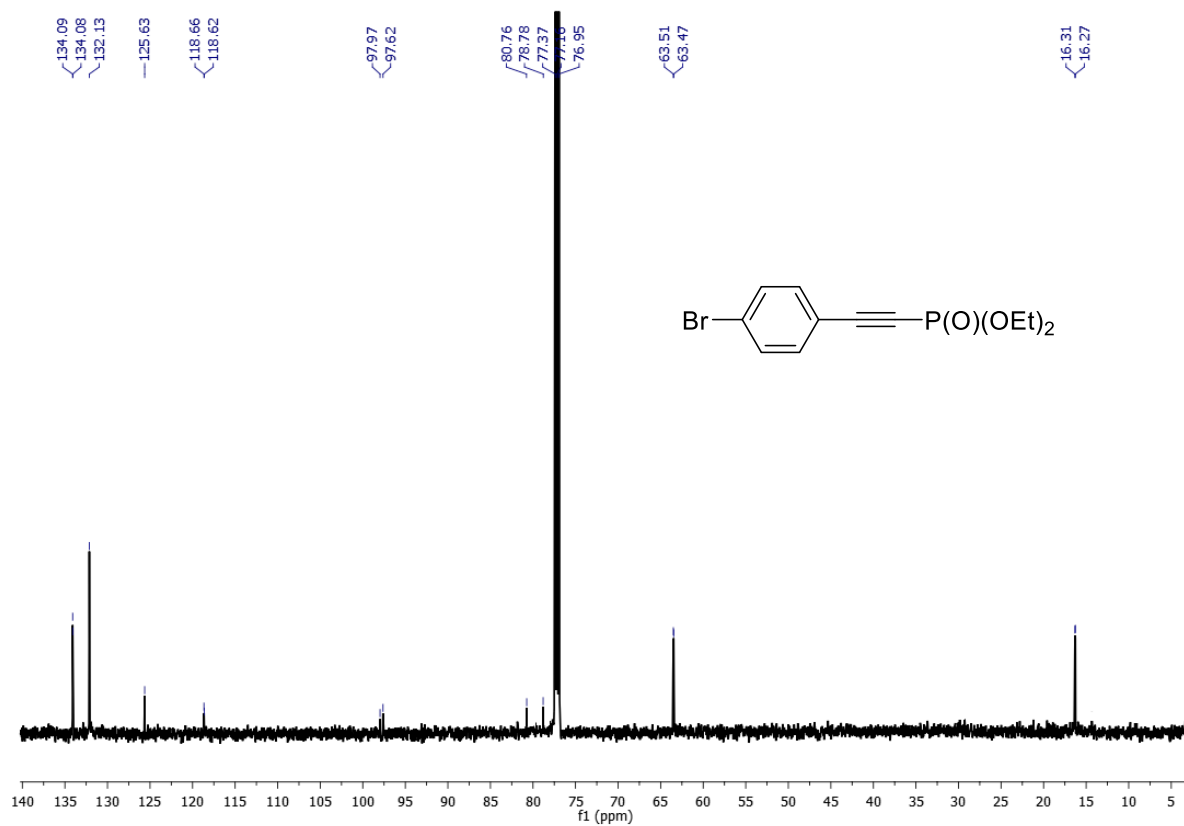

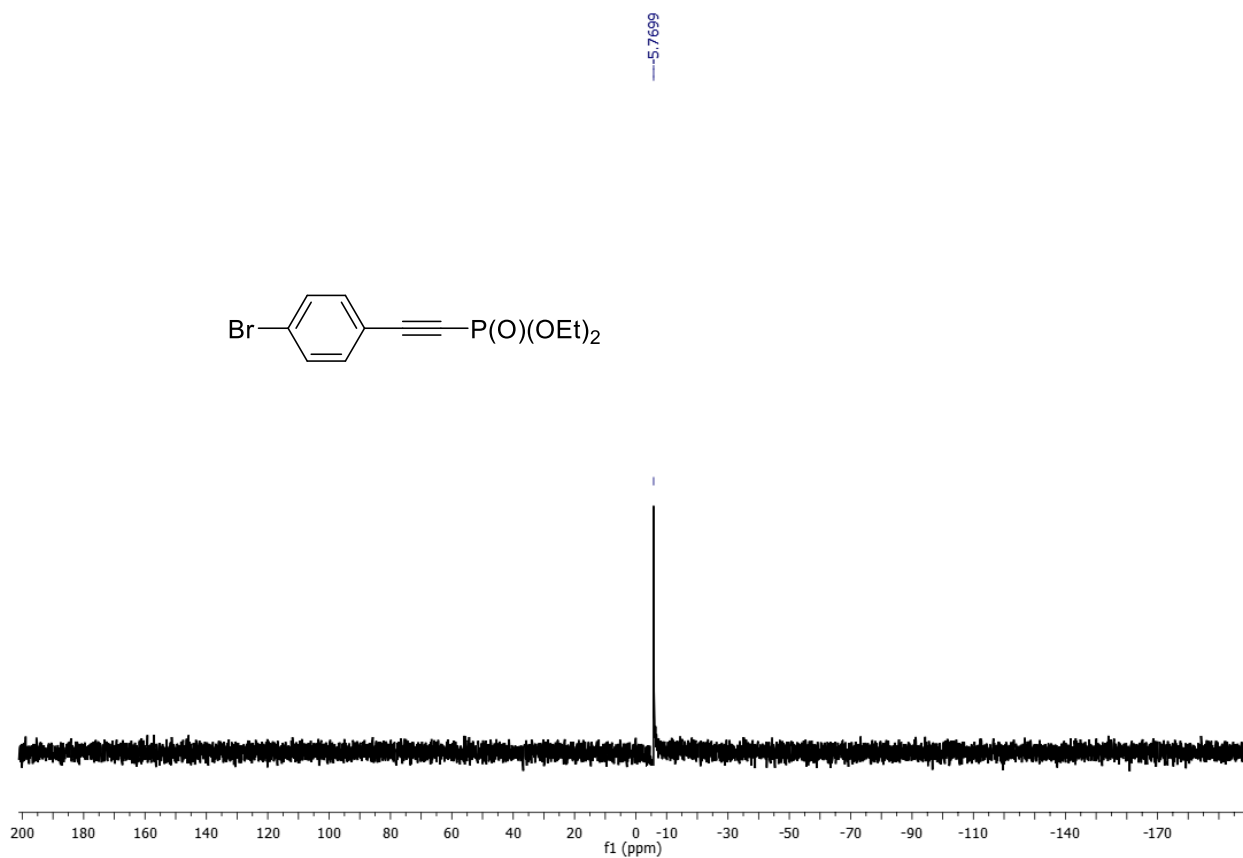

**Diethyl (phenylethynyl)phosphonate (3b):**

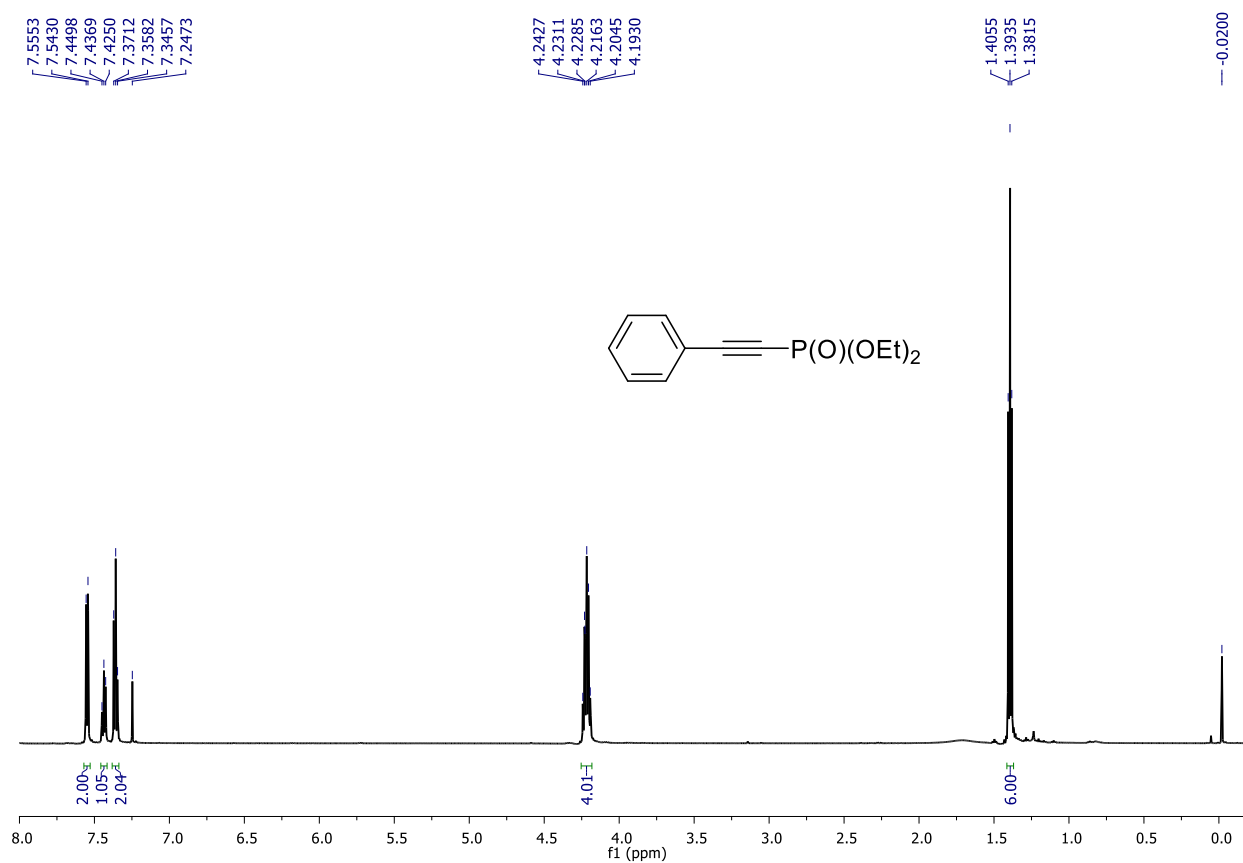

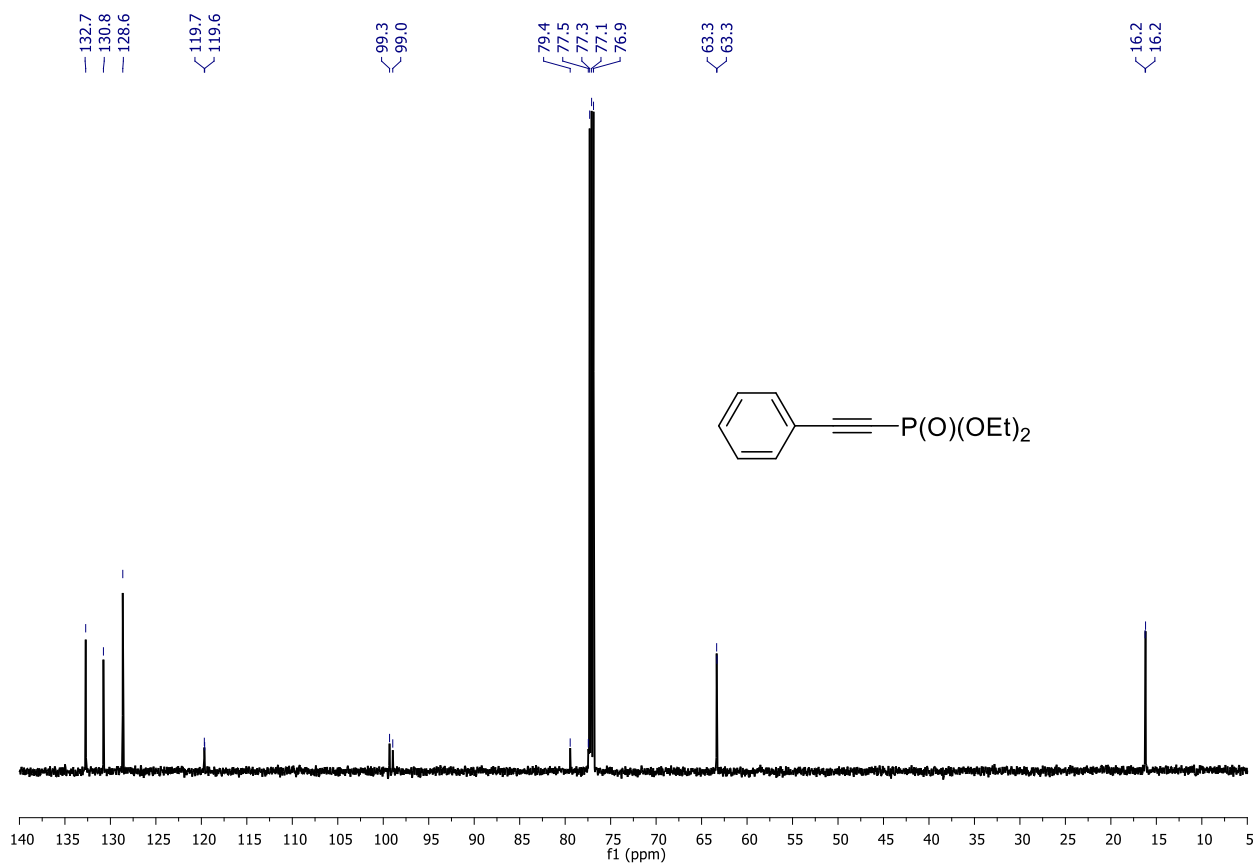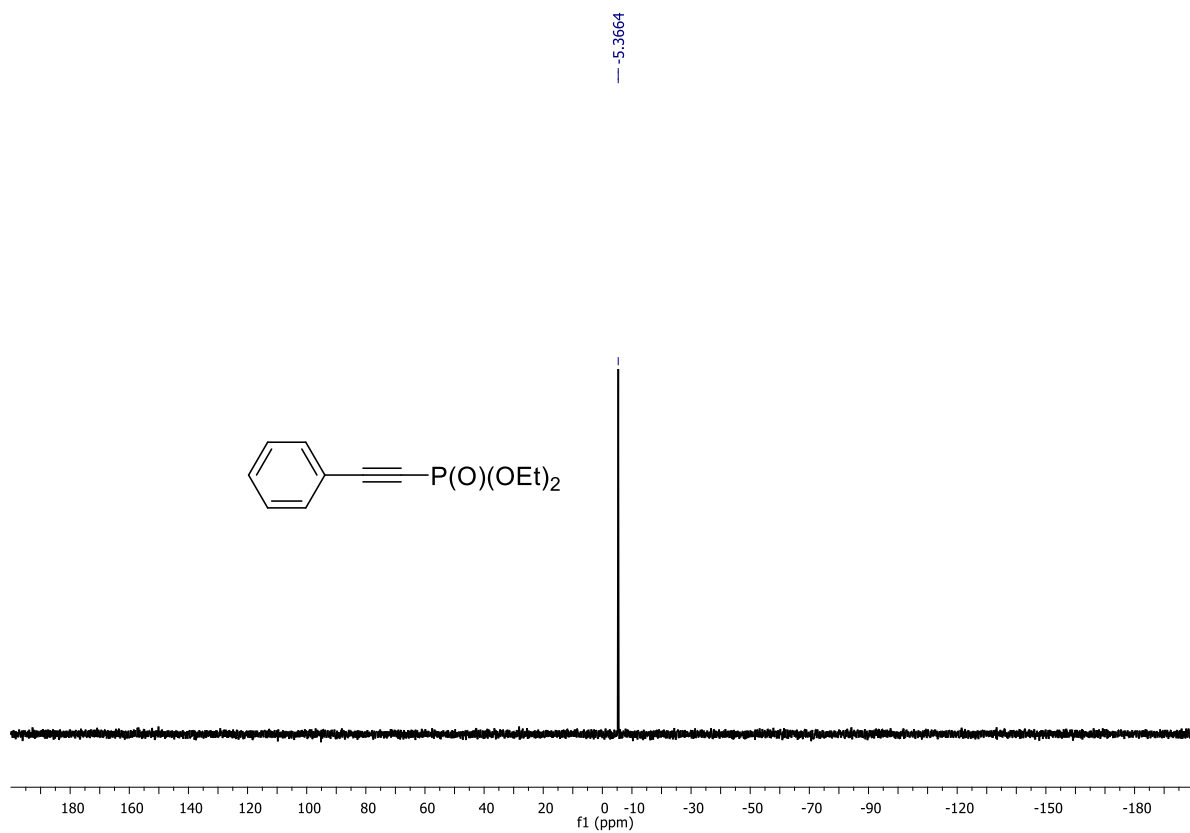

# Diethyl [(4-fluorophenyl)ethynyl]phosphonate (3c):

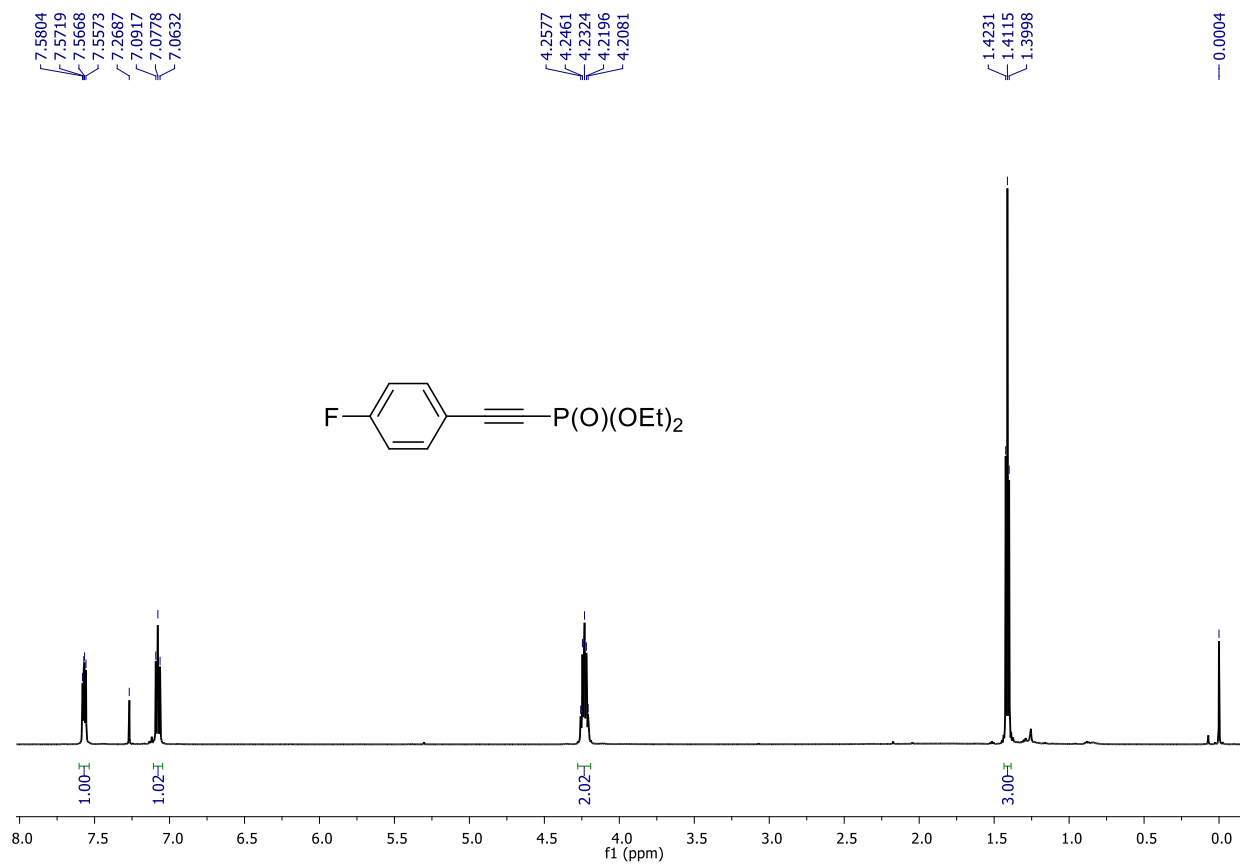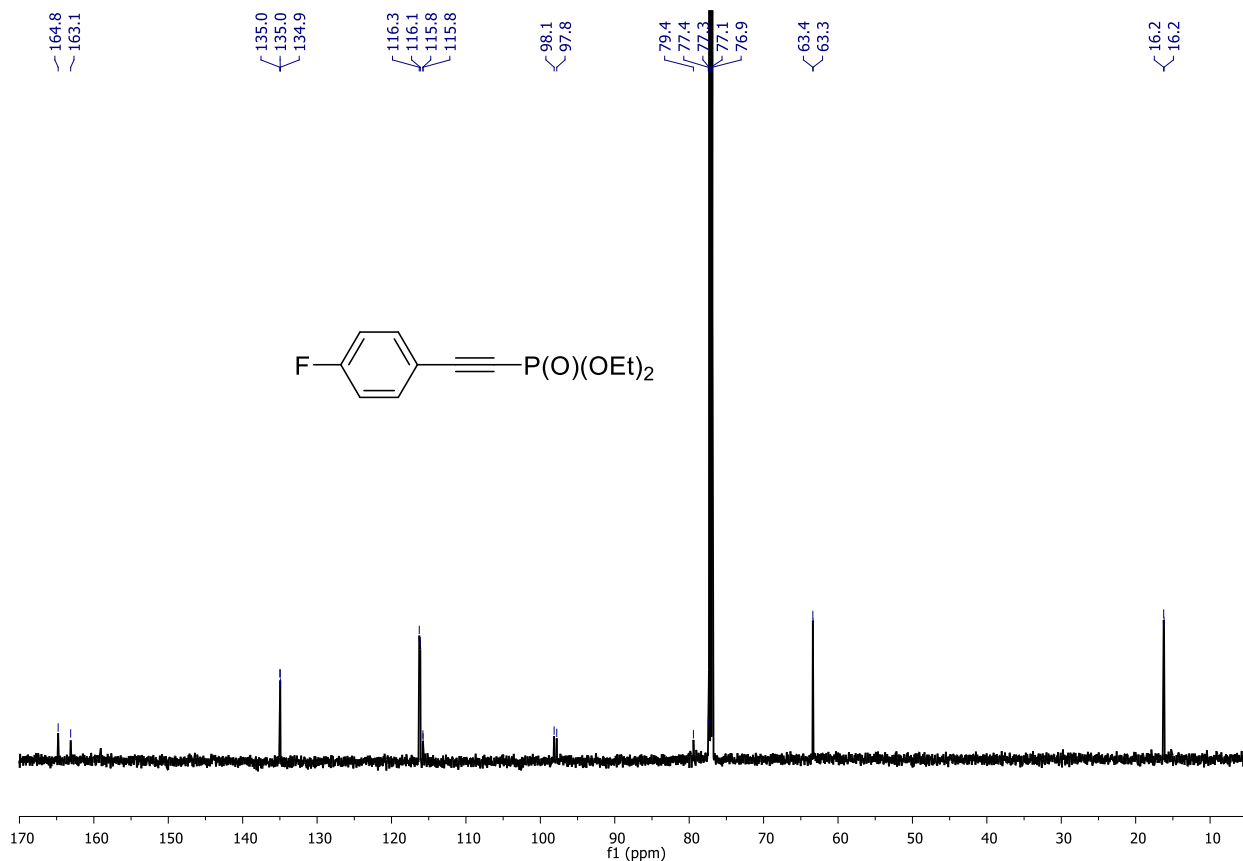

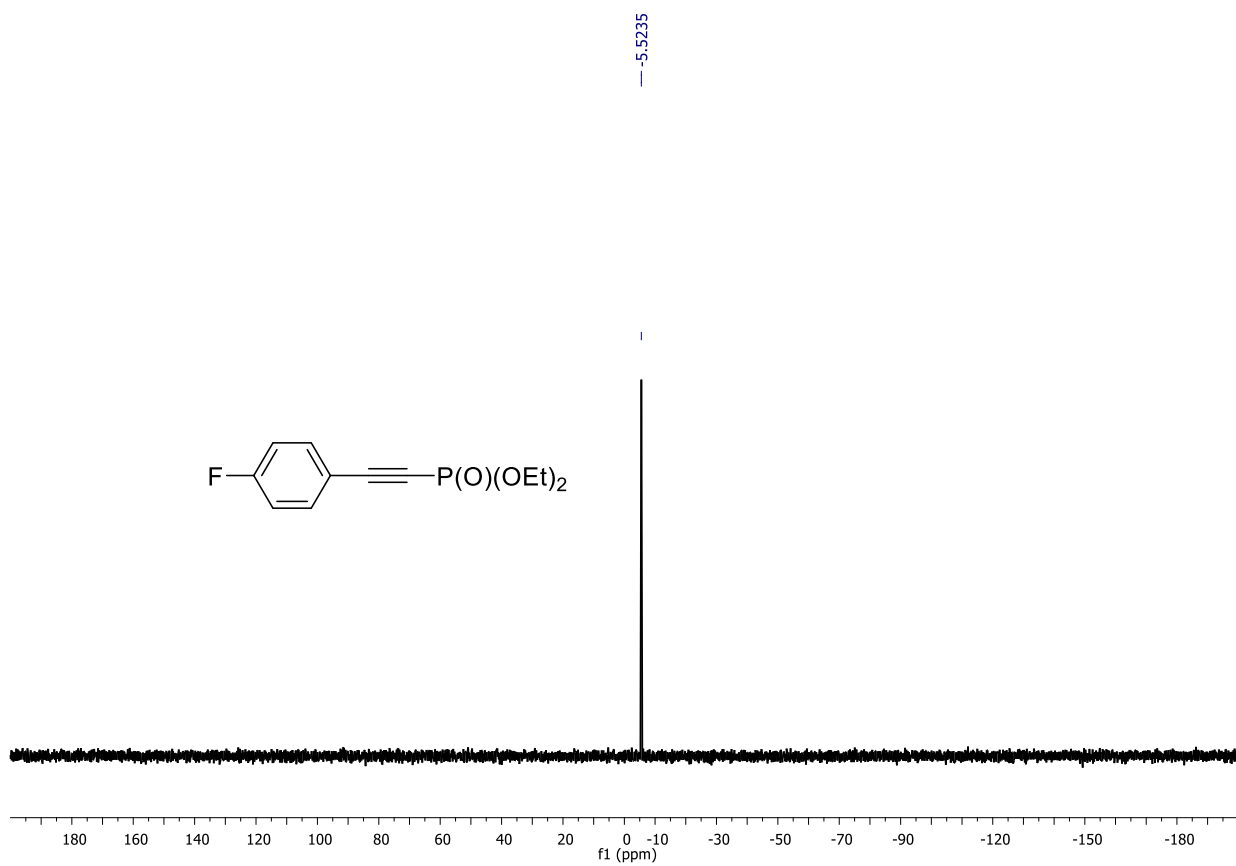

**Diethyl (4-tolyethynyl)phosphonate (3d):**

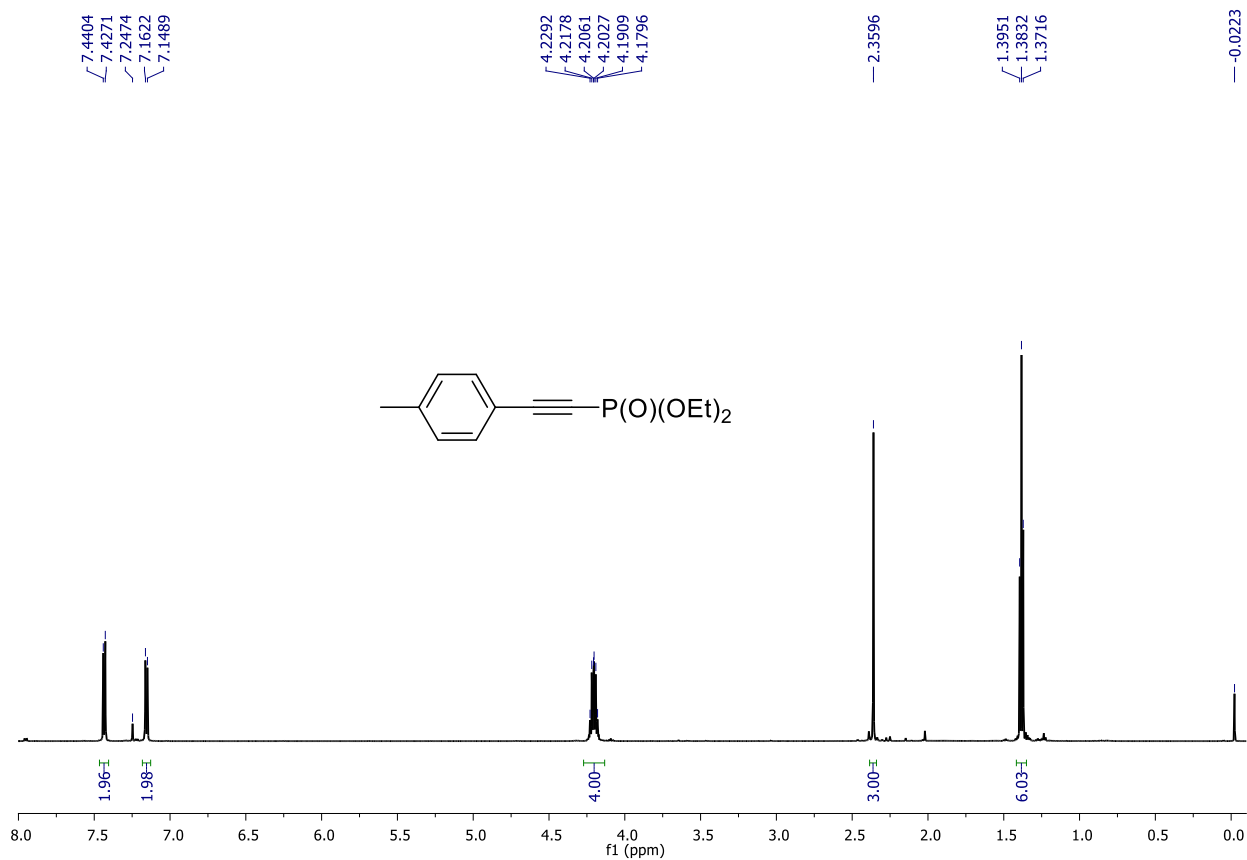

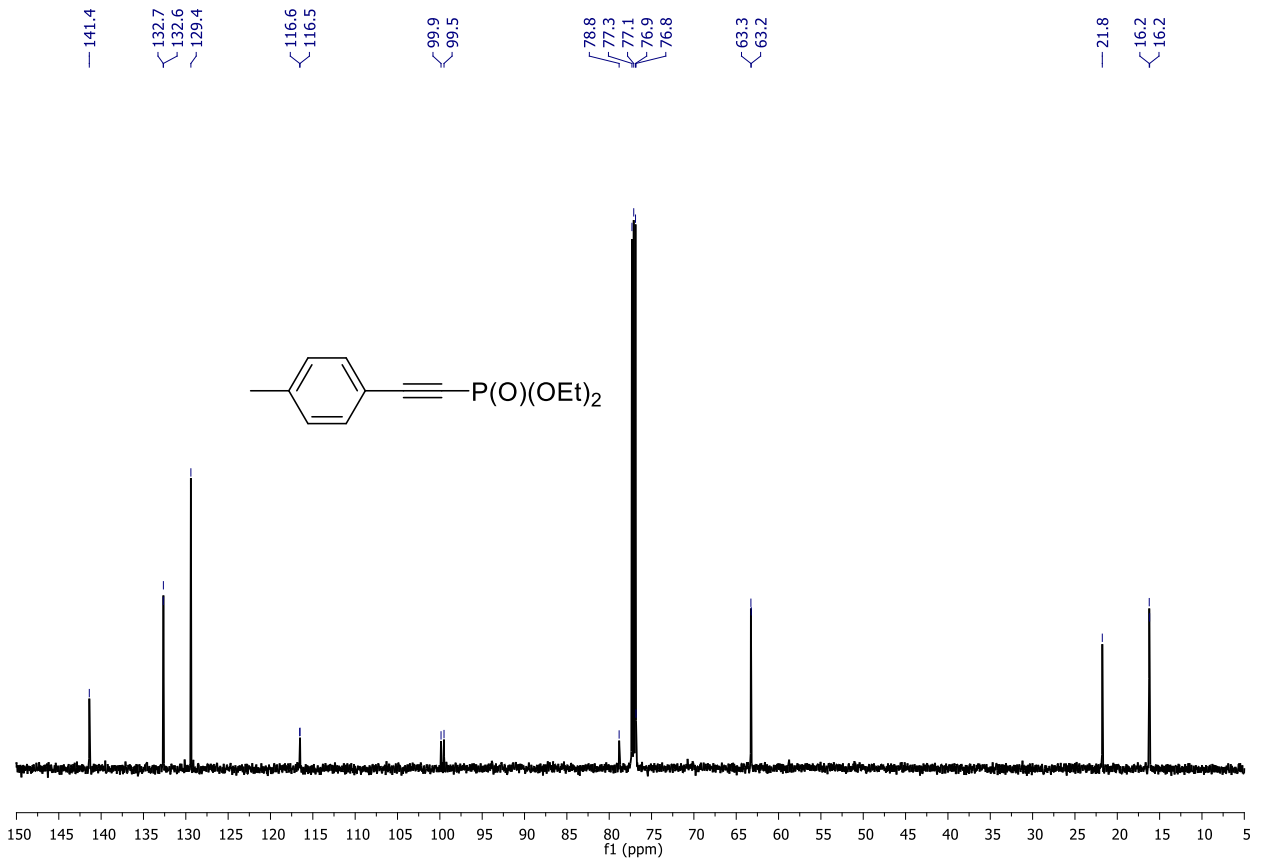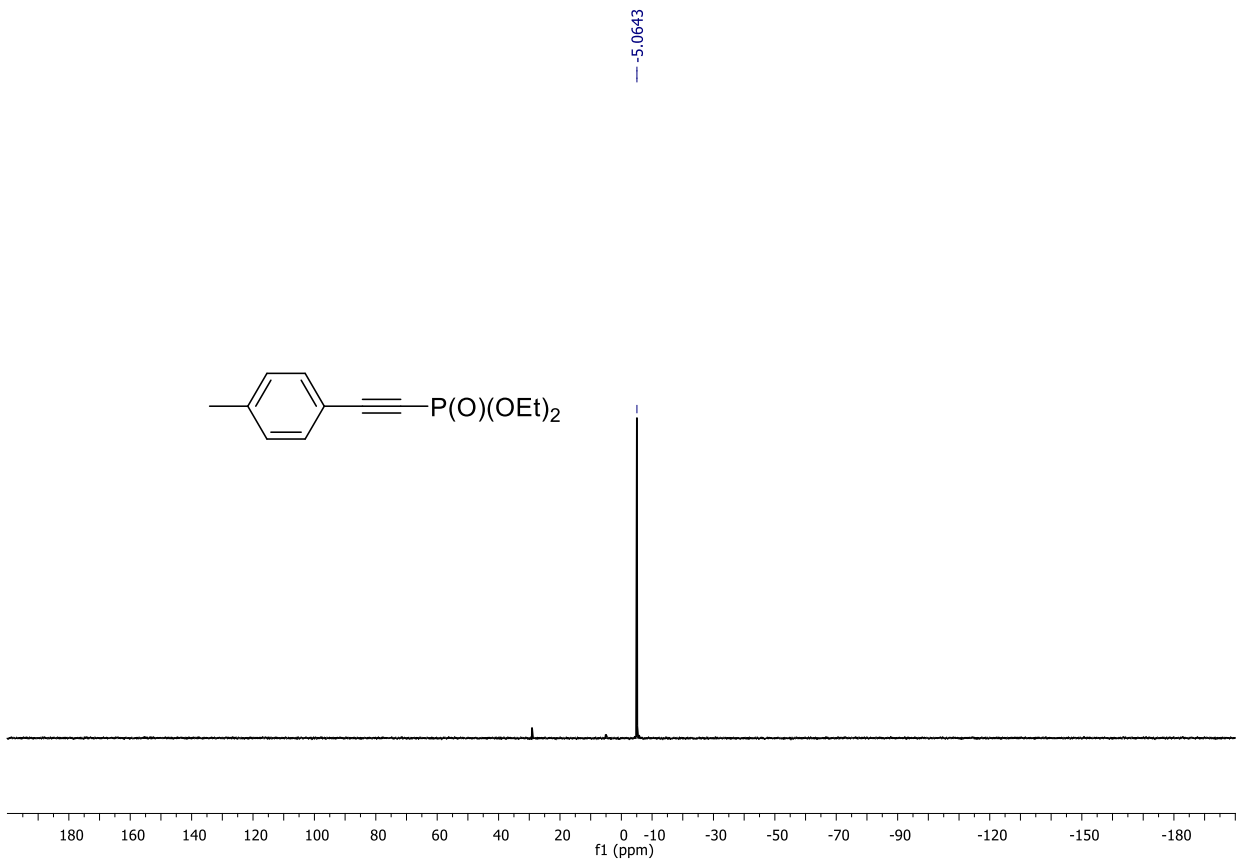



# Diethyl [(4-*tert*-butylphenyl)ethynyl]phosphonate (3e):

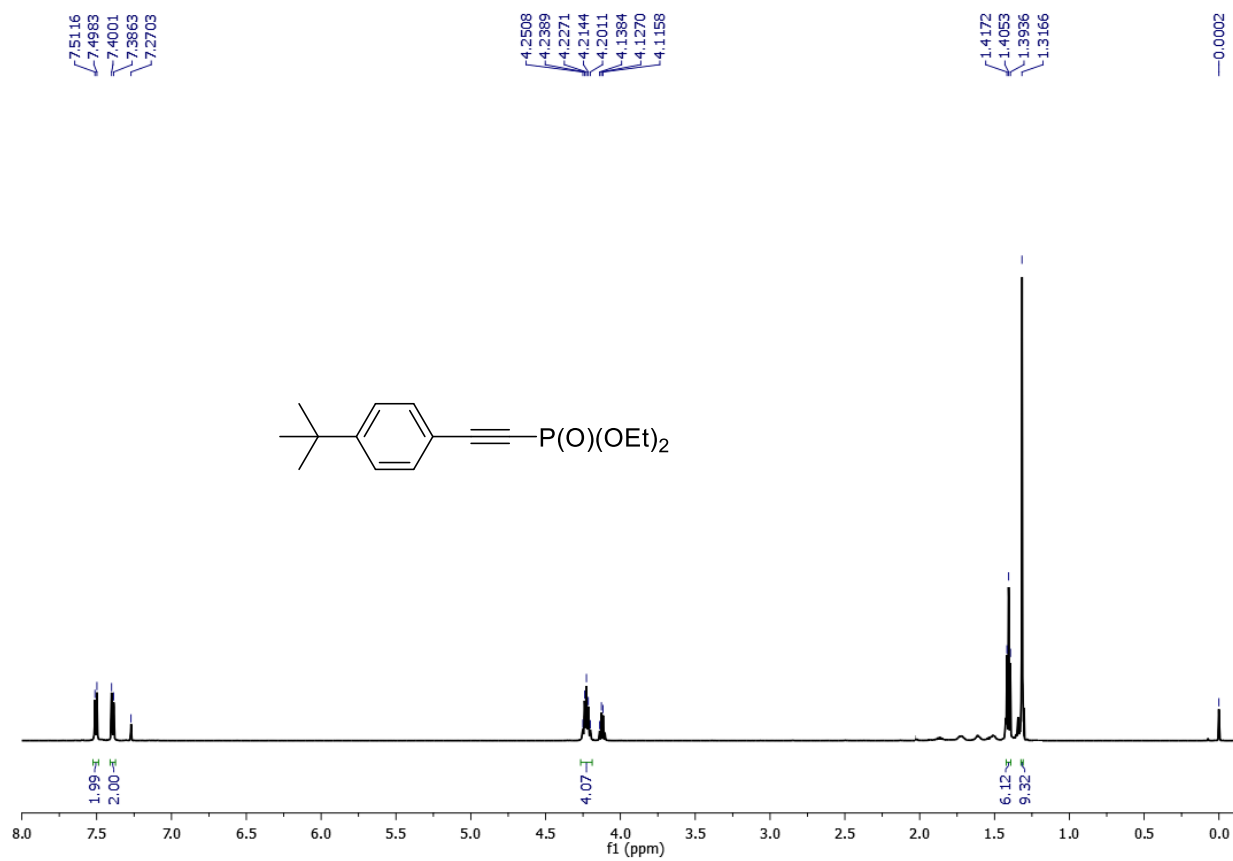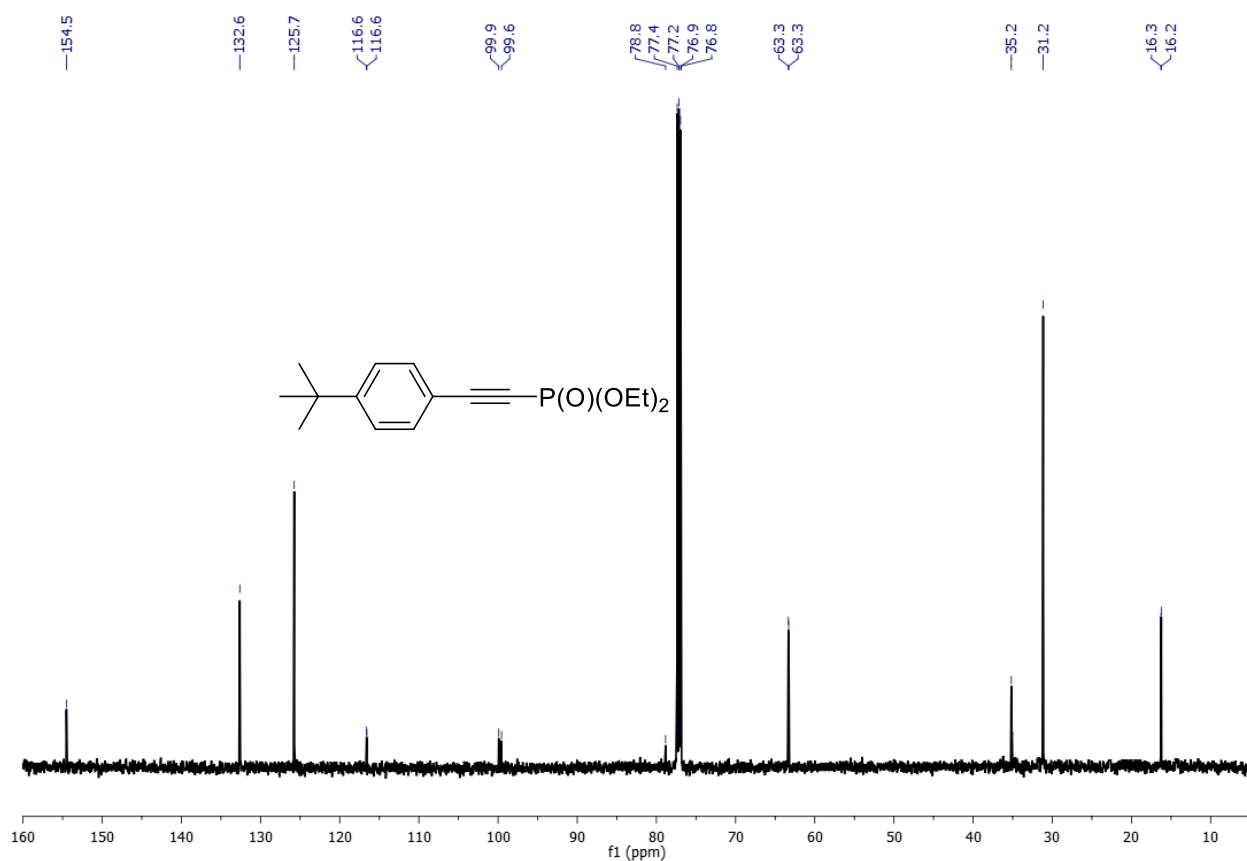

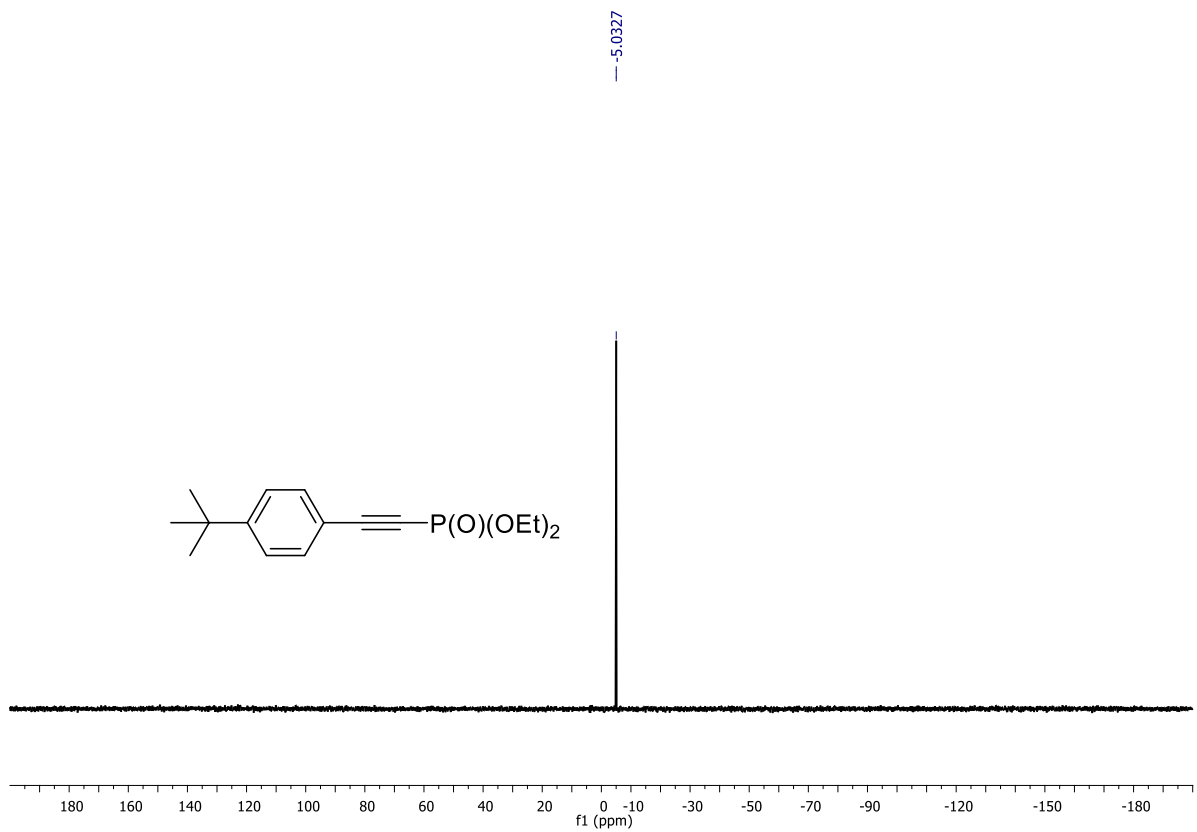

**Diethyl [(4-methoxyphenyl)ethynyl]phosphonate (3f):**

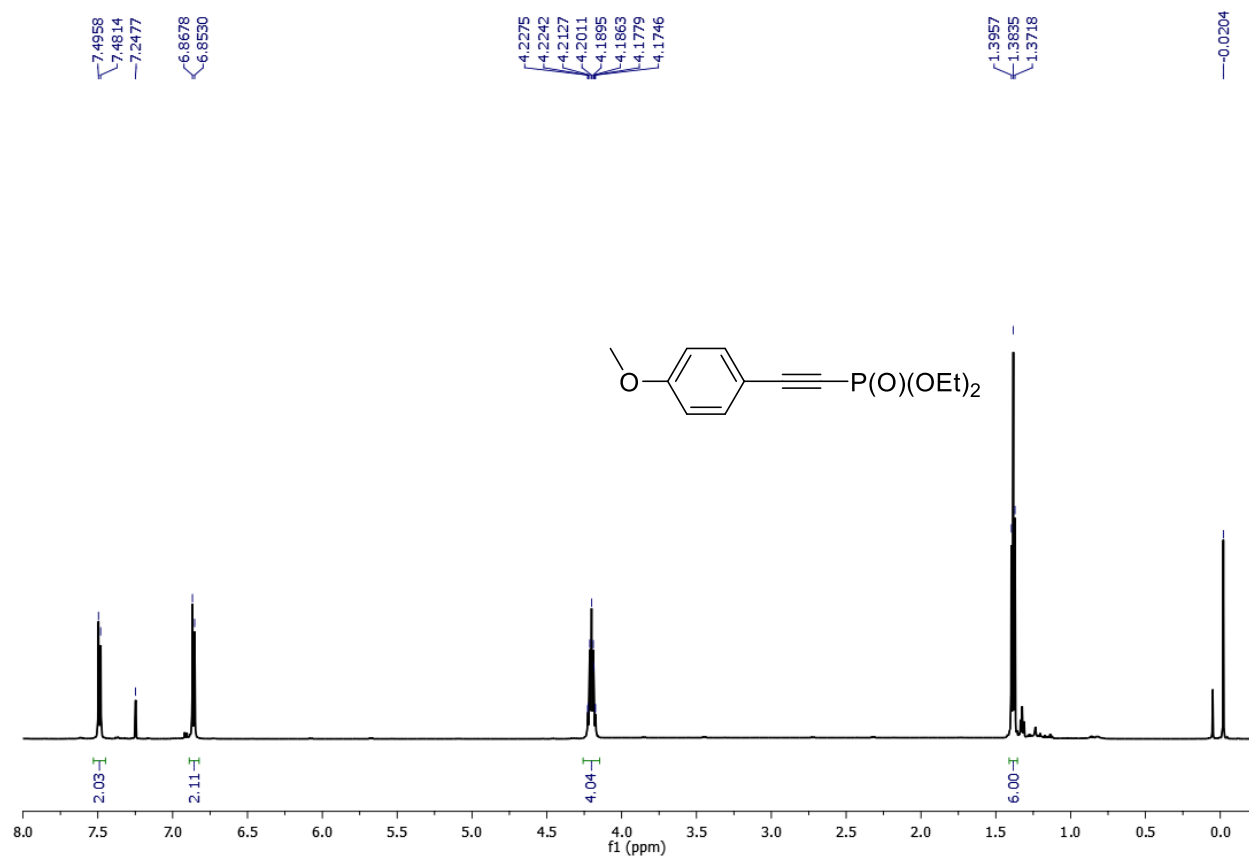

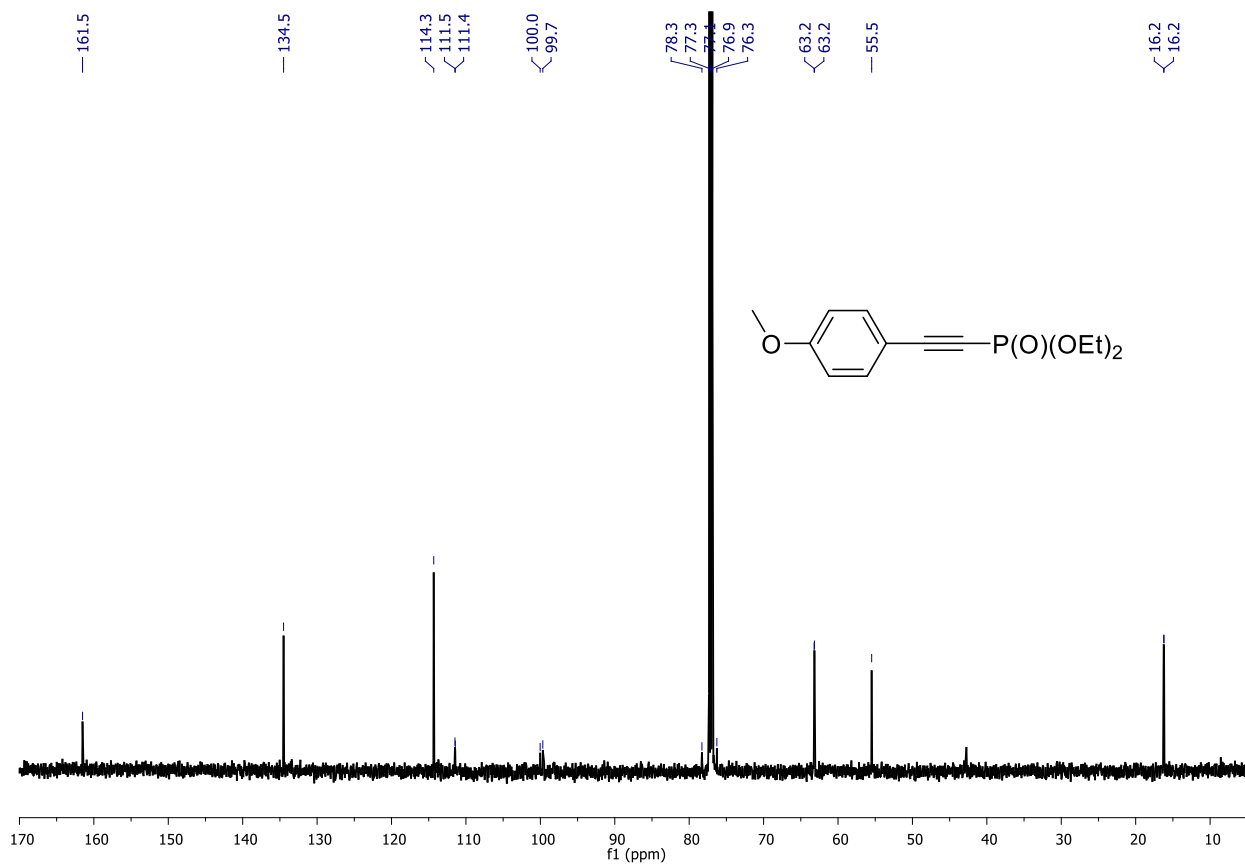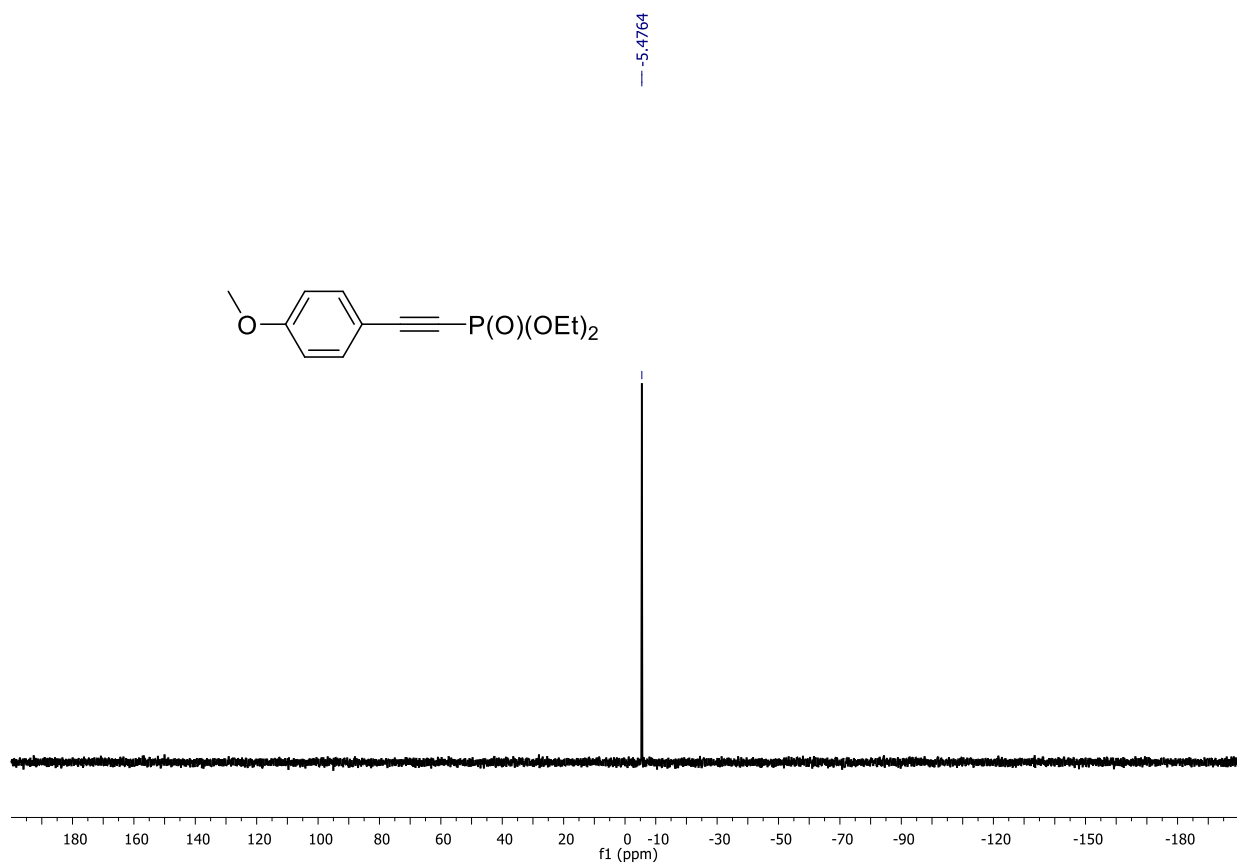

**Diethyl [(4-N,N dimethylaminophenyl)ethynyl]phosphonate (3g):**

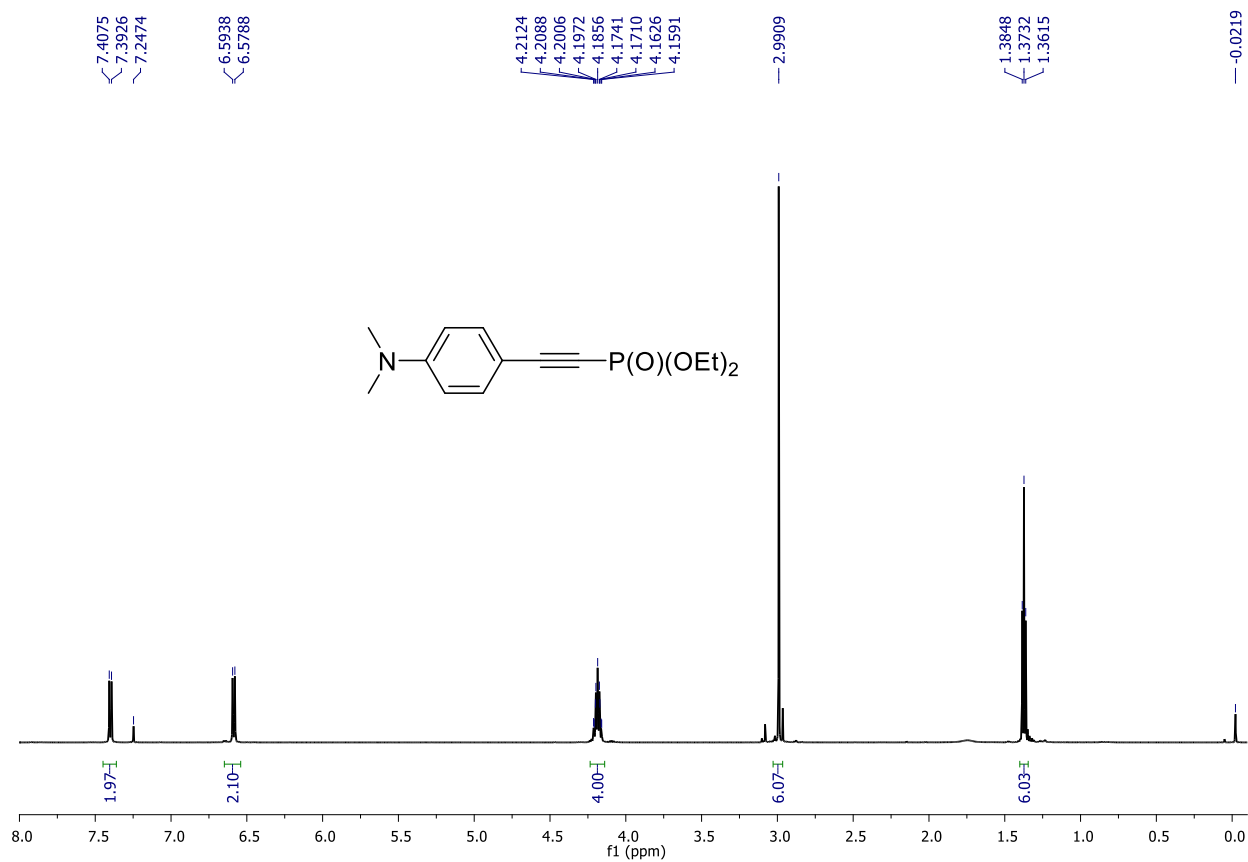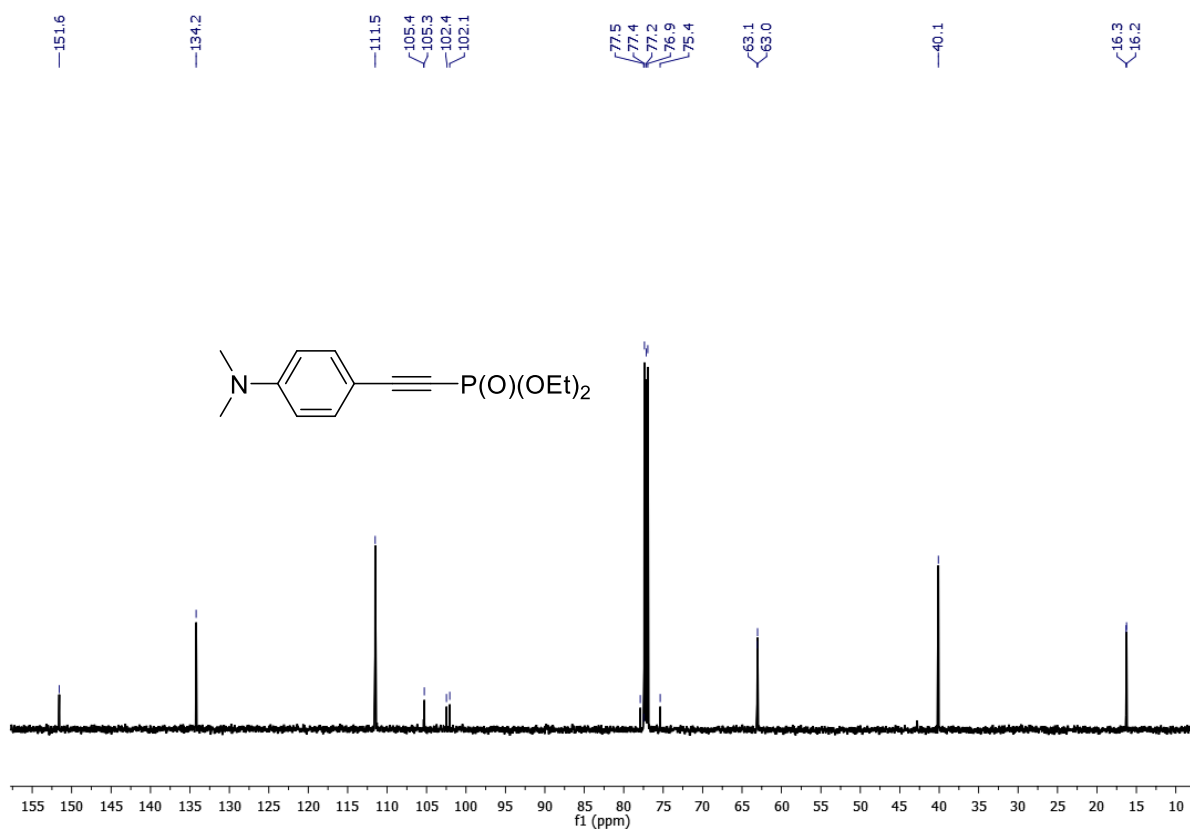

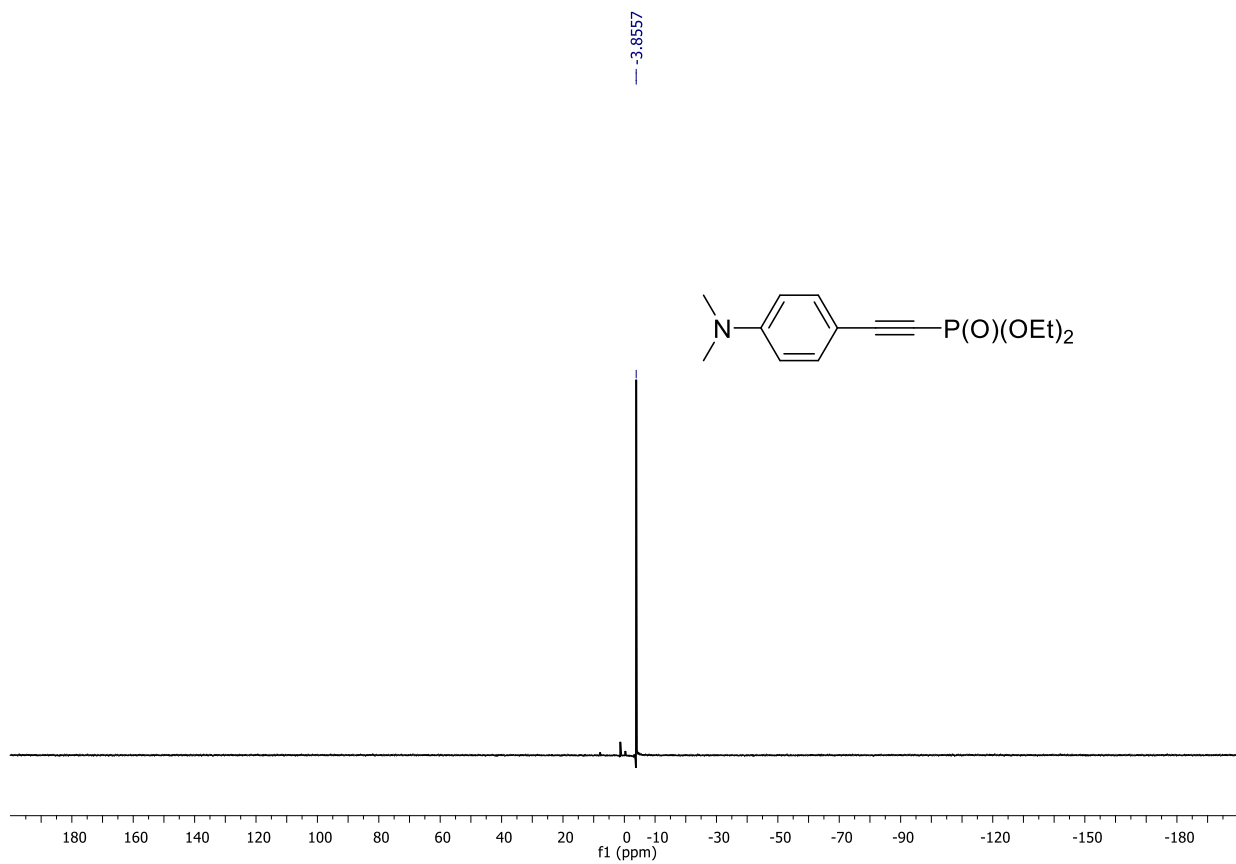

**Diethyl [(4-cyanophenyl)ethynyl]phosphonate (3h):**

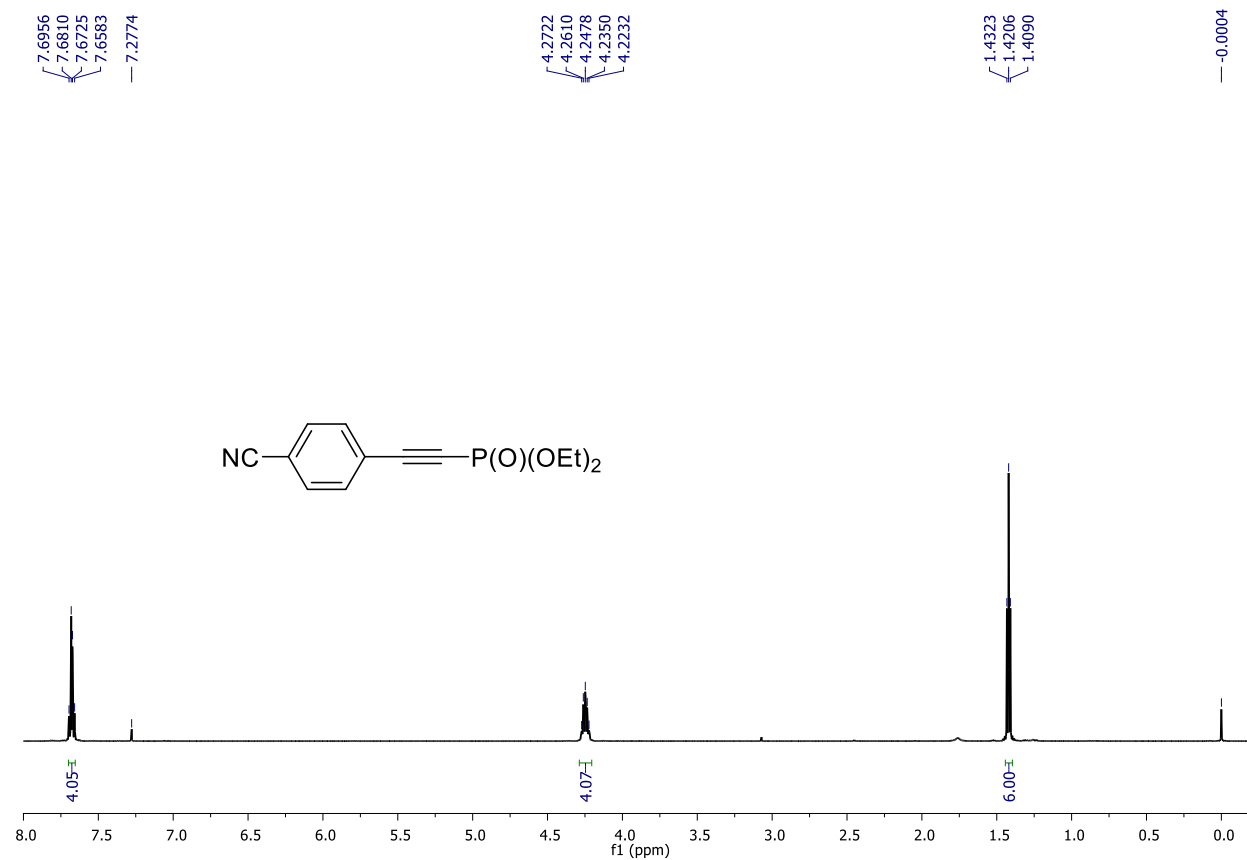

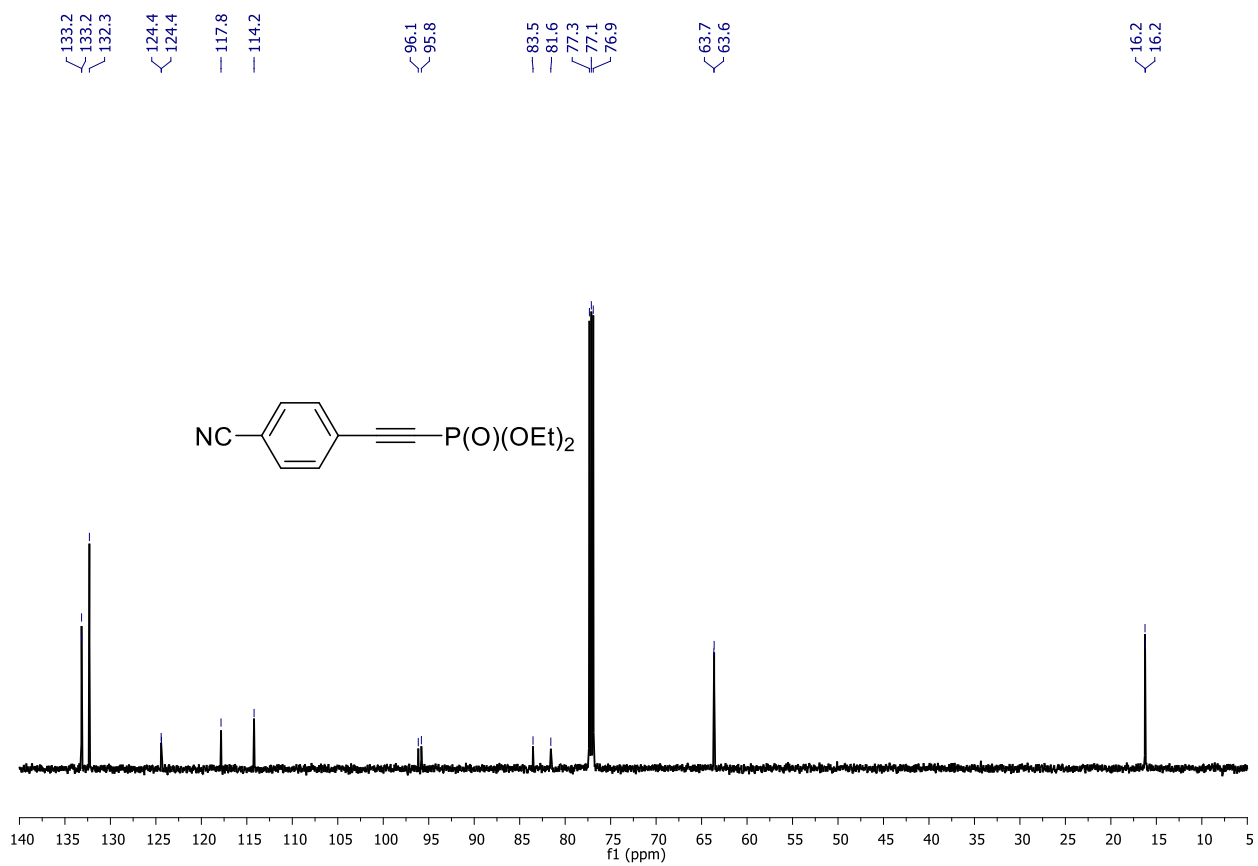

-6.6309

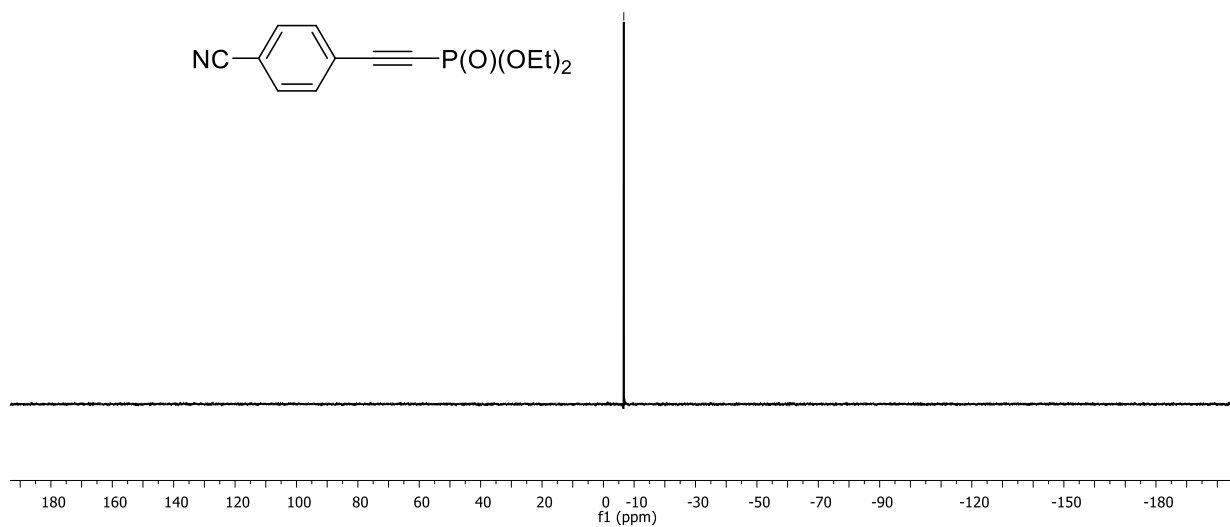

# Diethyl [(2-trifluoromethylbenzene)ethynyl]phosphonate (3i):

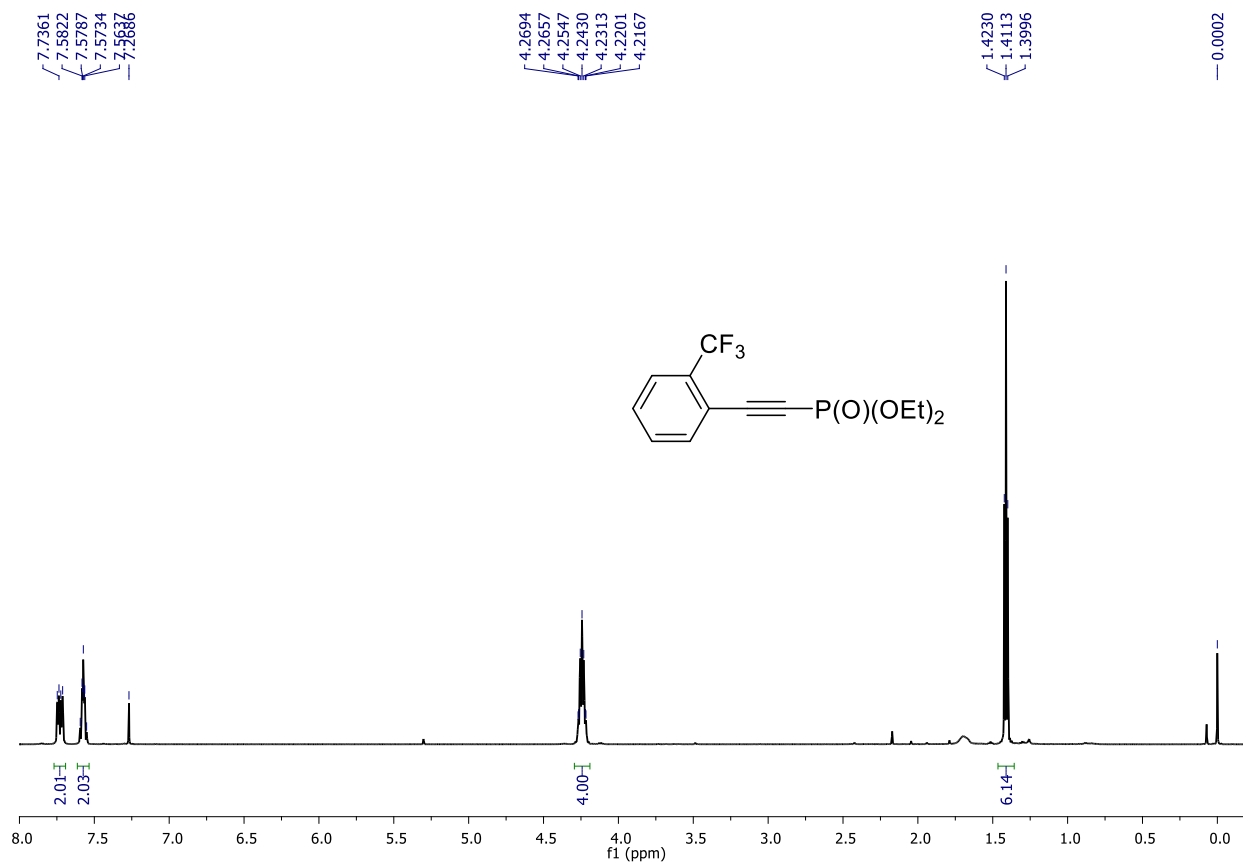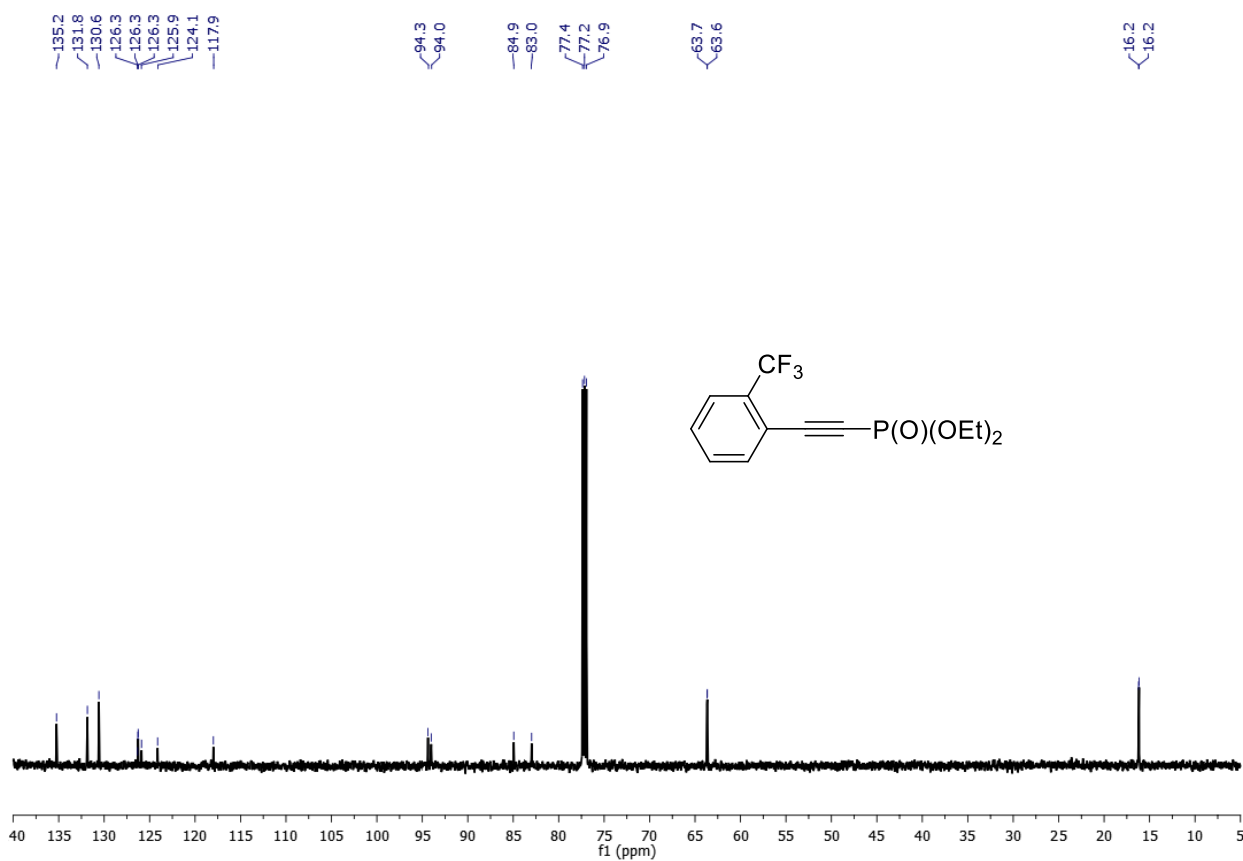

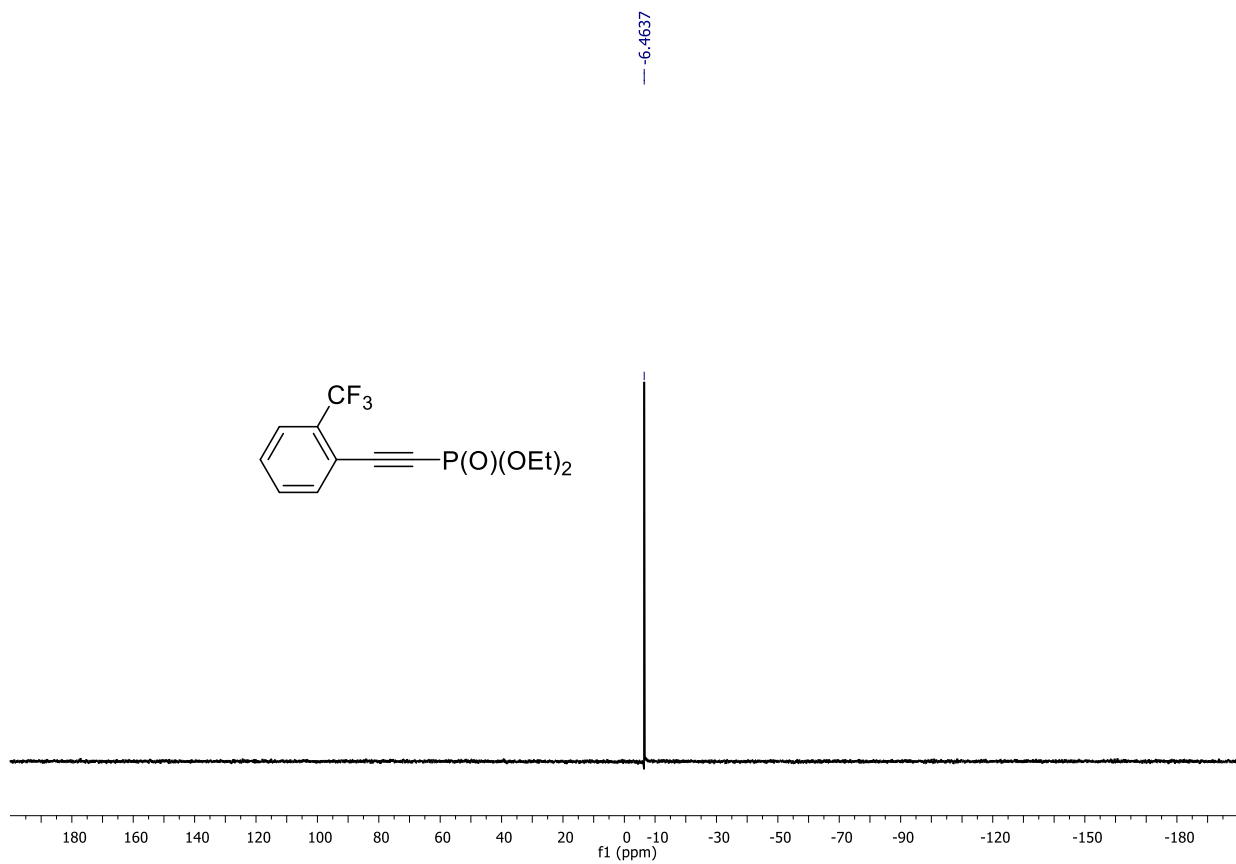

**Diethyl [(2-chlorophenyl)ethynyl]phosphonate (3j):**

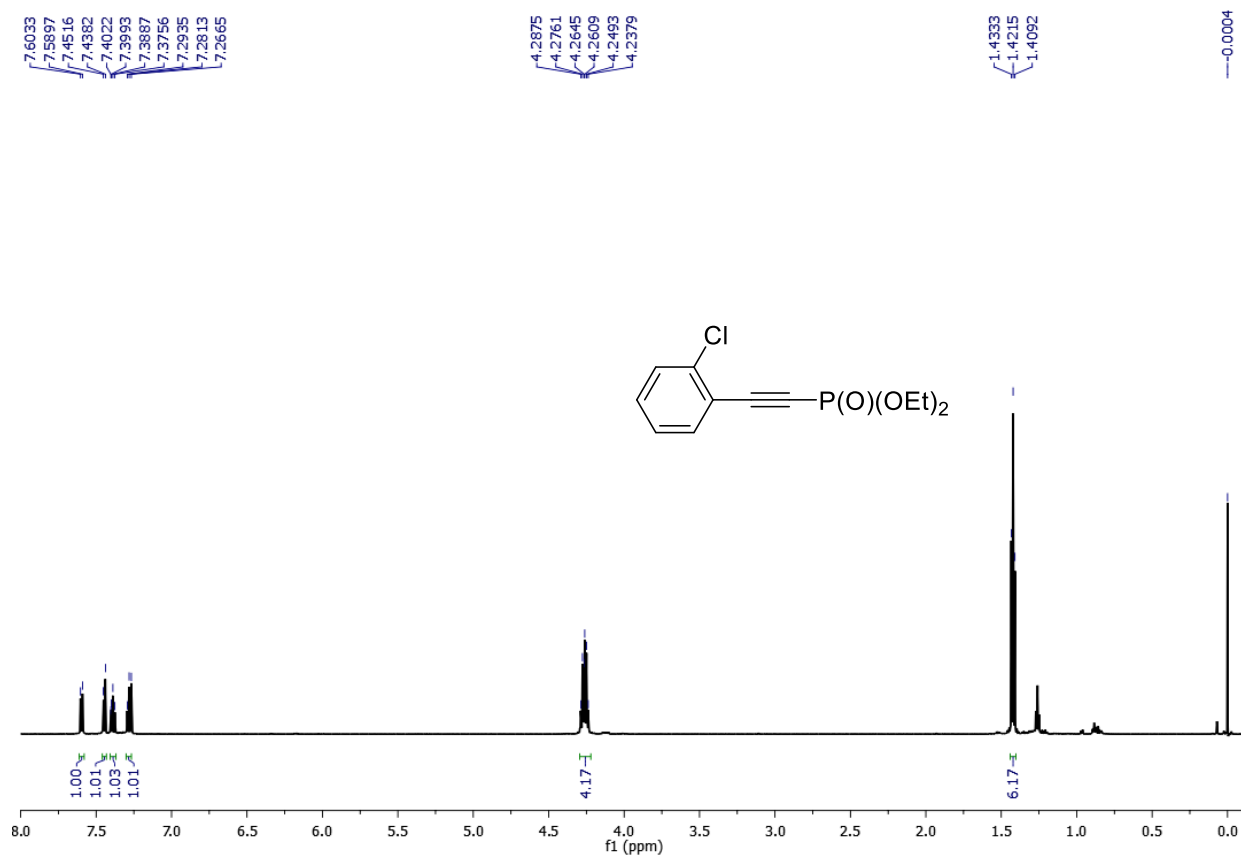



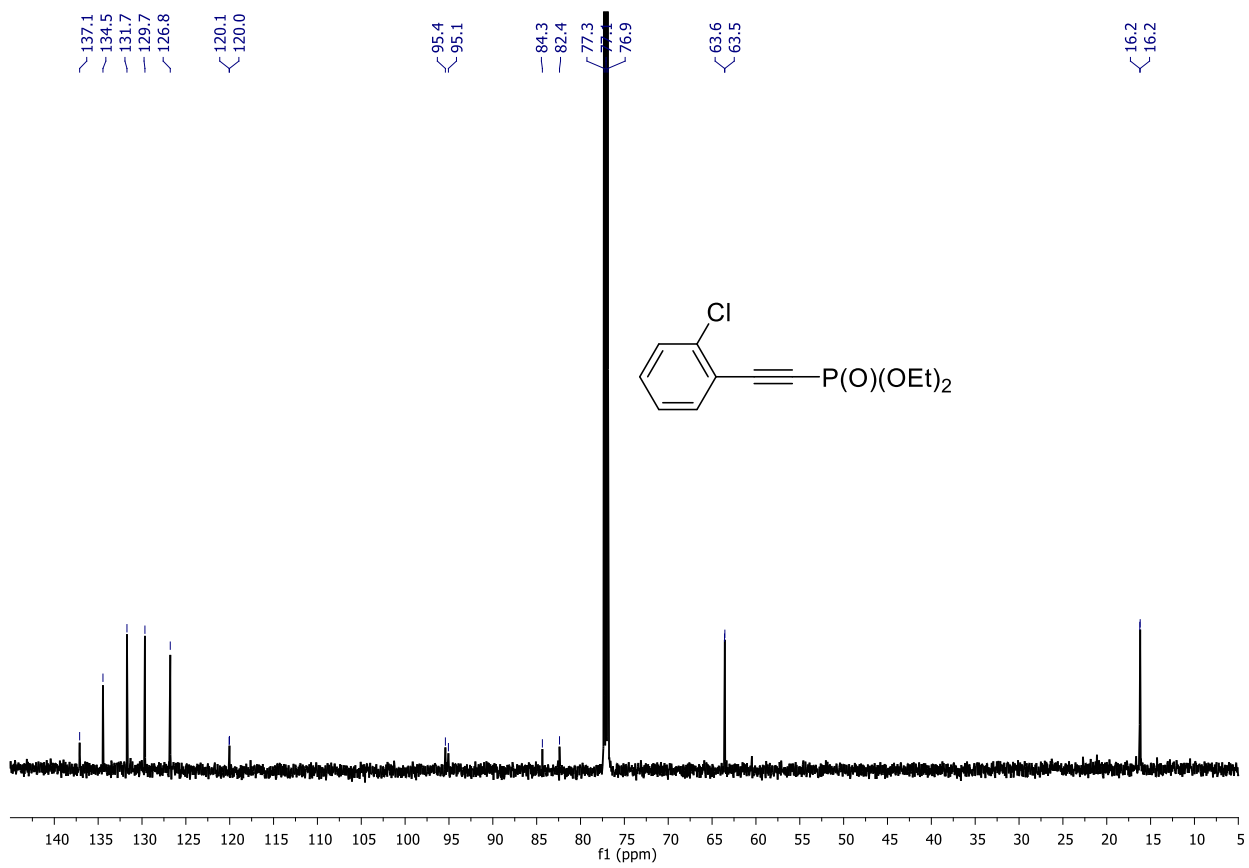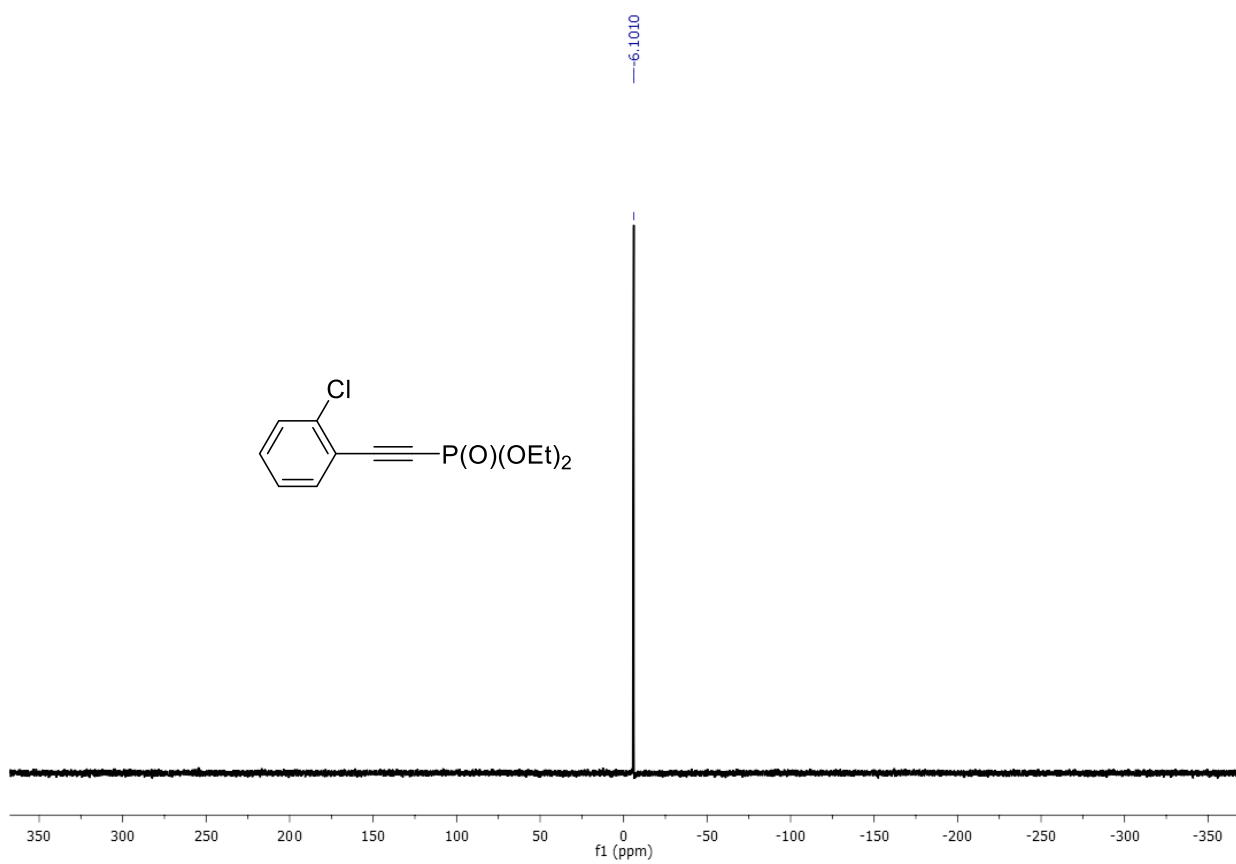

# Diethyl [(2-methoxyphenyl)ethynyl]phosphonate (3k):

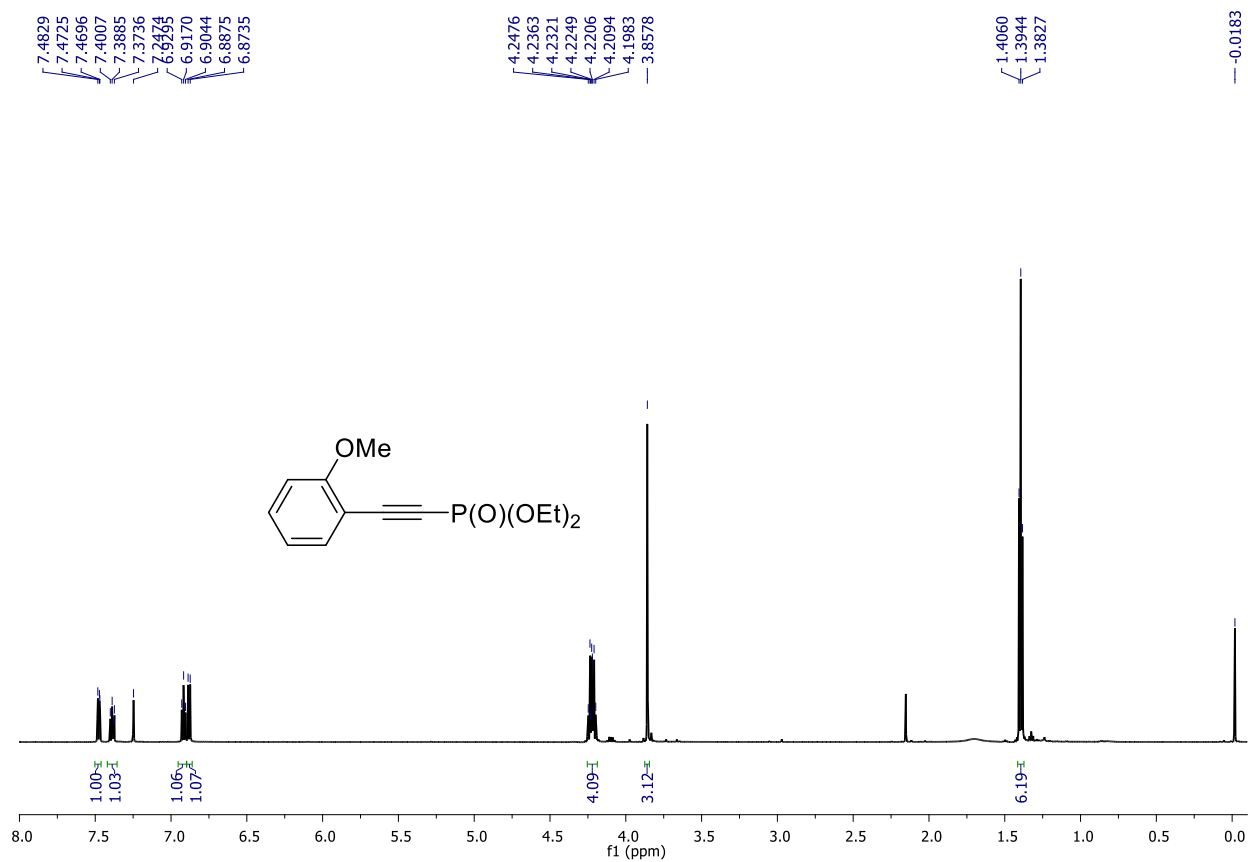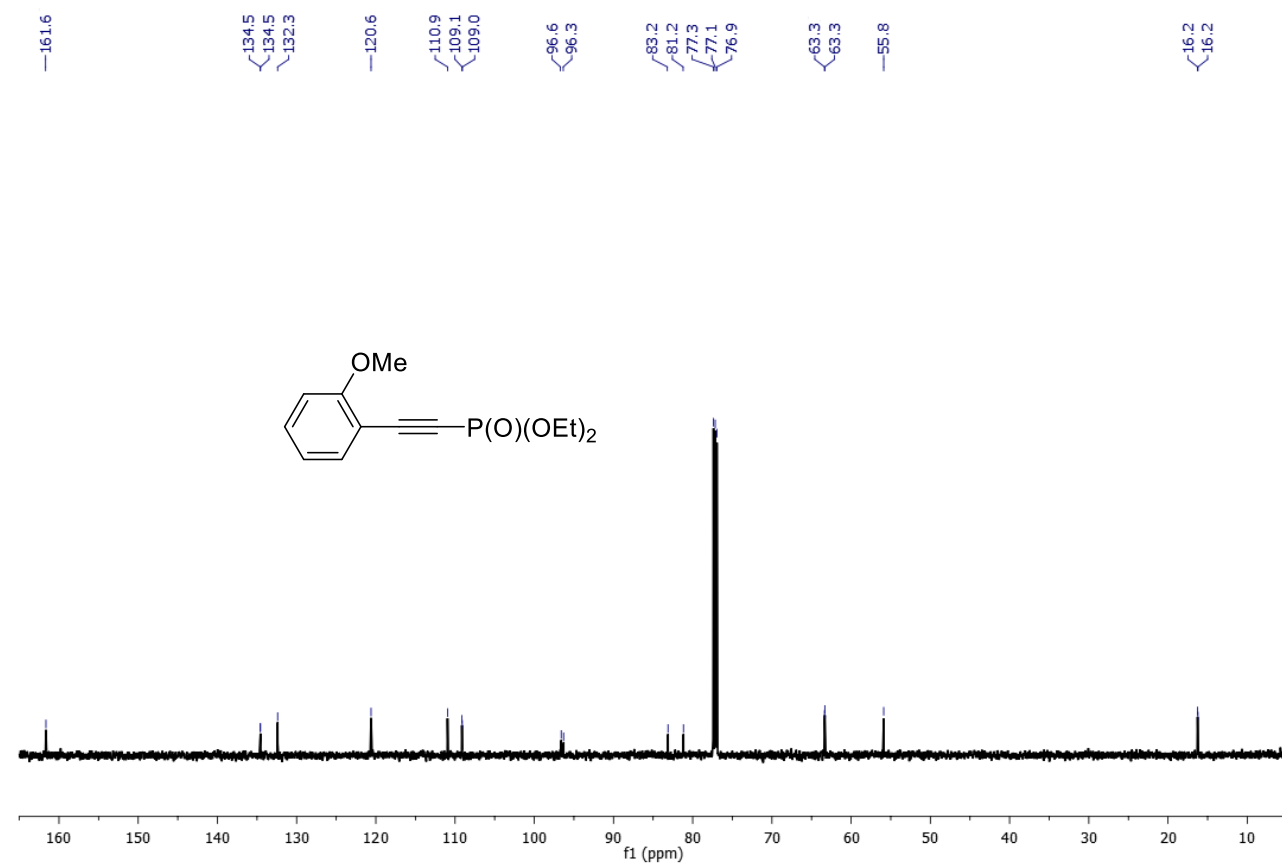

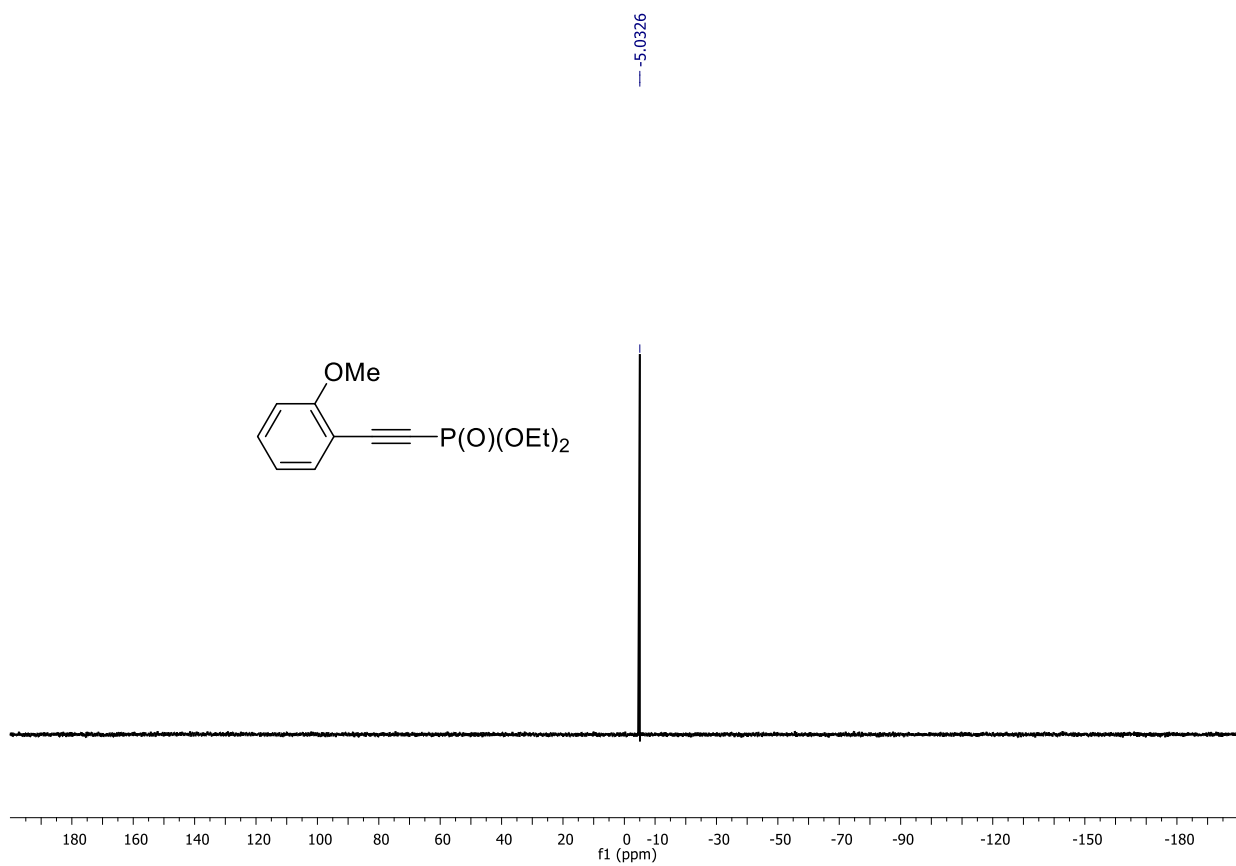

**Diethyl [(3-methylphenyl)ethynyl]phosphonate (3l):**

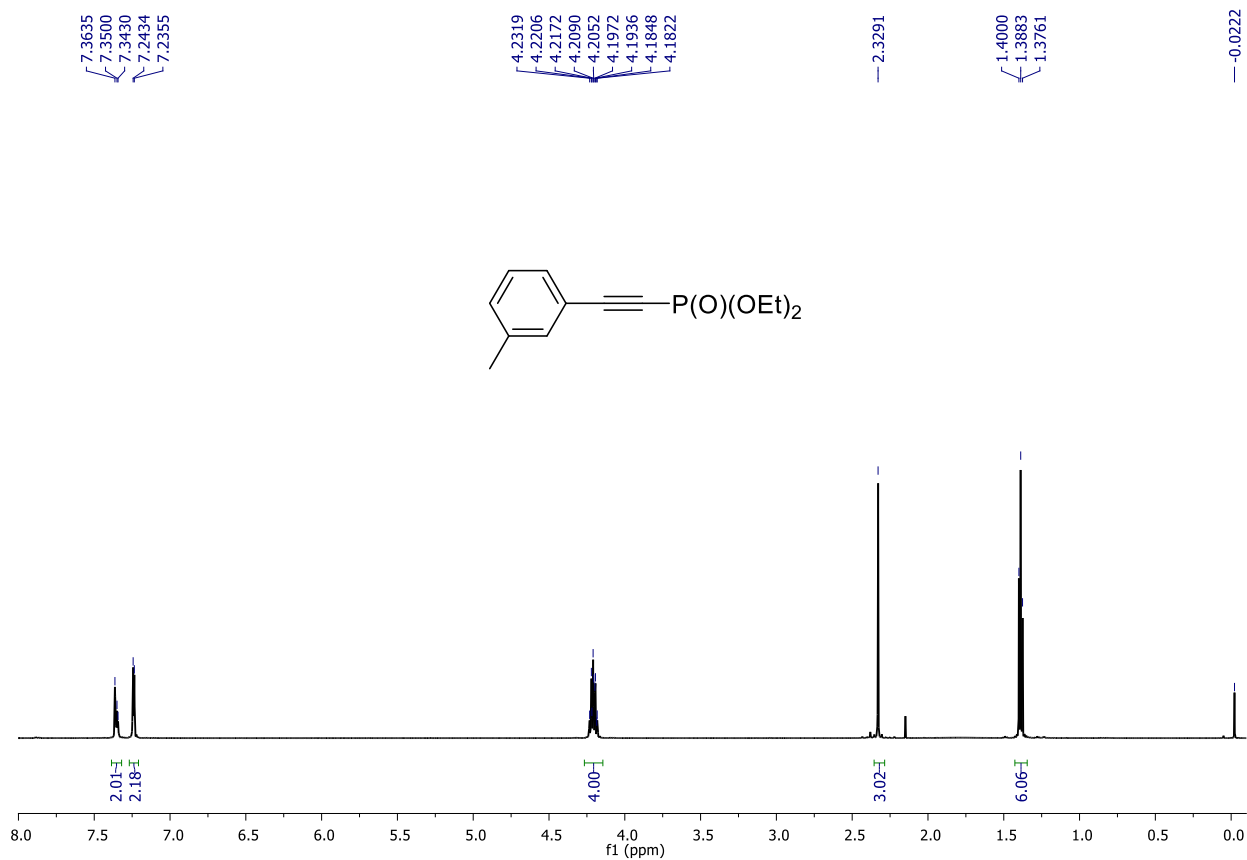

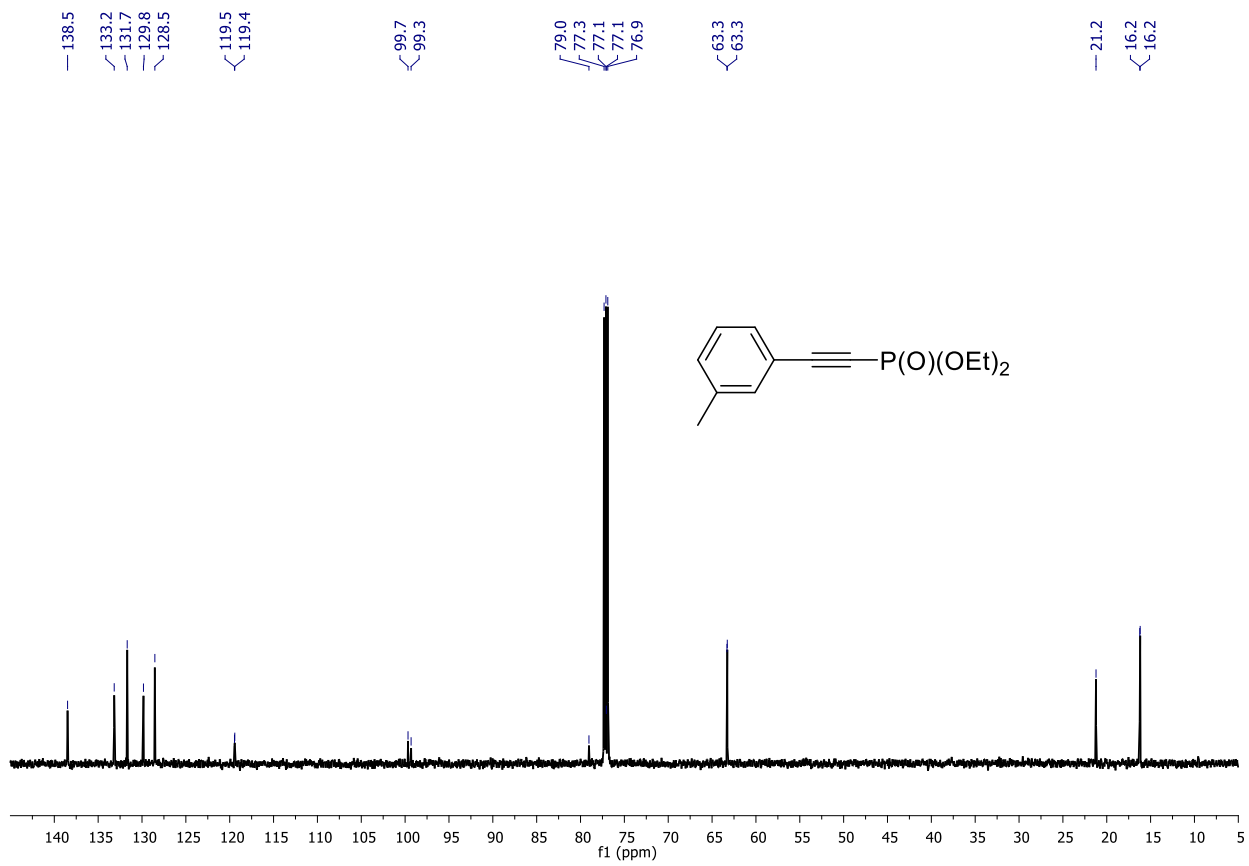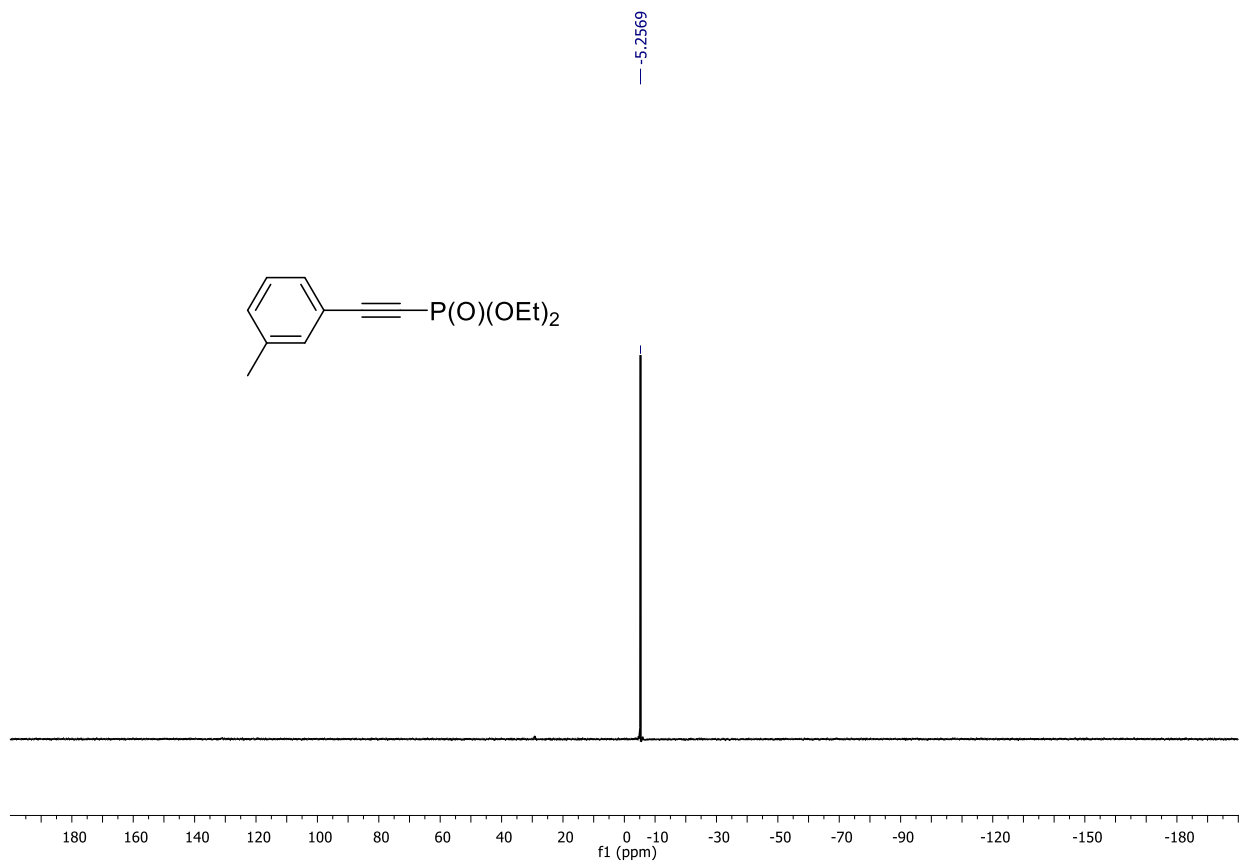

# Diethyl [(6-methoxynaphthalen-2-yl)ethynyl]phosphonate (3m):

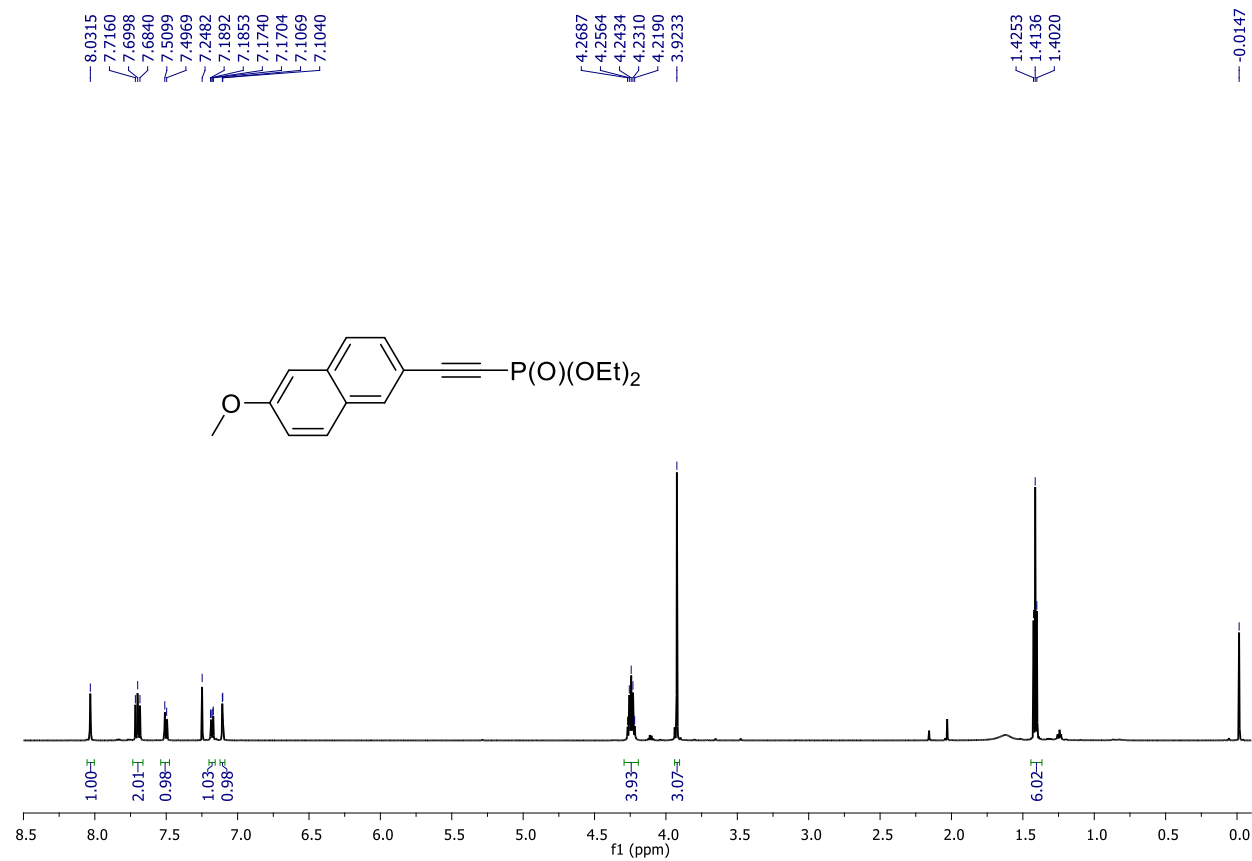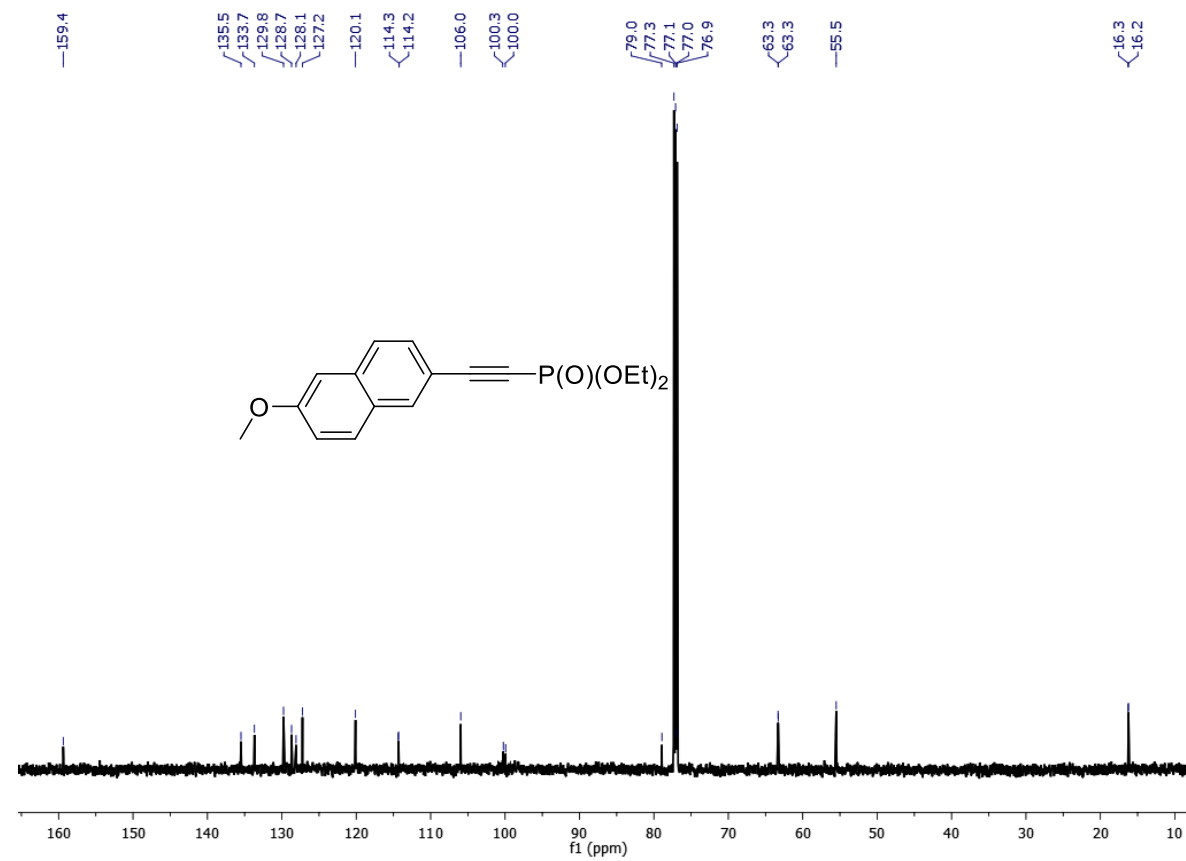

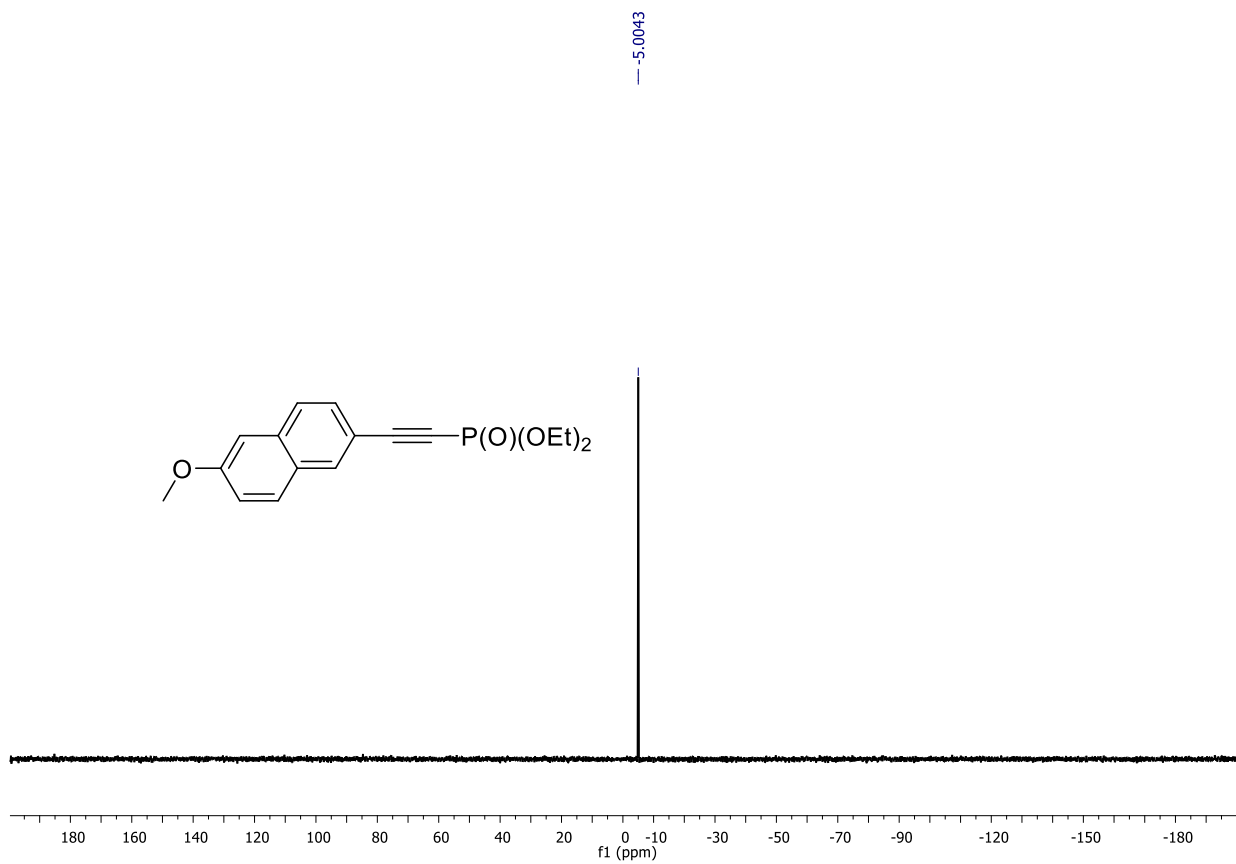

**Diethyl (pyridine-2-ylethynyl)phosphonate (3n):**

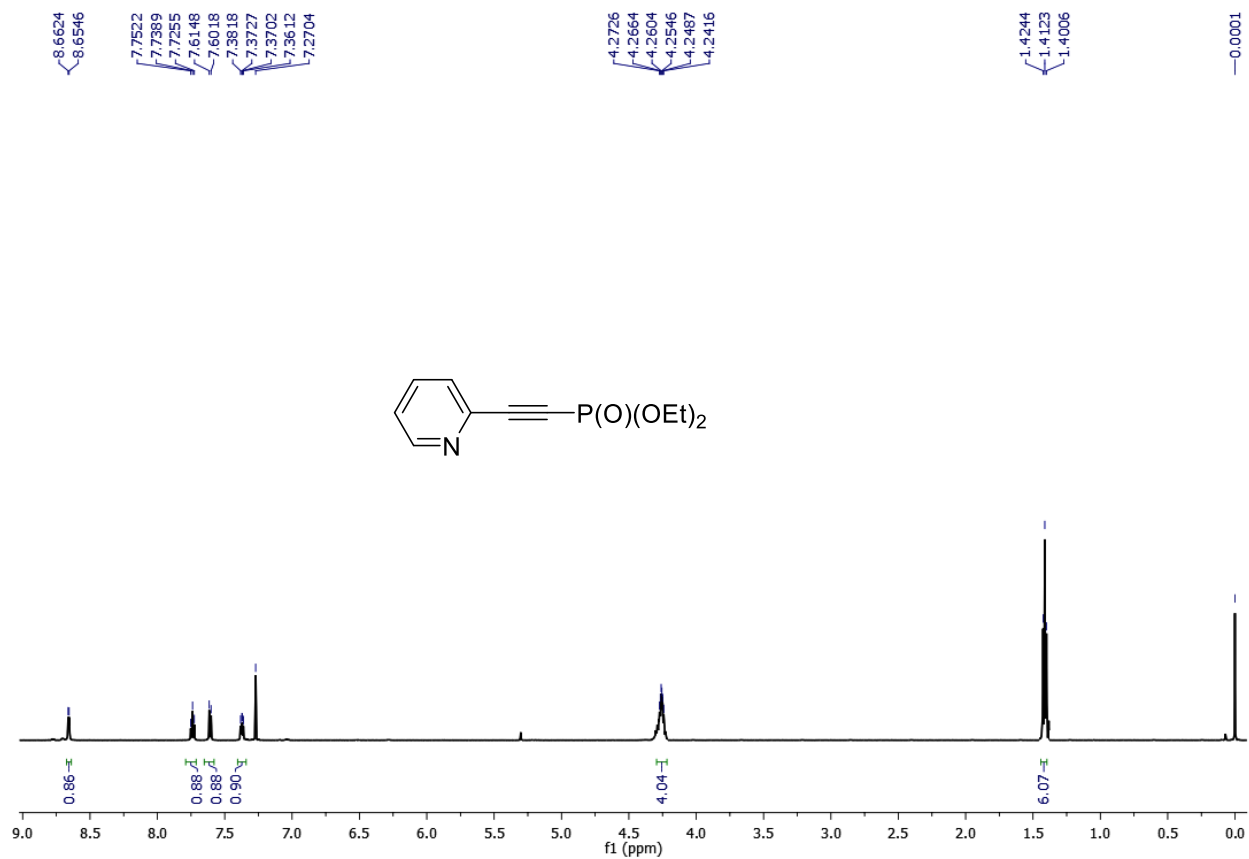

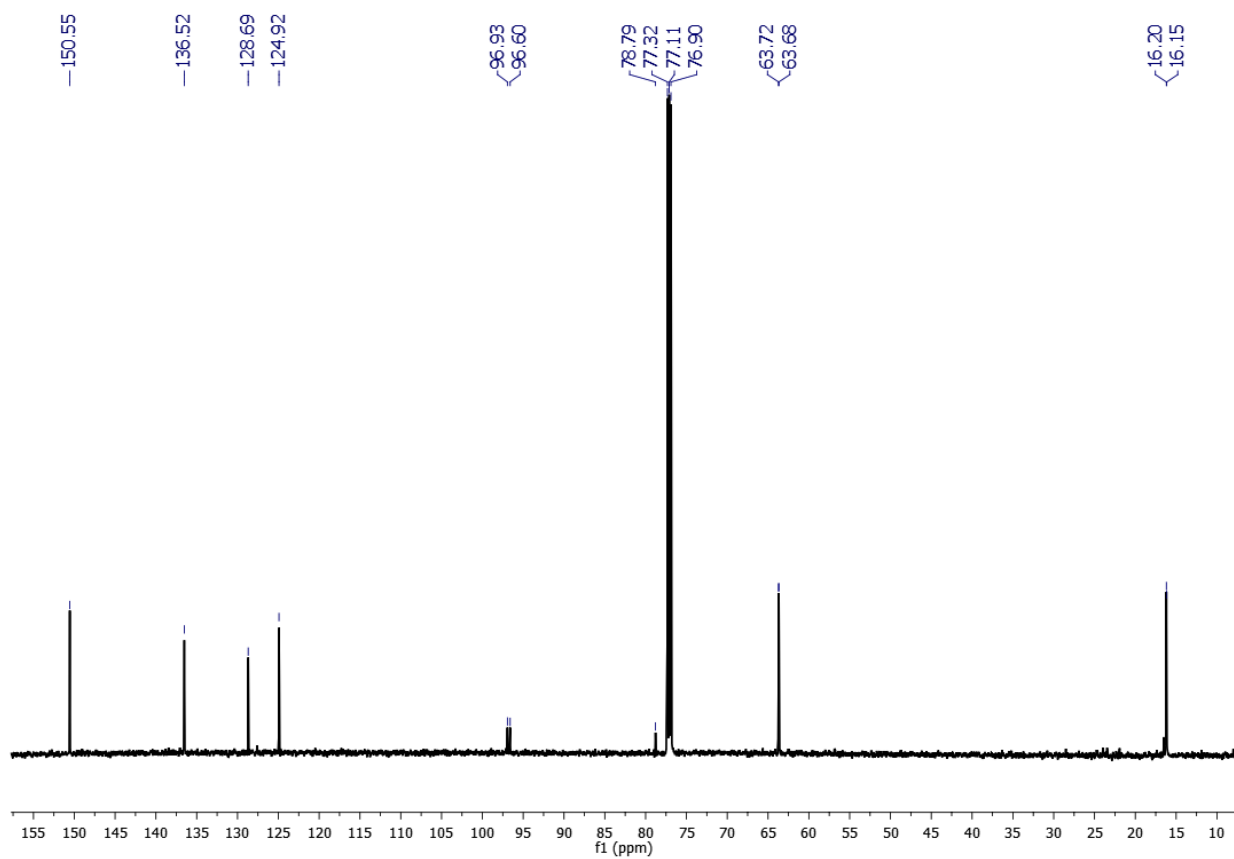

-6.5796

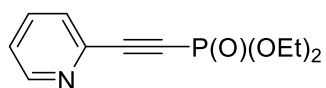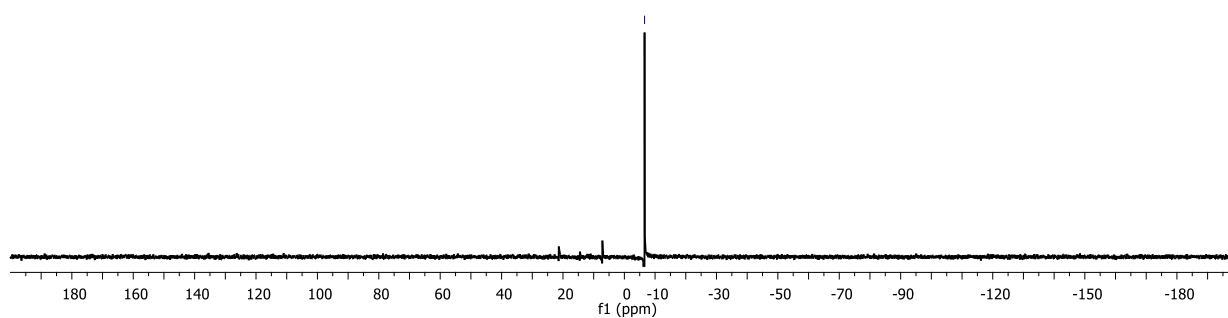

**Diethyl (cyclohexen-1-ylethynyl)phosphonate (30):**

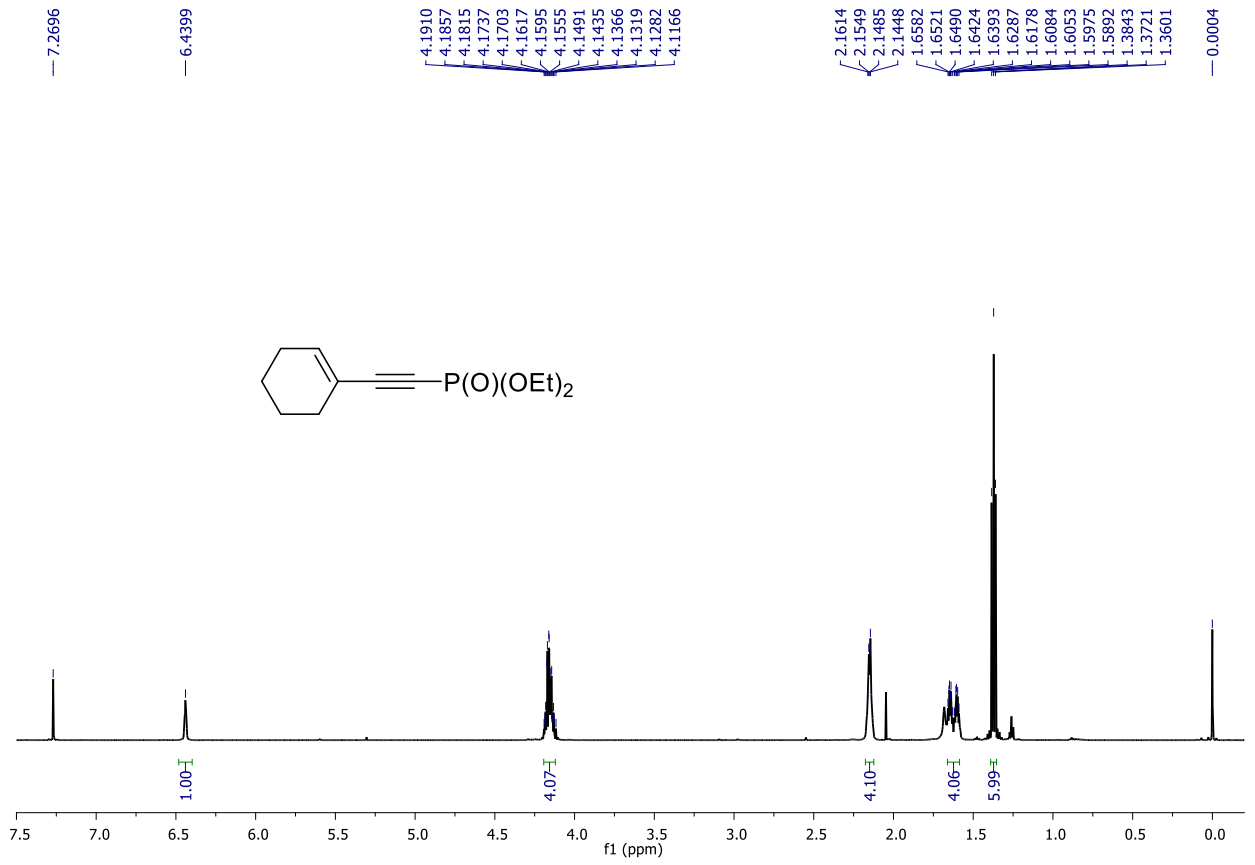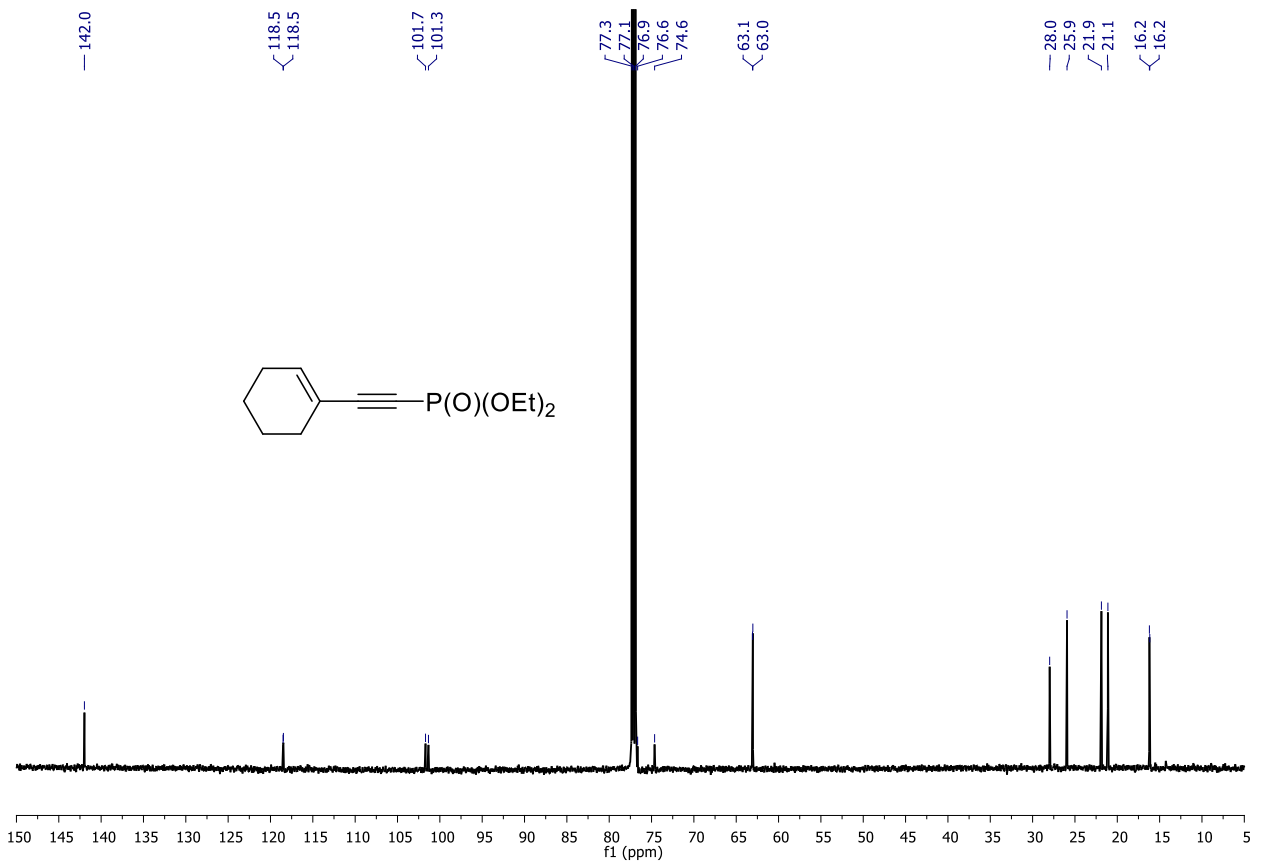



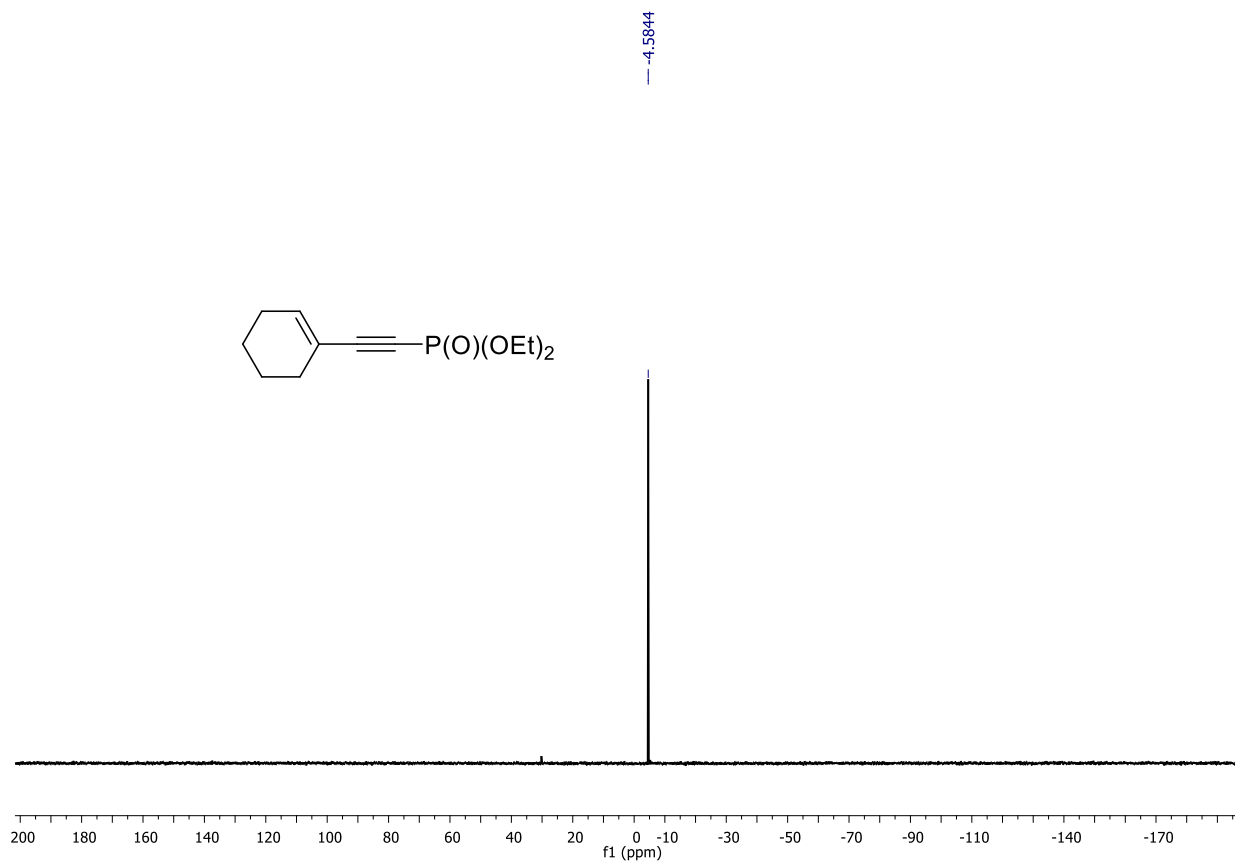

**3-(diethoxyphosphoryl)prop-2-yn-1-yl benzoate (3p):**

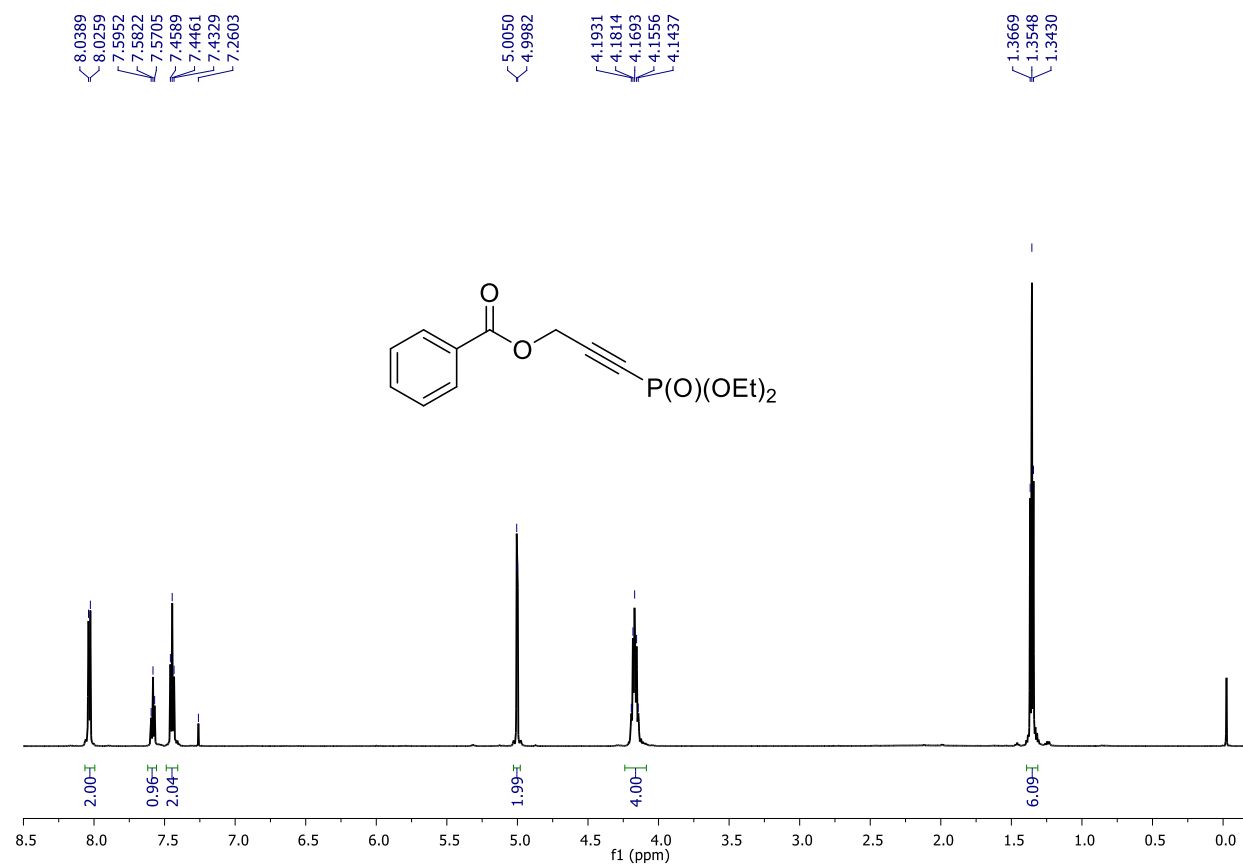

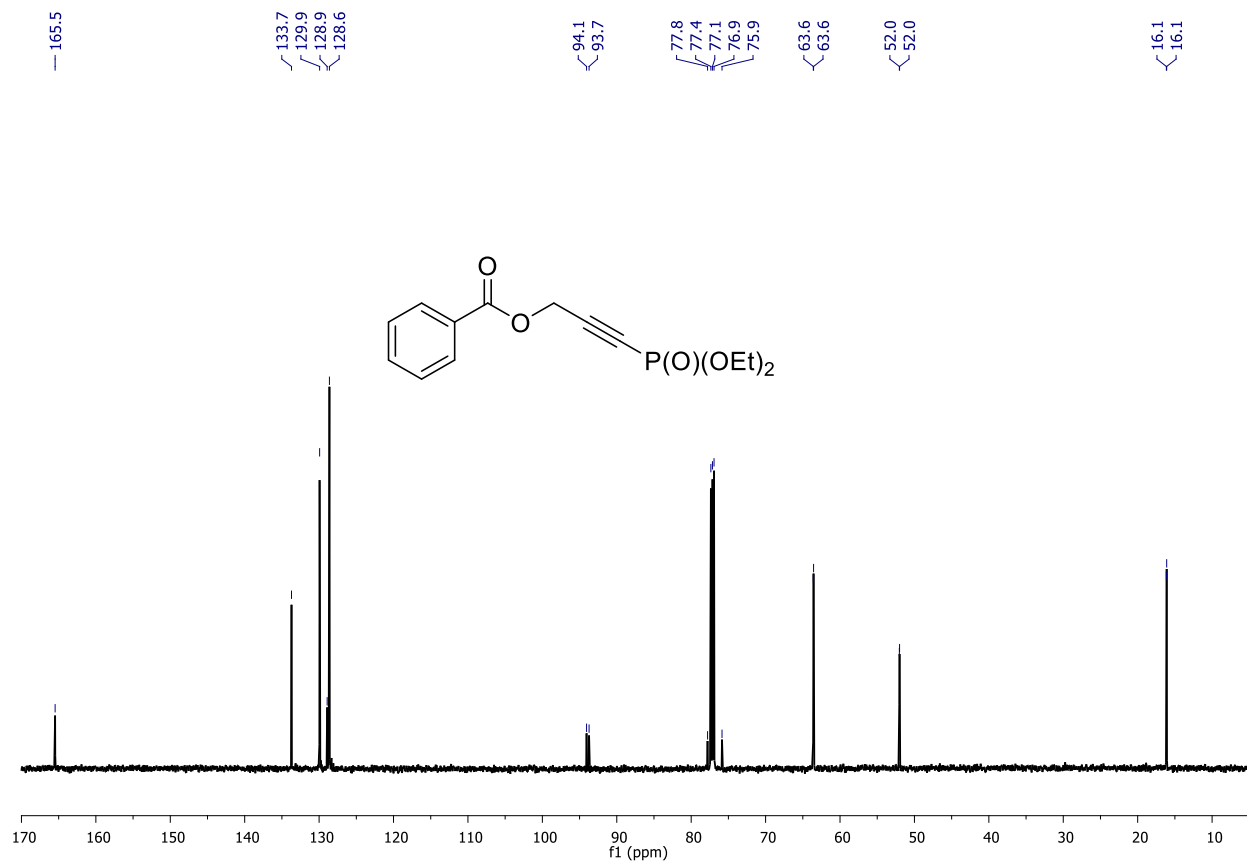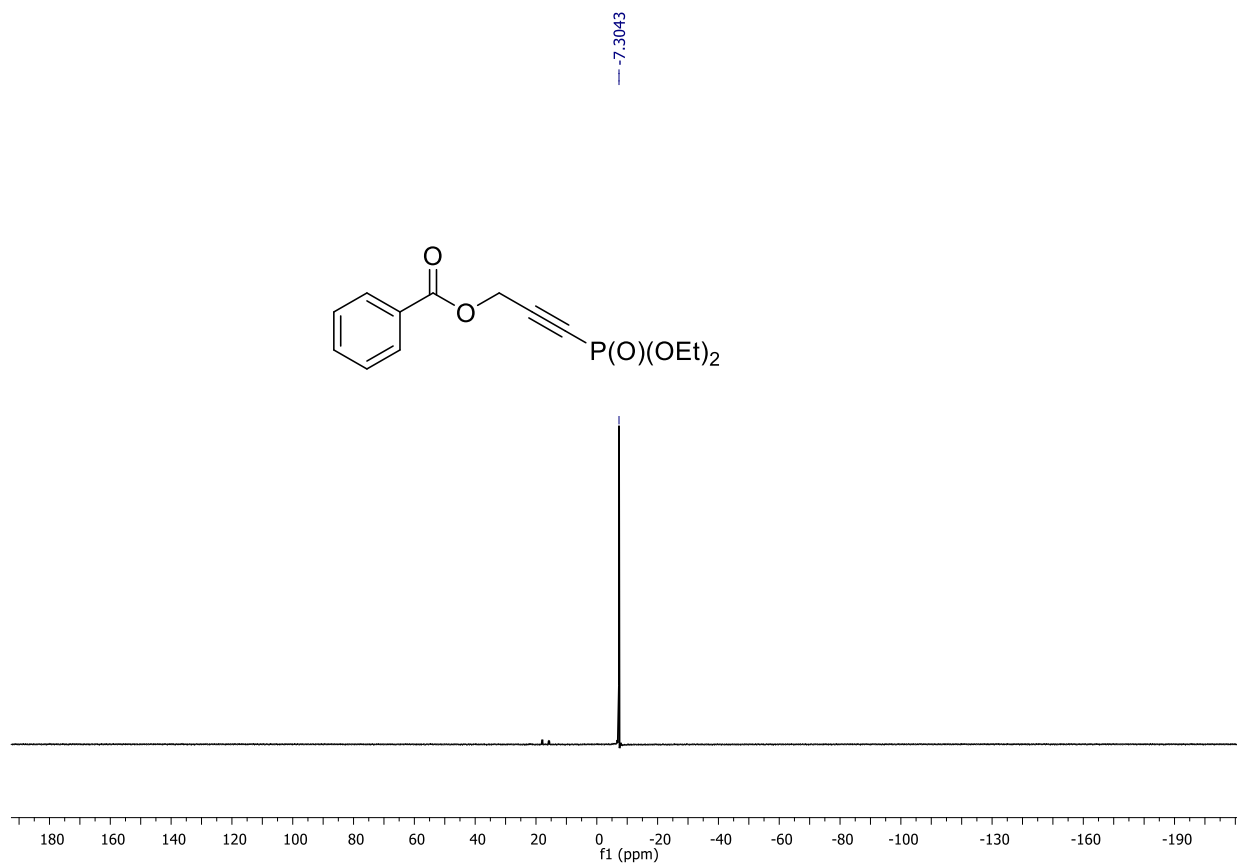

**Diethyl hex-1-yn-1-ylphosphonate (3r):**

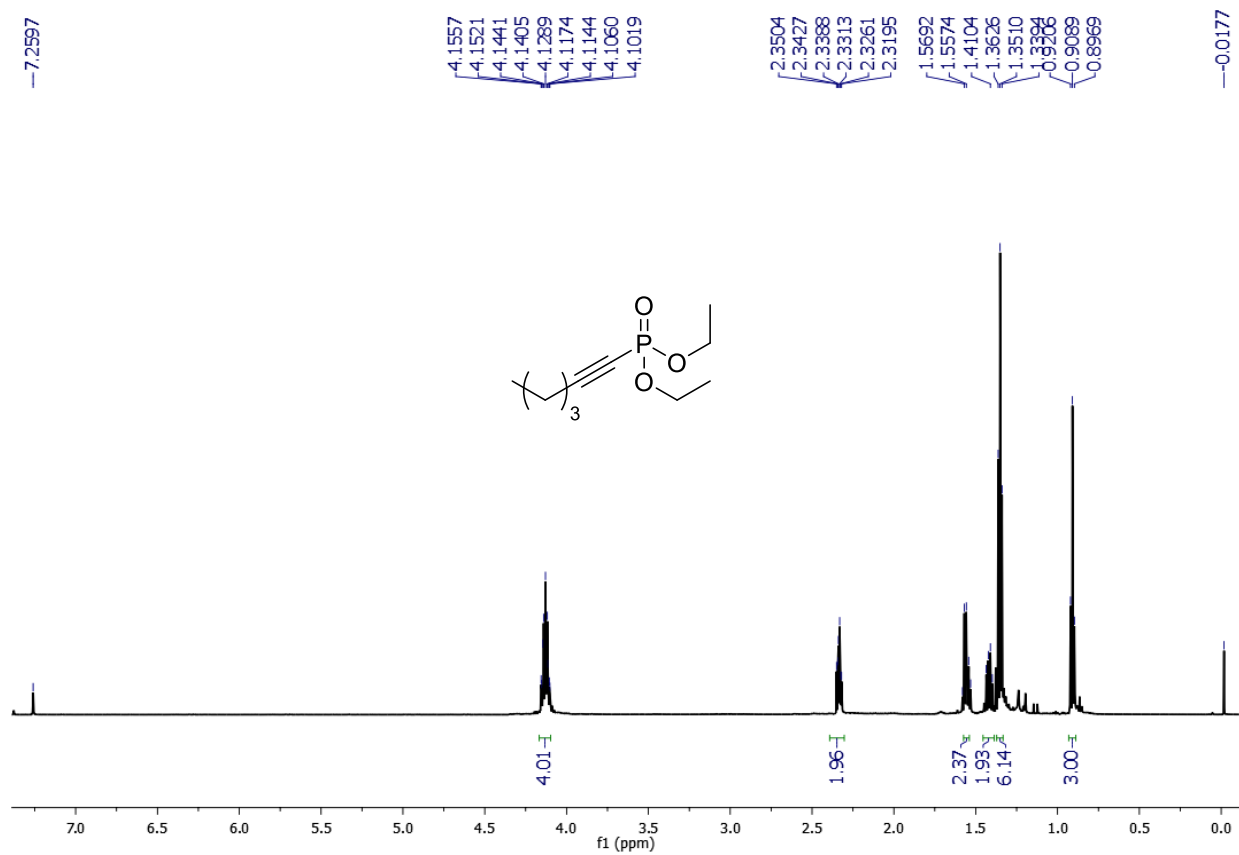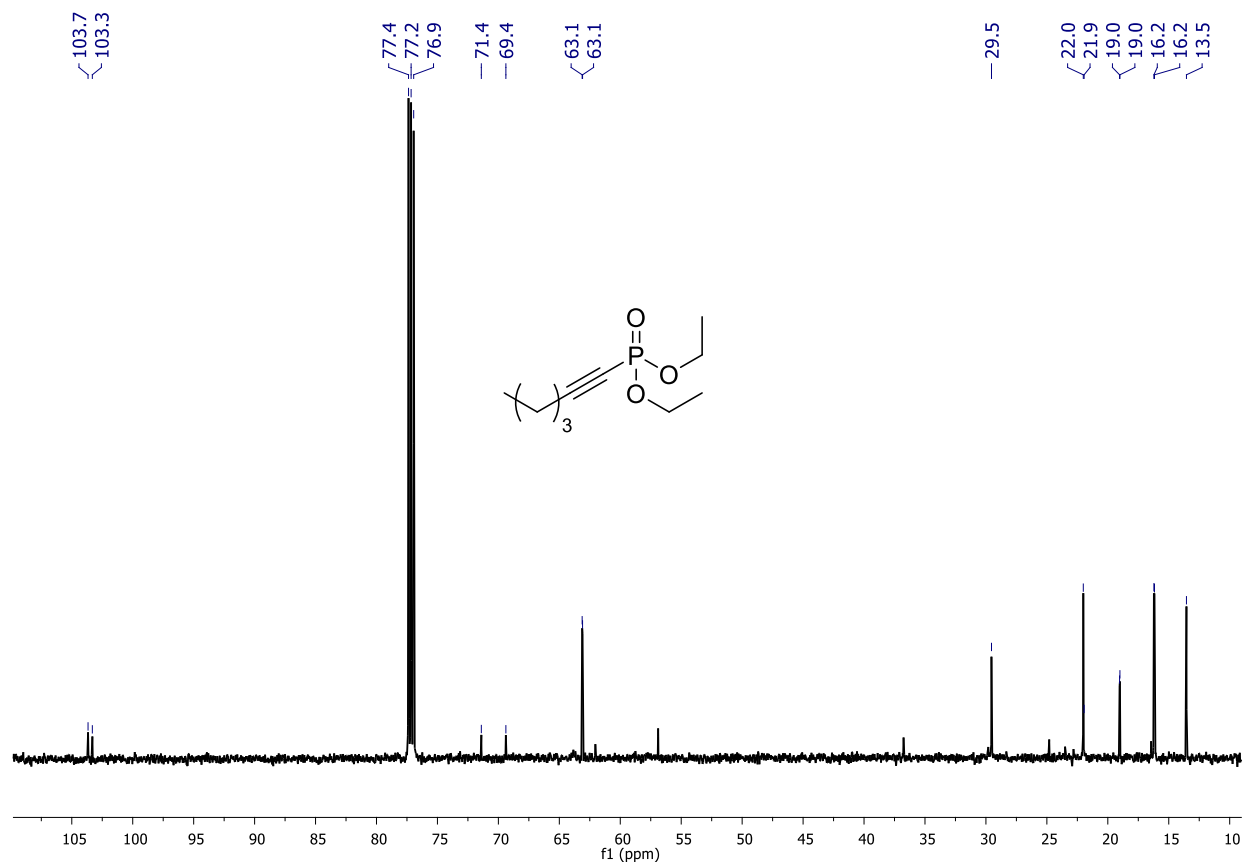

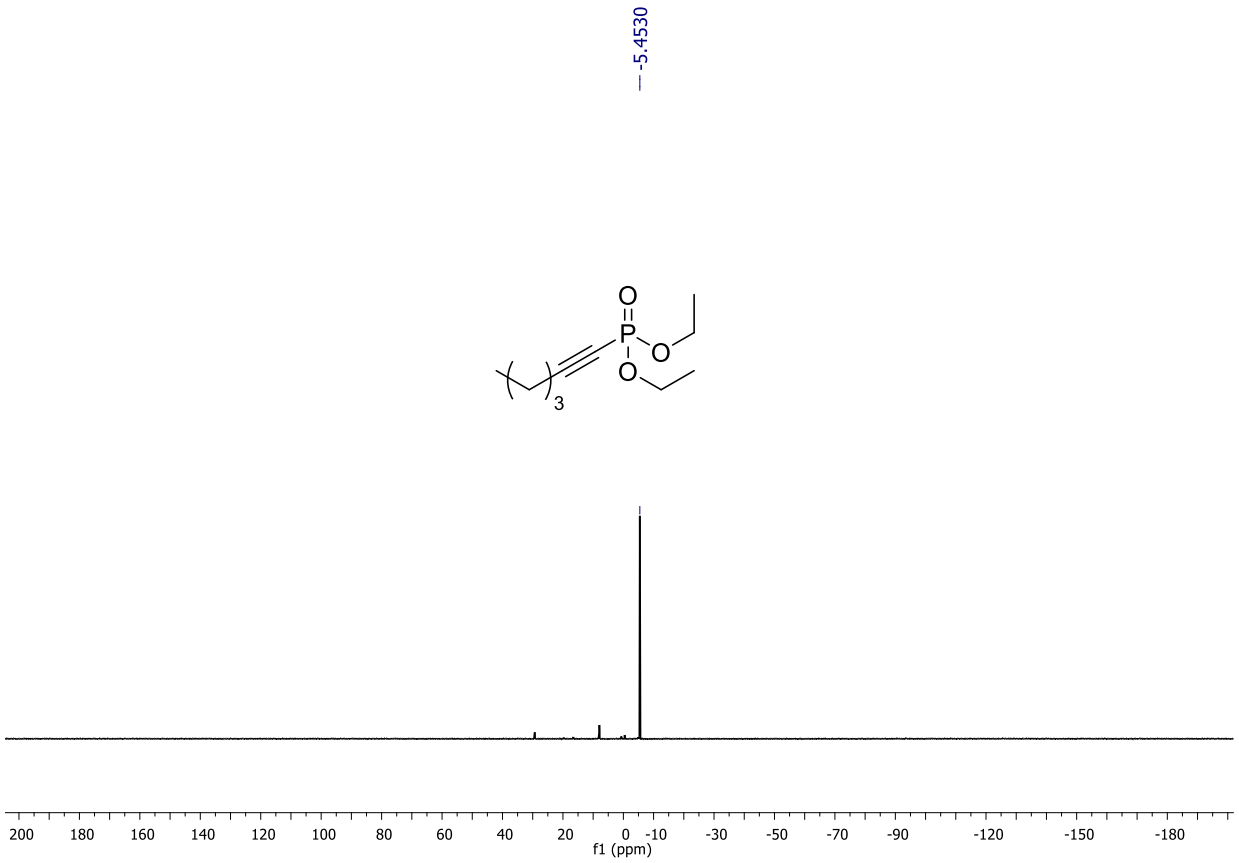

**Diethyl dec-1-yn-1-ylphosphonate (3s):**

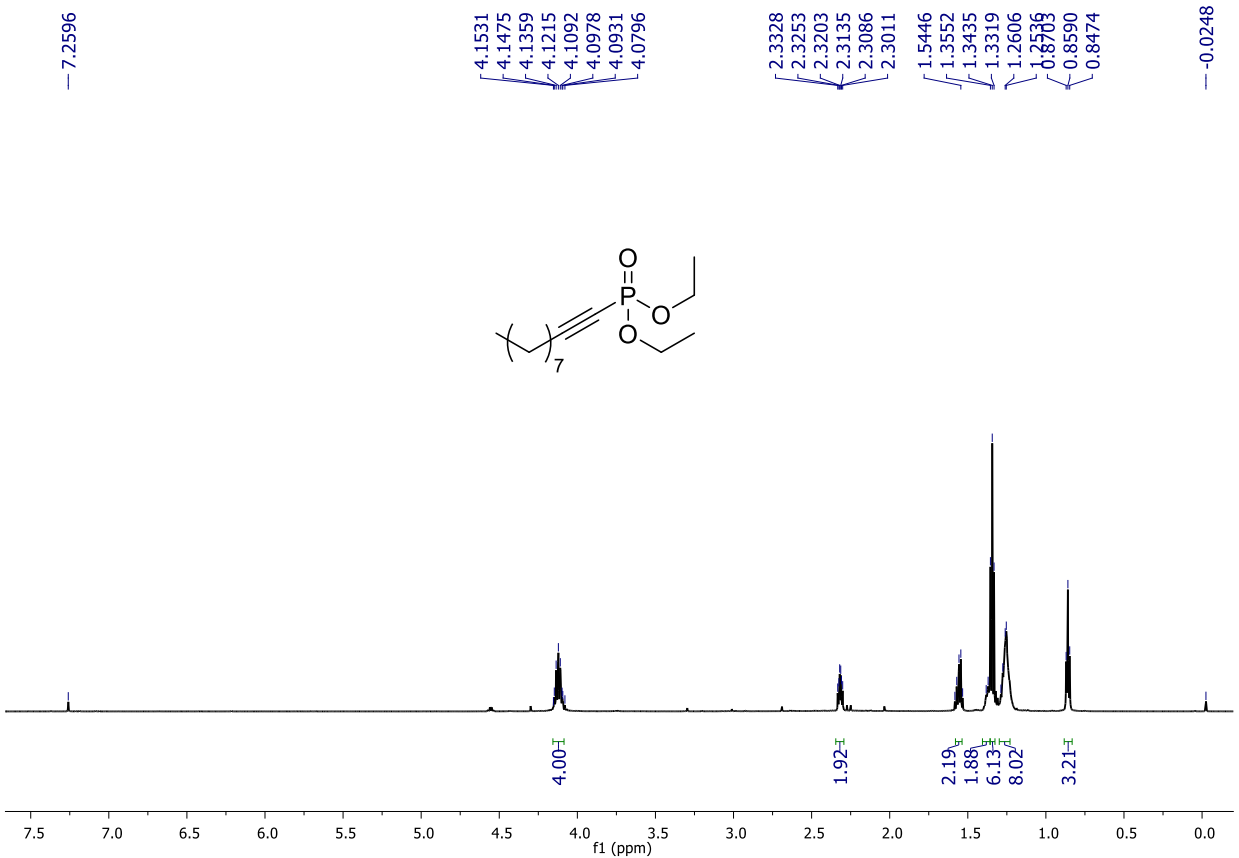



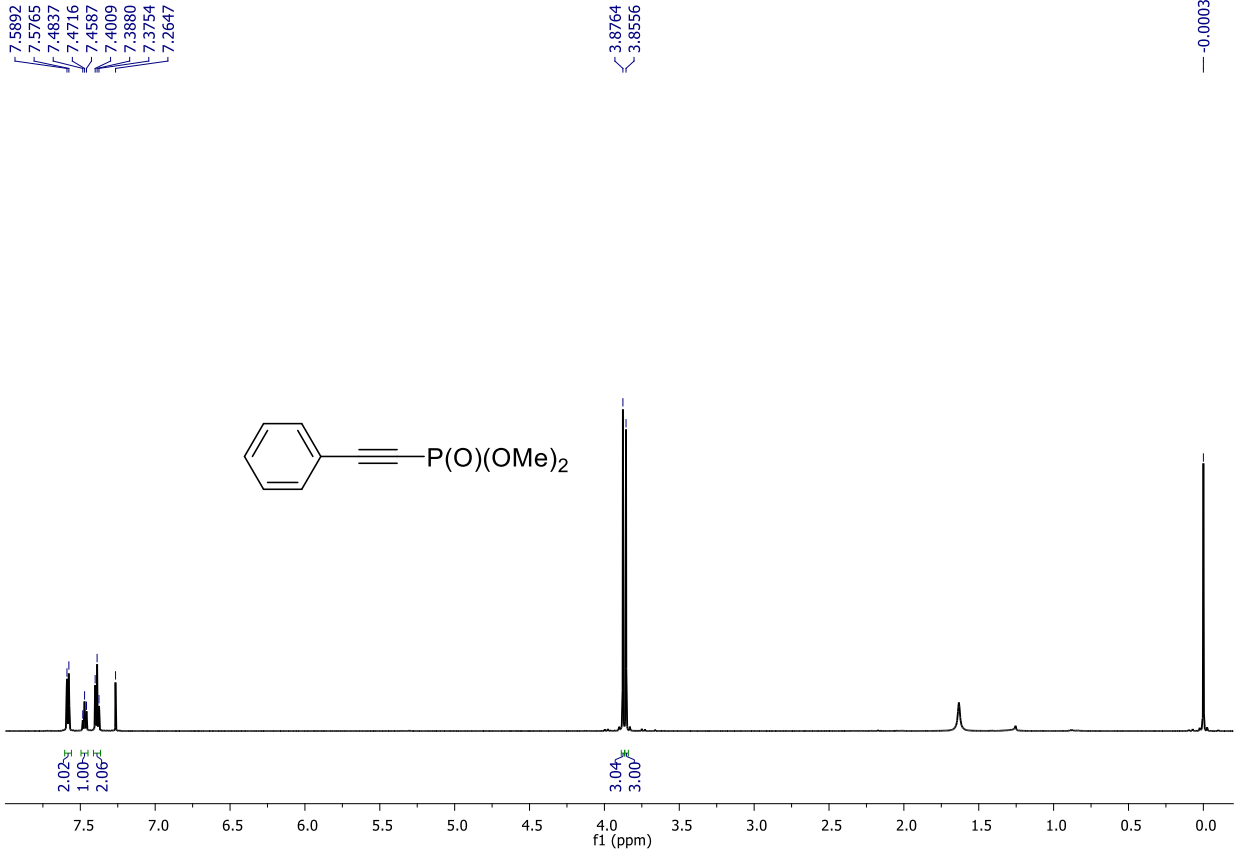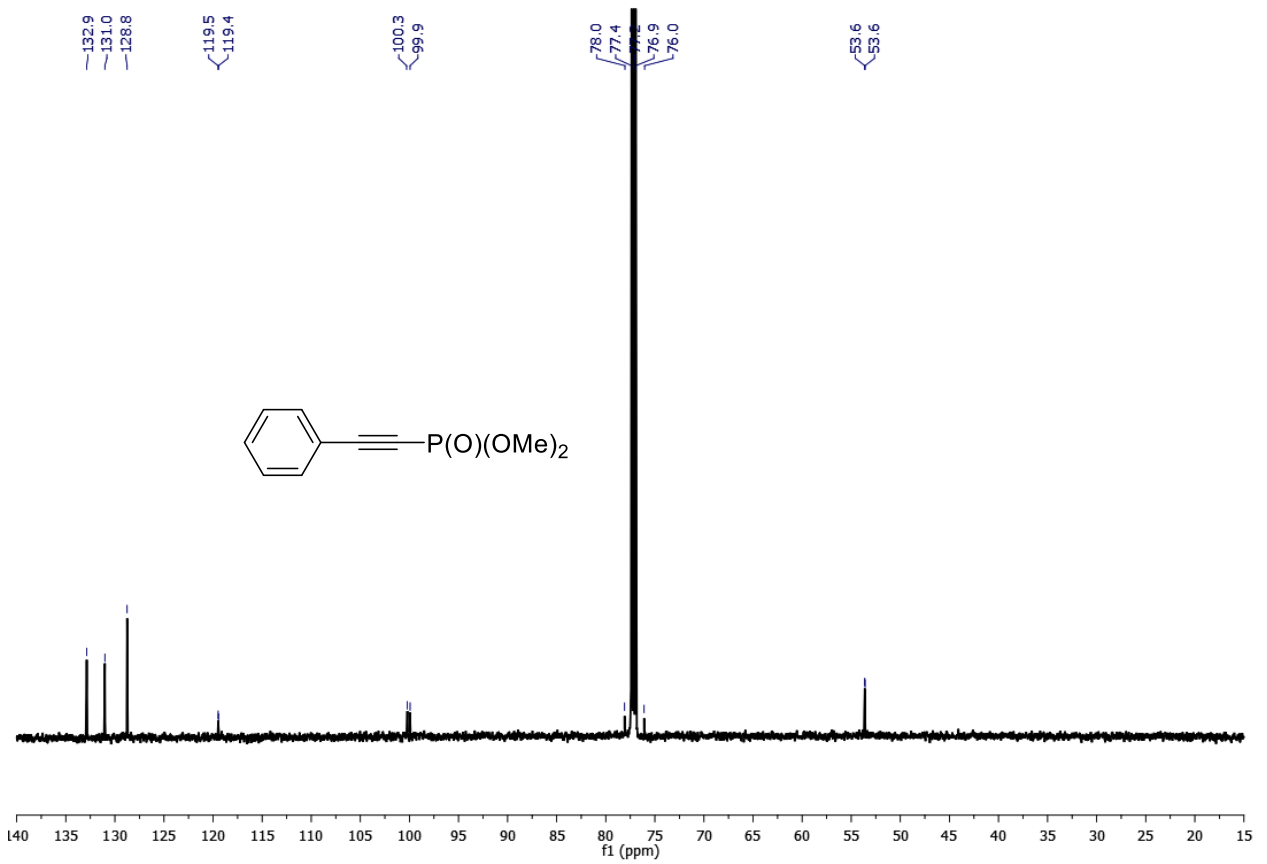

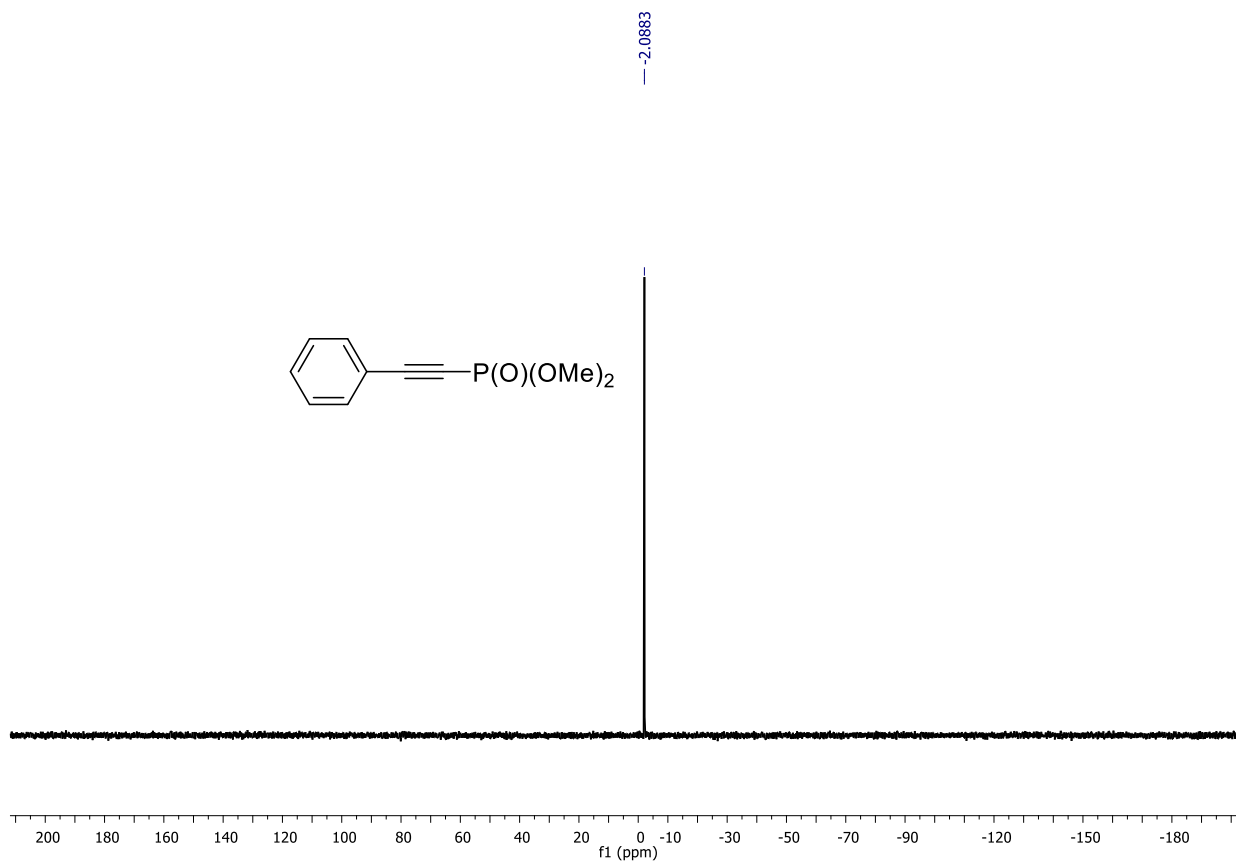

**Diisopropyl [(4-bromophenyl)ethynyl]phosphonate (4a):**

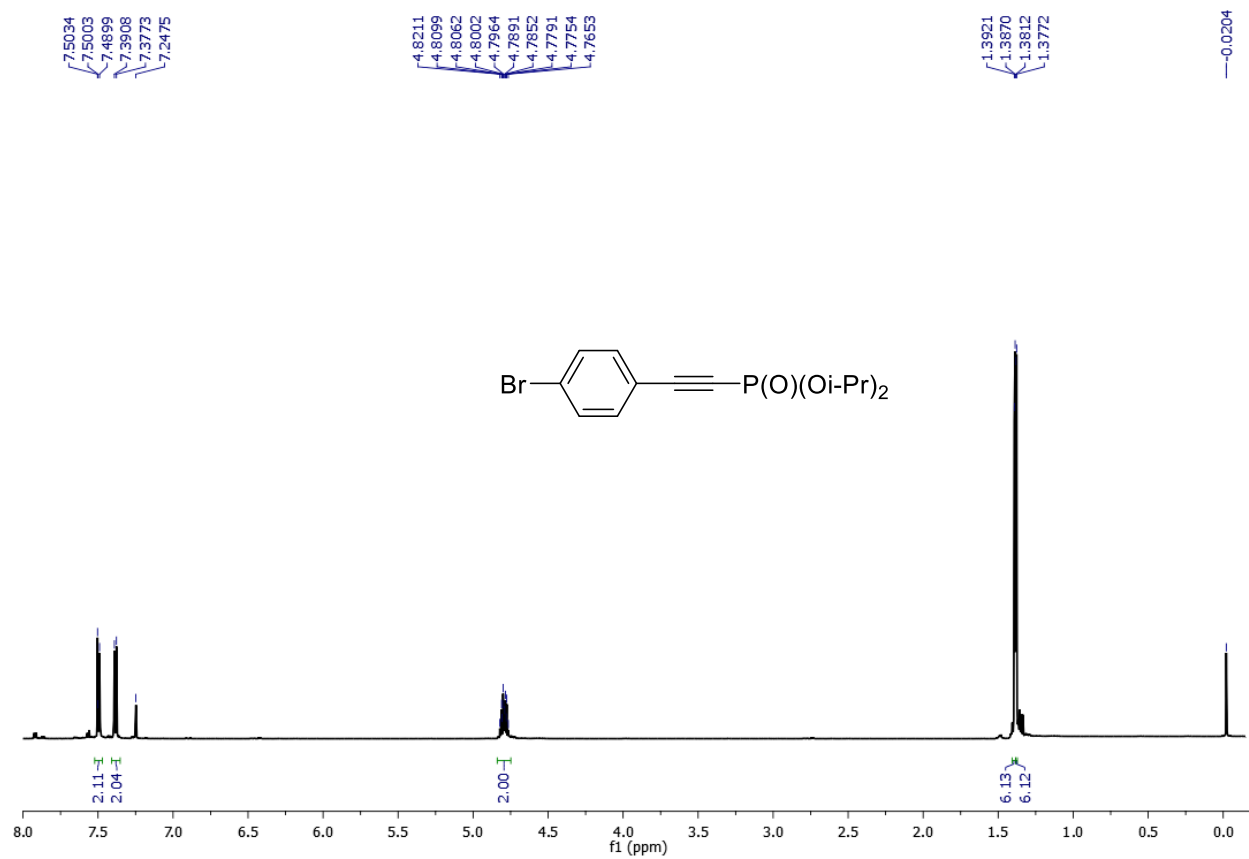

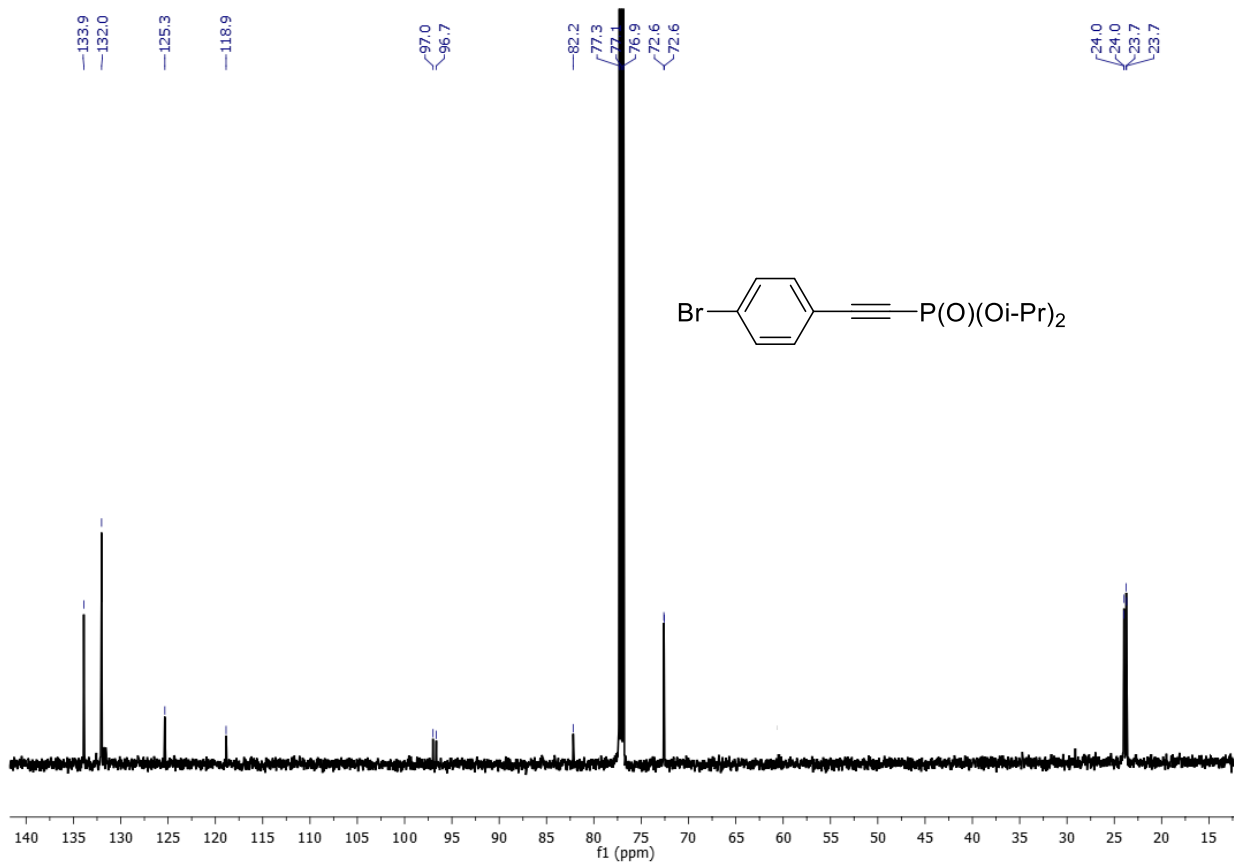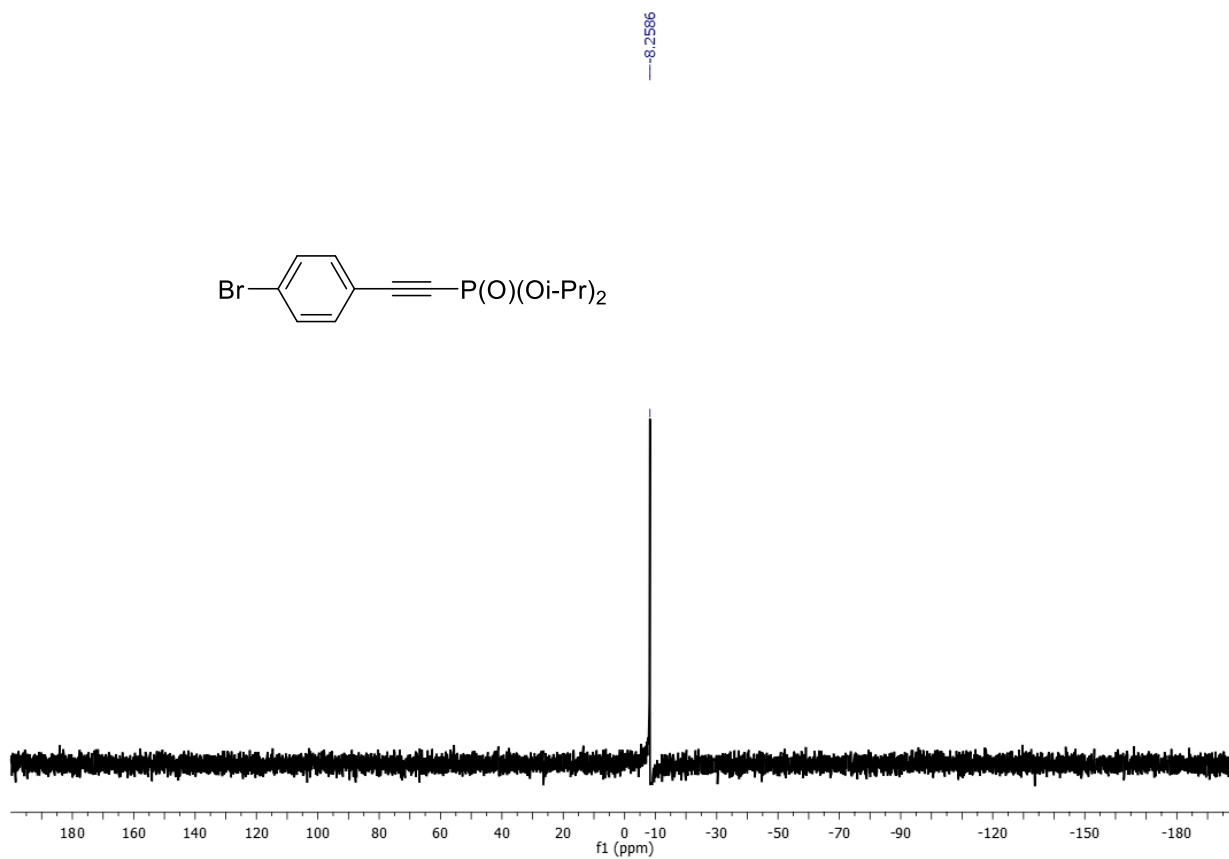



# Diisopropyl (phenylethynyl)phosphonate (4b):

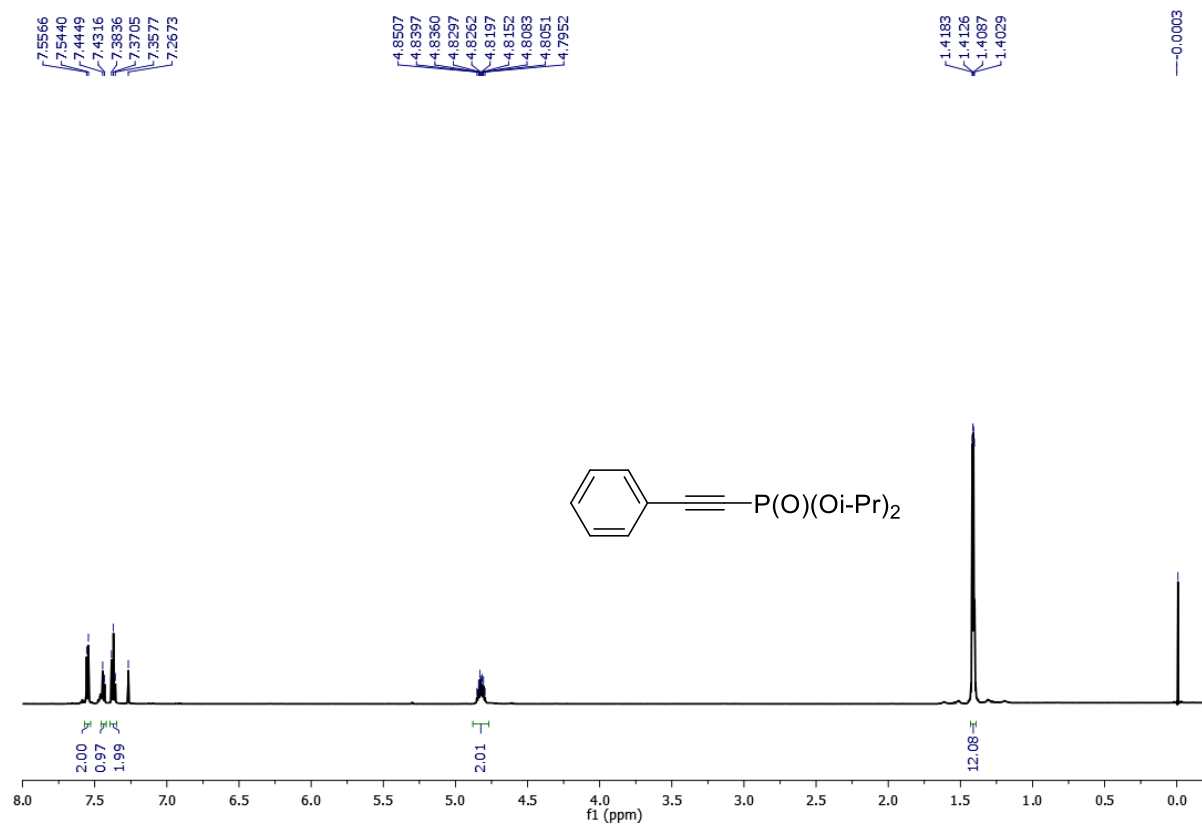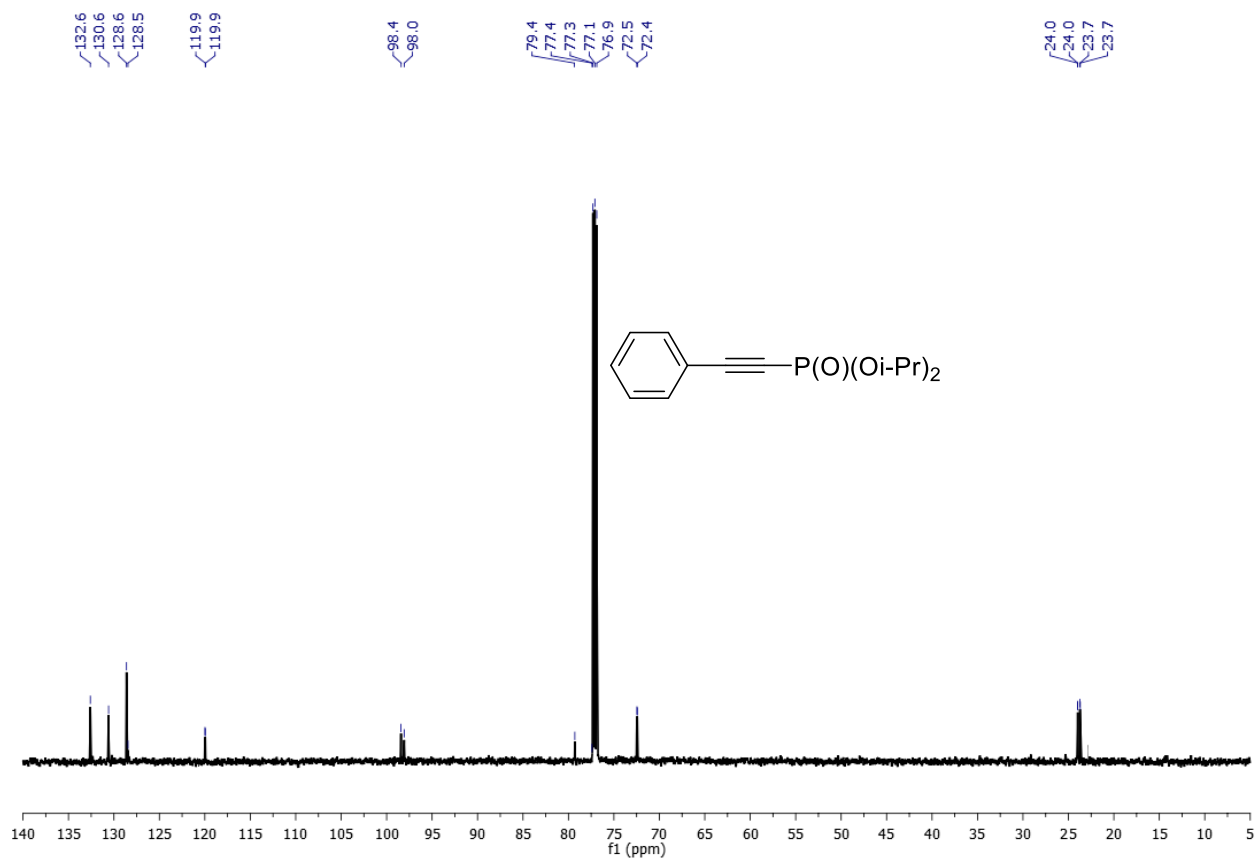

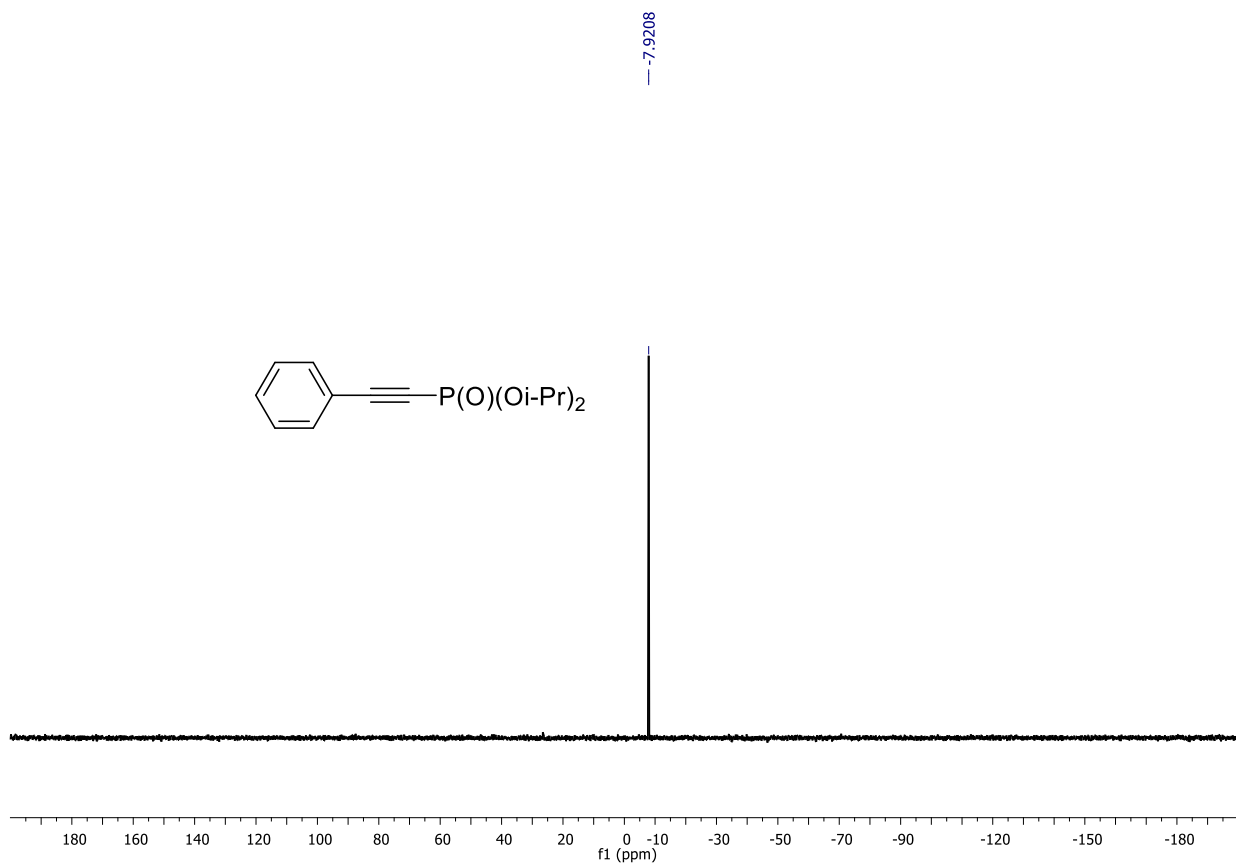

**Diisopropyl [(4-fluorophenyl)ethynyl]phosphonate (4c):**

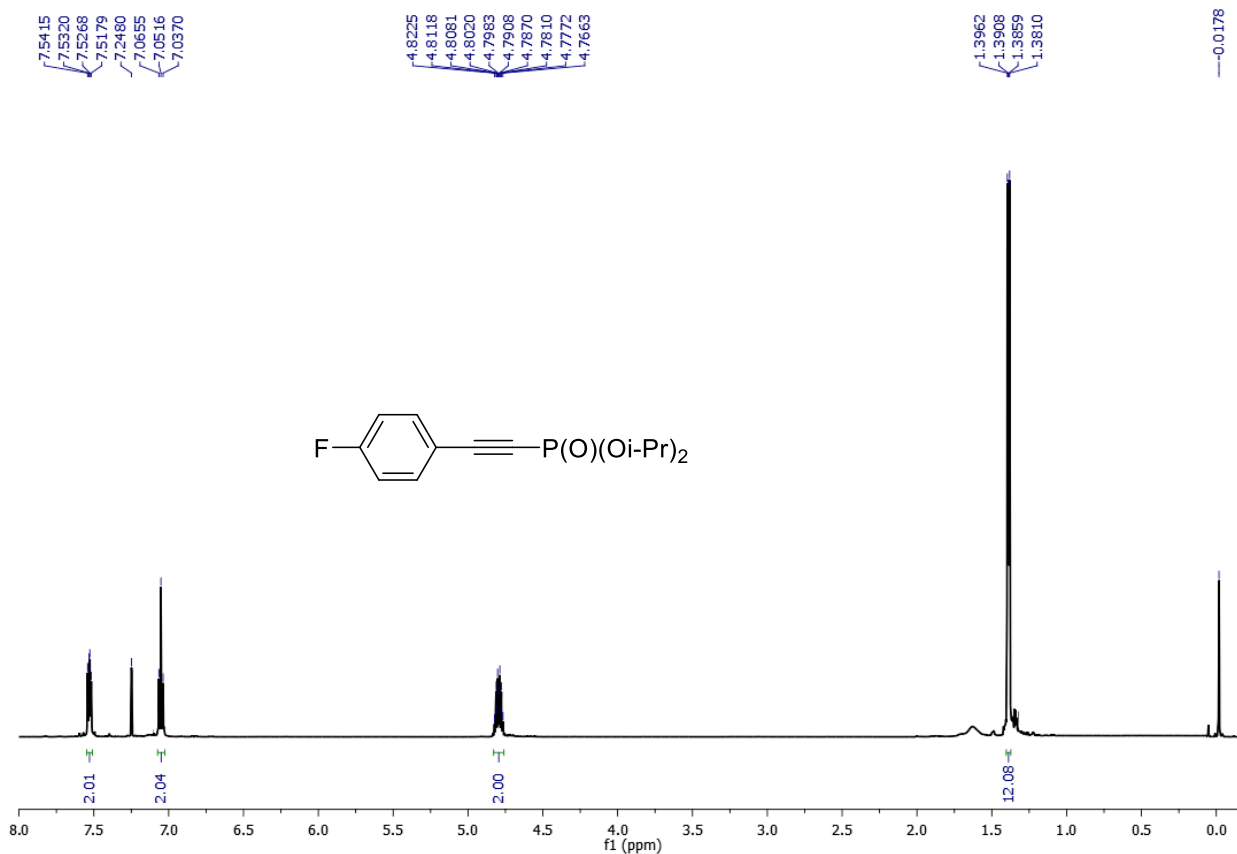

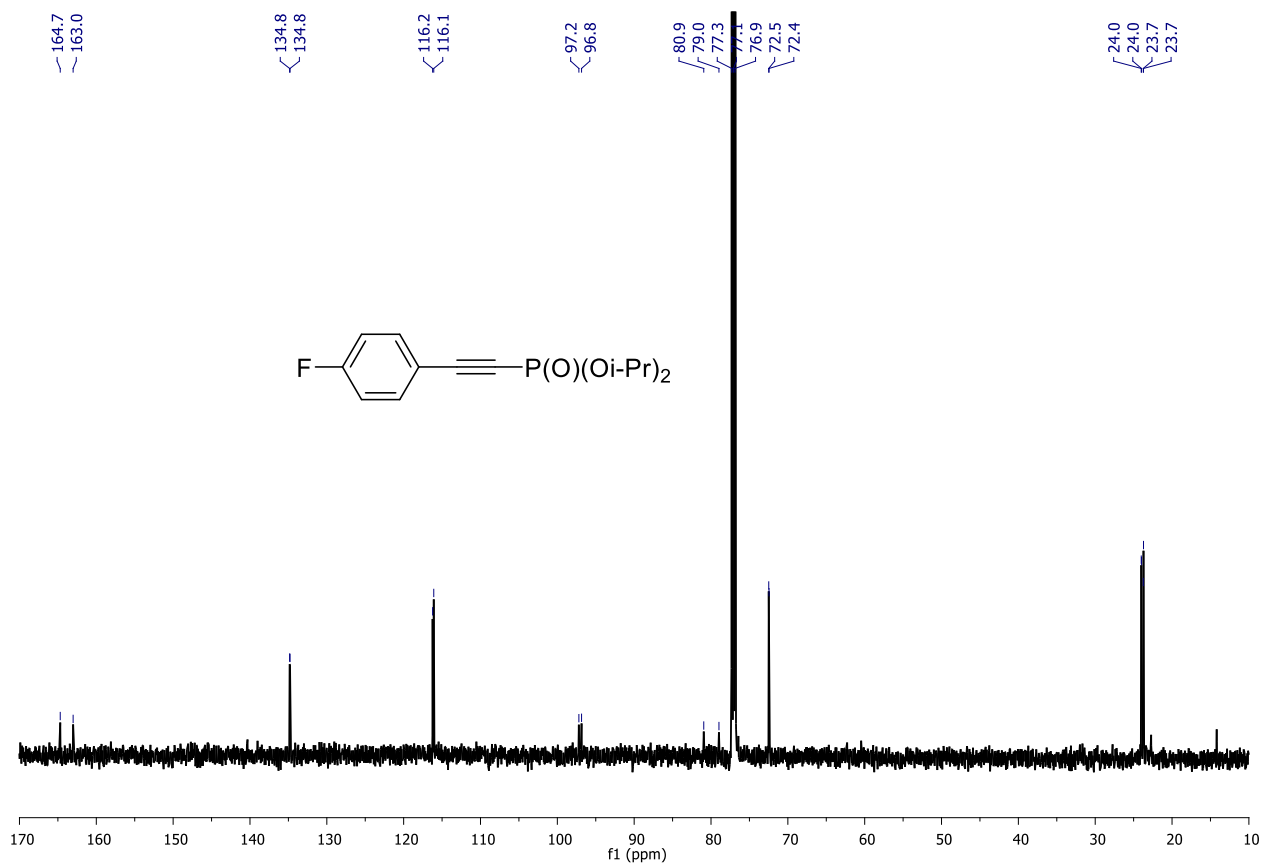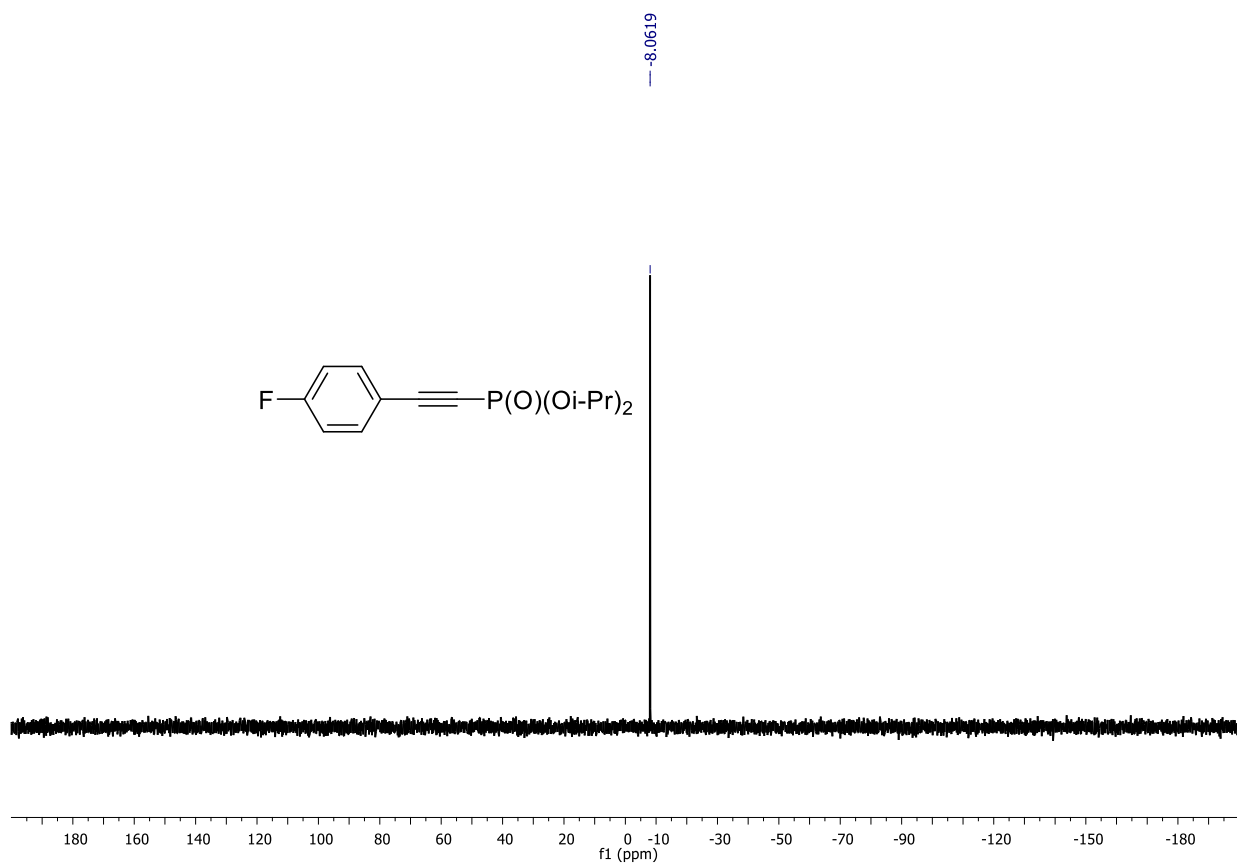

**Diisopropyl (4-tolyethynyl)phosphonate (4d):**

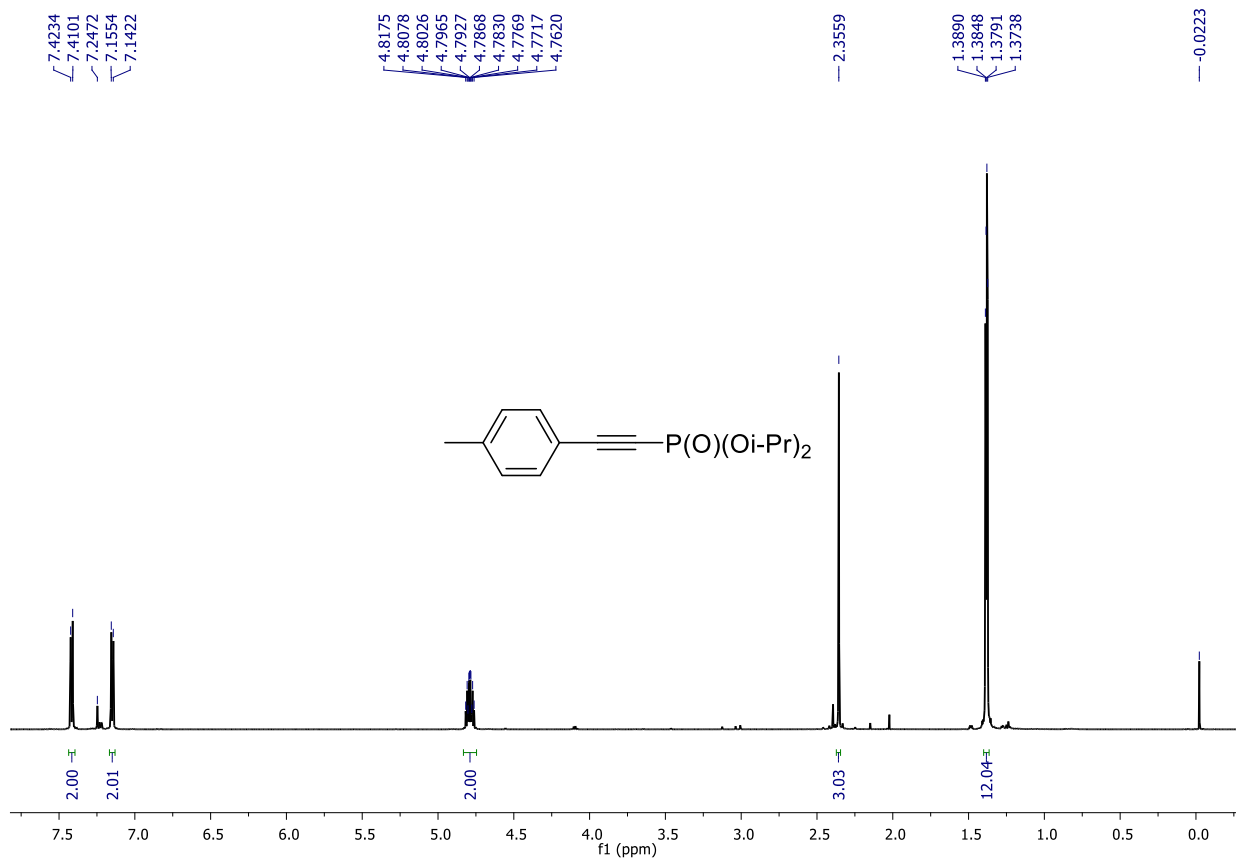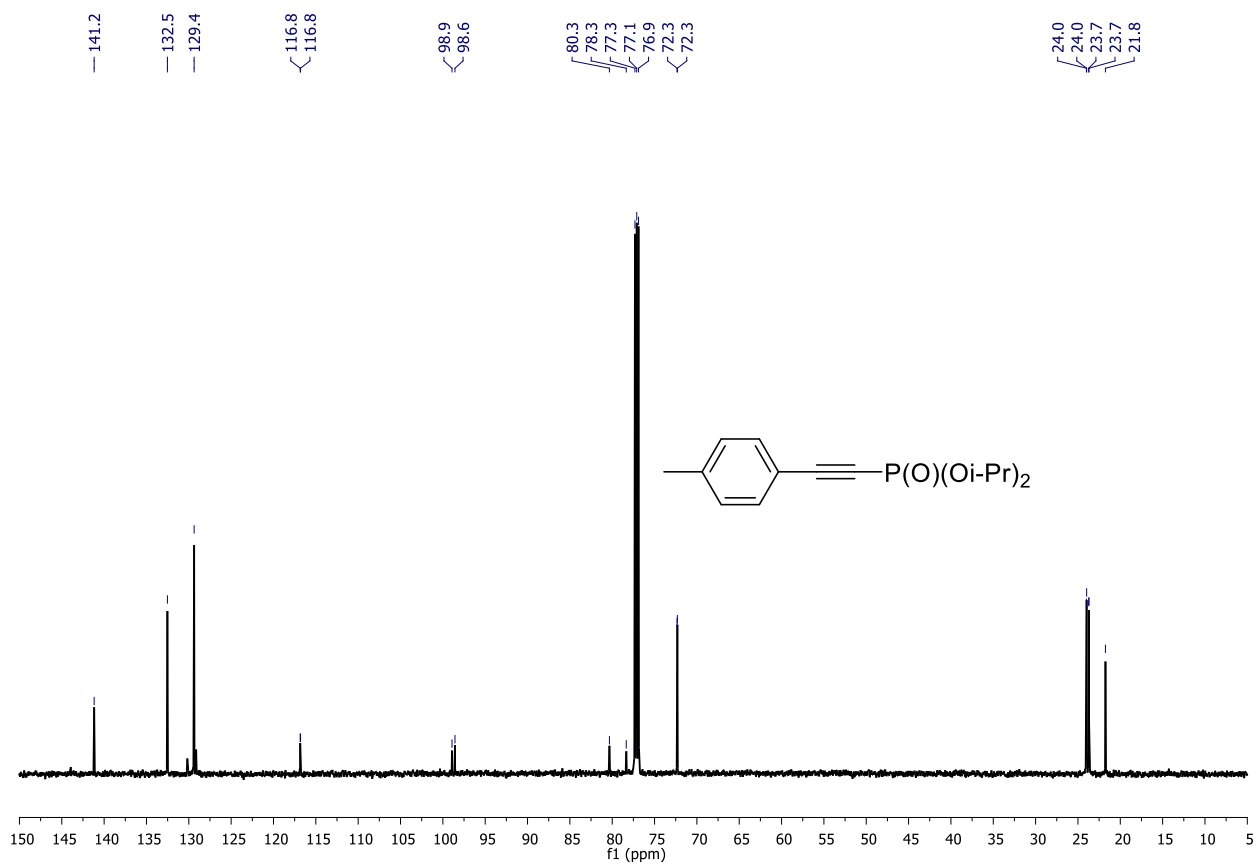

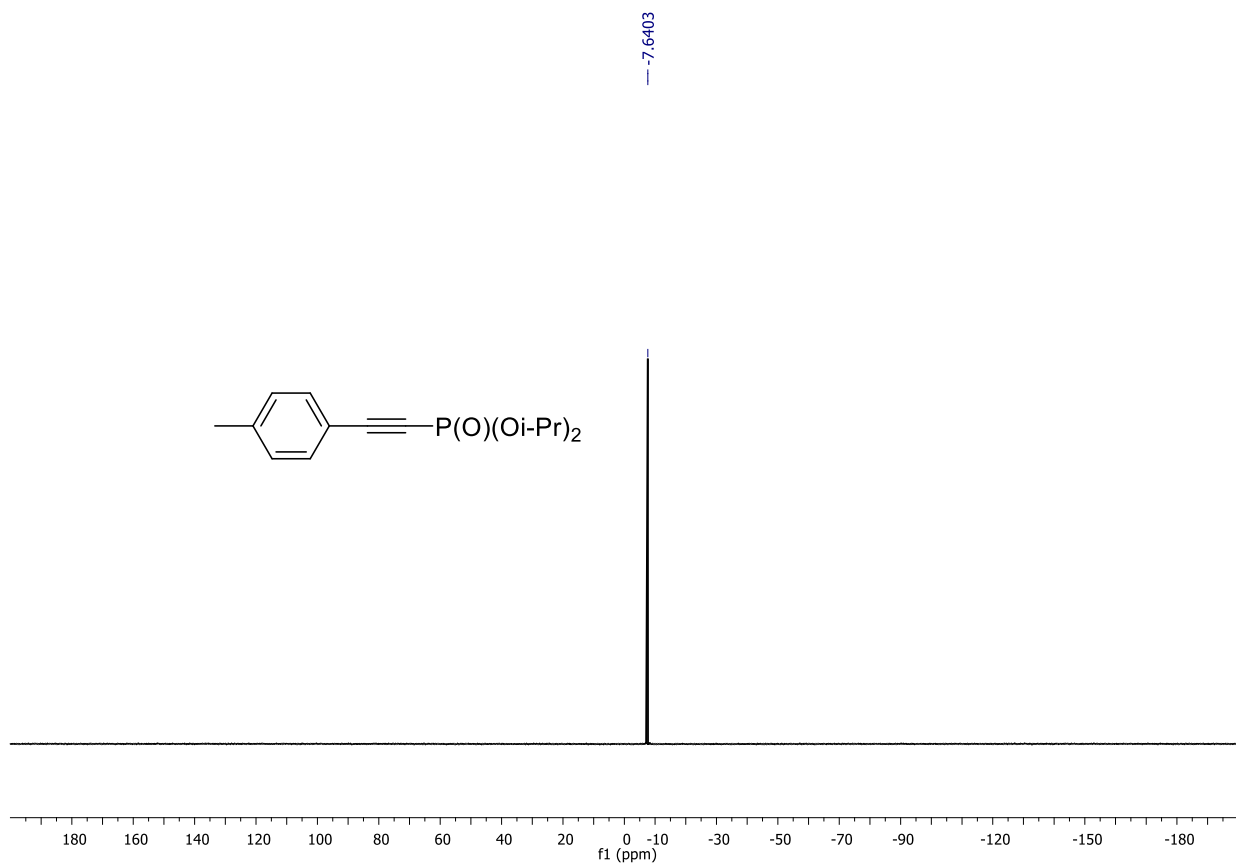

**Diisopropyl [(4-*tert*-butylphenyl)ethynyl]phosphonate (4e):**

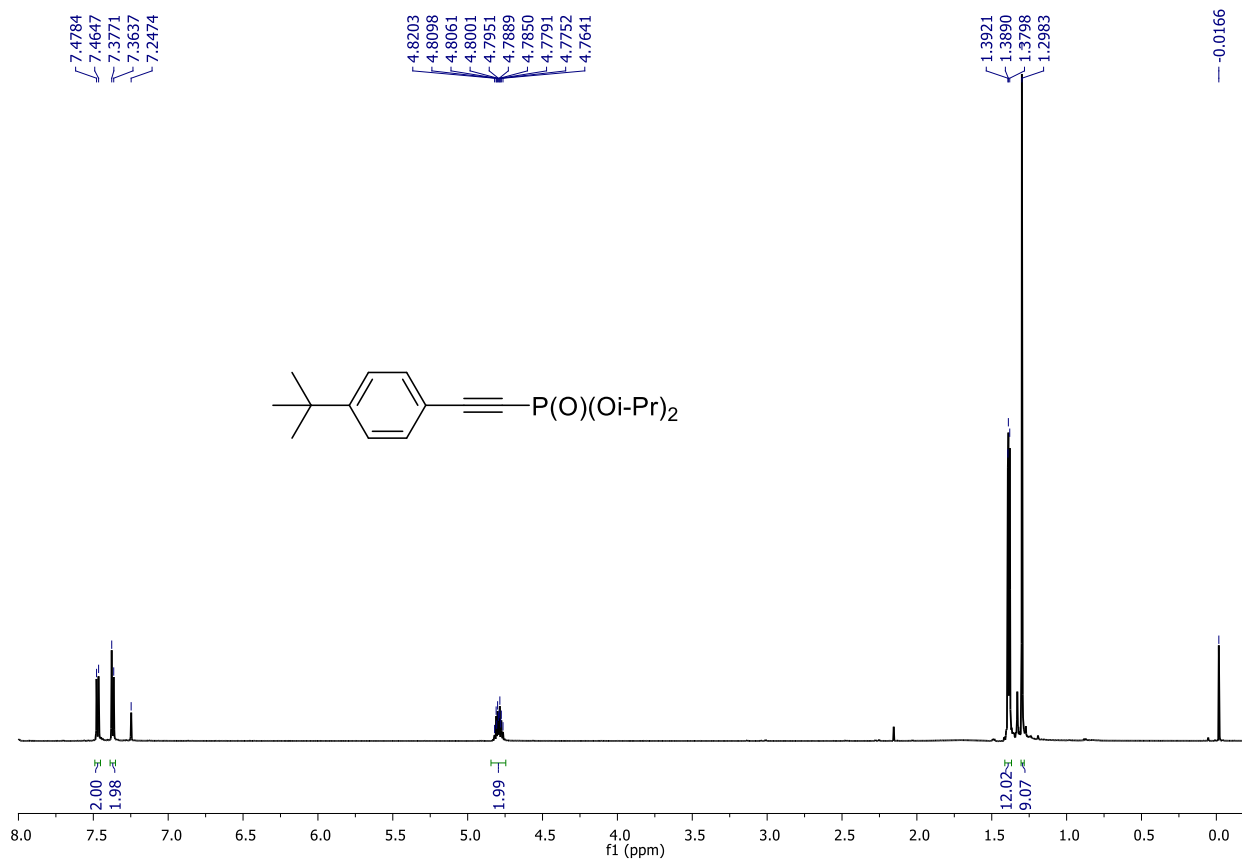

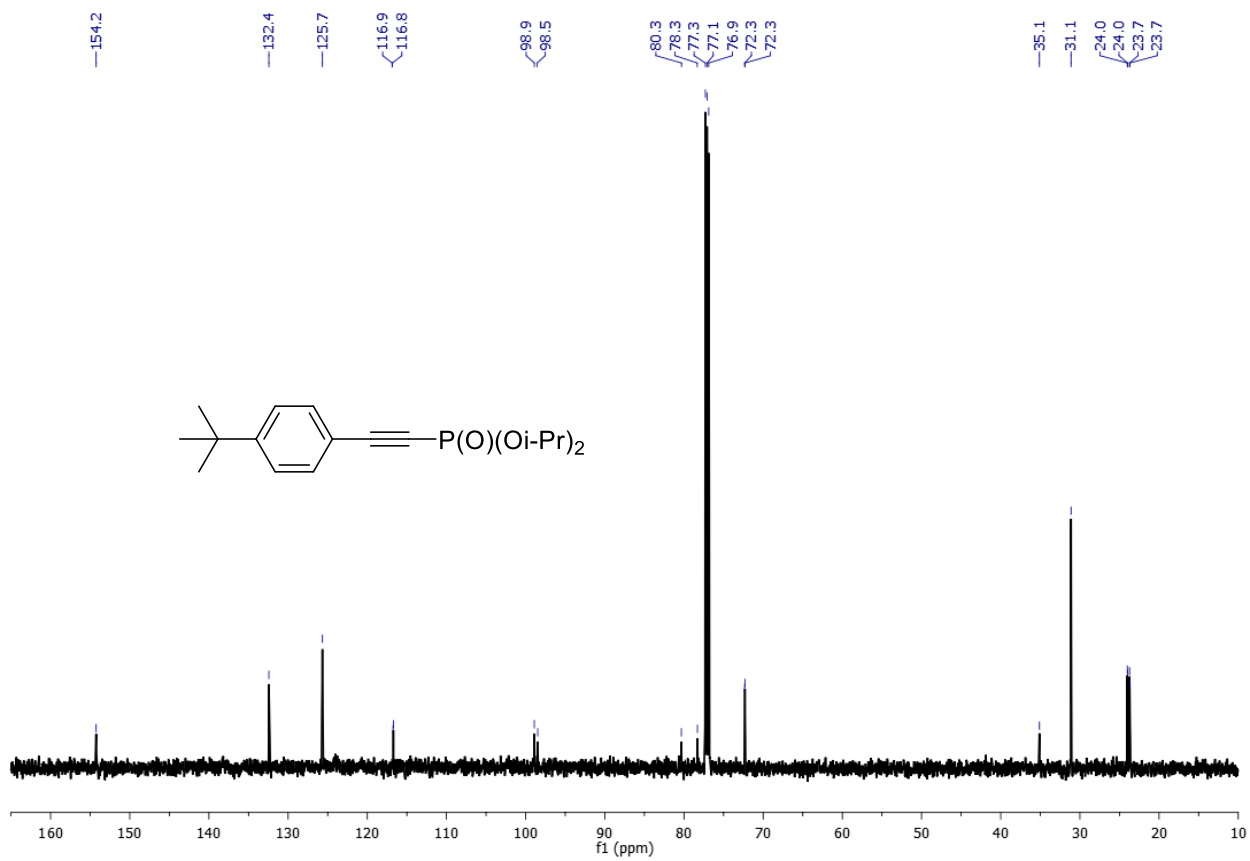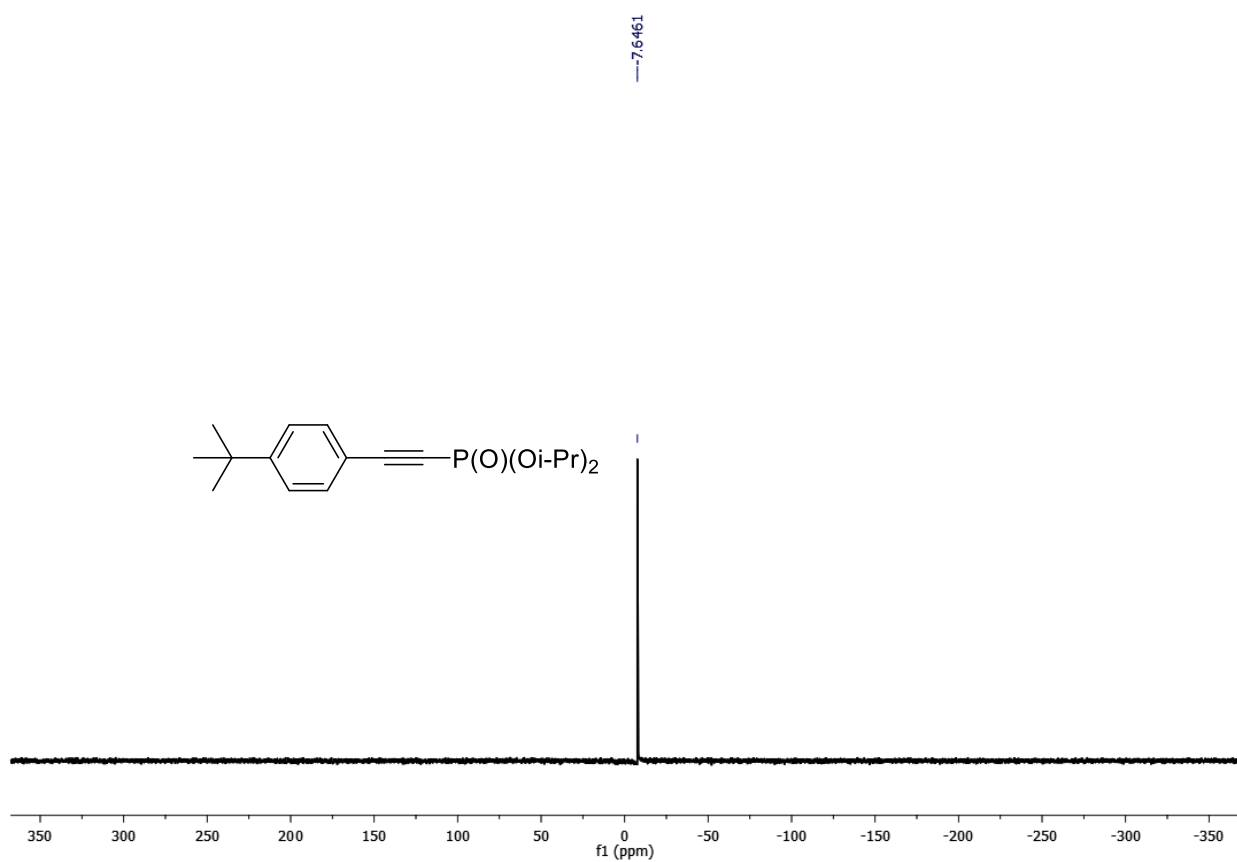

**Diisopropyl [(4-tert-butylphenyl)ethynyl]phosphonate (4f):**

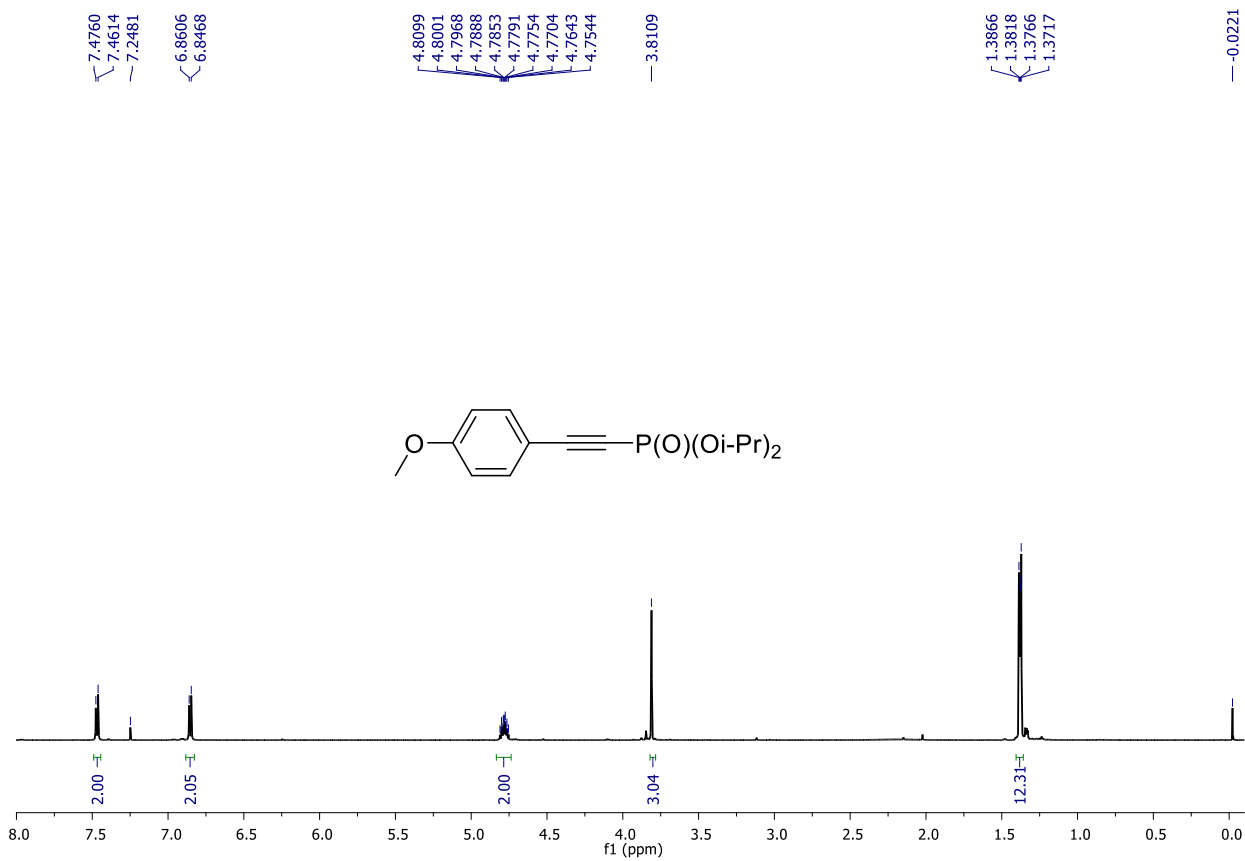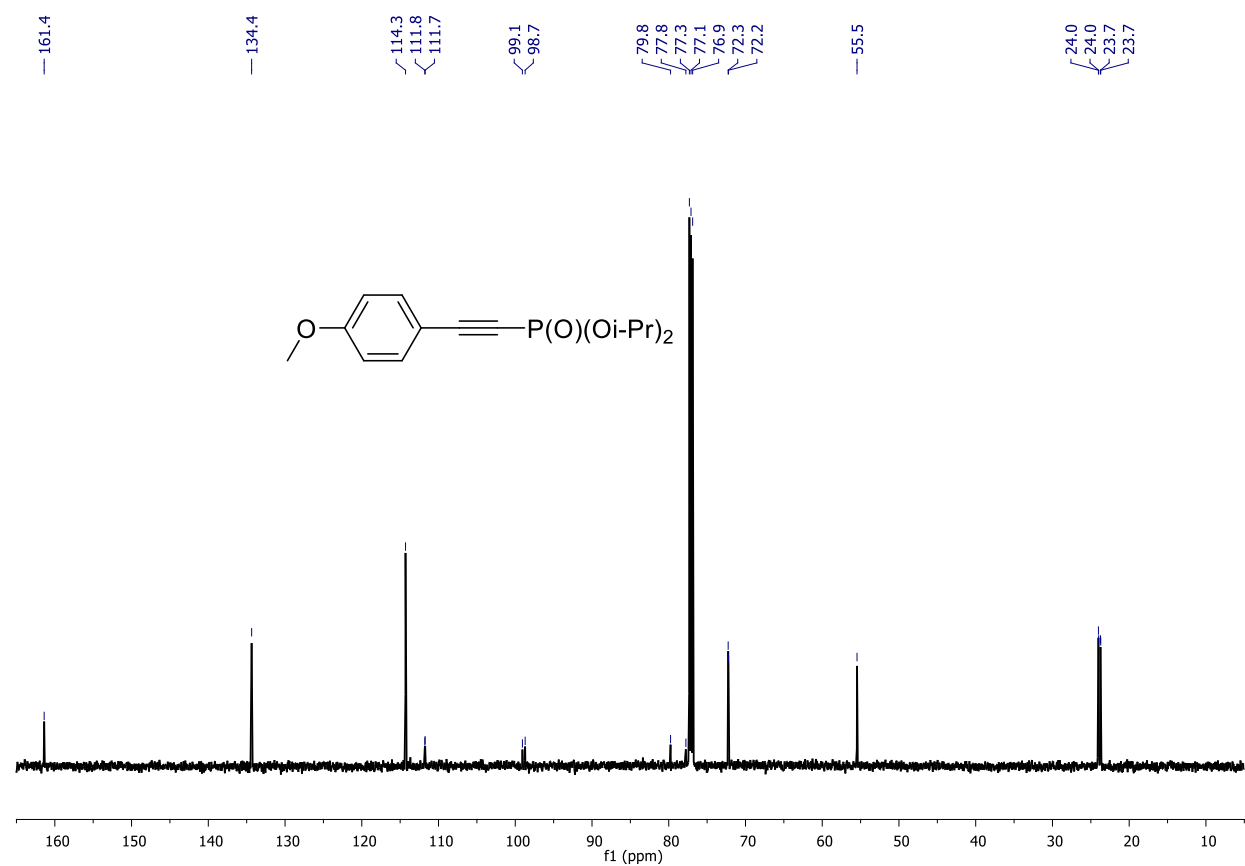

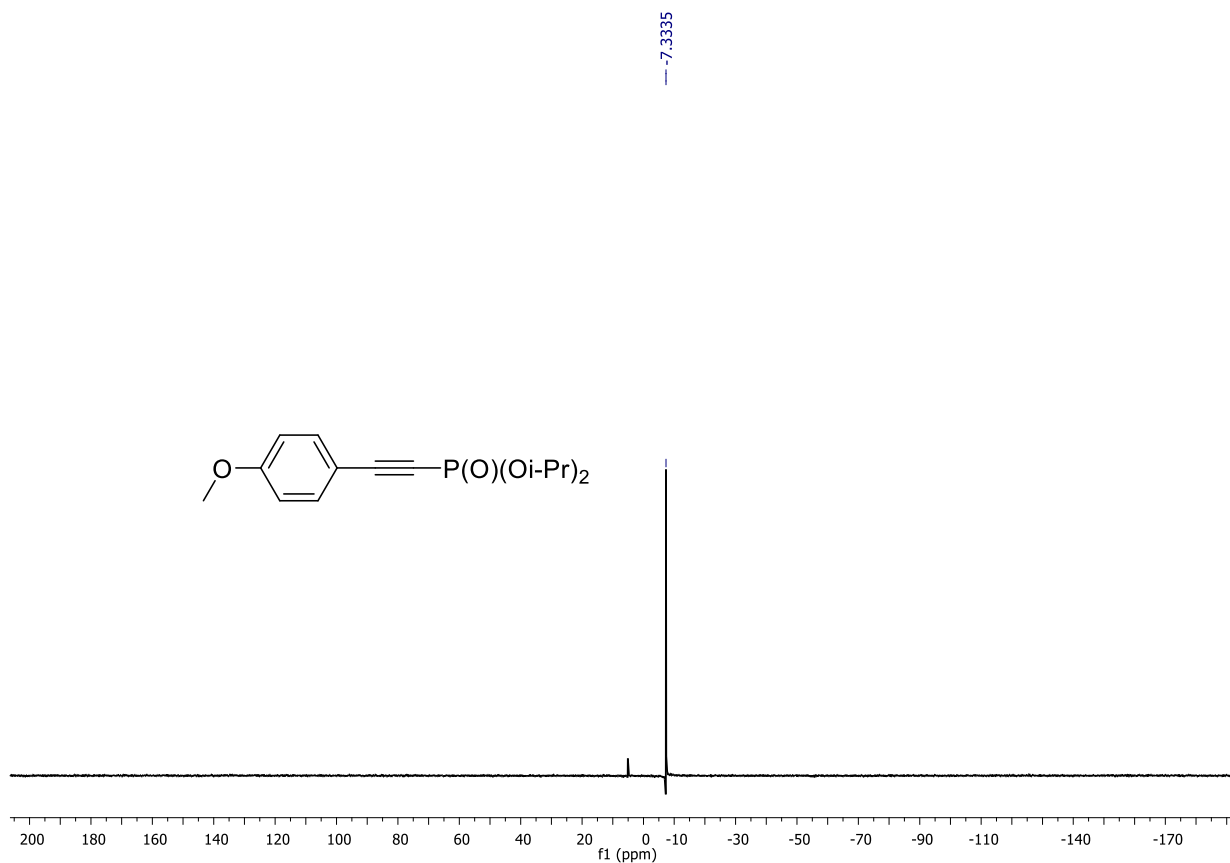

**Diisopropyl [(4-N, N dimethylaminophenyl)ethynyl]phosphonate (4g):**

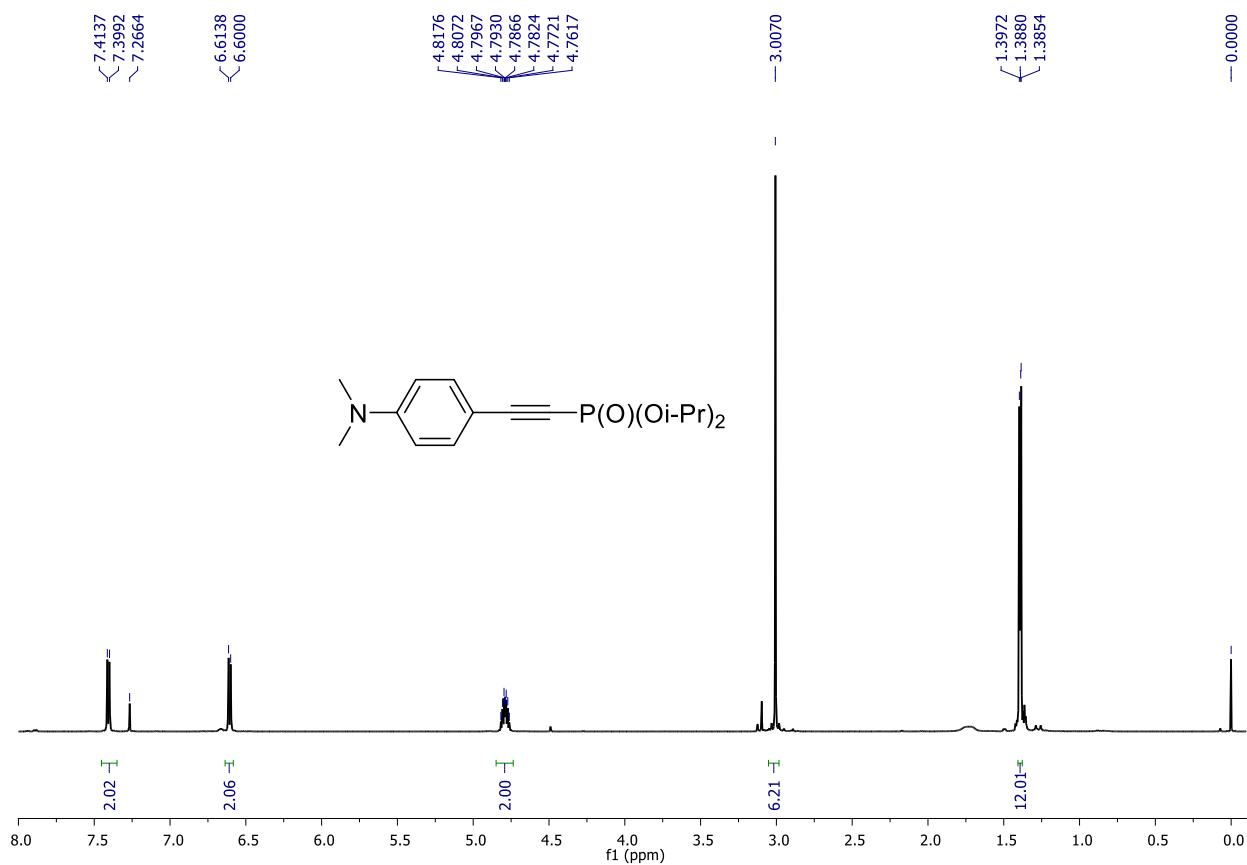



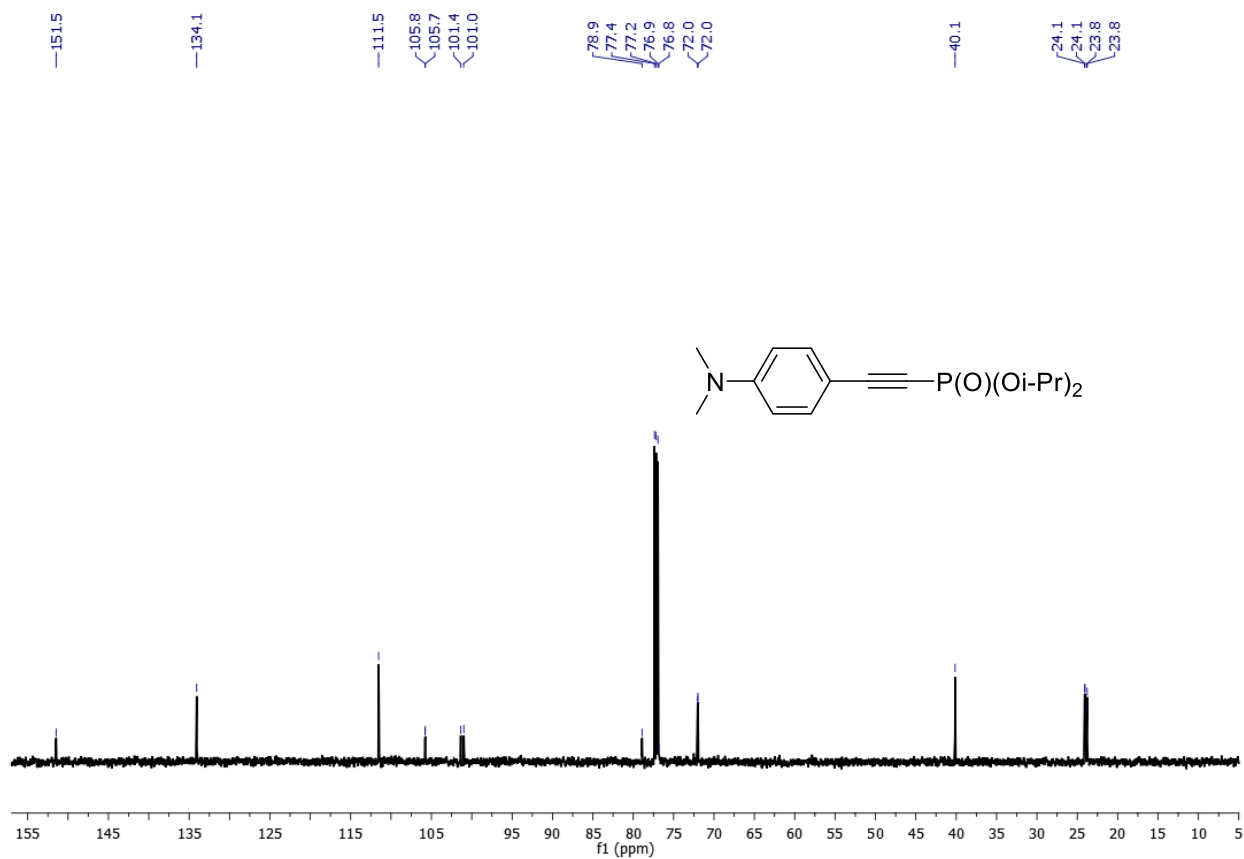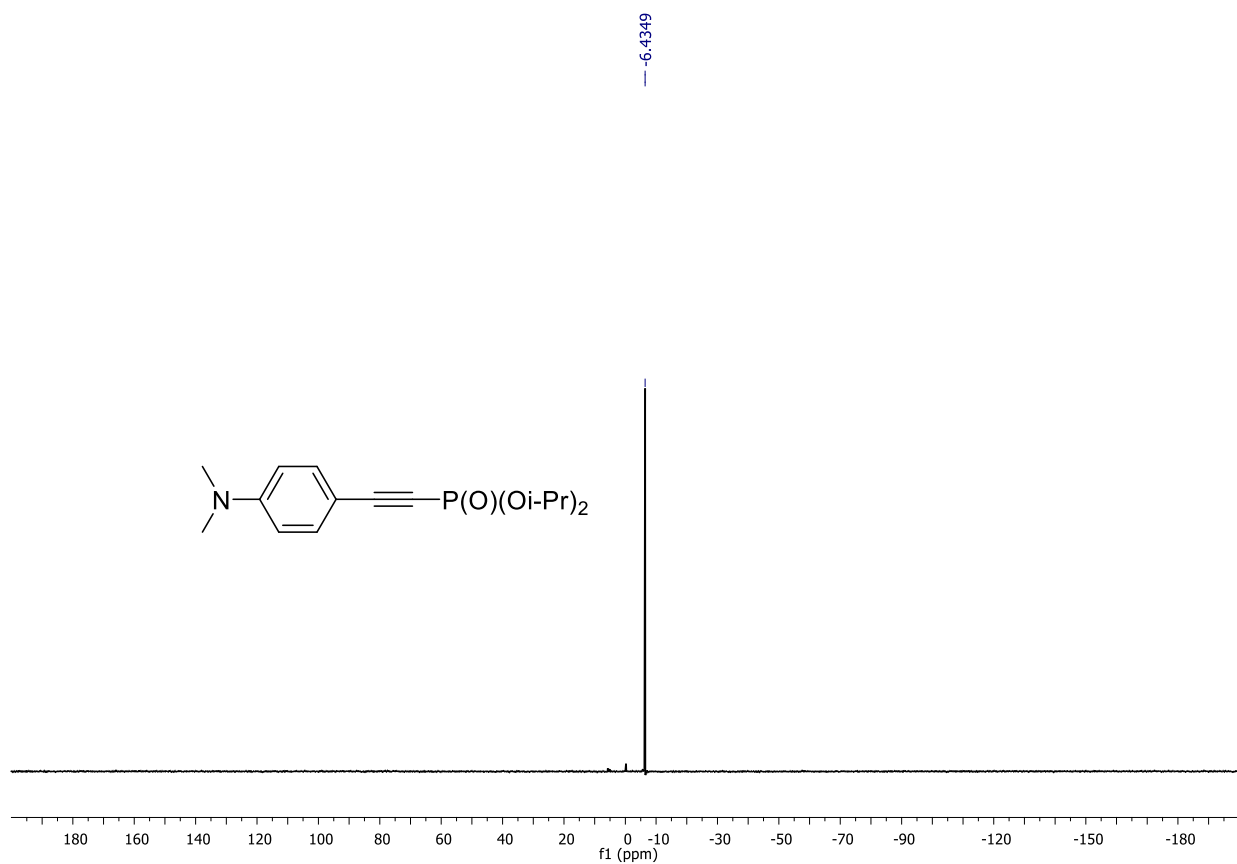

**Diisopropyl [(4-cyanophenyl)ethynyl]phosphonate (4h):**

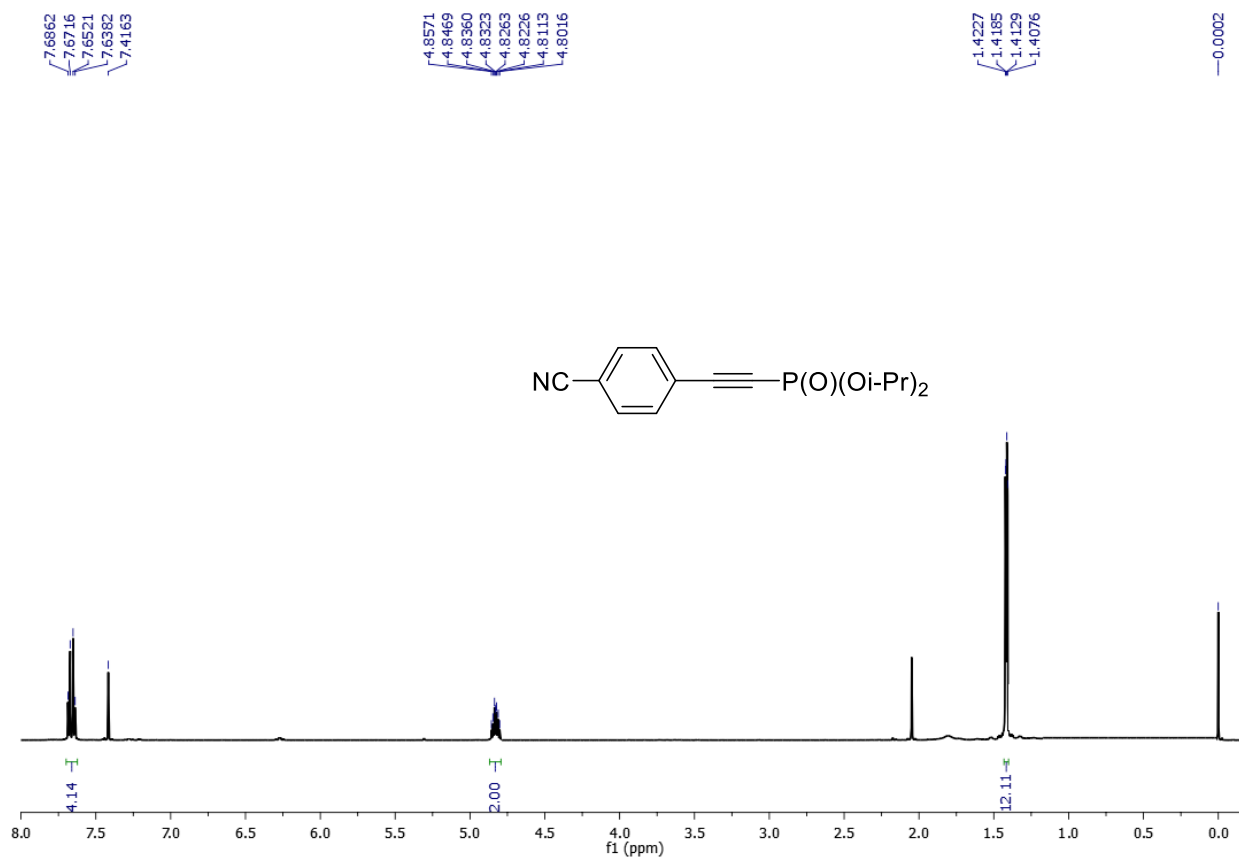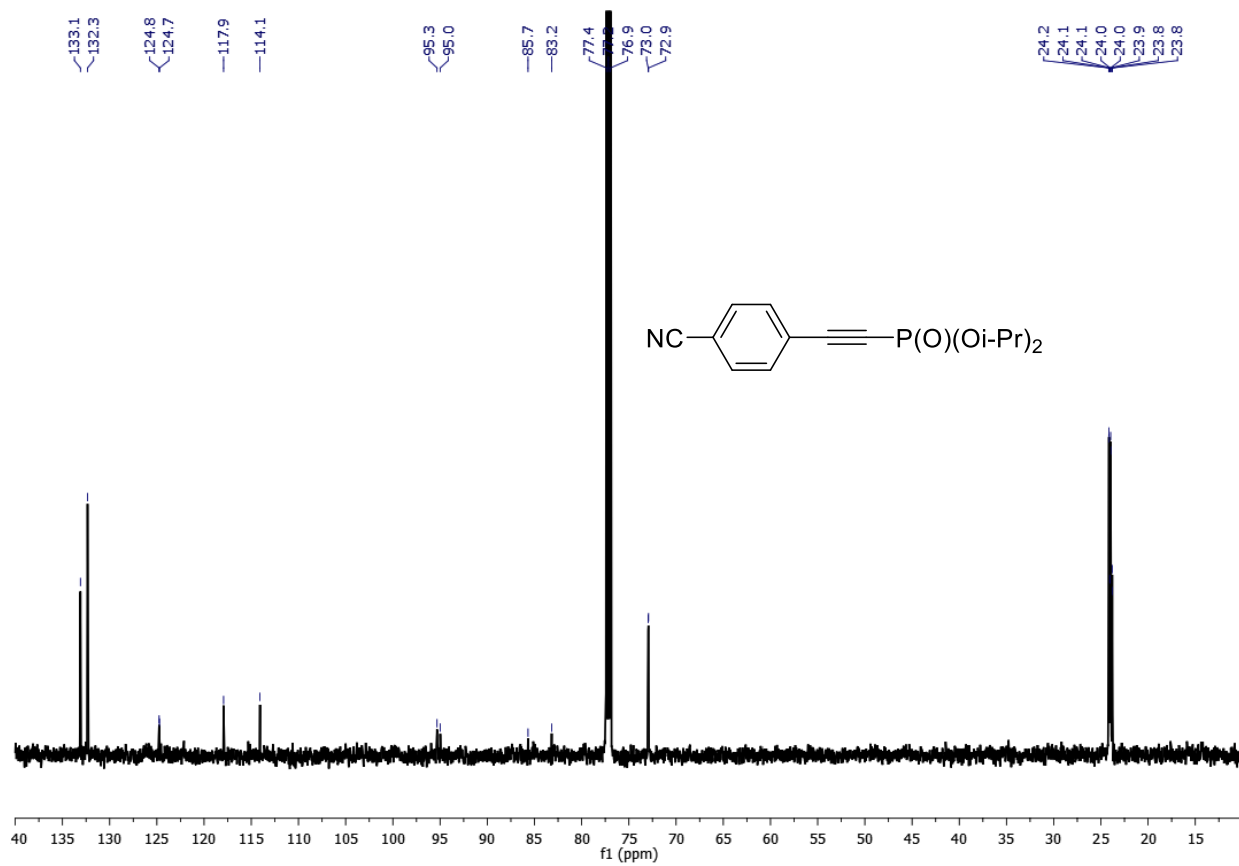

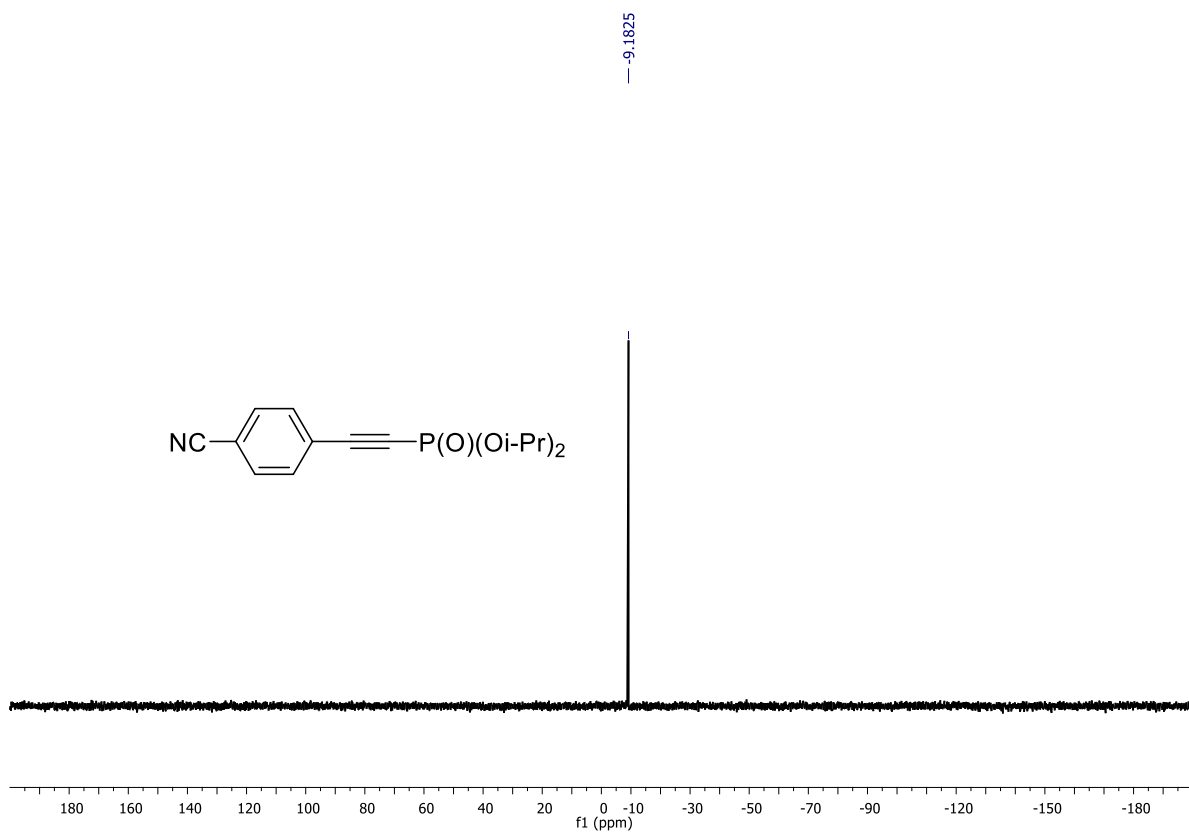

**Diisopropyl [(2-trifluoromethylbenzene)ethynyl]phosphonate (4i):**

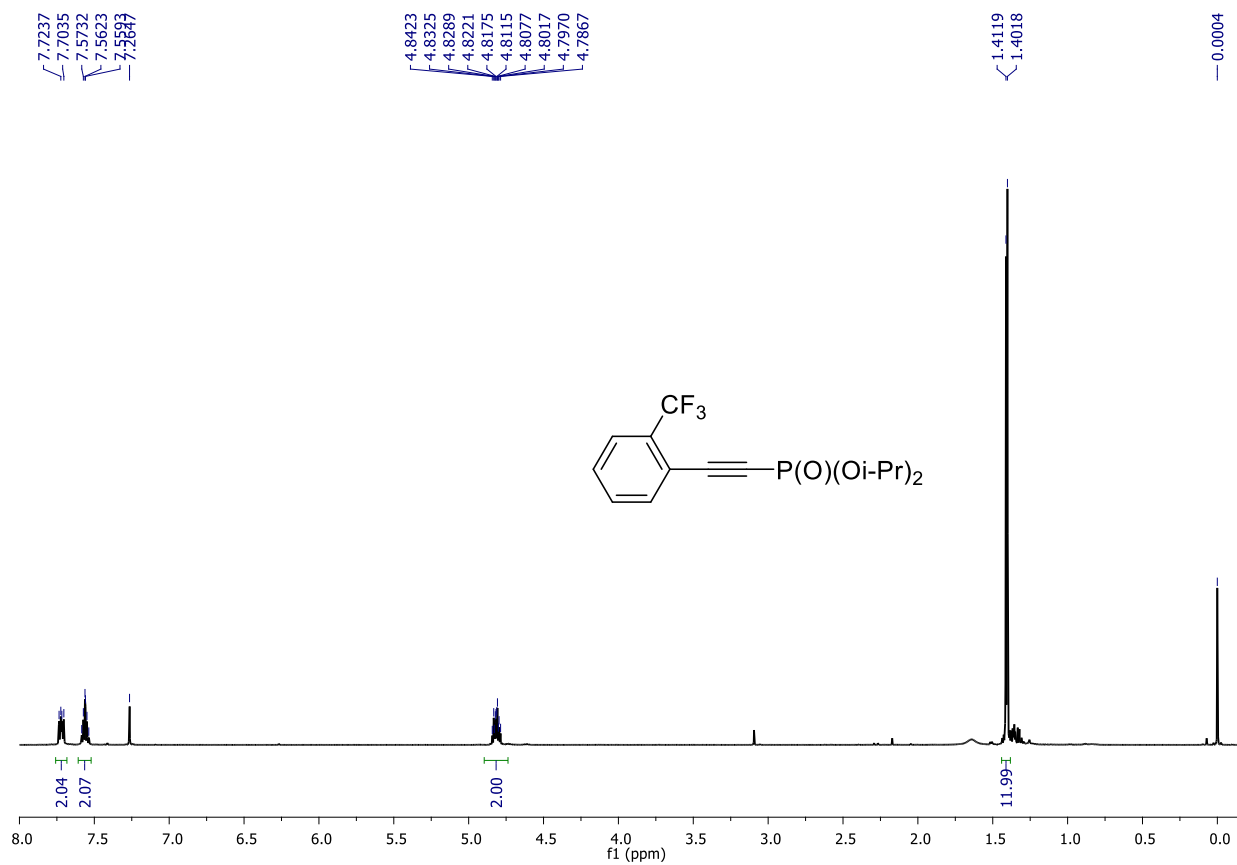

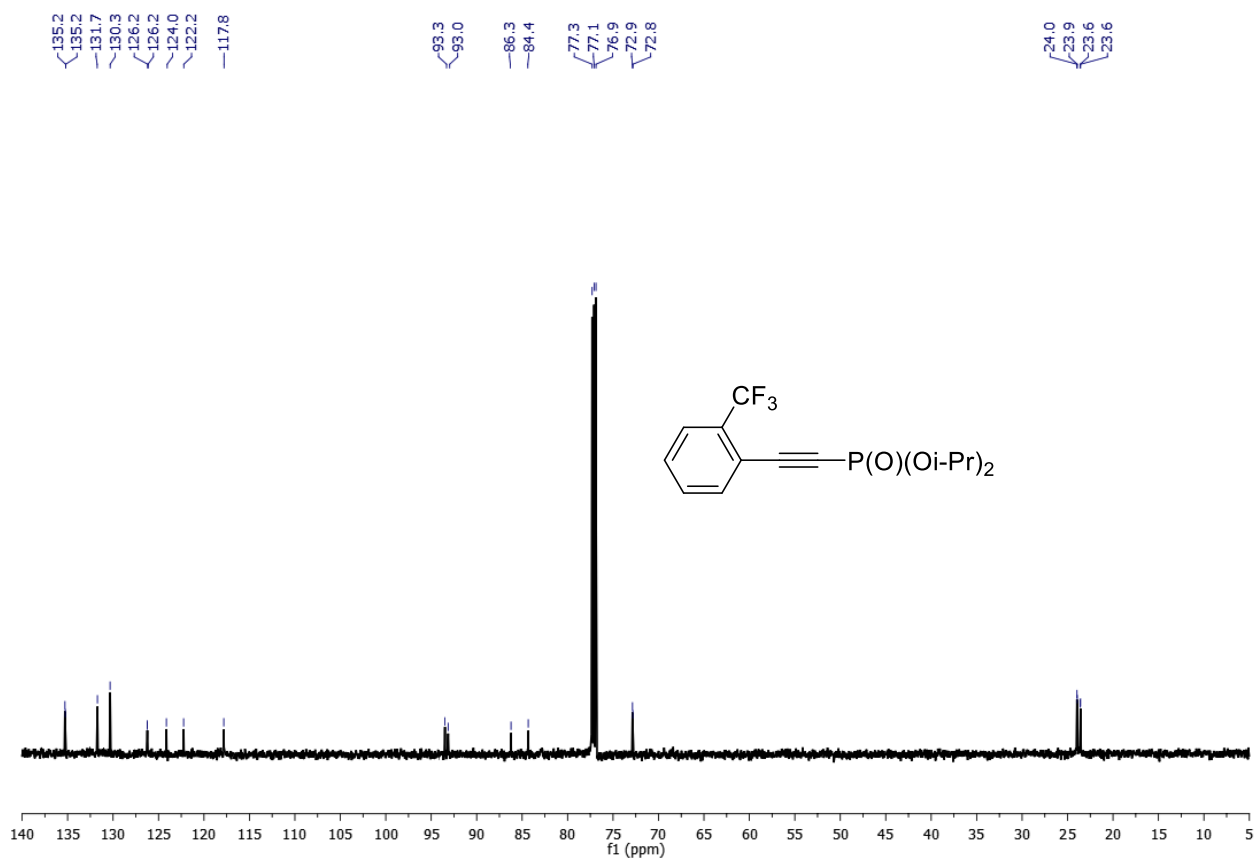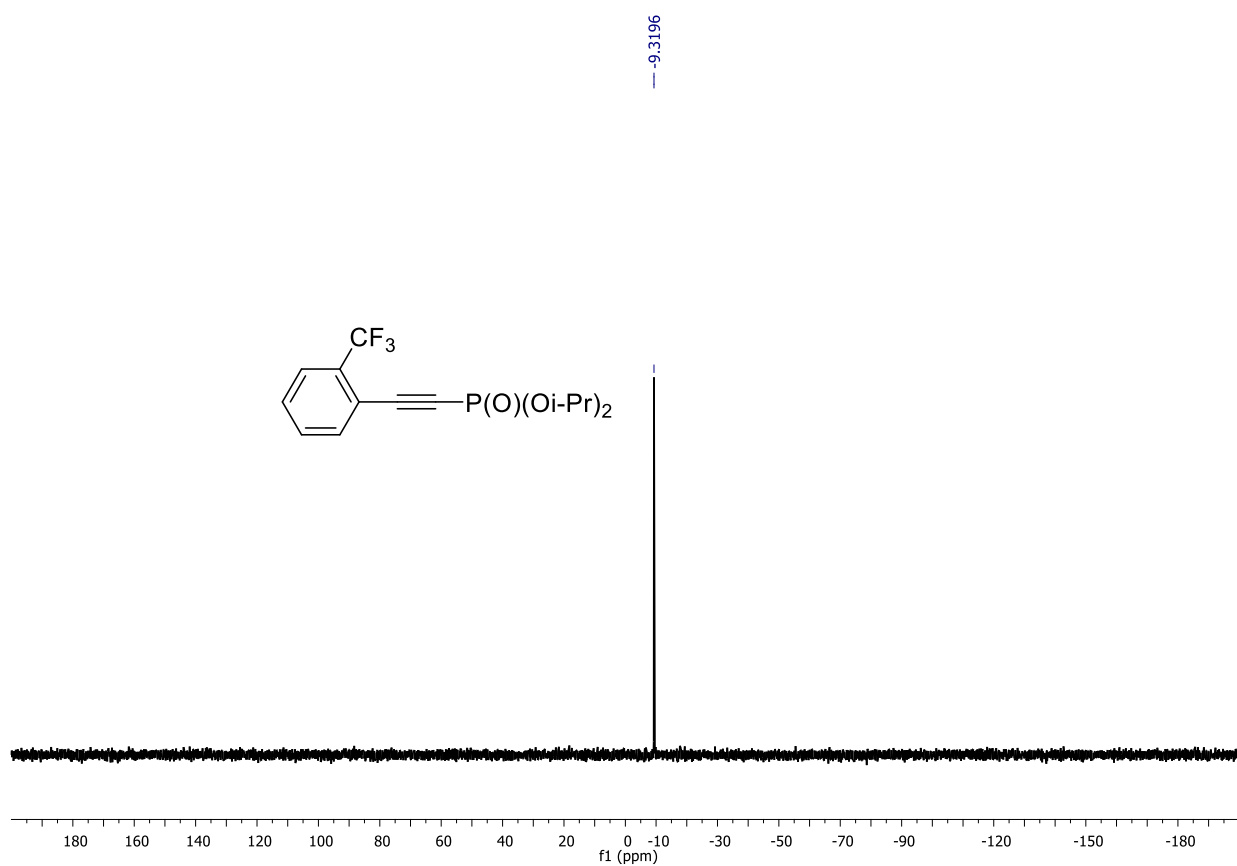

**Diisopropyl [(2-chlorophenyl)ethynyl]phosphonate (4j):**

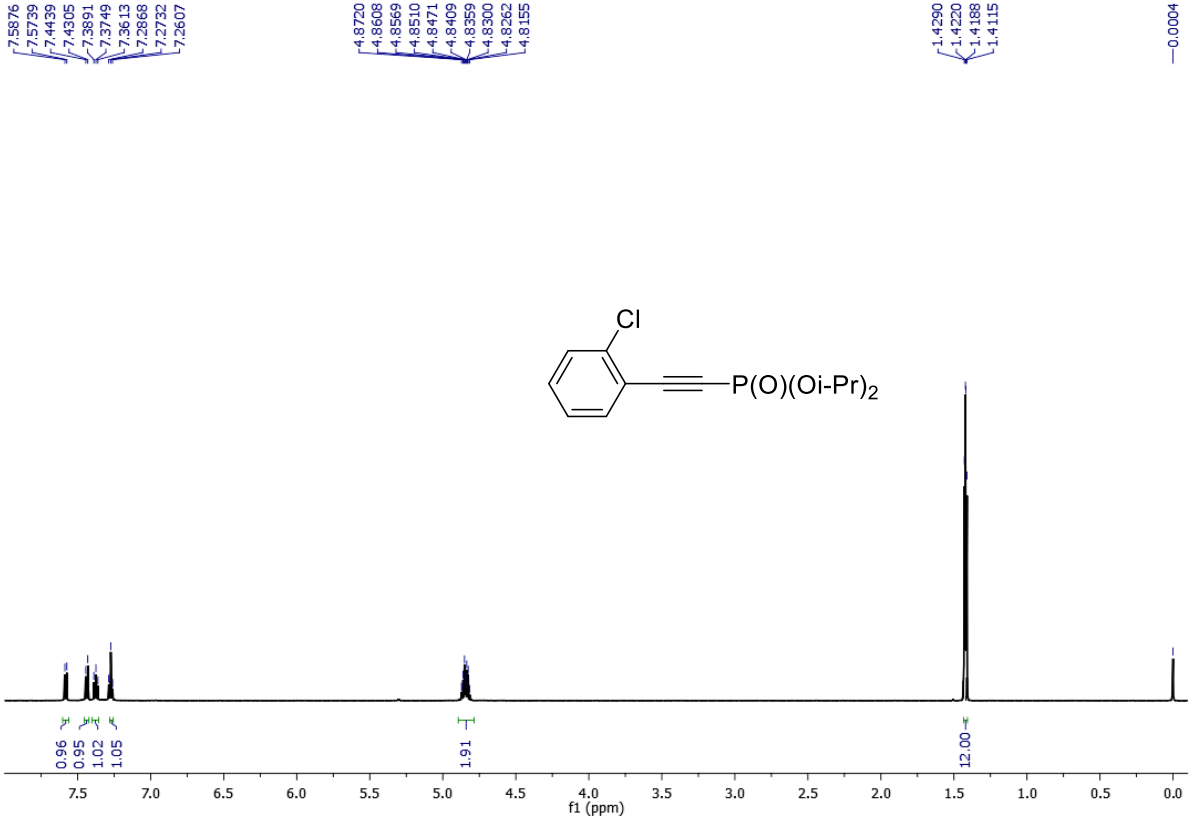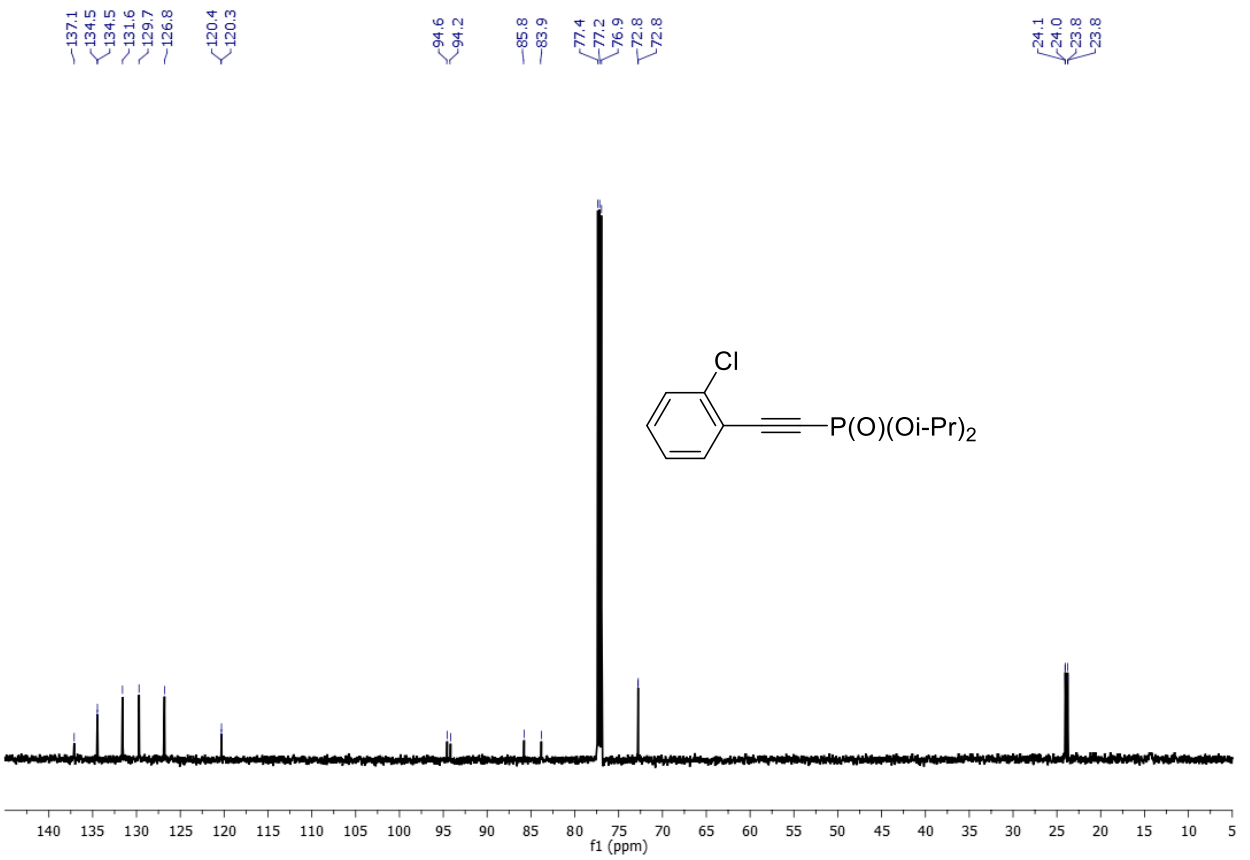

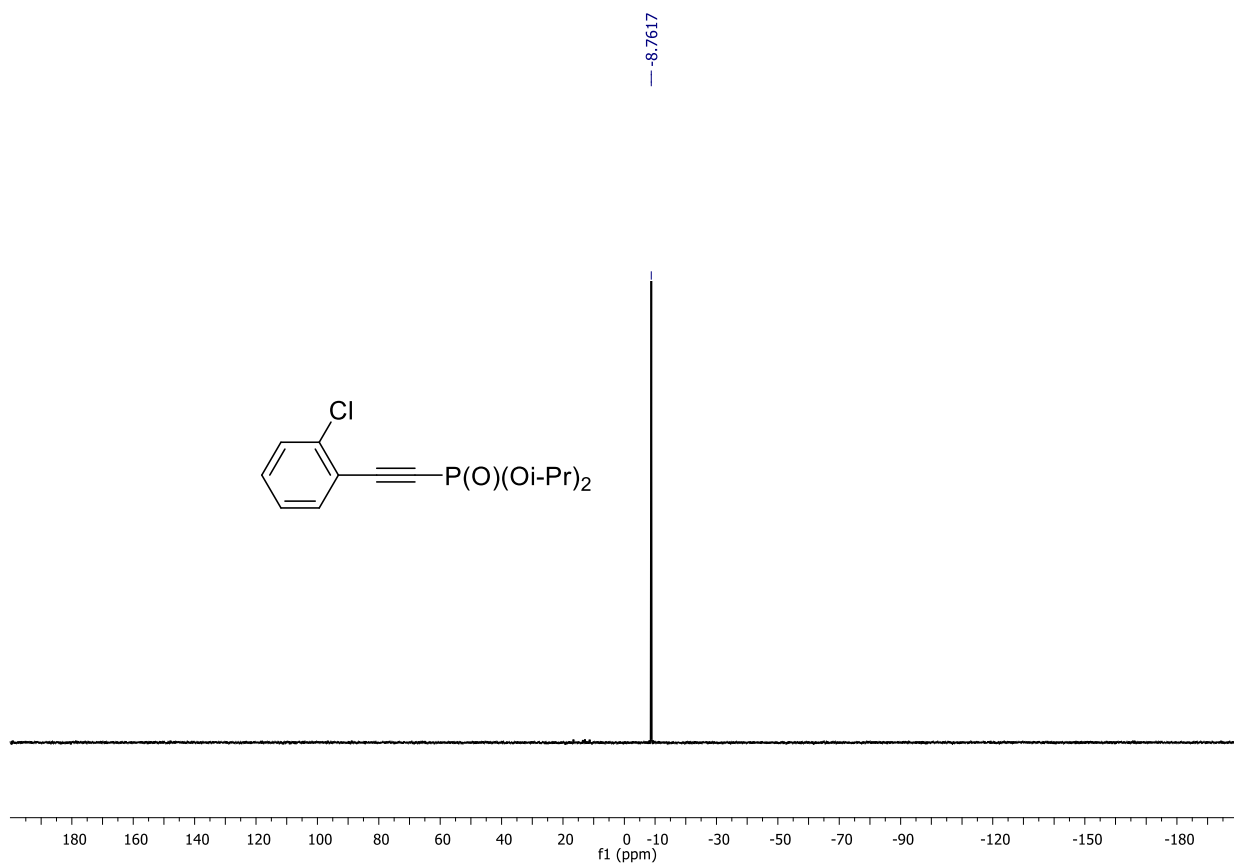

**Diisopropyl [(2-methoxyphenyl)ethynyl]phosphonate (4k):**

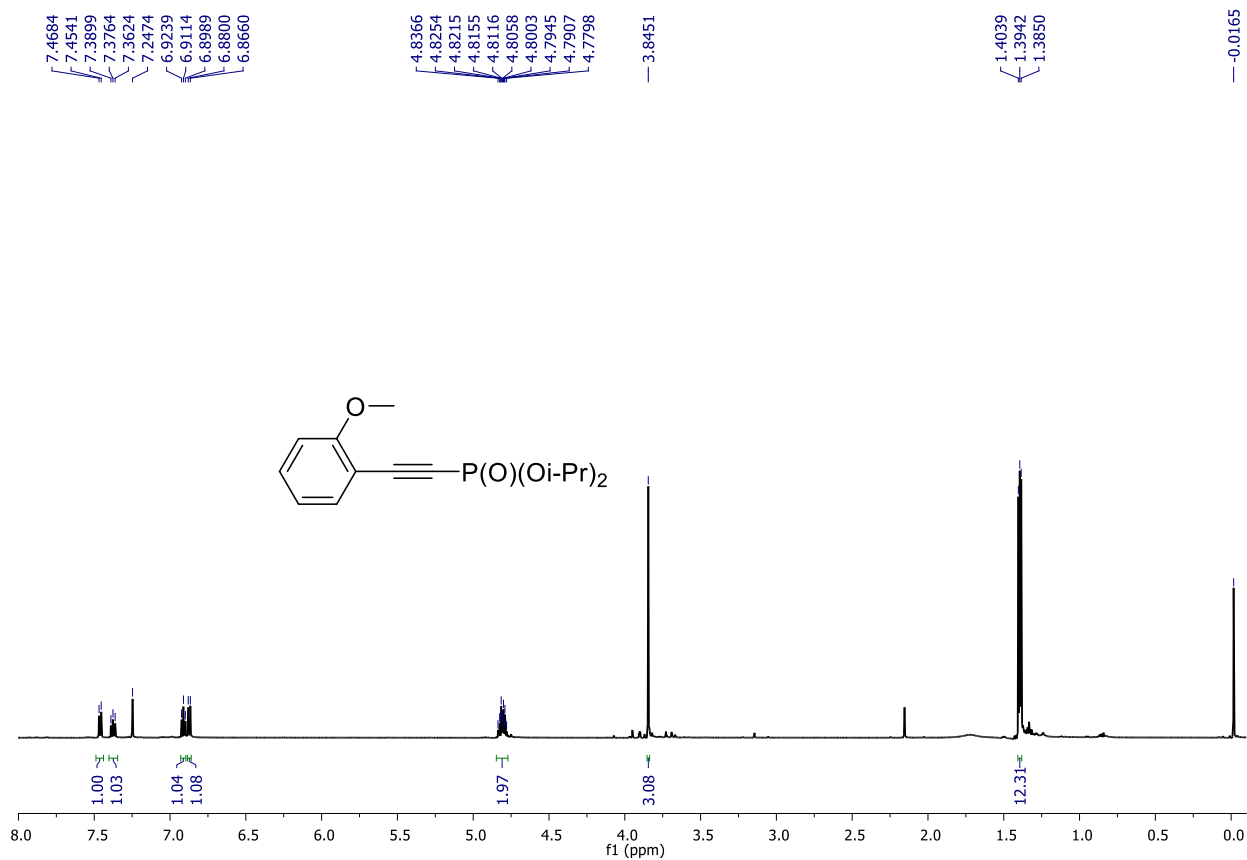

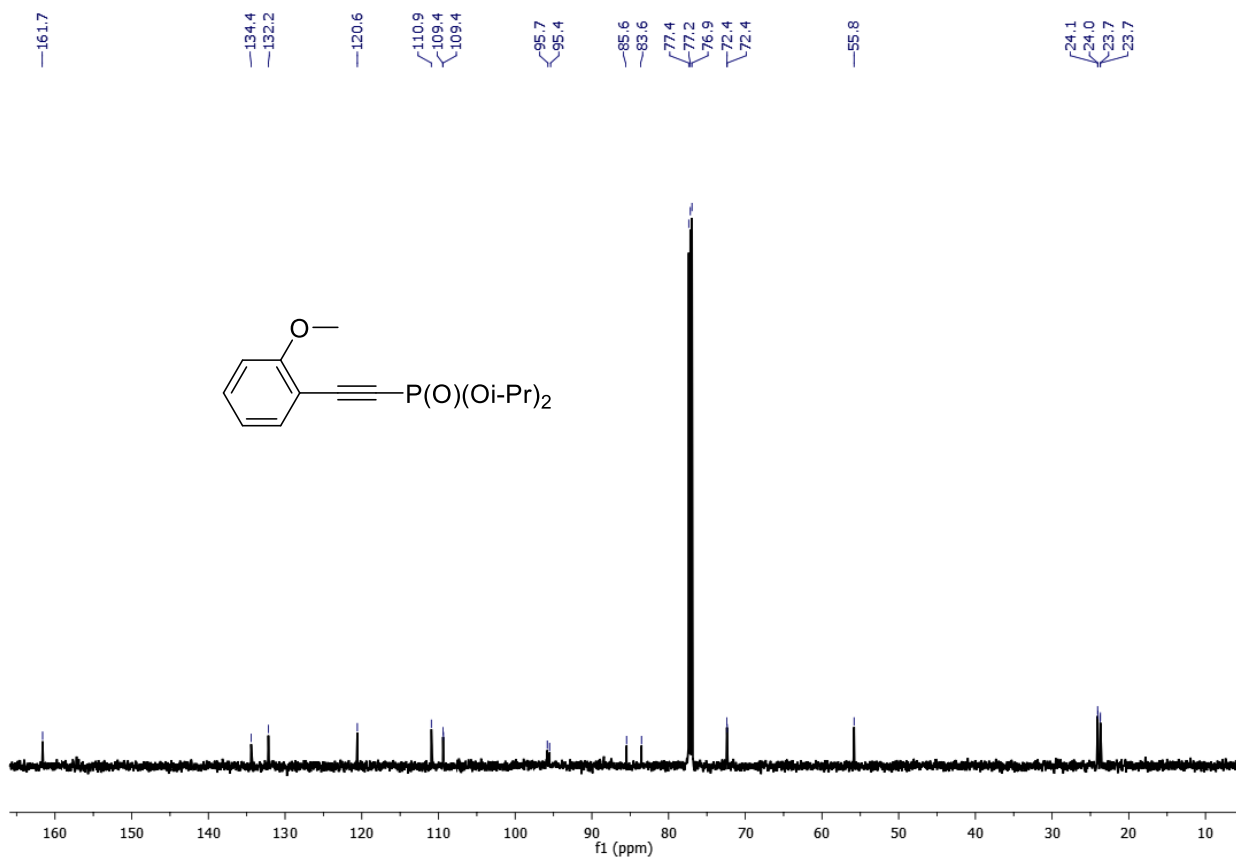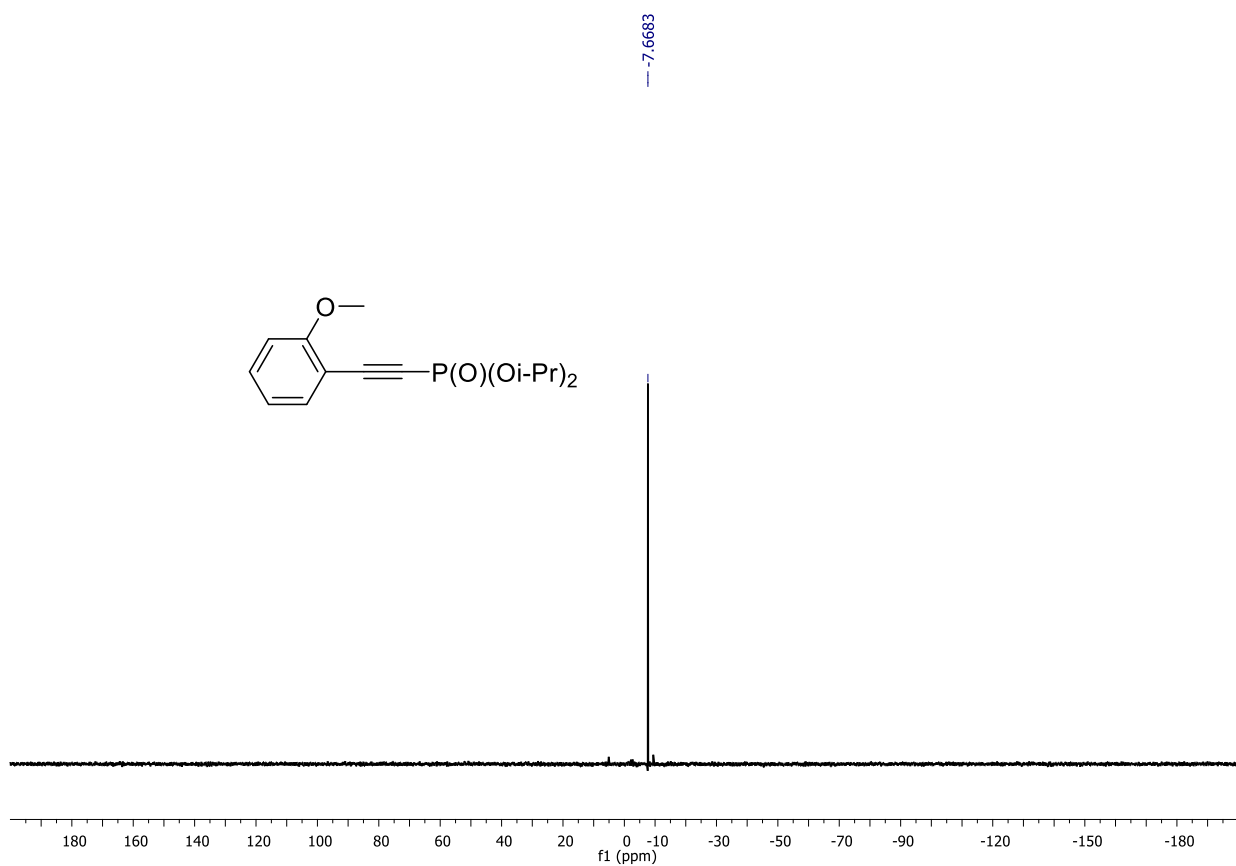

**Diisopropyl [(3-methylphenyl)ethynyl]phosphonate (4l):**

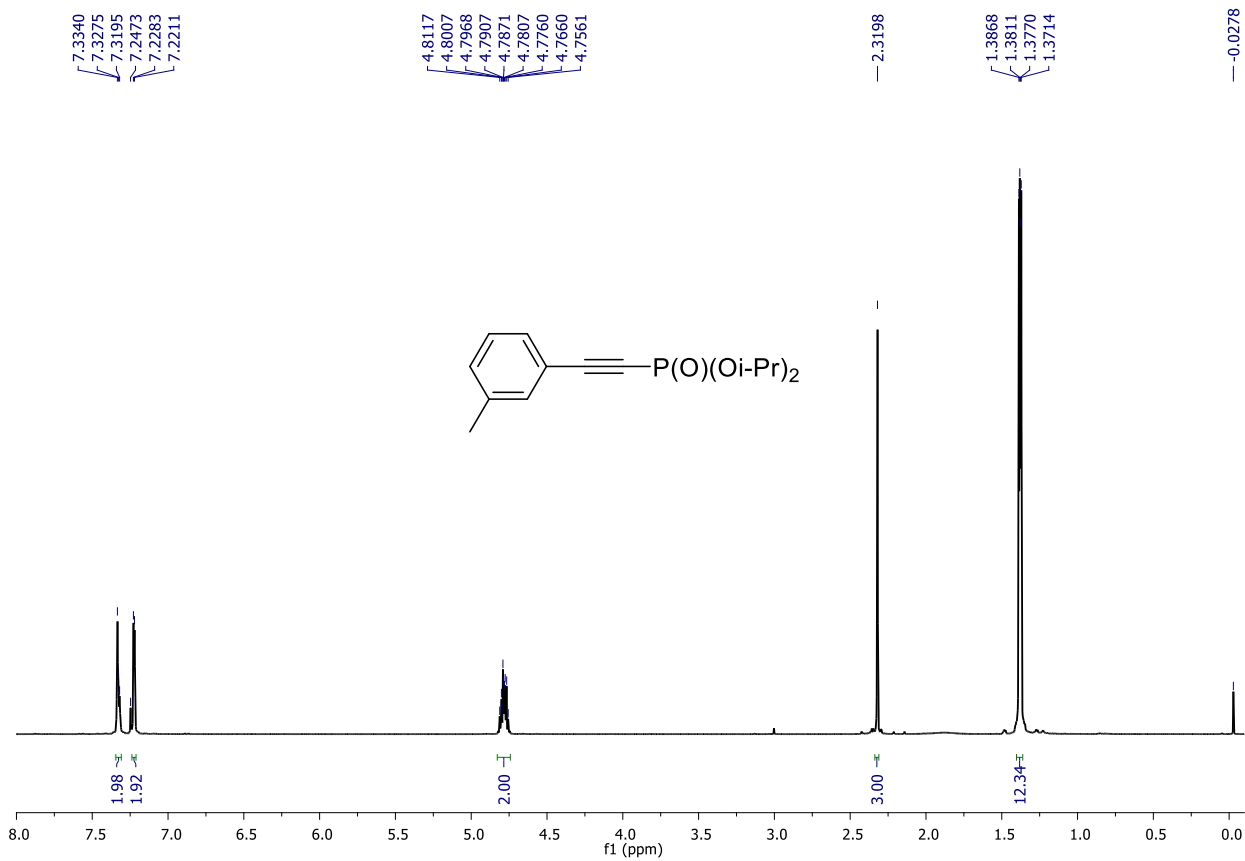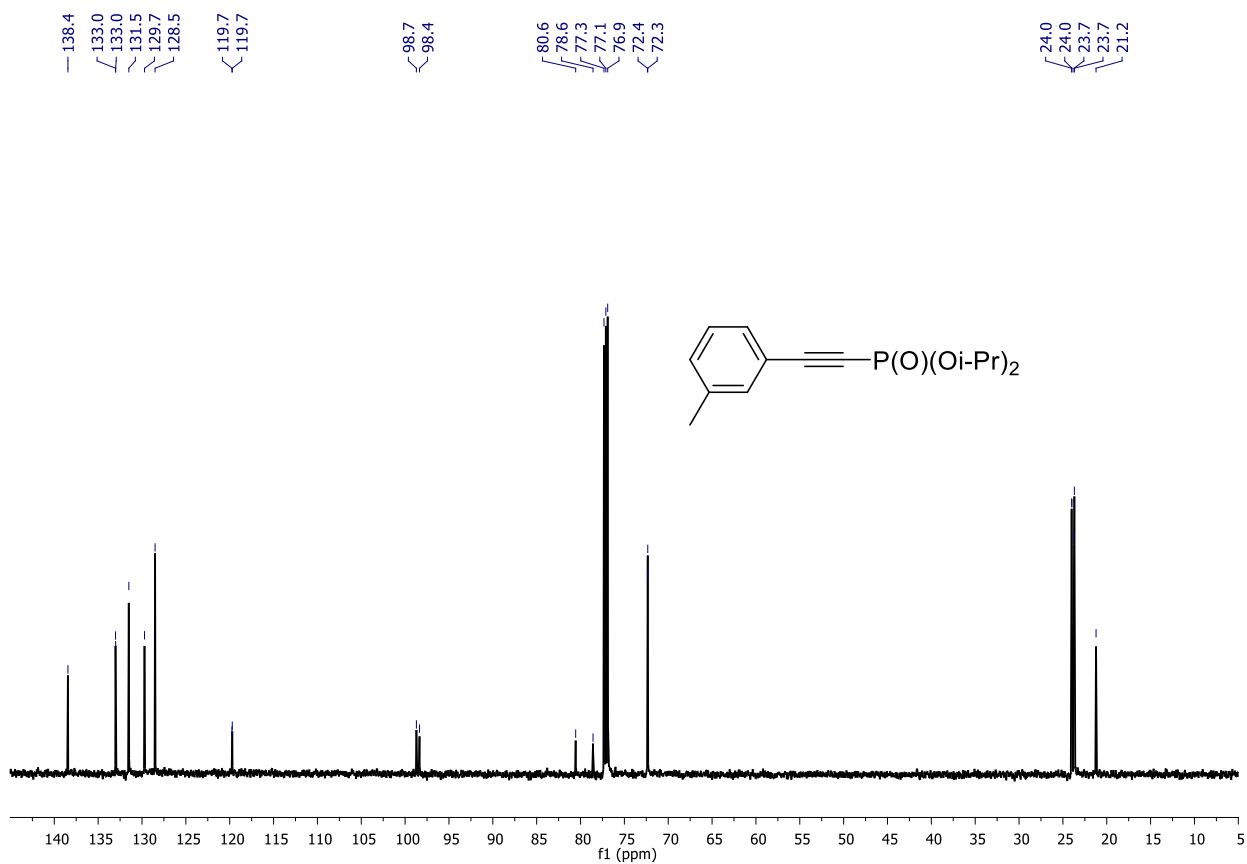



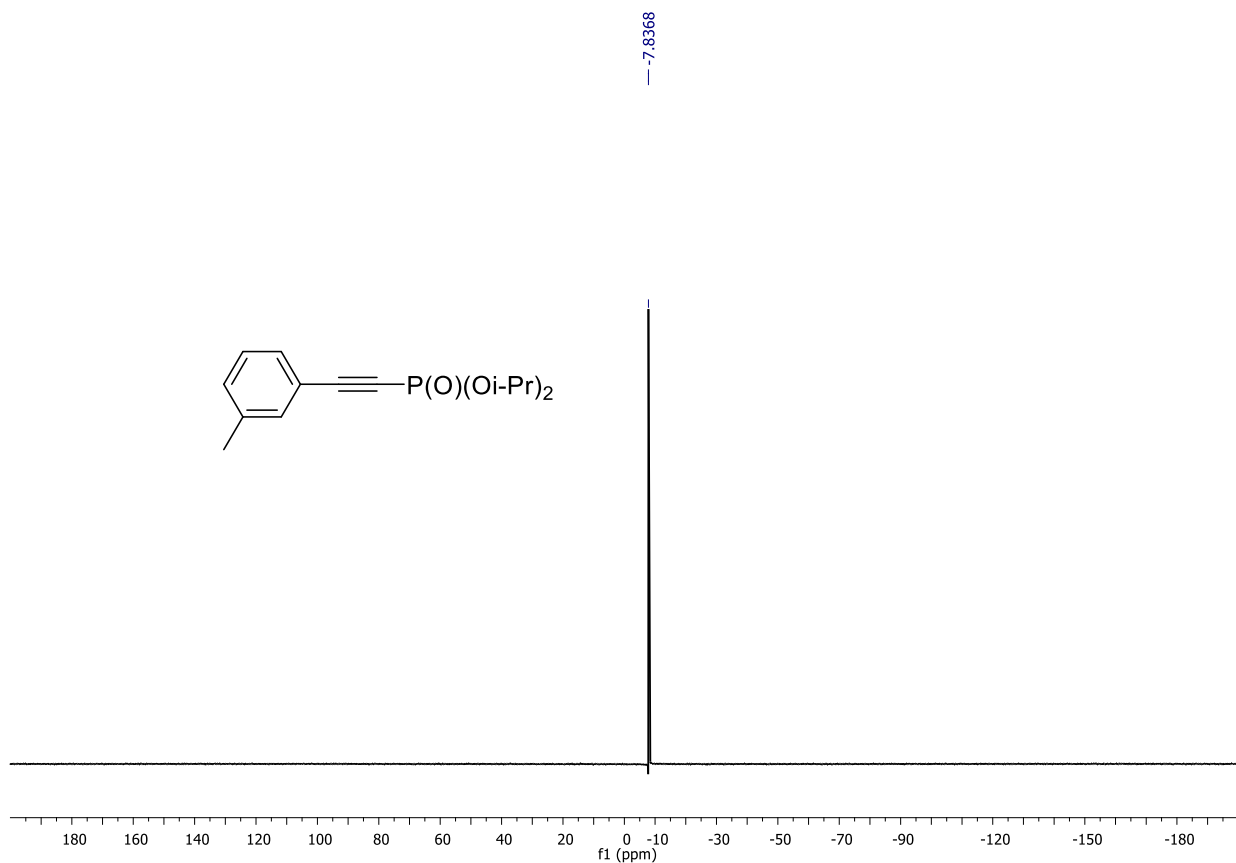

**Diisopropyl [(6-methoxynaphthalen-2-yl)ethynyl]phosphonate (4m):**

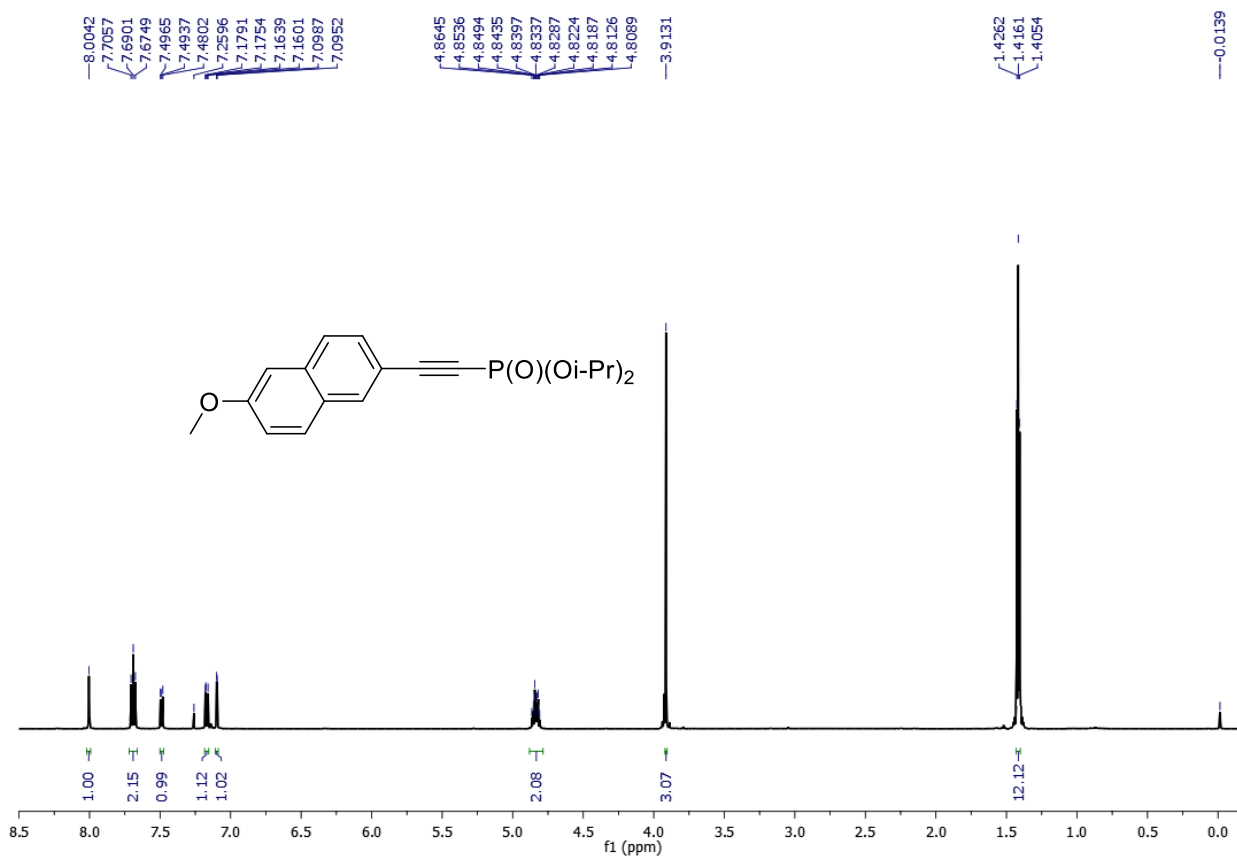

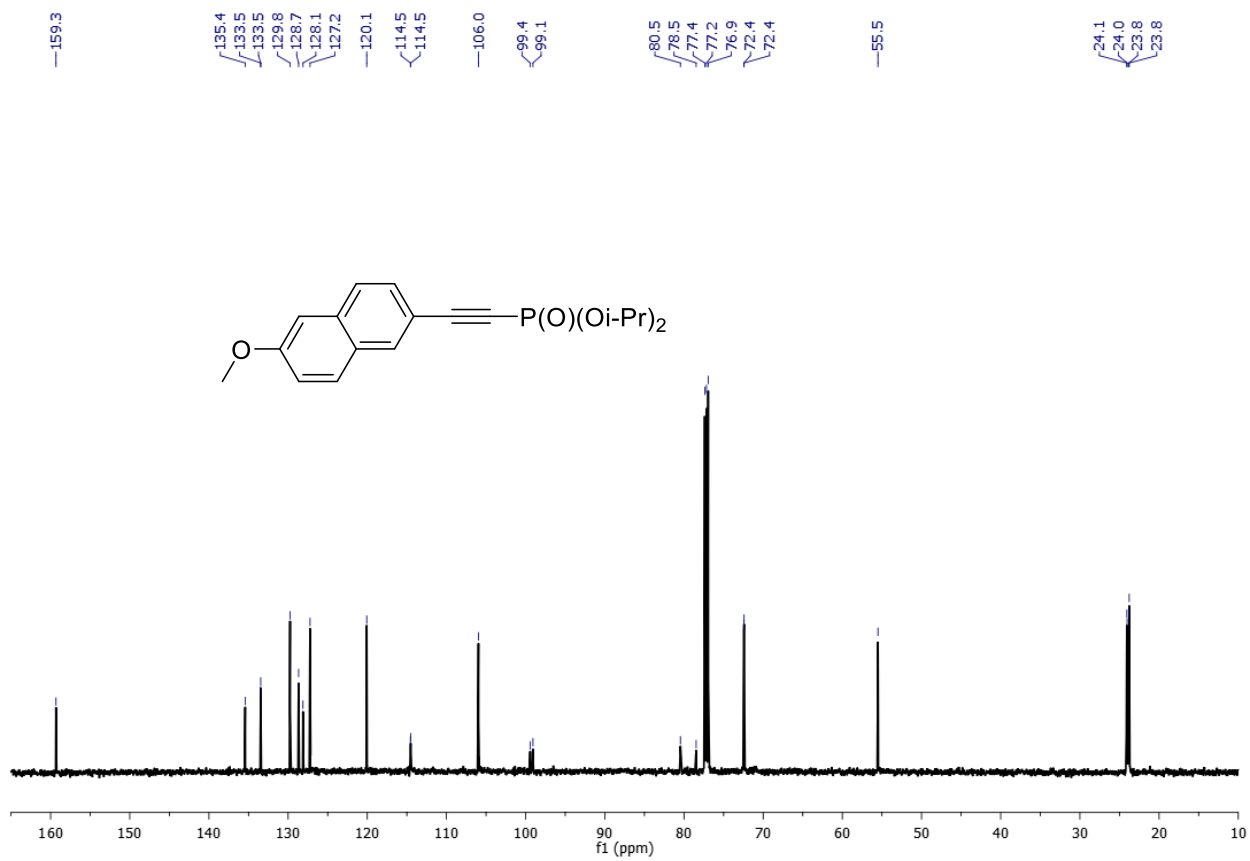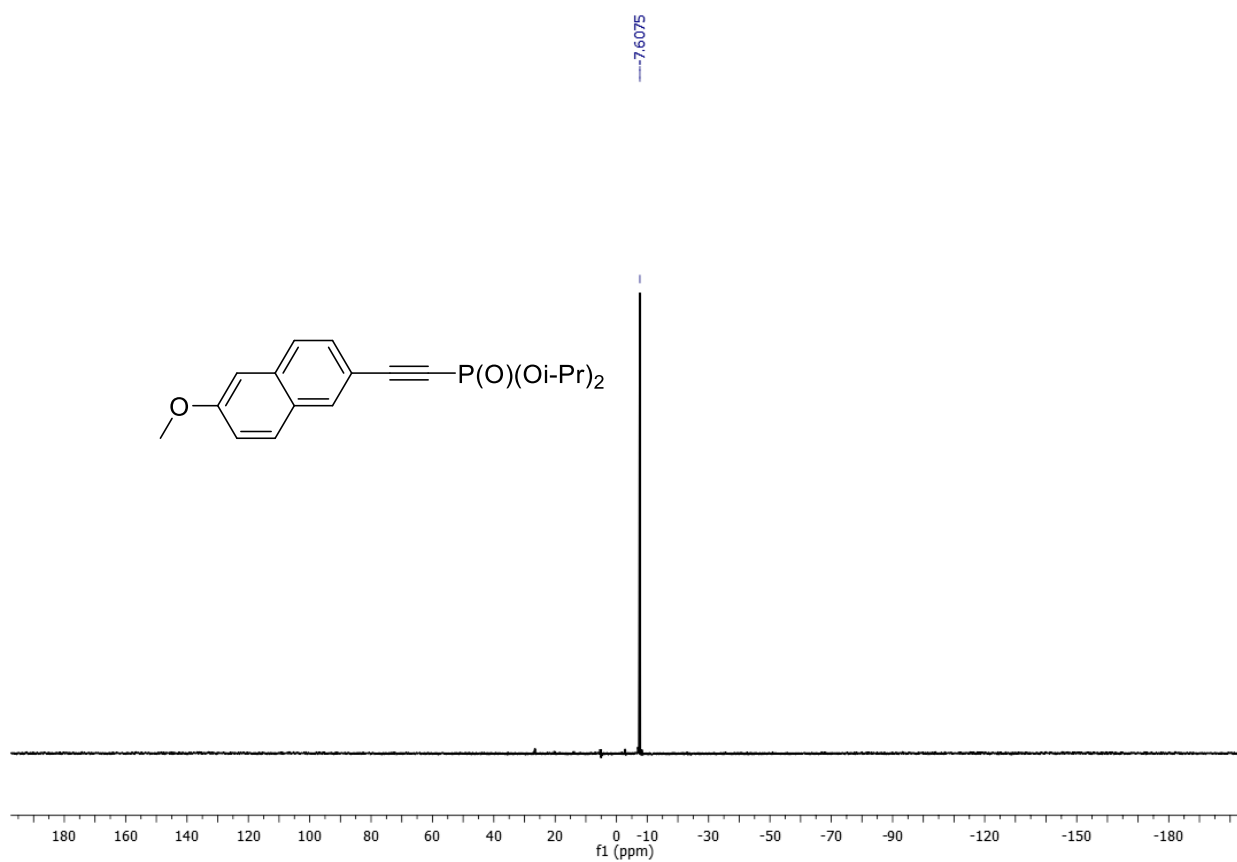

**Diisopropyl (pyridine-2-ylethynyl)phosphonate (4n):**

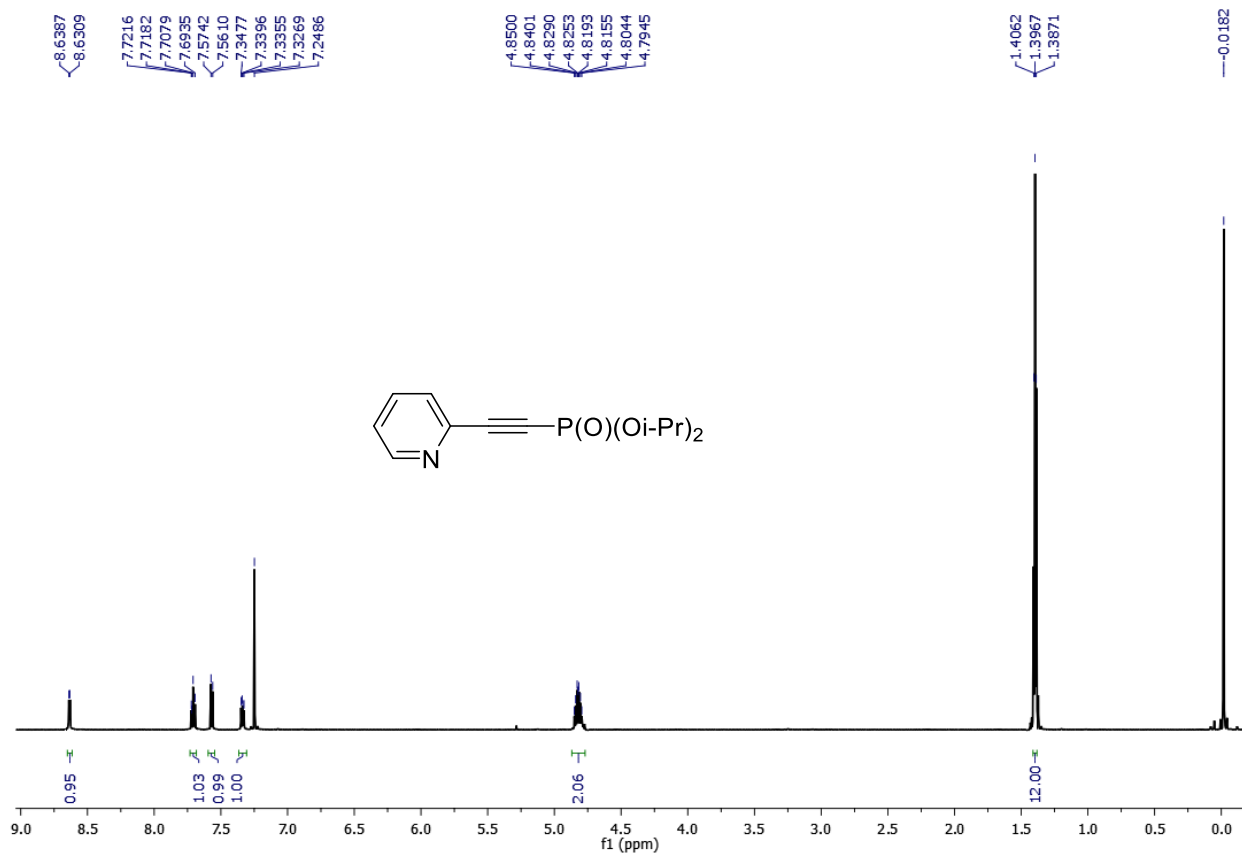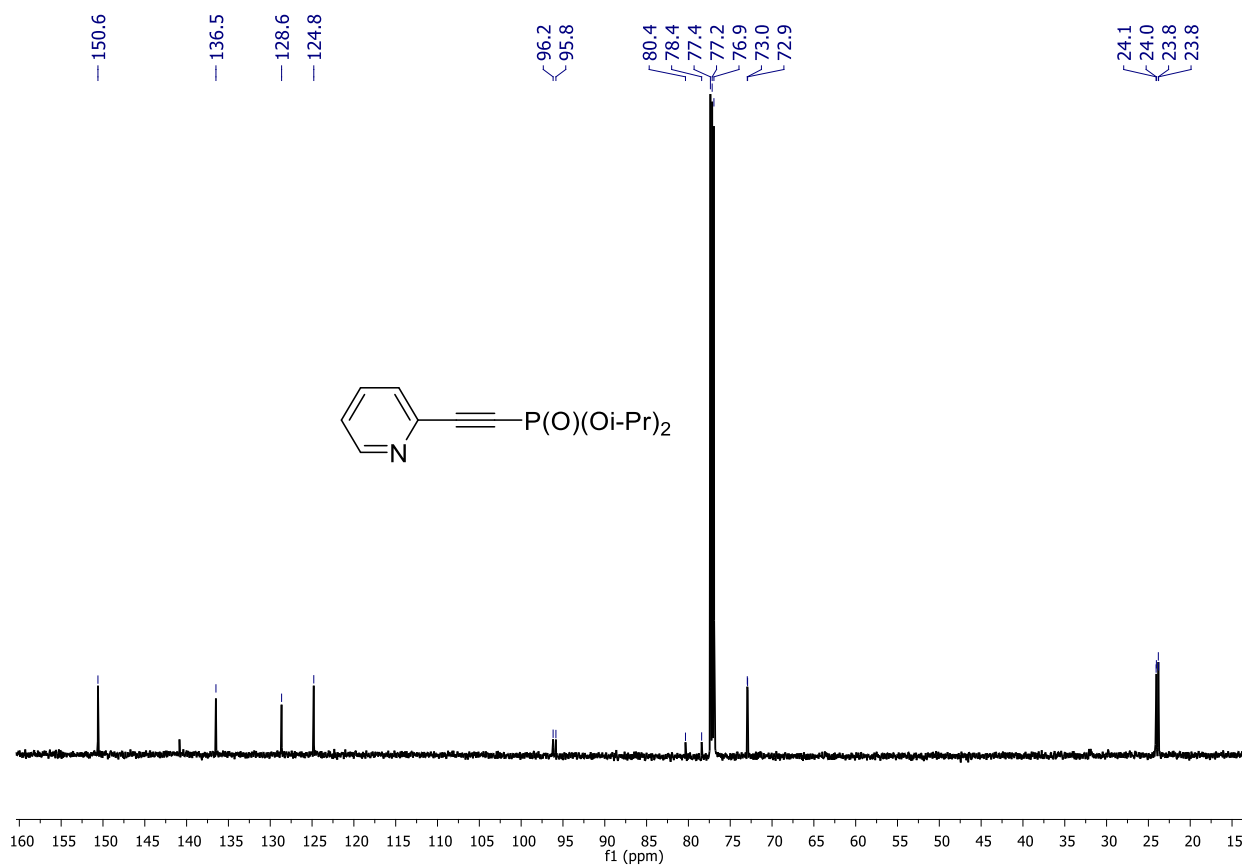

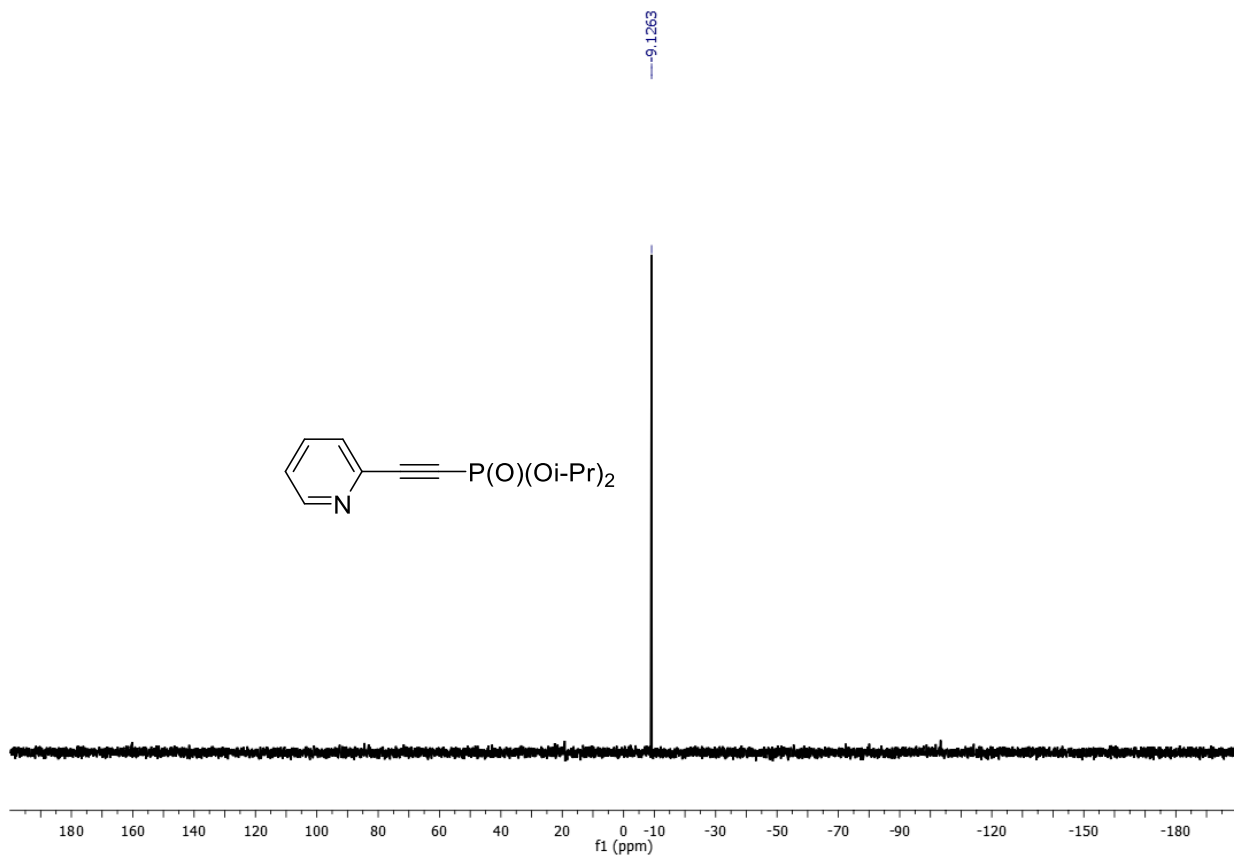

**Diisopropyl (cyclohexen-1-ylethynyl)phosphonate (4o):**

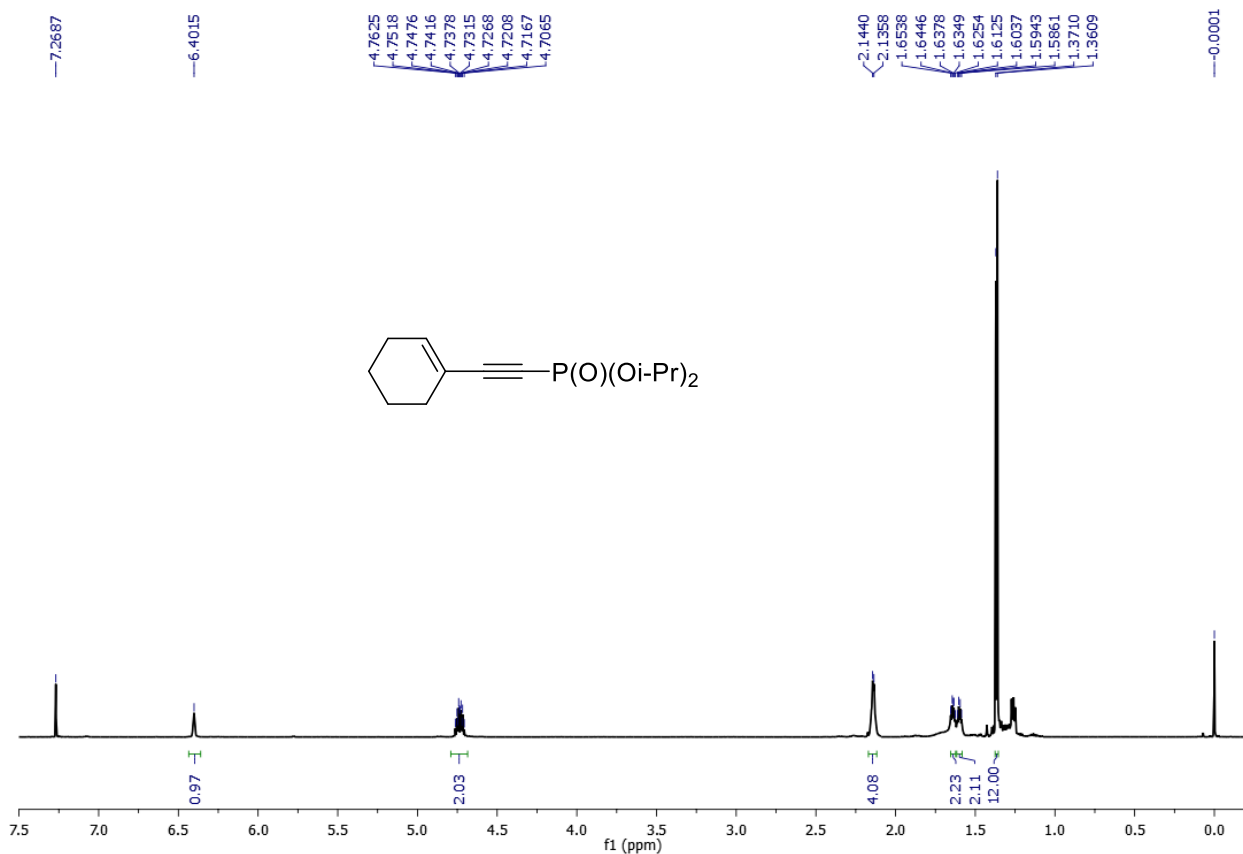

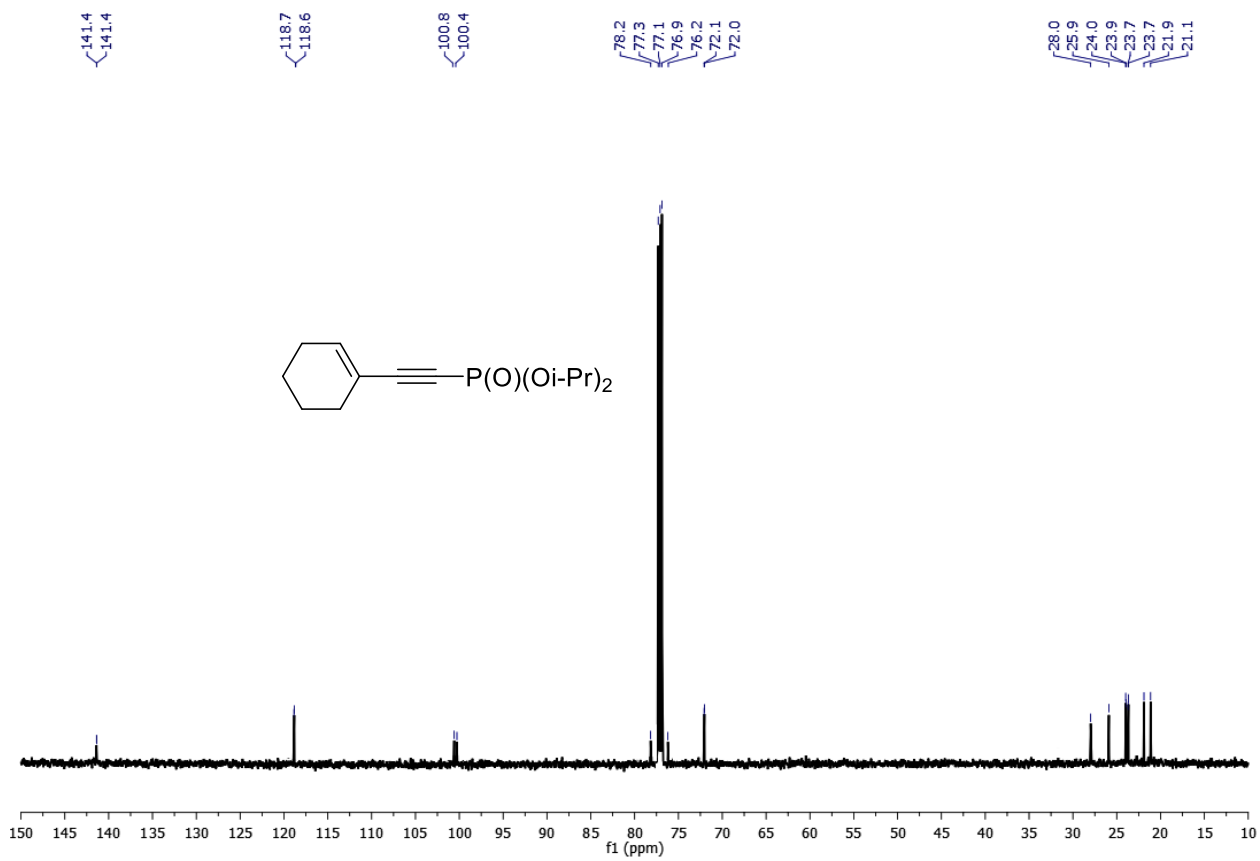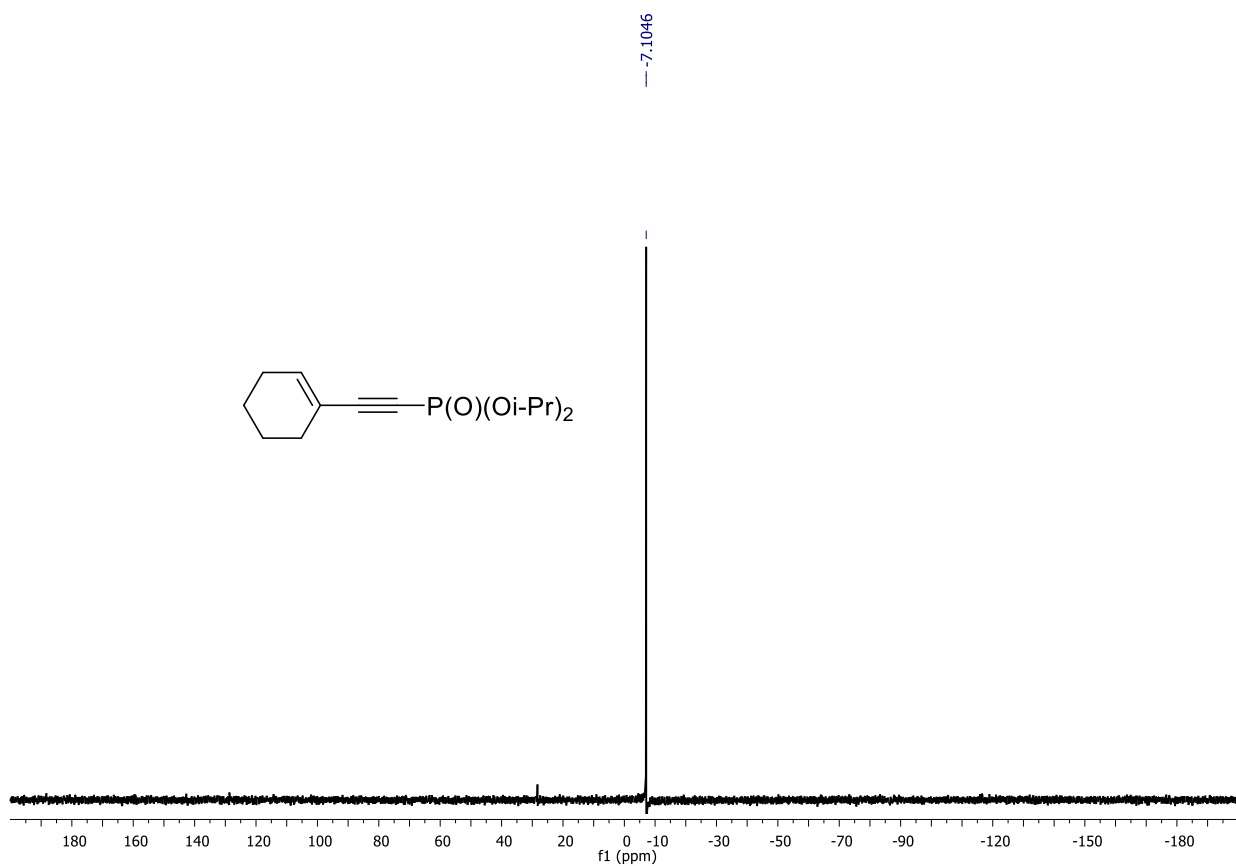

**3-(diisopropylphosphoryl)prop-2-yn-1-yl benzoate (4p):**

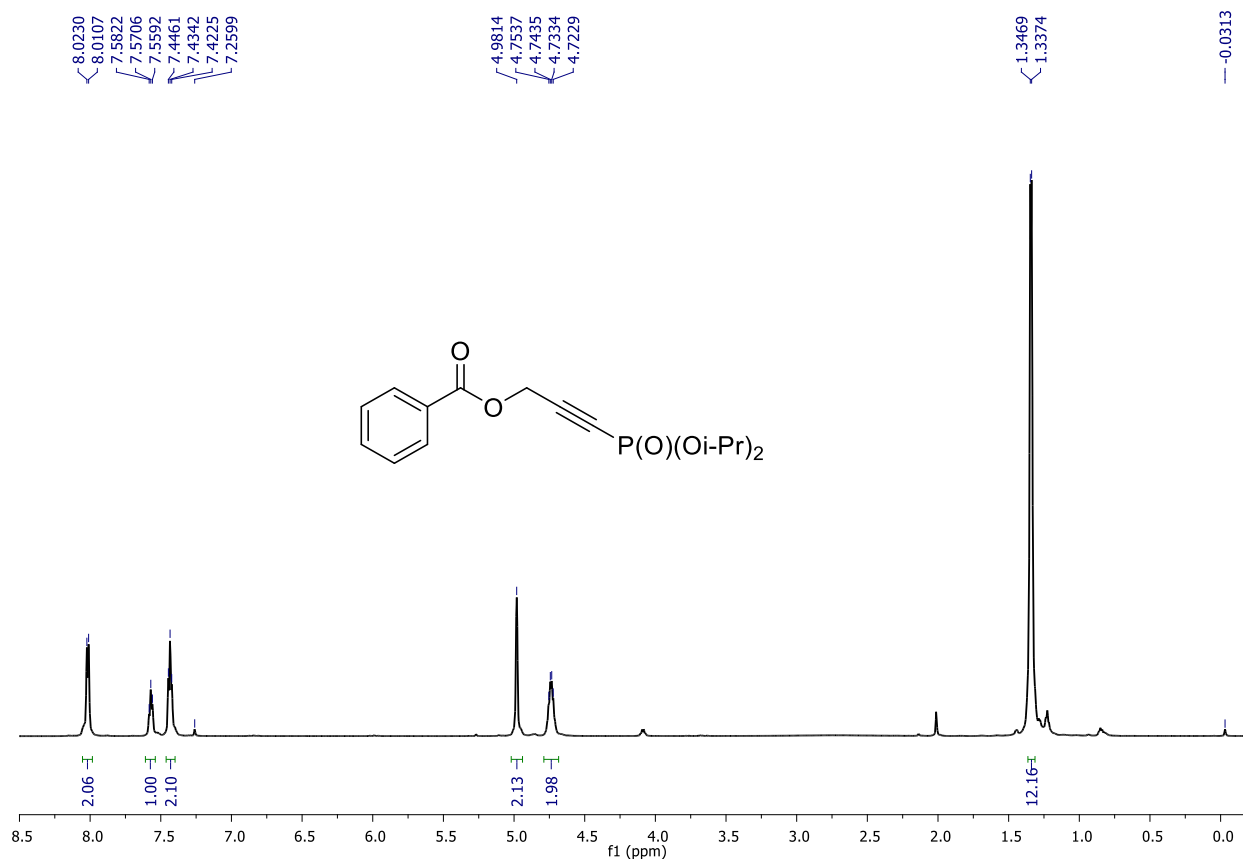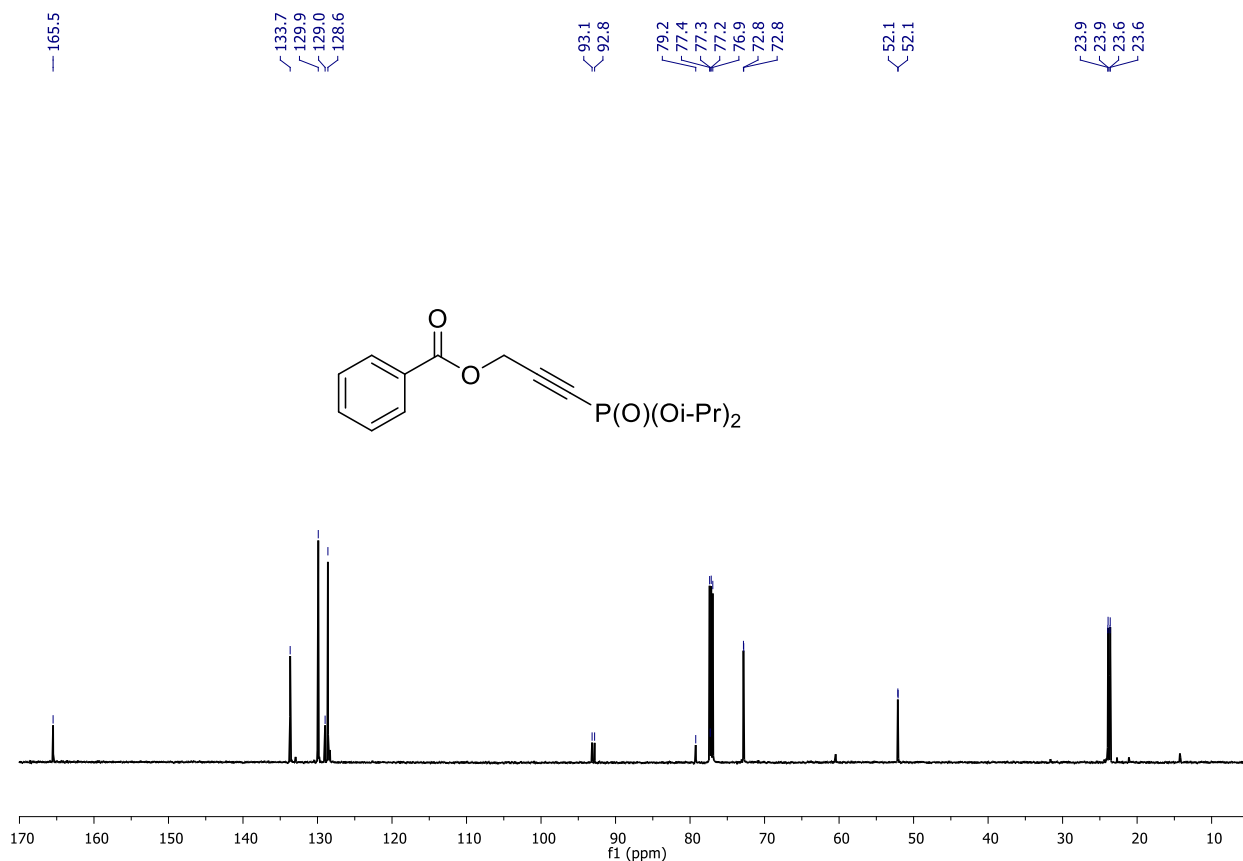

### 3-(dibutylphosphoryl)prop-2-yn-1-yl benzoate (4q):

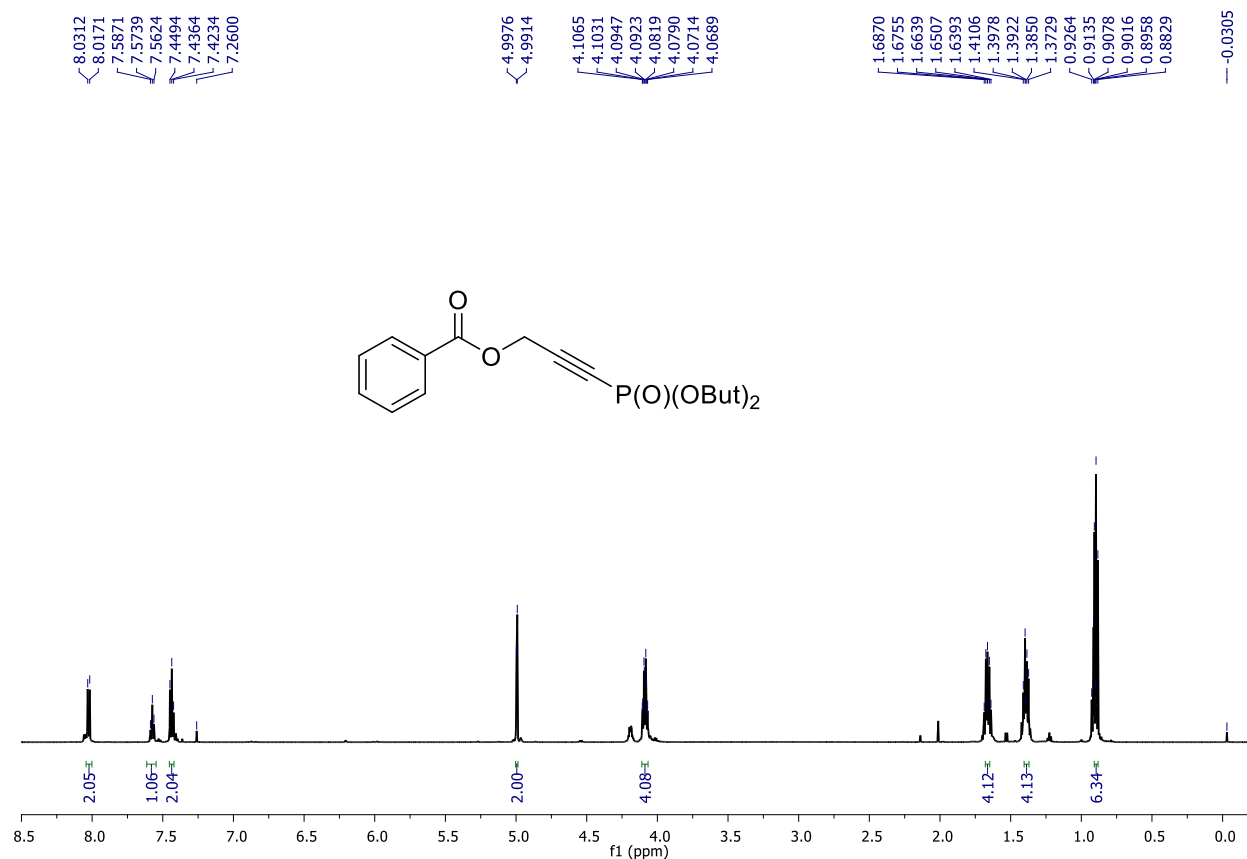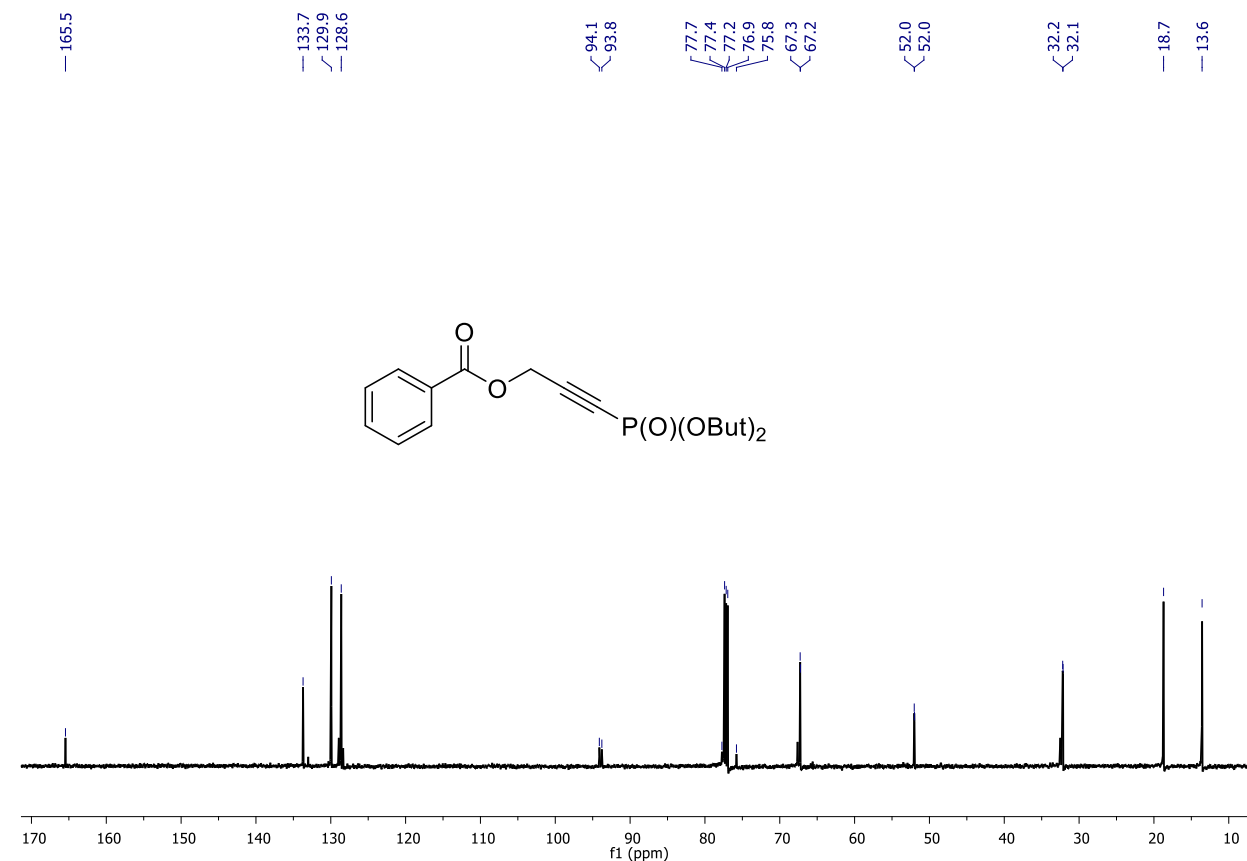

# Diisopropyl hex-1-yn-1-ylphosphonate (4r):

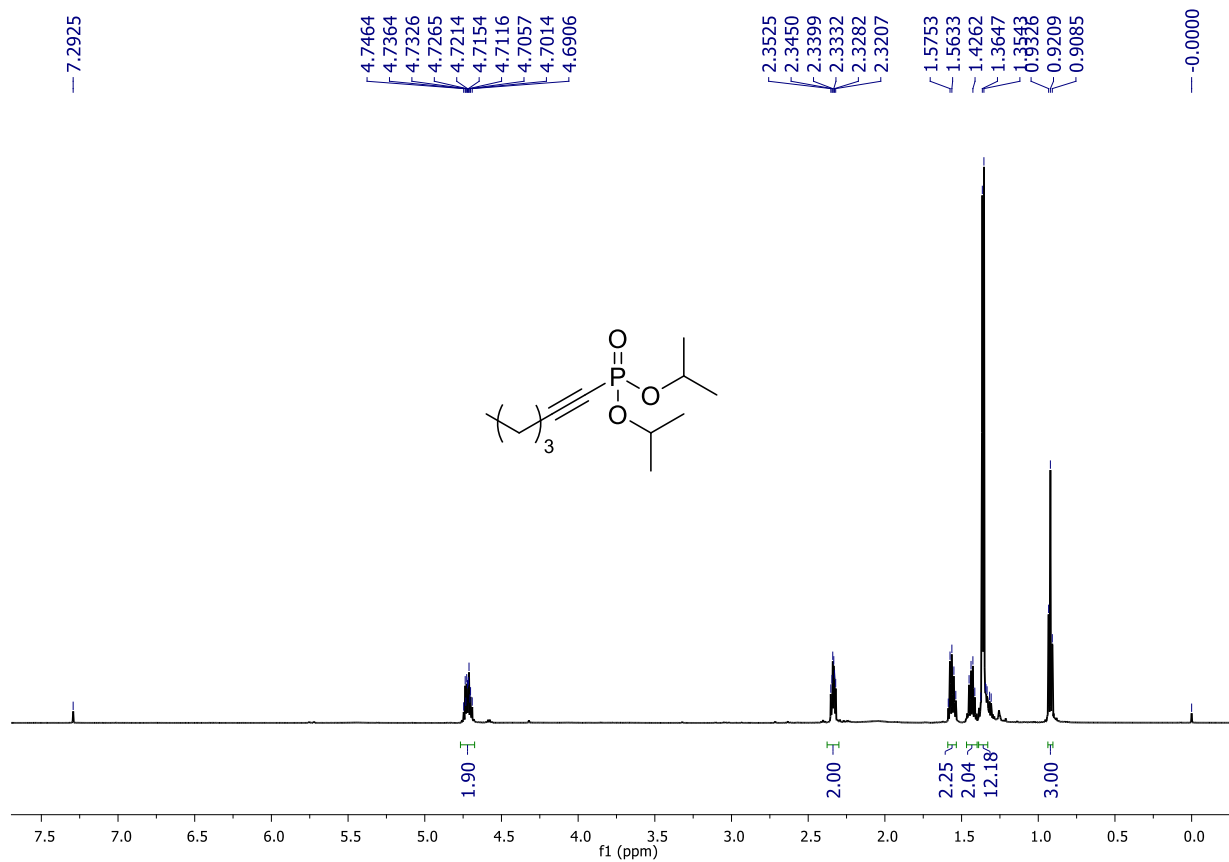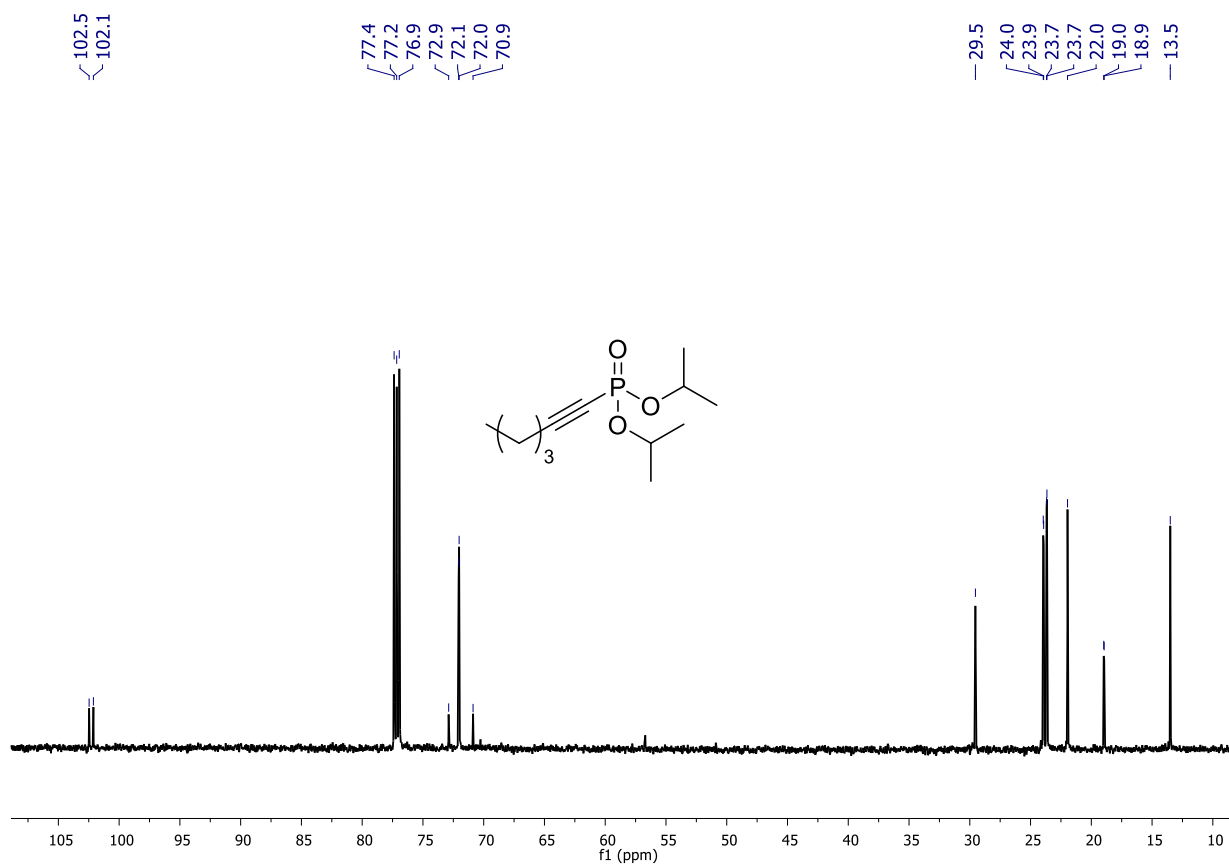



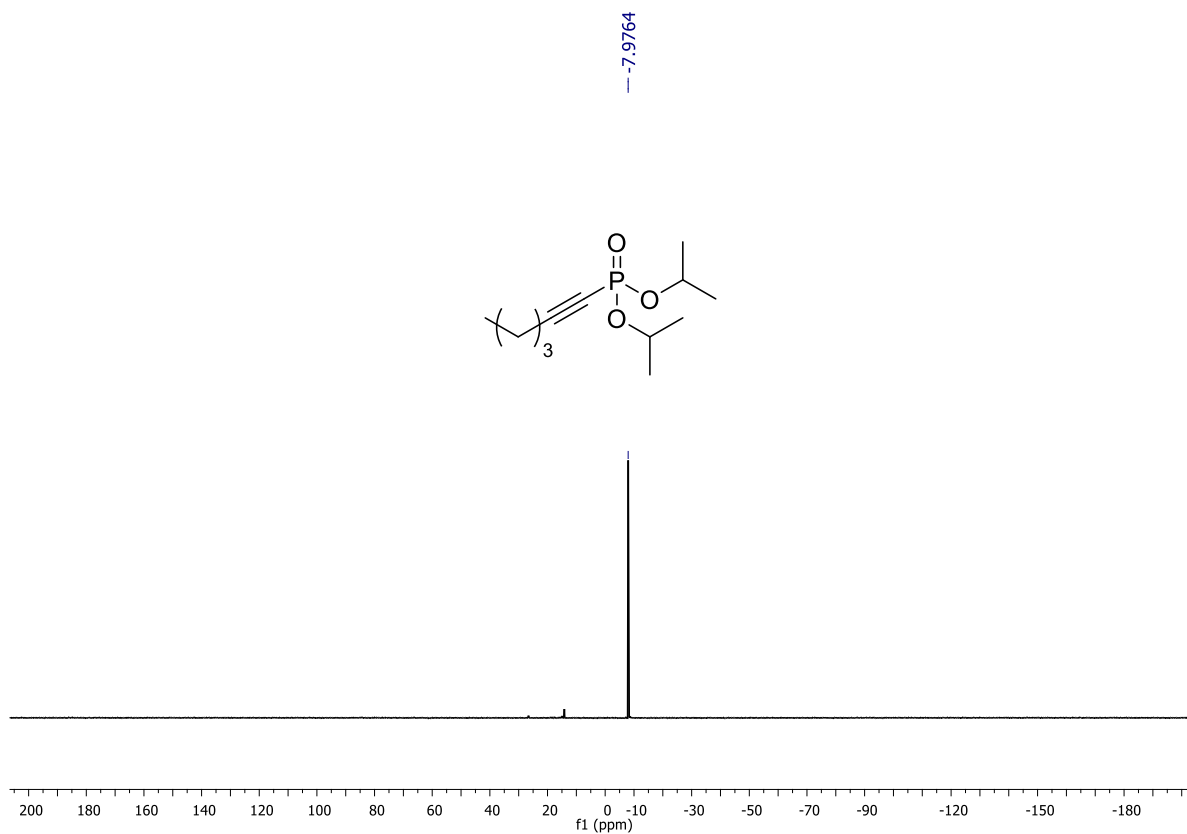

**Diisopropyl dec-1-yn-1-ylphosphonate (4s):**

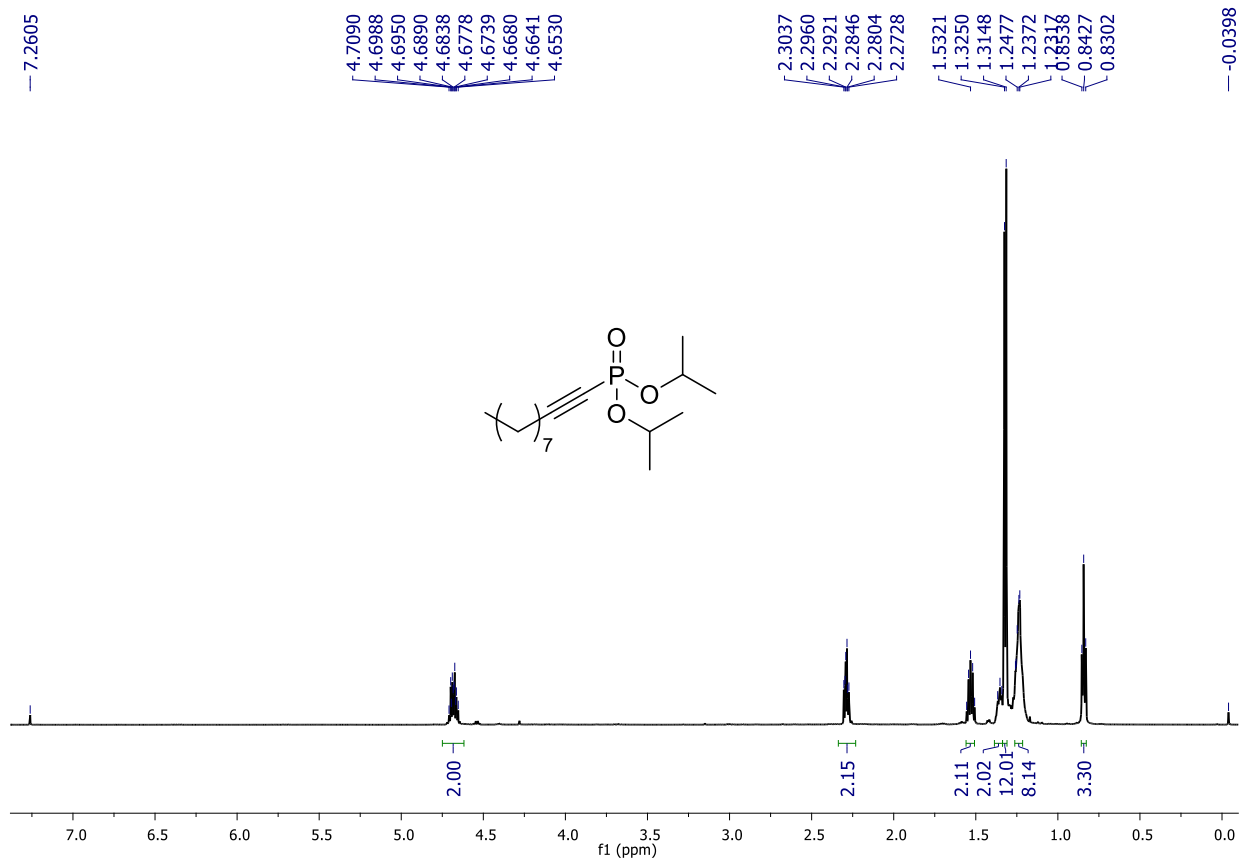

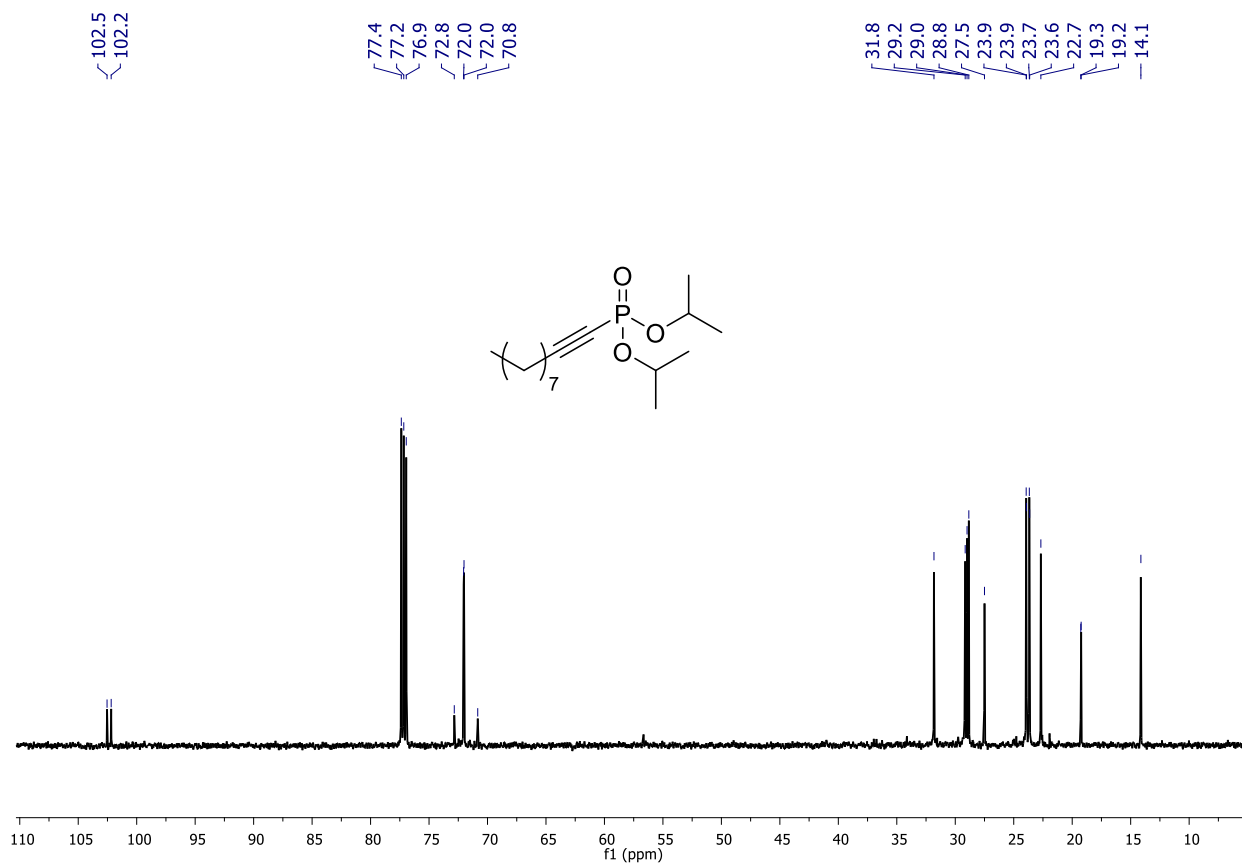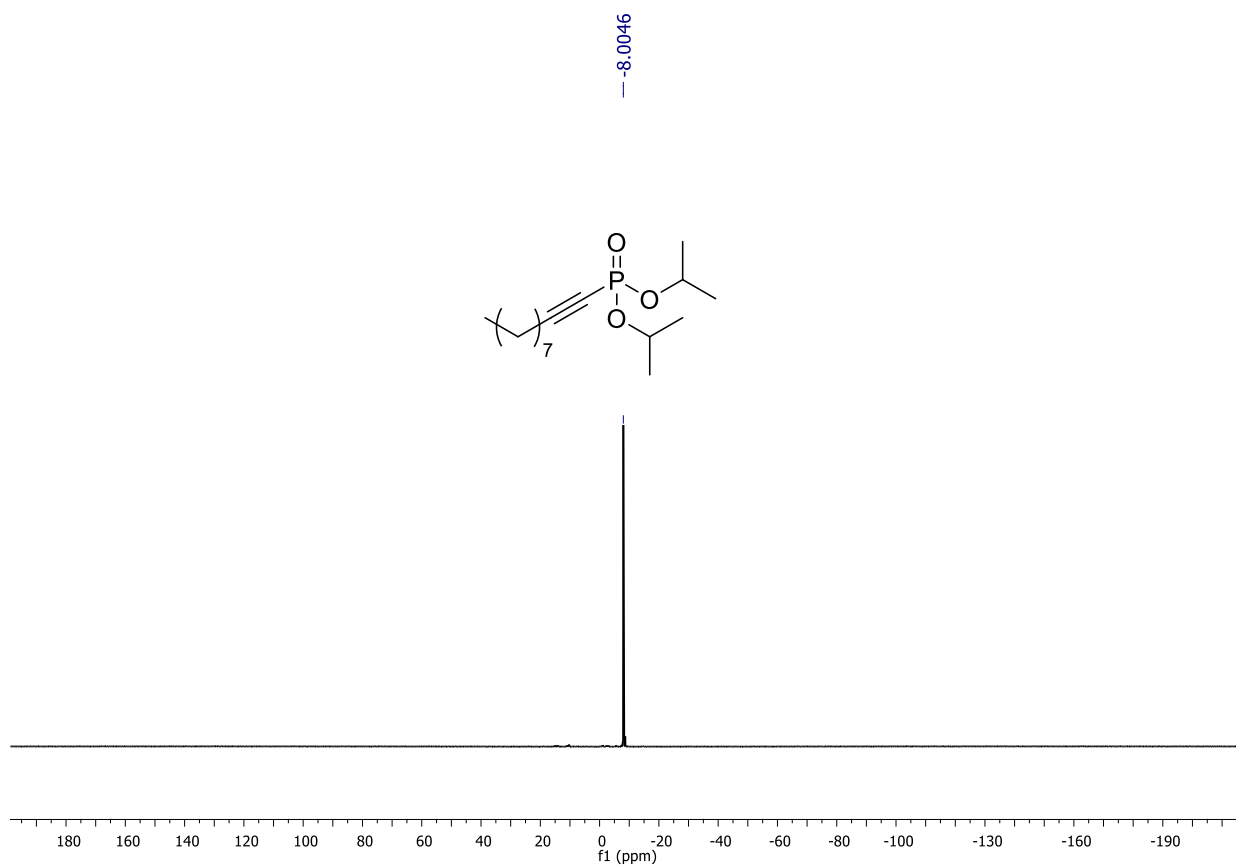

**Dibutyl (phenylethynyl)phosphonate (4t):**

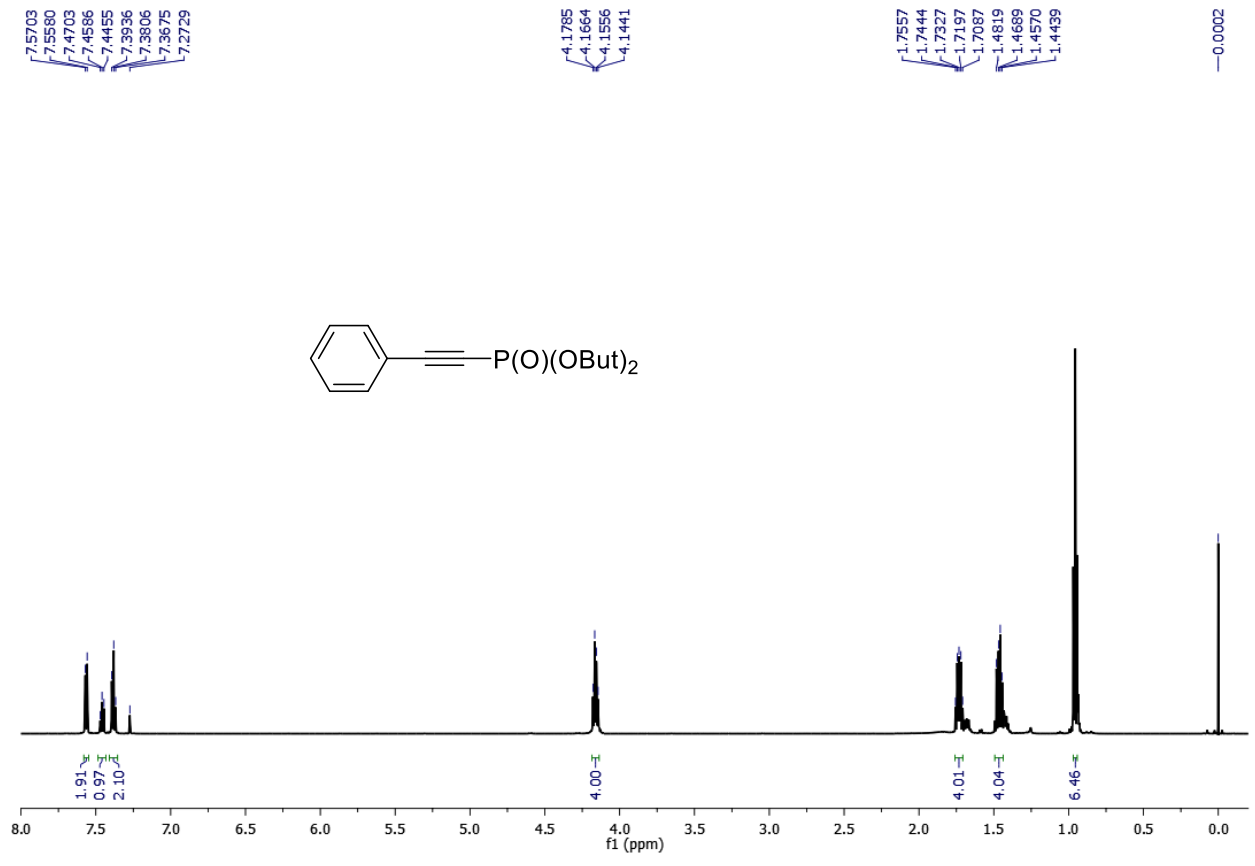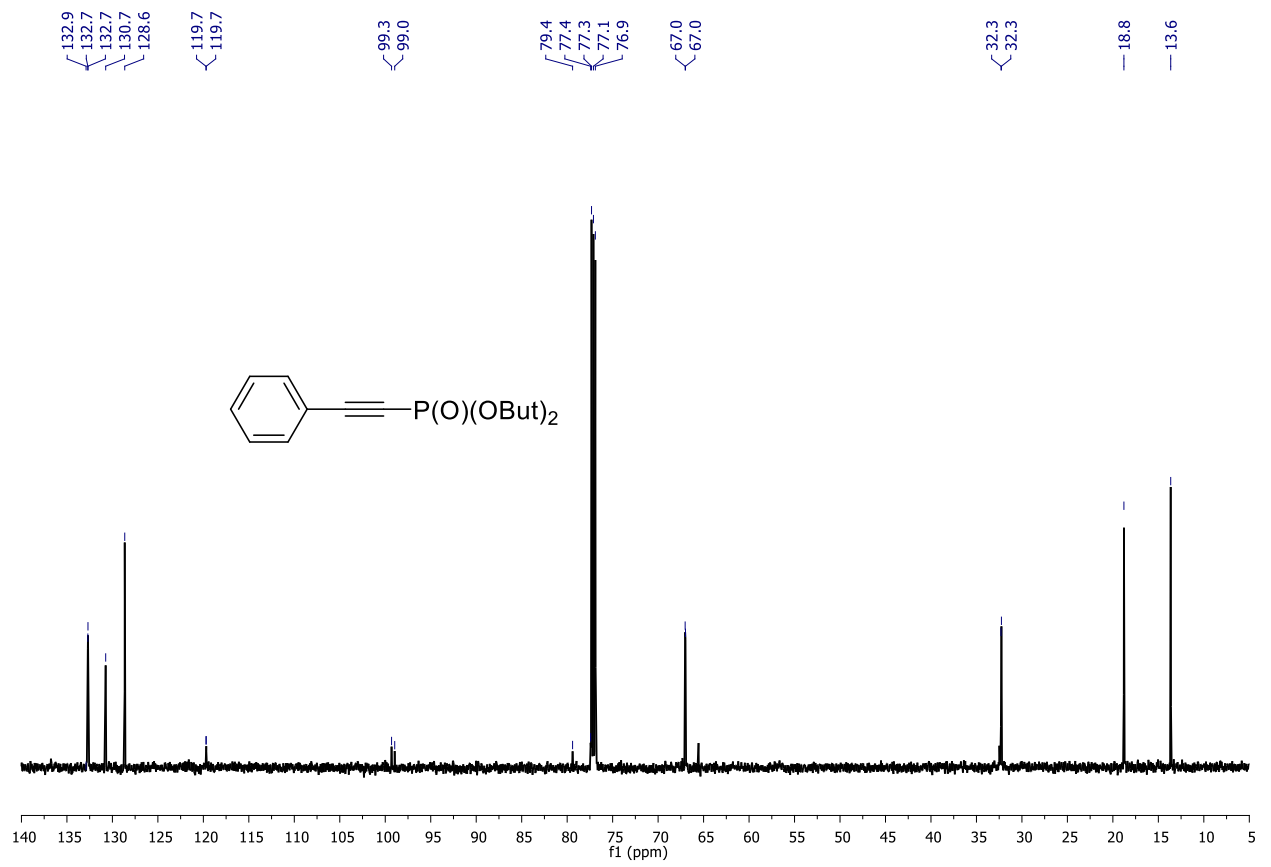

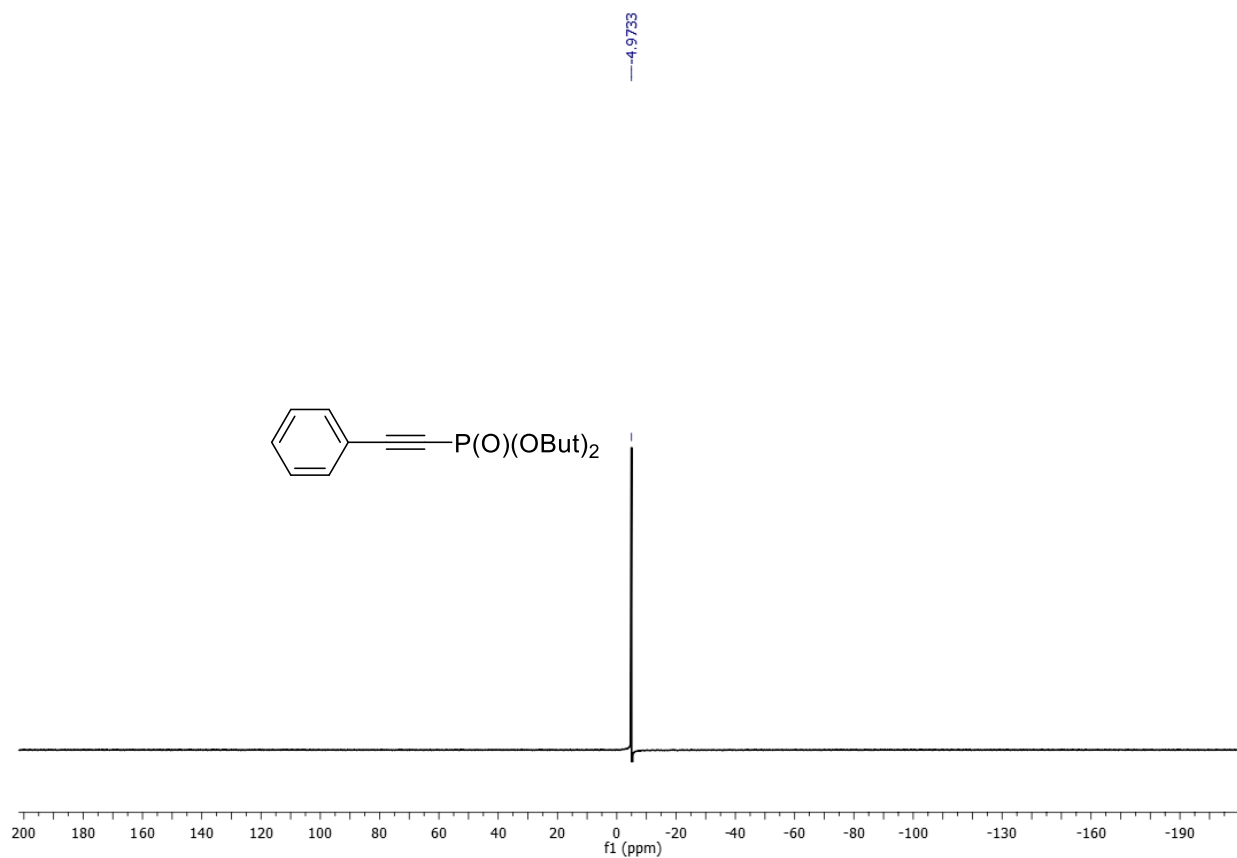

**<sup>1</sup>H & <sup>13</sup>C Spectra:**

**3-(phenylethynyl)oxazolidin-2-one (5a):**

7.4494  
7.4461  
7.4429  
7.4416  
7.4388  
7.4356  
7.4301  
7.3135  
7.3098  
7.3052  
7.3031  
7.3007  
7.2967  
7.2939  
7.2654

4.4911  
4.4768  
4.4755  
4.4725  
4.4592  
4.0139  
4.0004  
3.9976  
3.9820

-0.0003

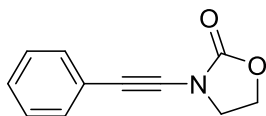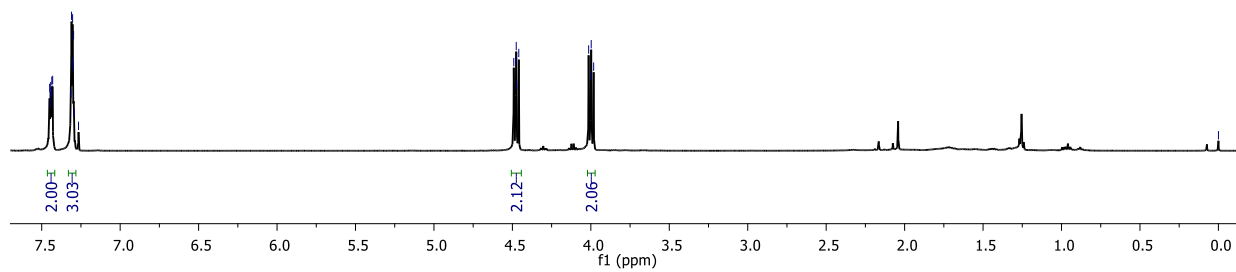

156.0

131.7

128.4

128.3

122.3

79.1

77.4

77.2

76.9

71.3

63.2

47.1

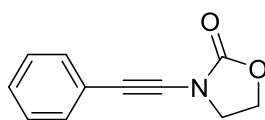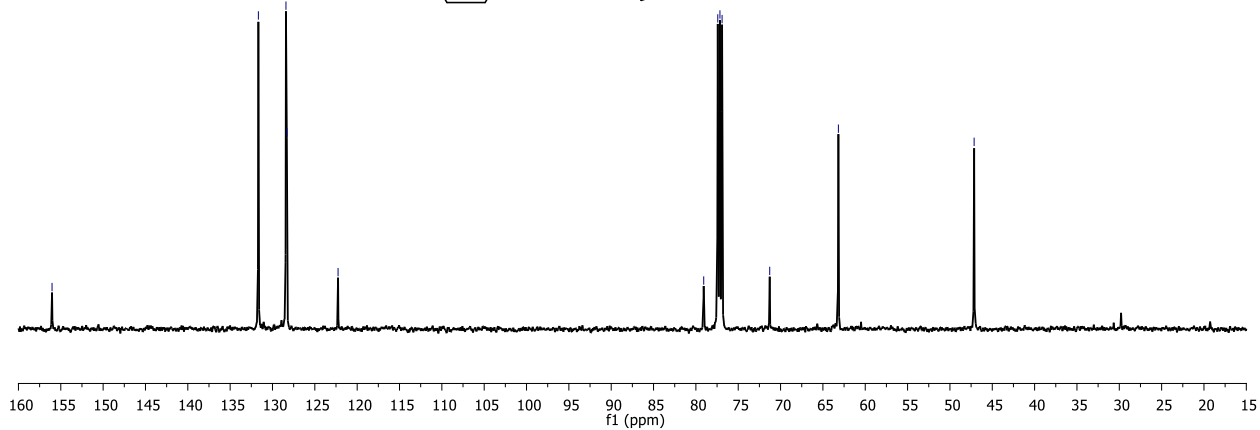

**3-(p-tolylethynyl)oxazolidin-2-one (5b):**

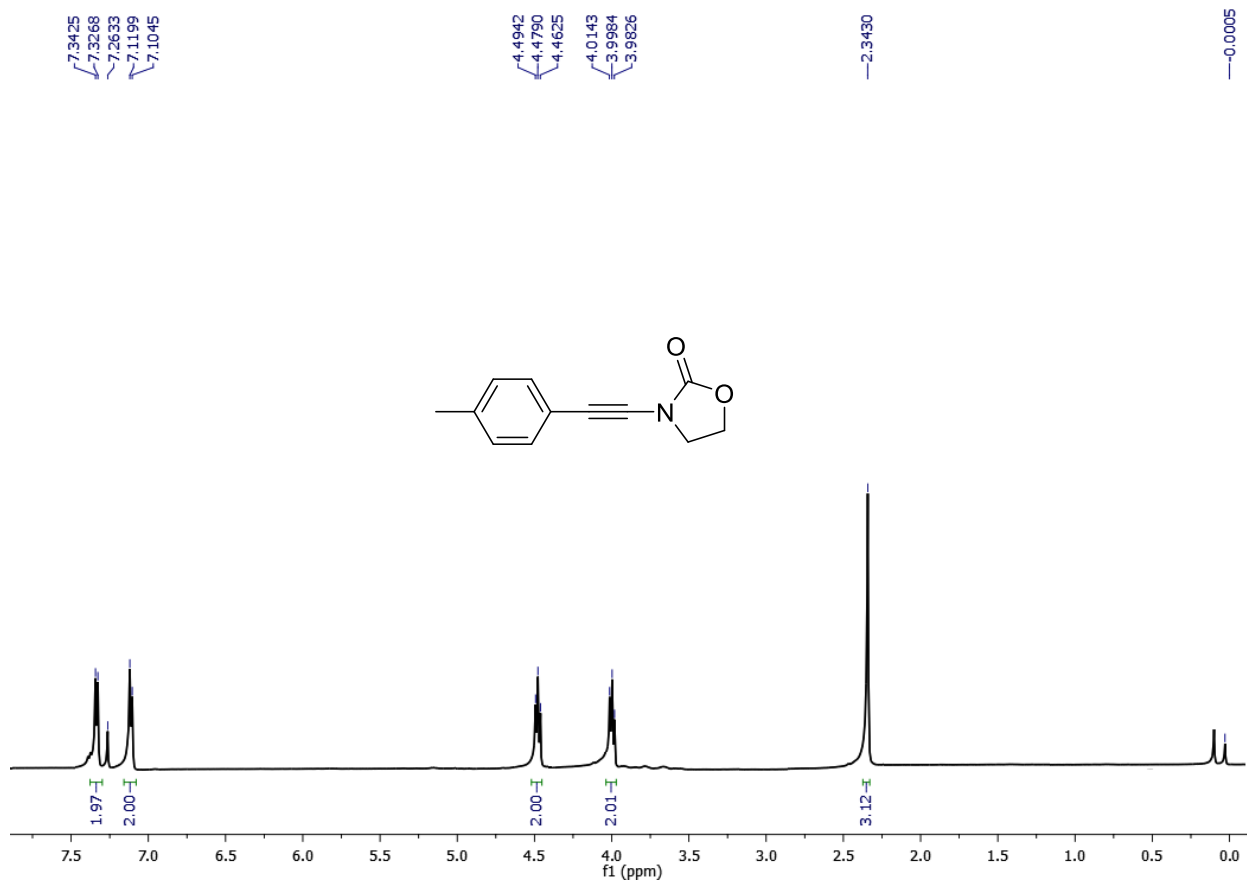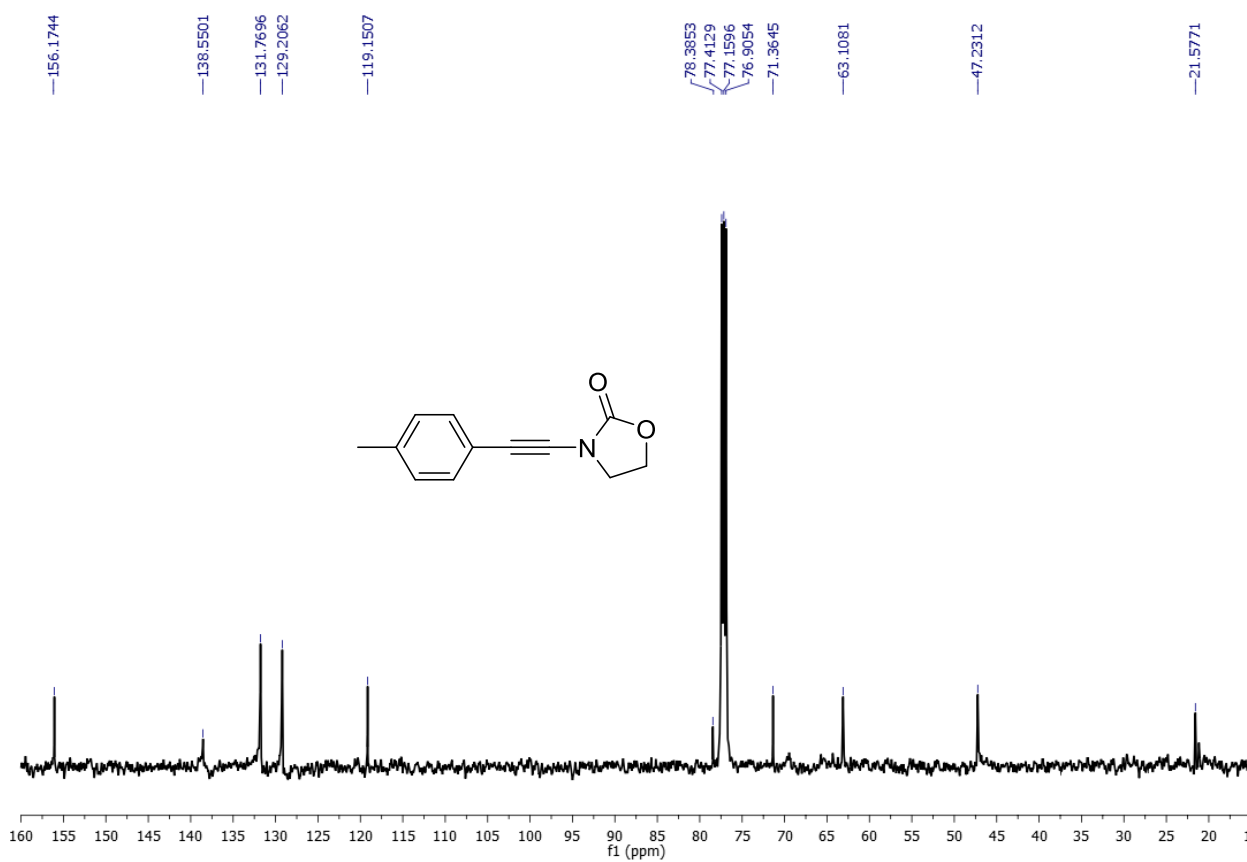

**3-(4-methoxyphenylethynyl)oxazolidin-2-one (5c):**

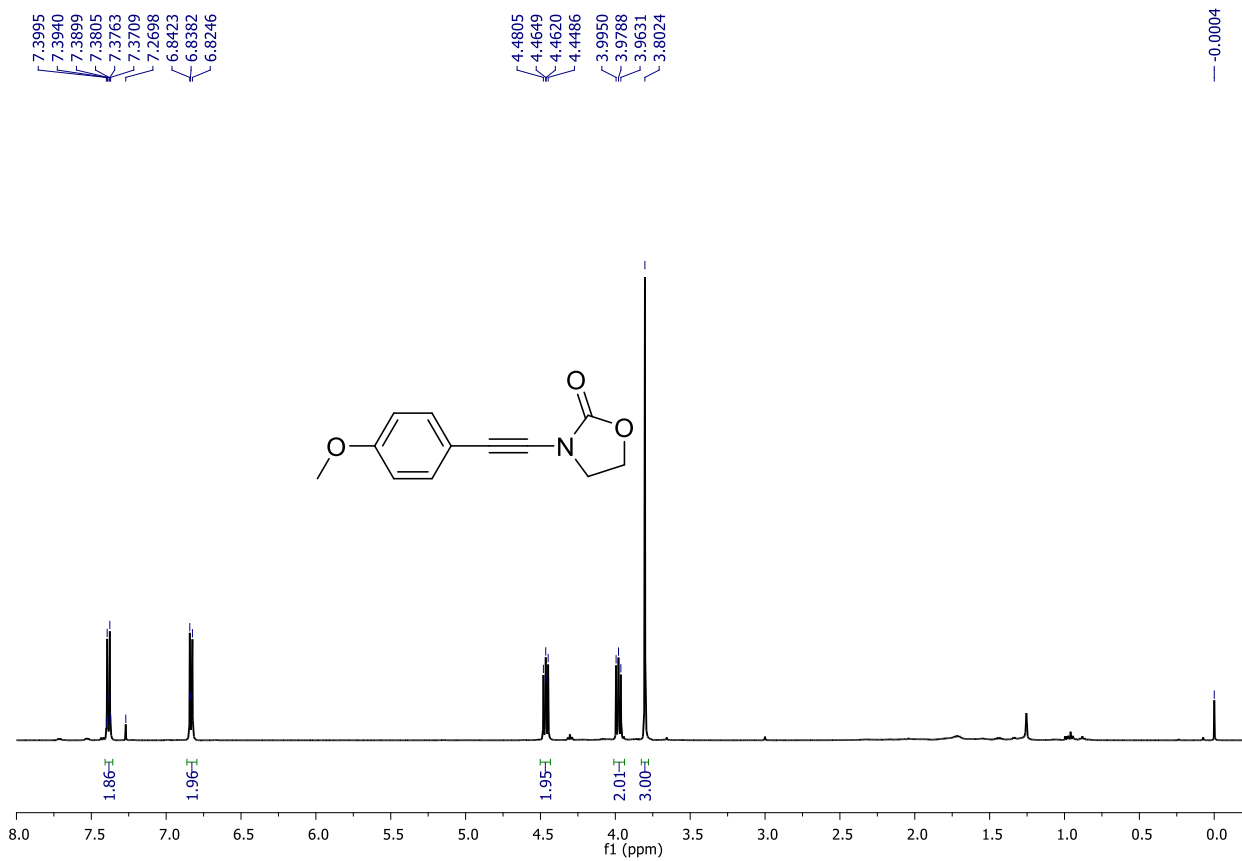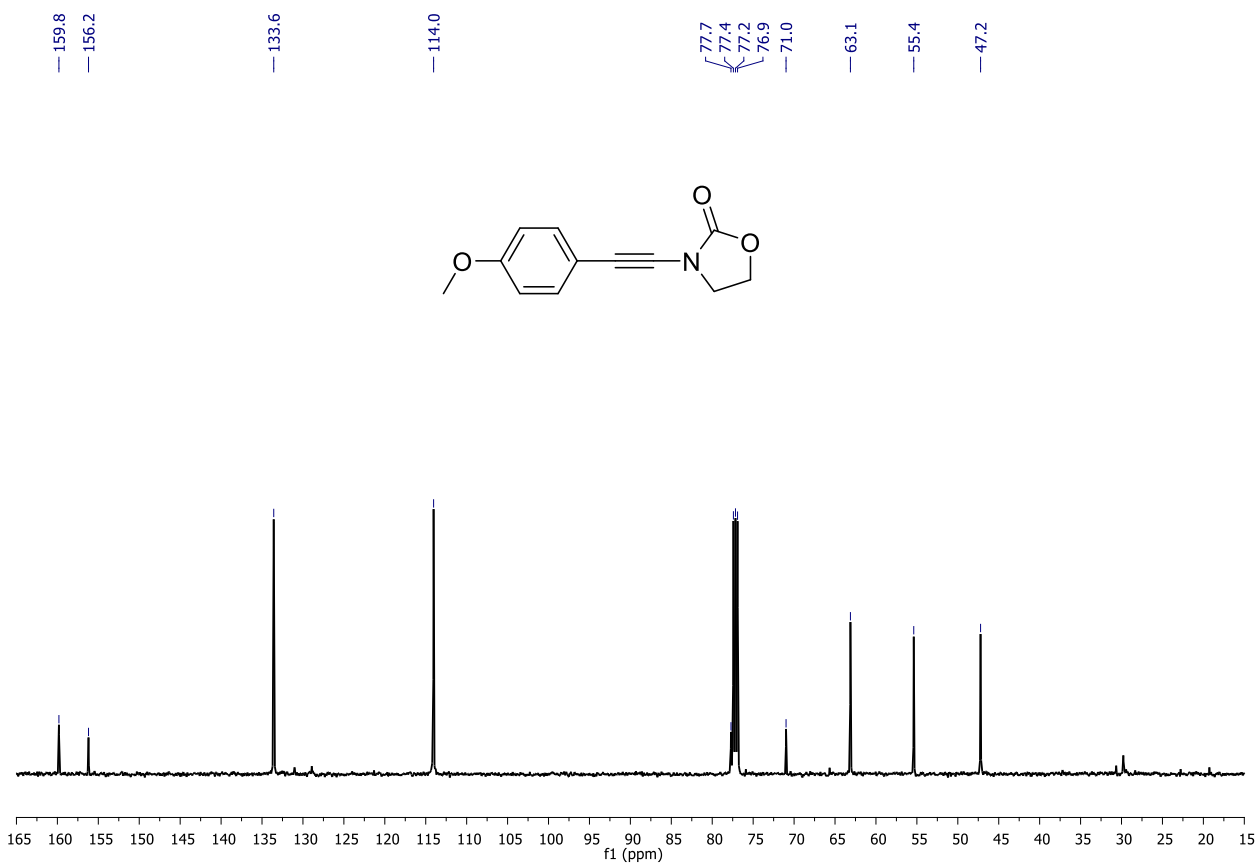

**3-(4-N,N-dimethylaminophenylethynyl)oxazolidin-2-one (5d):**

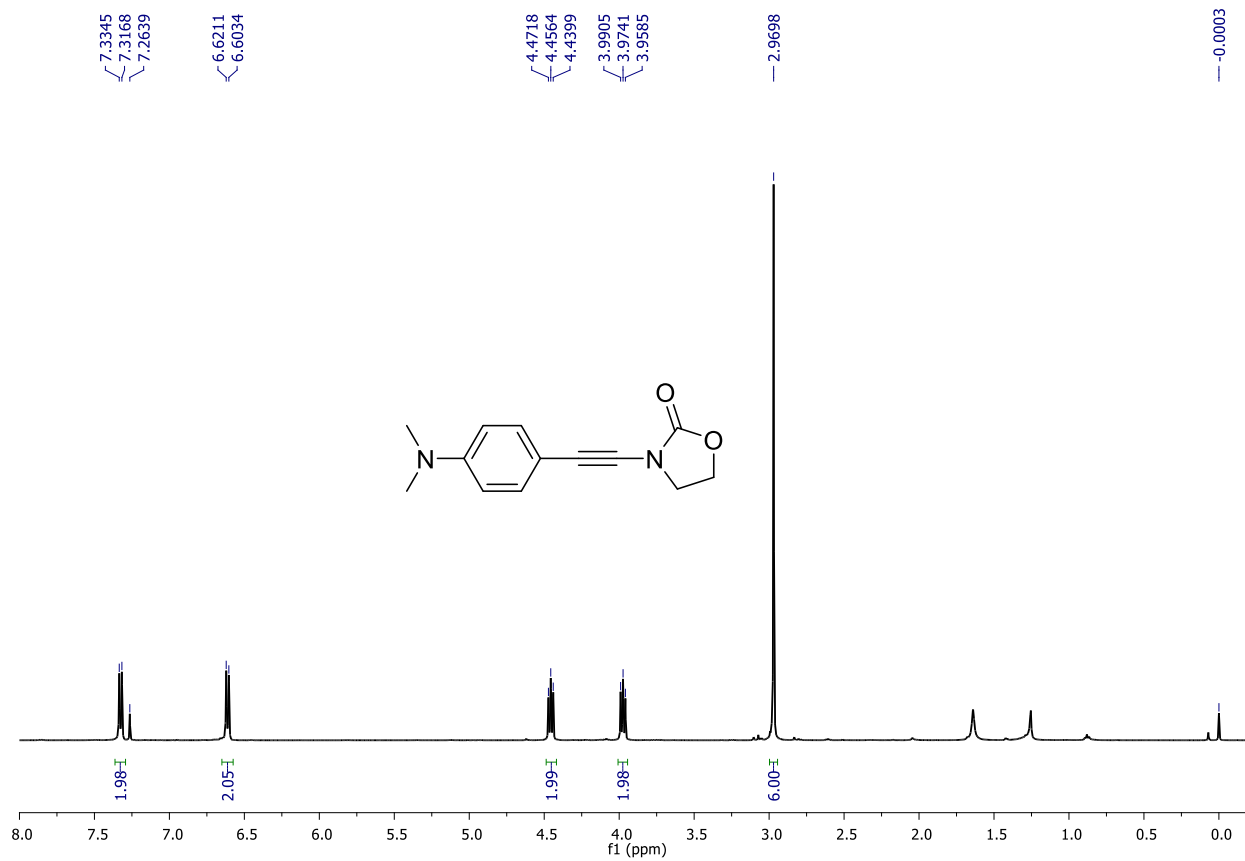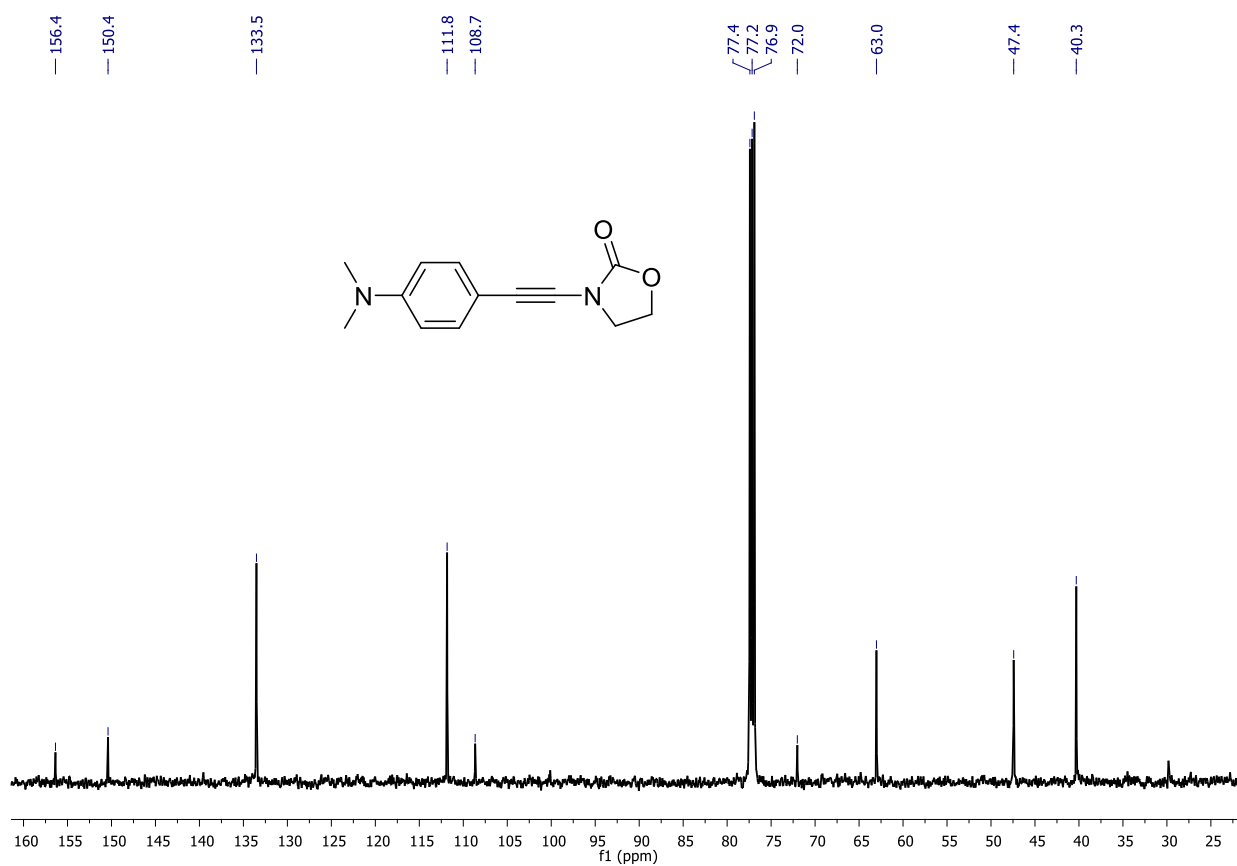

**3-(4-*tert*-butylphenylethynyl)oxazolidin-2-one (5e):**



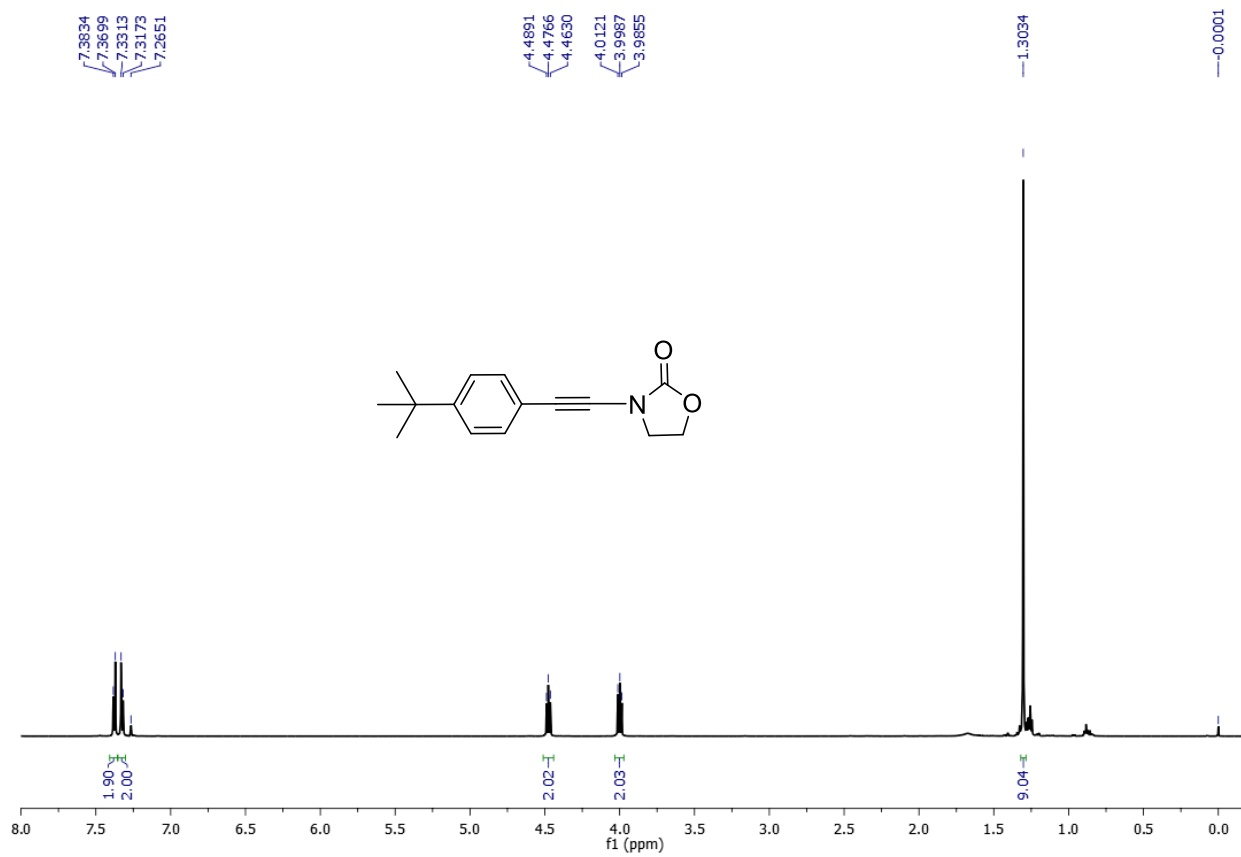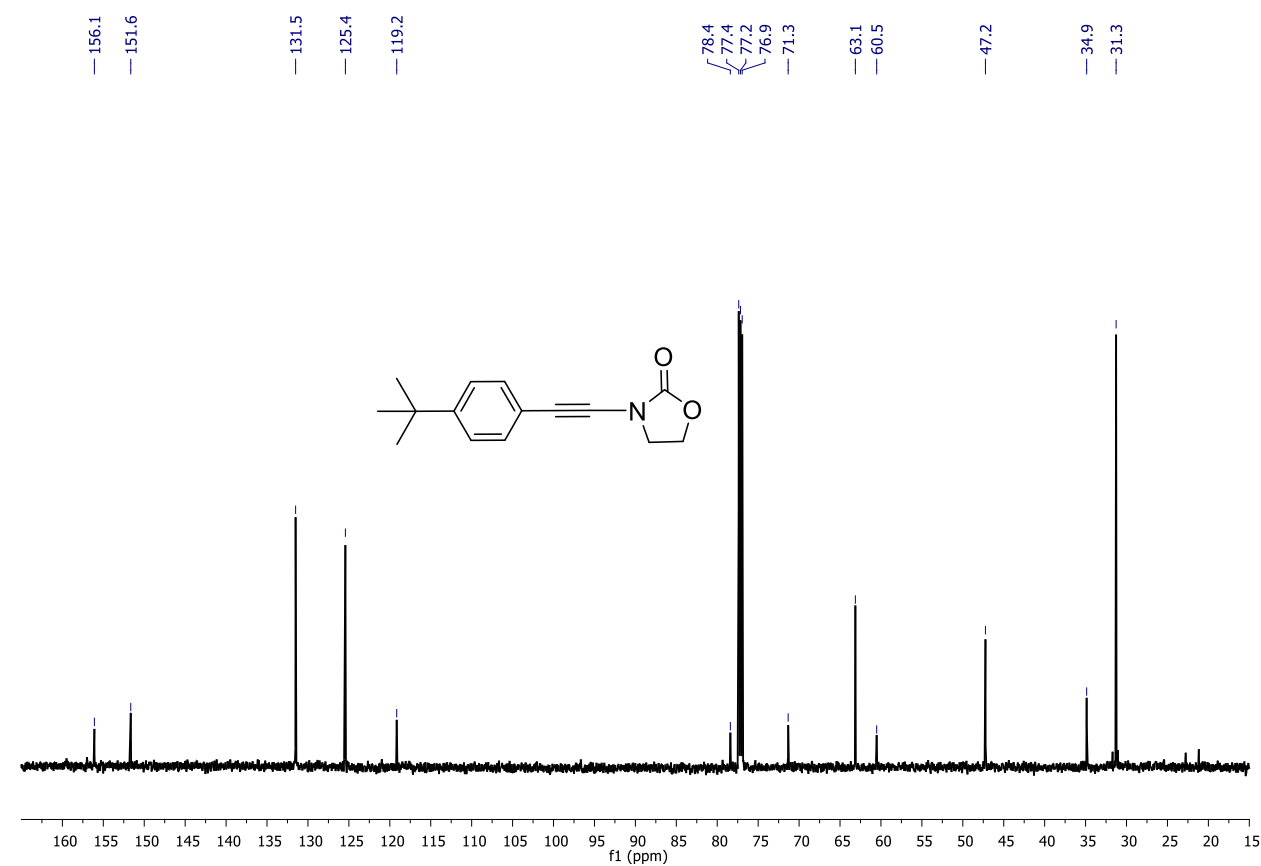

**3-(4-bromophenylethynyl)oxazolidin-2-one (5f):**

7.4574  
7.4528  
7.4490  
7.4396  
7.4356  
7.4311  
7.3124  
7.3079  
7.3039  
7.2945  
7.2906  
7.2861  
7.2703

4.5170  
4.5031  
4.5014  
4.4984  
4.4851  
4.0292  
4.0159  
4.0130  
4.0112  
3.9973

— 0.0047

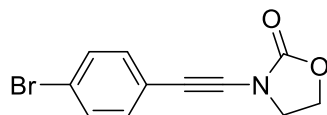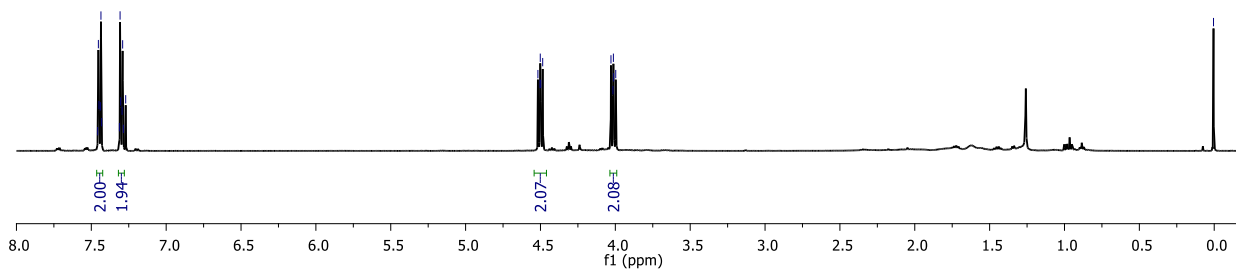

— 155.9

— 133.1  
— 131.7

— 122.5  
— 121.3

— 80.1  
— 77.4  
— 77.2  
— 76.9

— 70.5

— 63.2

— 47.1

— 29.8

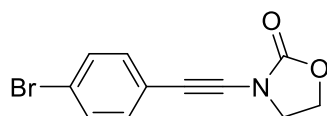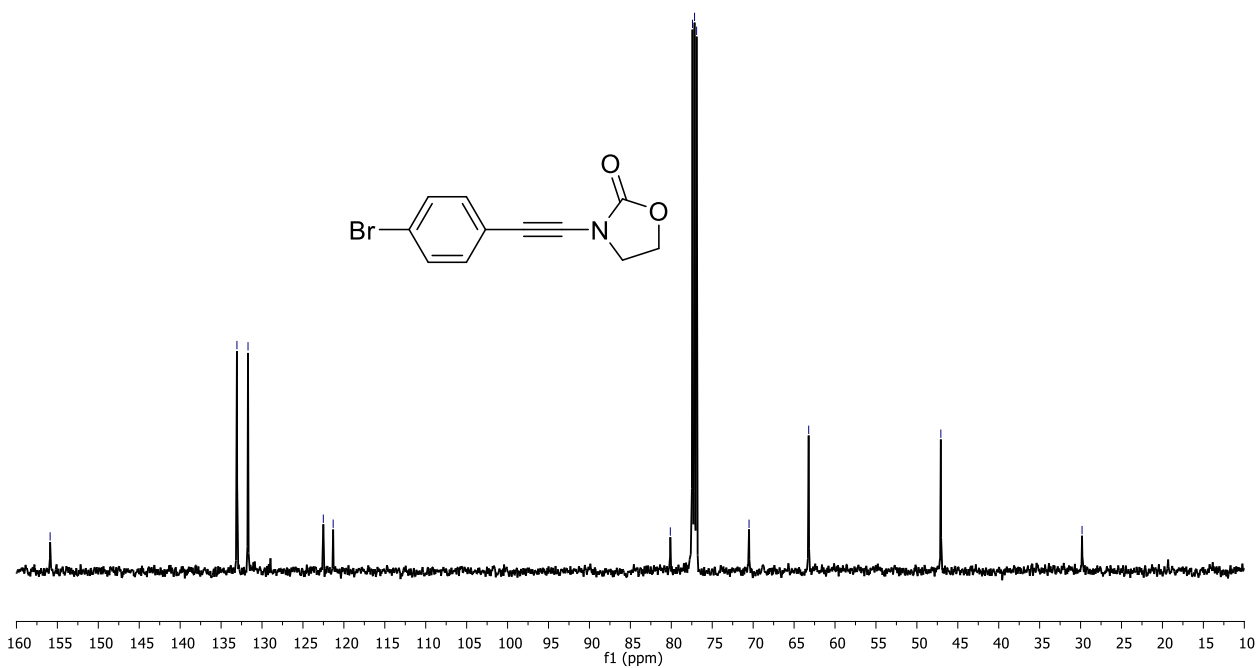

**3-(4-fluorophenylethynyl)oxazolidin-2-one (5g):**

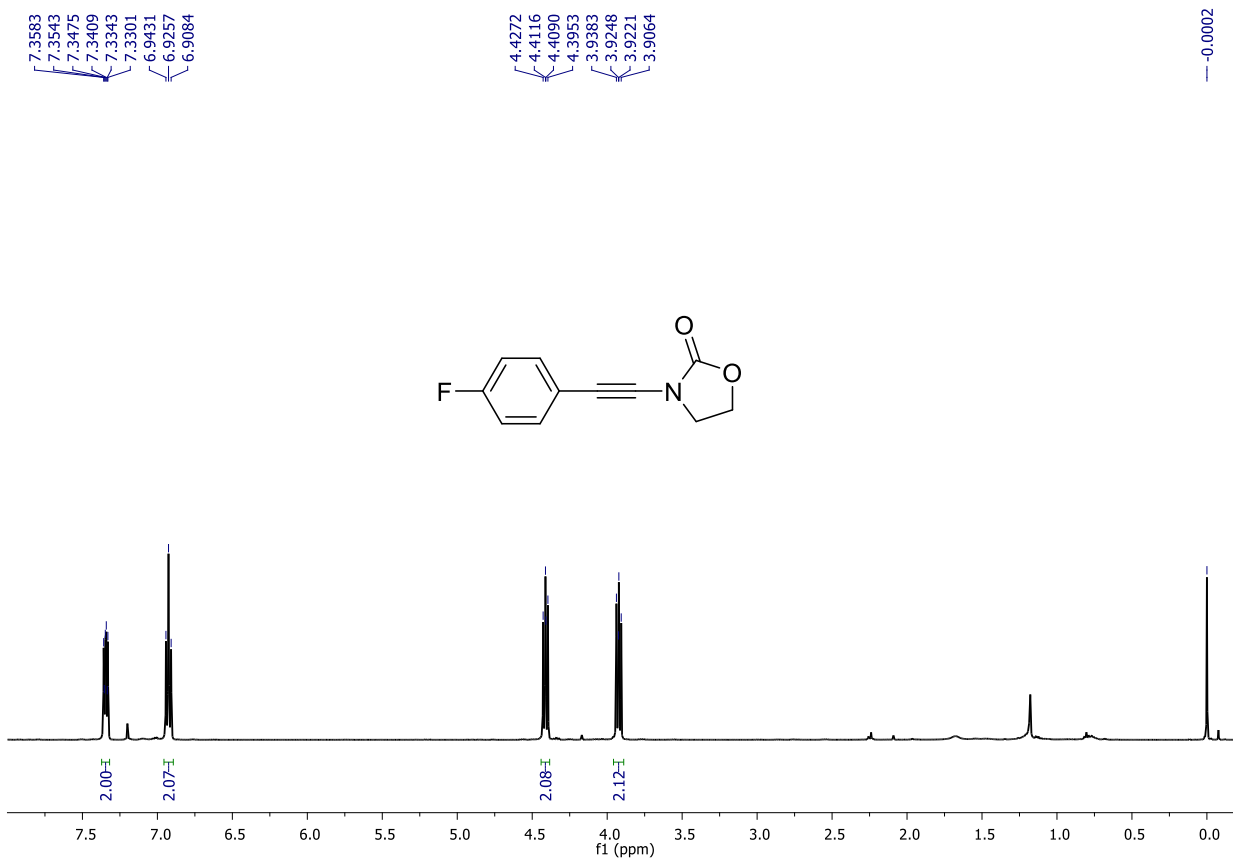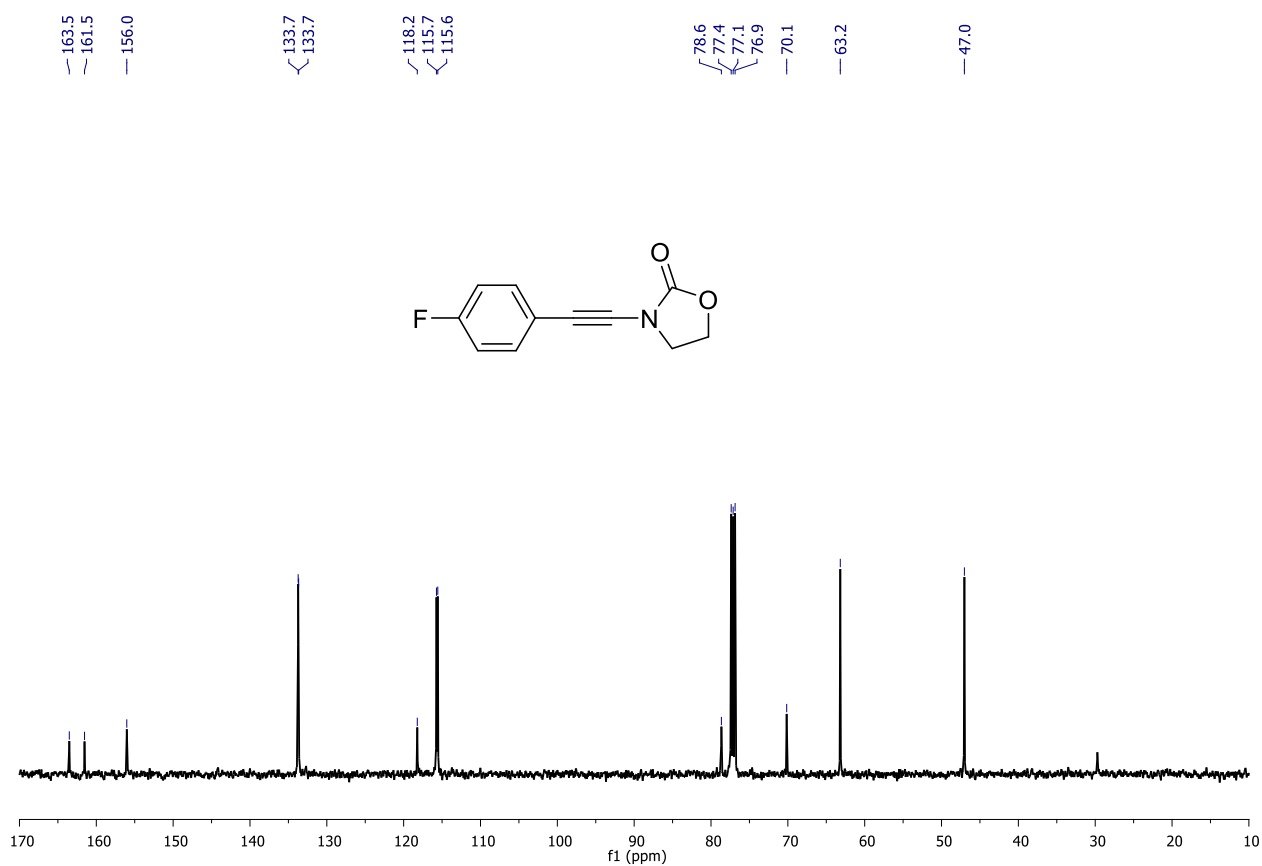

**3-(4-cyanophenylethynyl)oxazolidin-2-one (5h):**

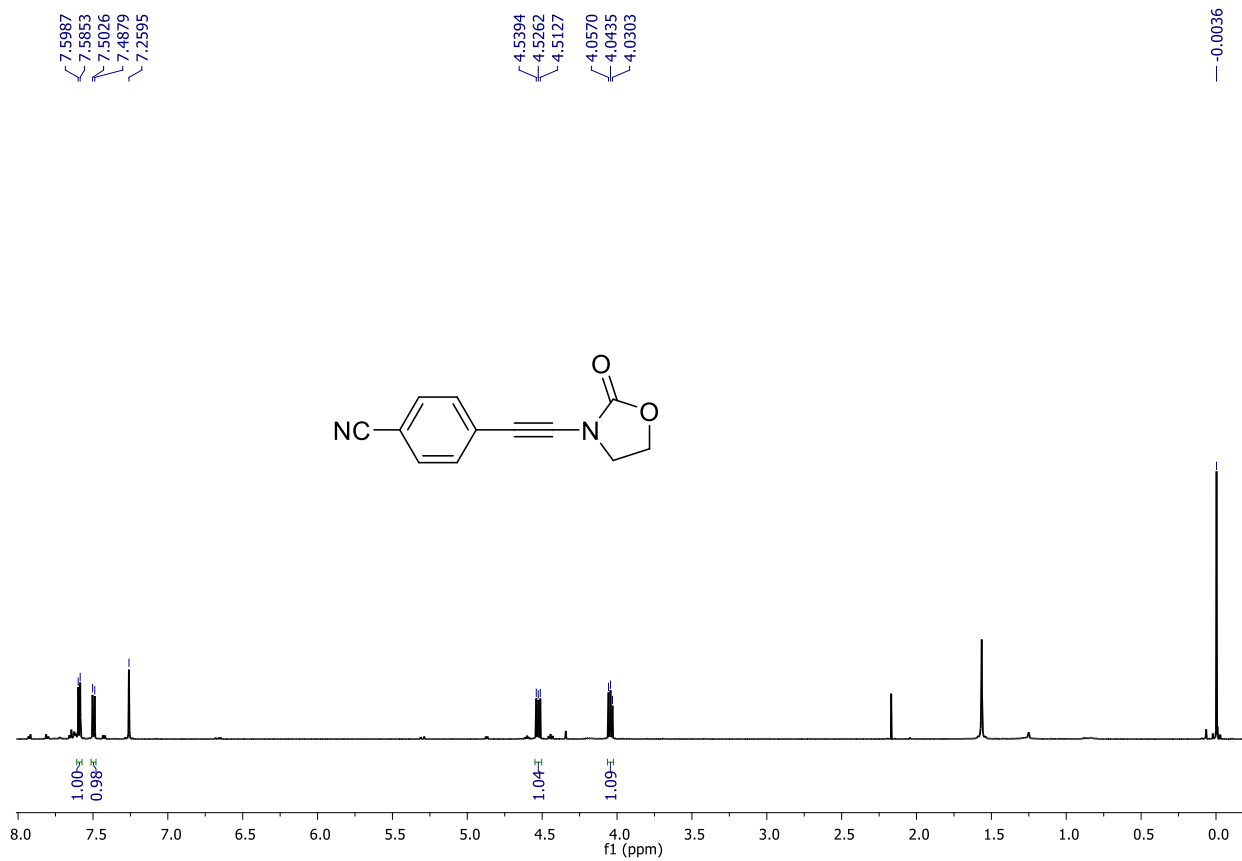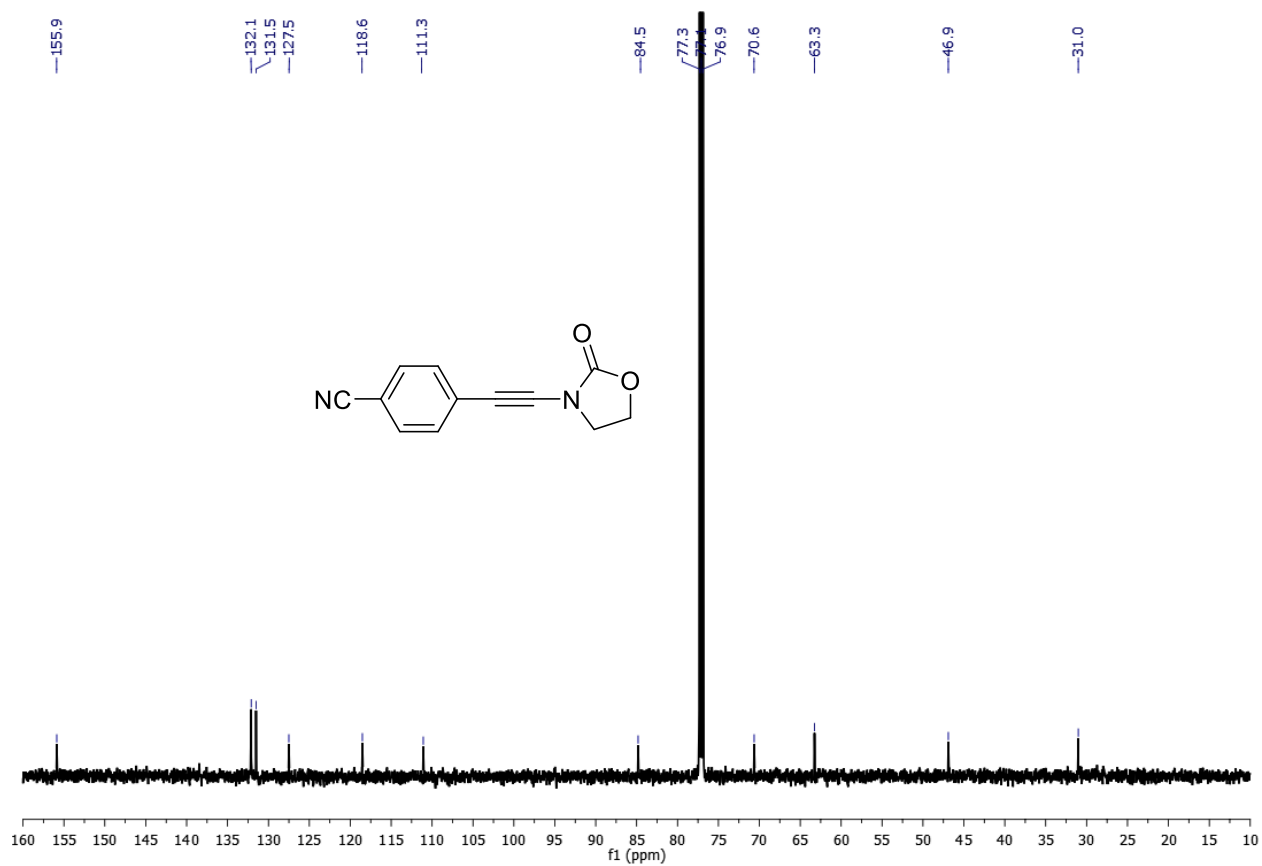

### 4-(chloromethyl)-3-(phenylethynyl)oxazolidin-2-one (5i):

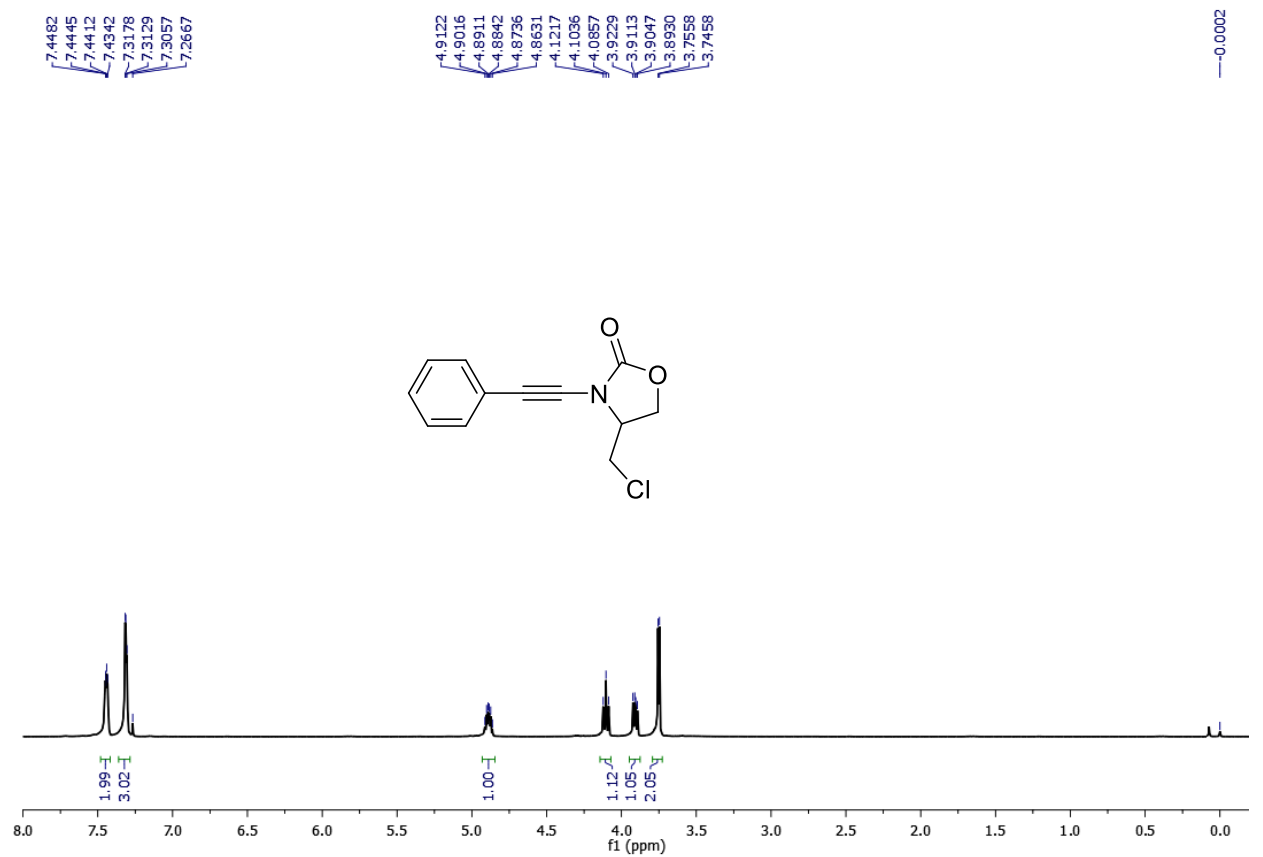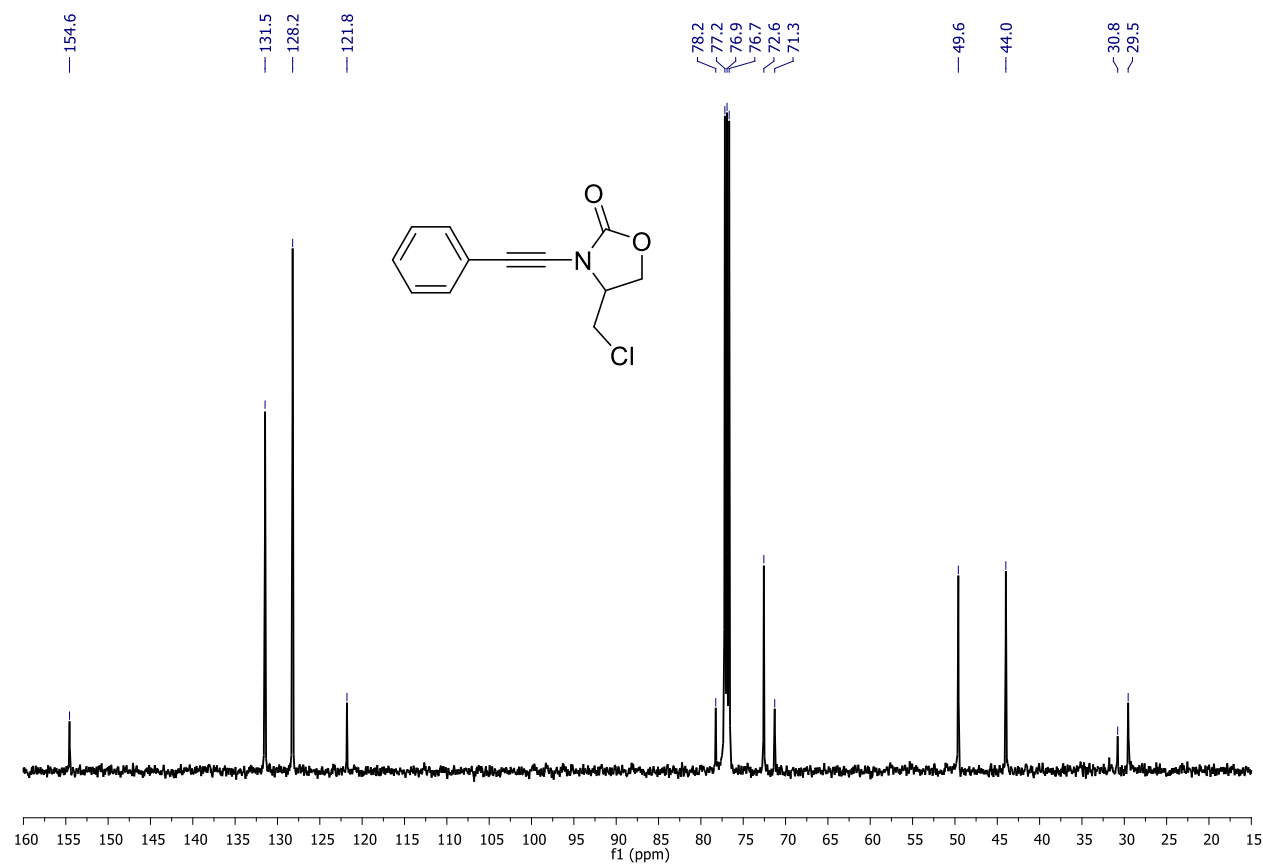

### 4-(chloromethyl)-3-(p-tolylethynyl)oxazolidin-2-one (5j):

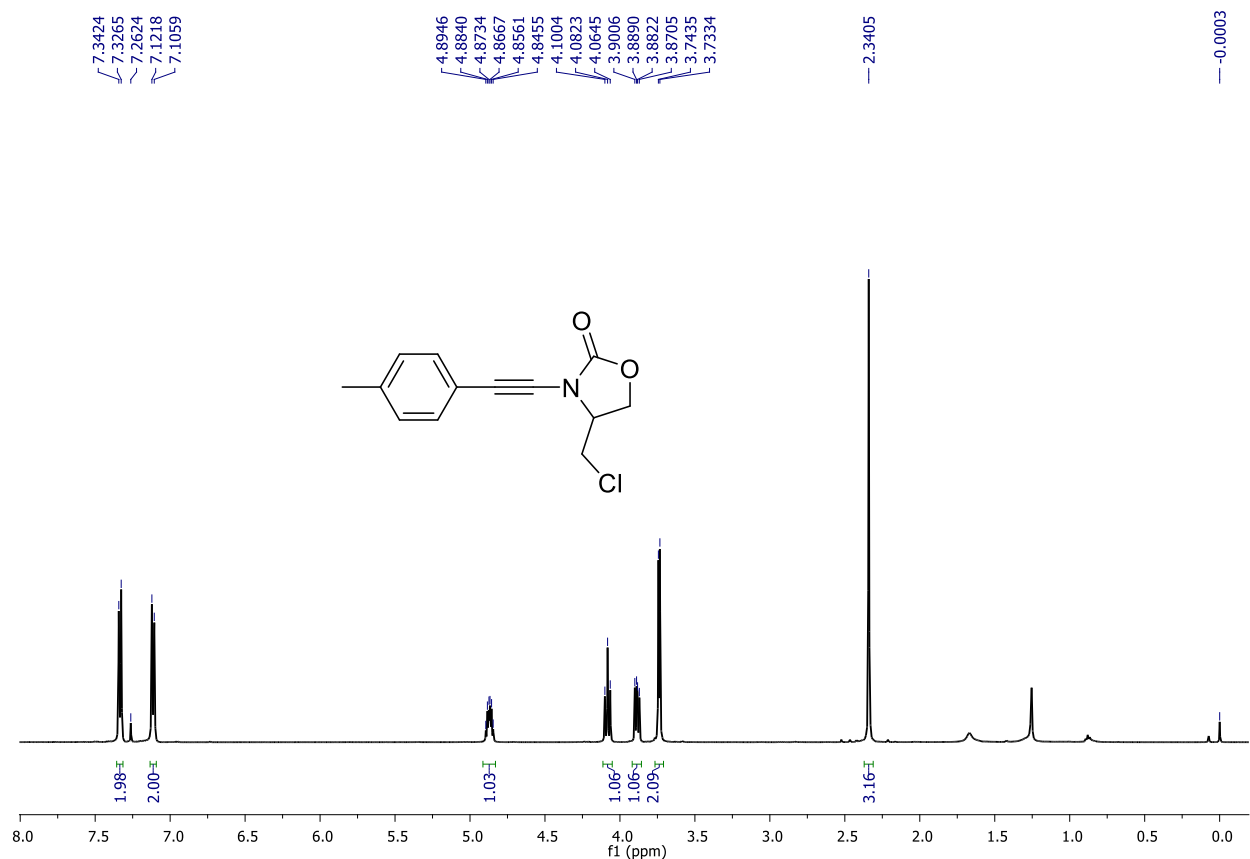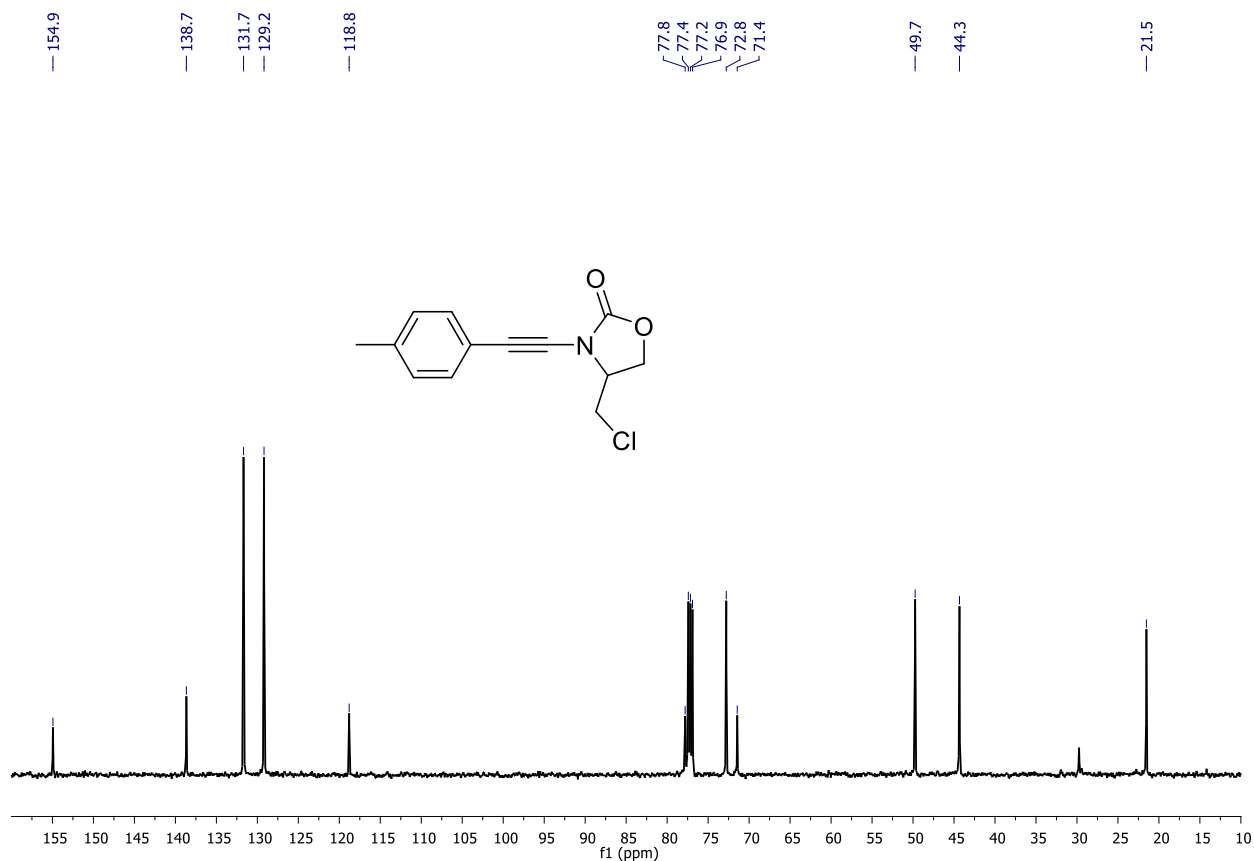

### 4-(chloromethyl)-3-(4-methoxyphenylethynyl)oxazolidin-2-one (5k):

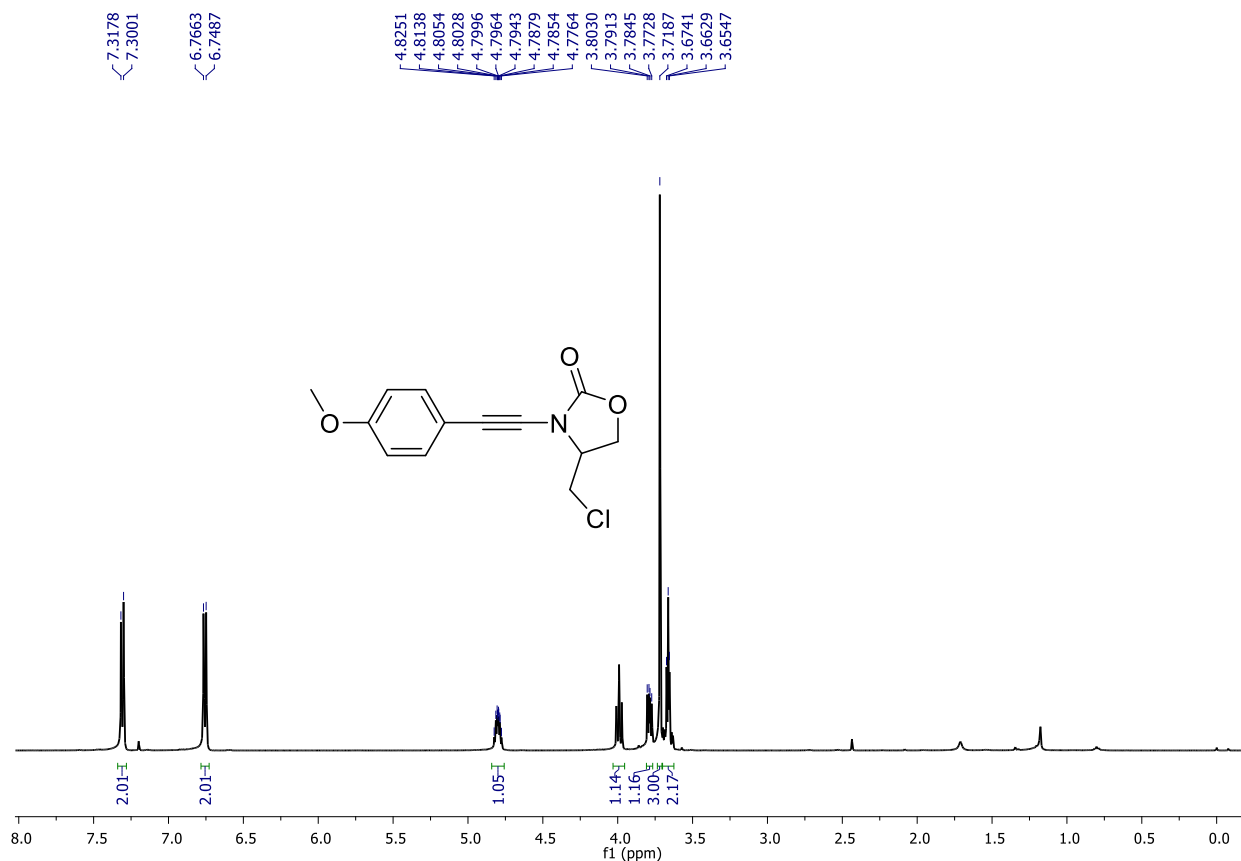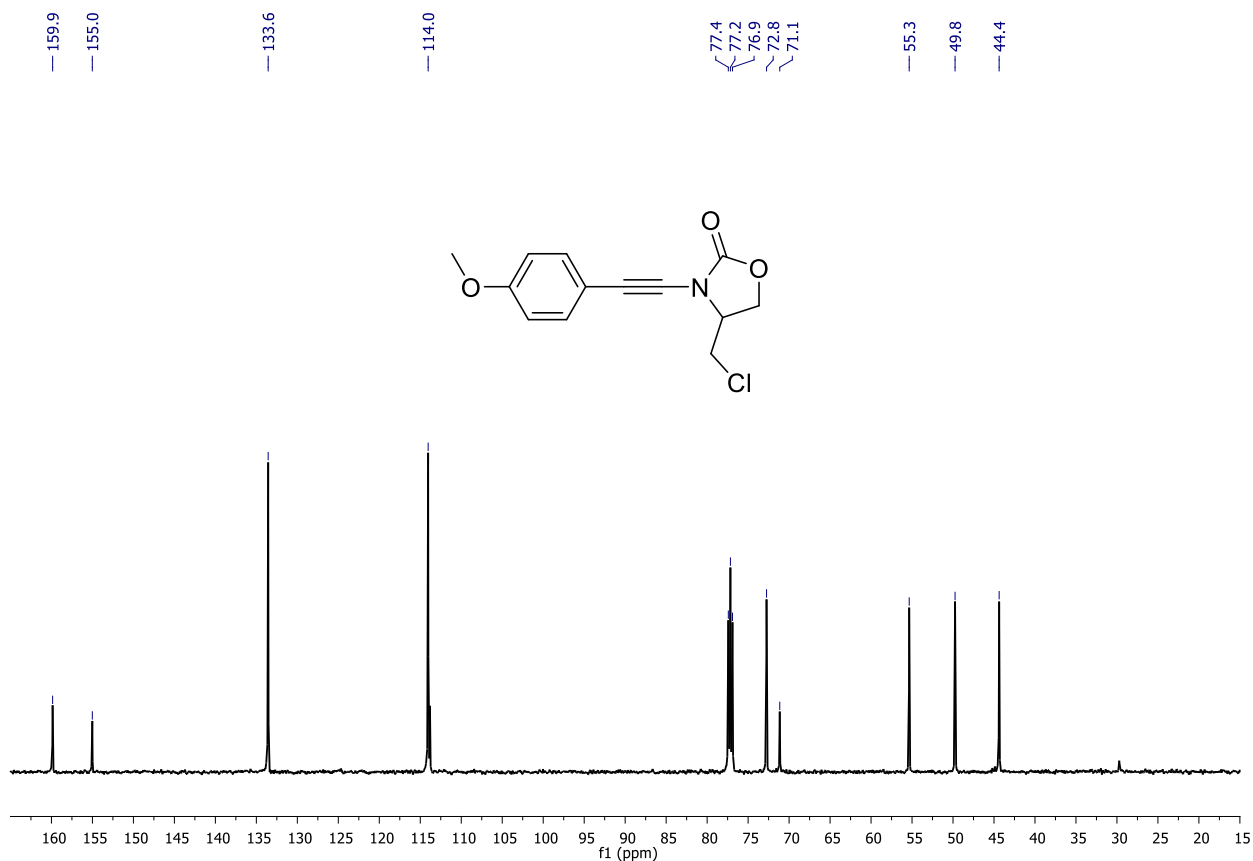

### 4-(chloromethyl)-3-(4-N,N-dimethylaminophenylethynyl)oxazolidin-2-one (5l):

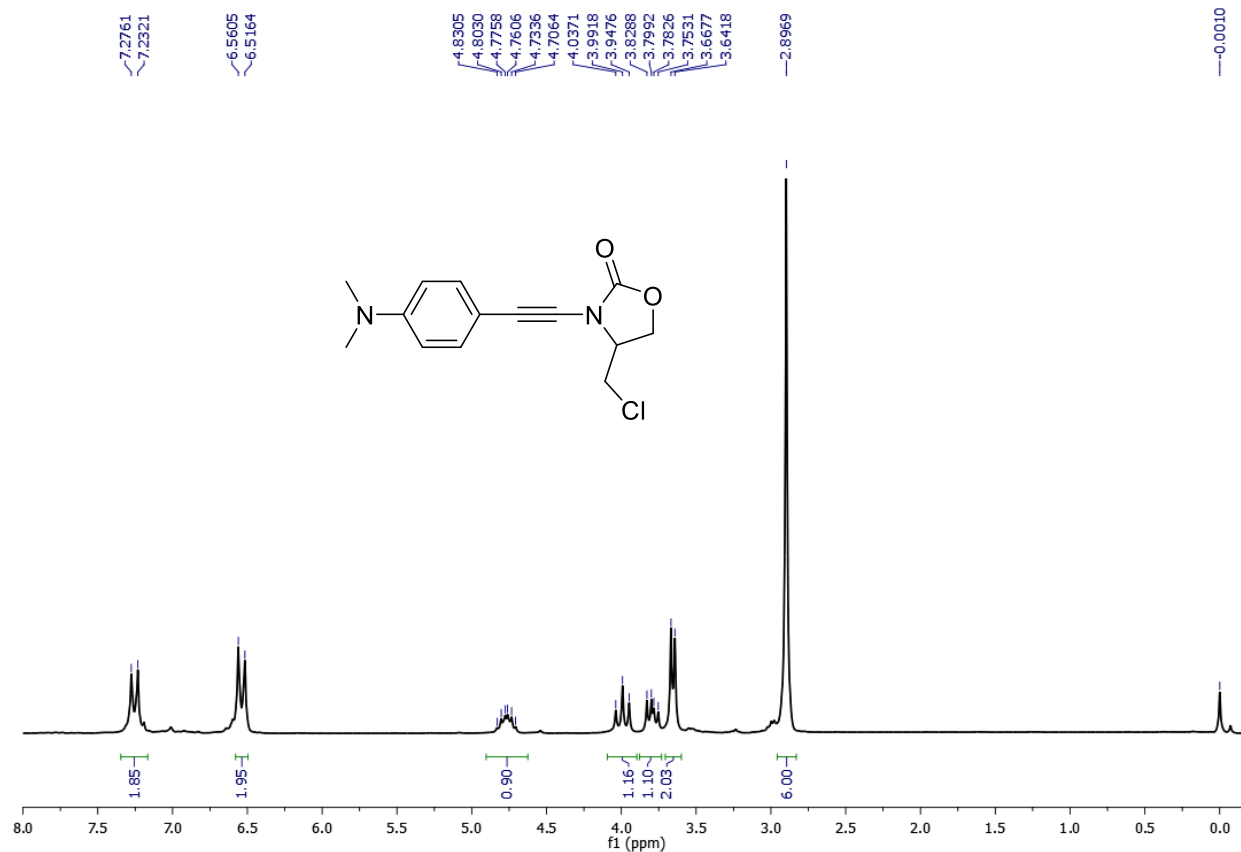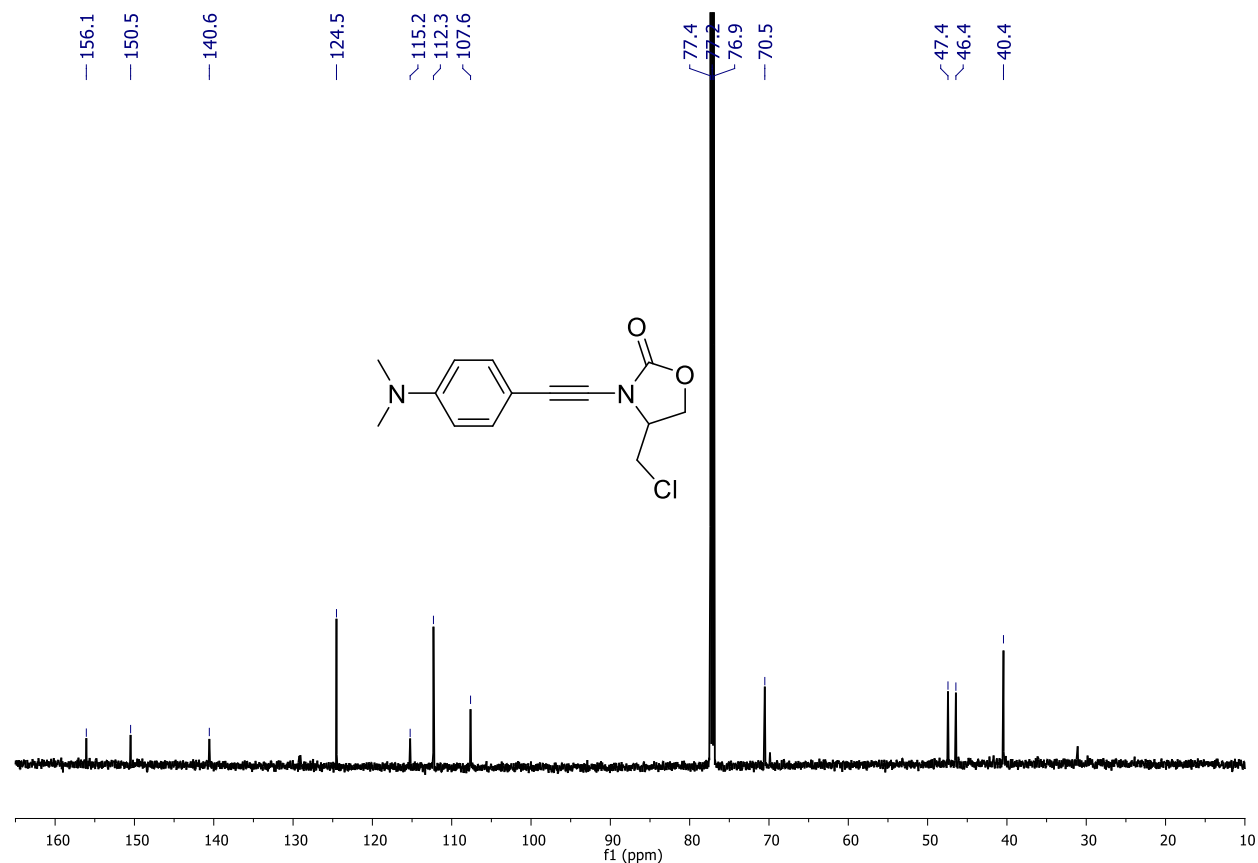



### 4-(chloromethyl)-3-(4-fluorophenylethynyl)oxazolidin-2-one (5m):

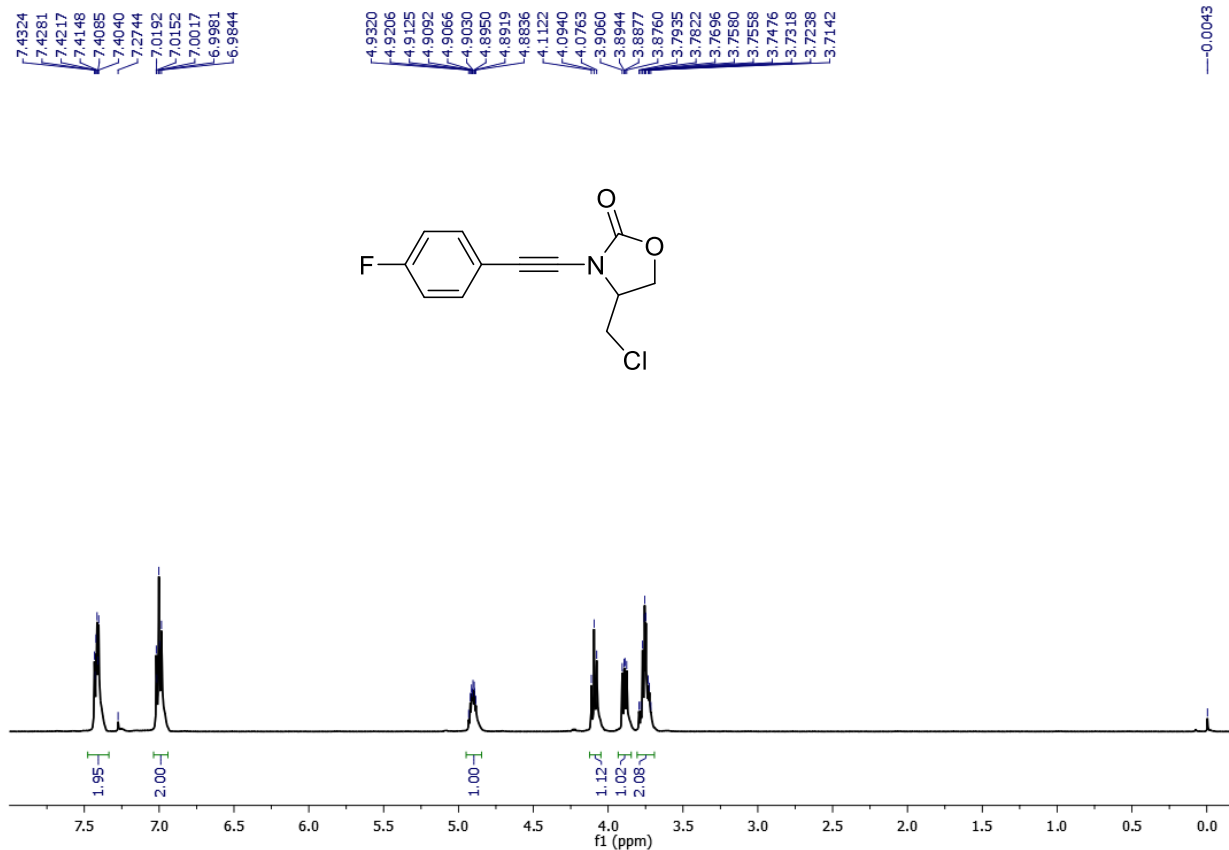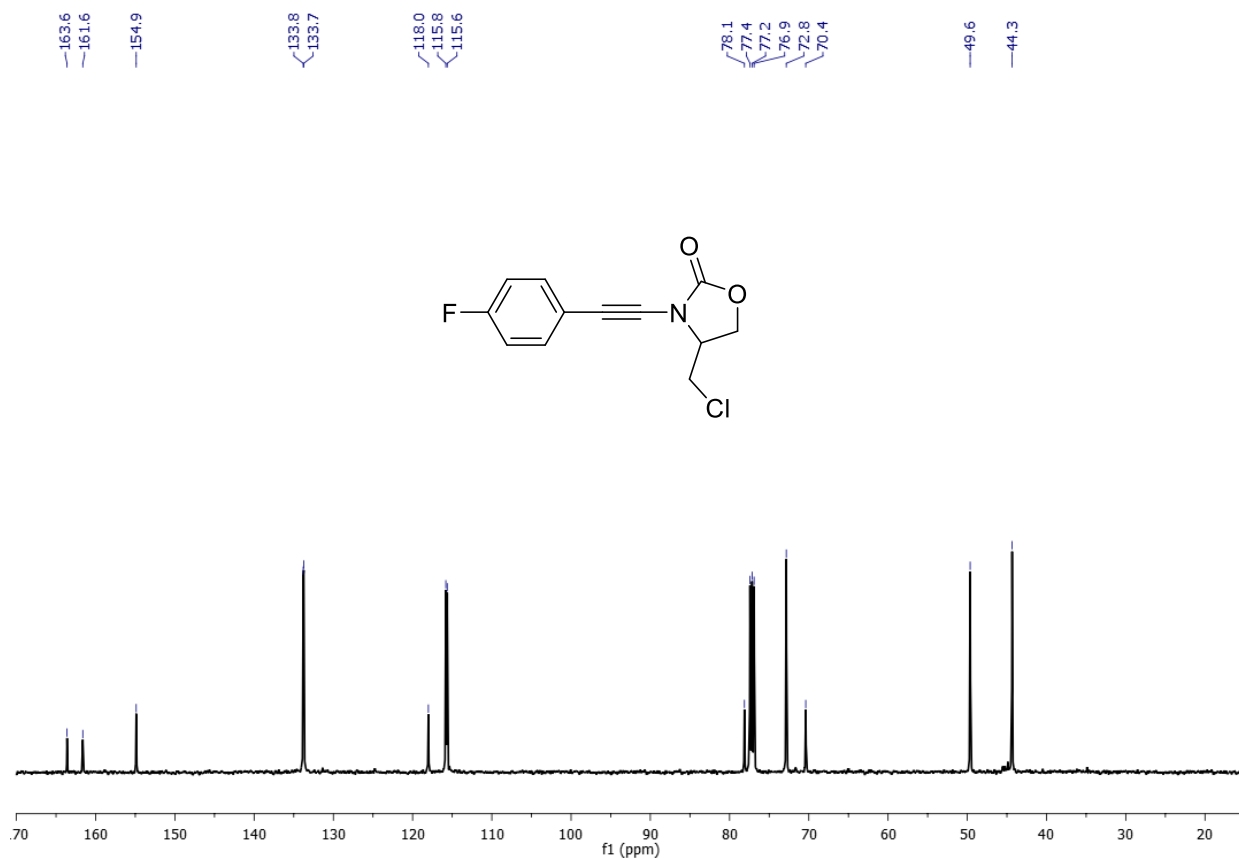

**(S) 4-Benzyl-3-(4-methylphenylethynyl)oxazolidin-2-one (5n):**

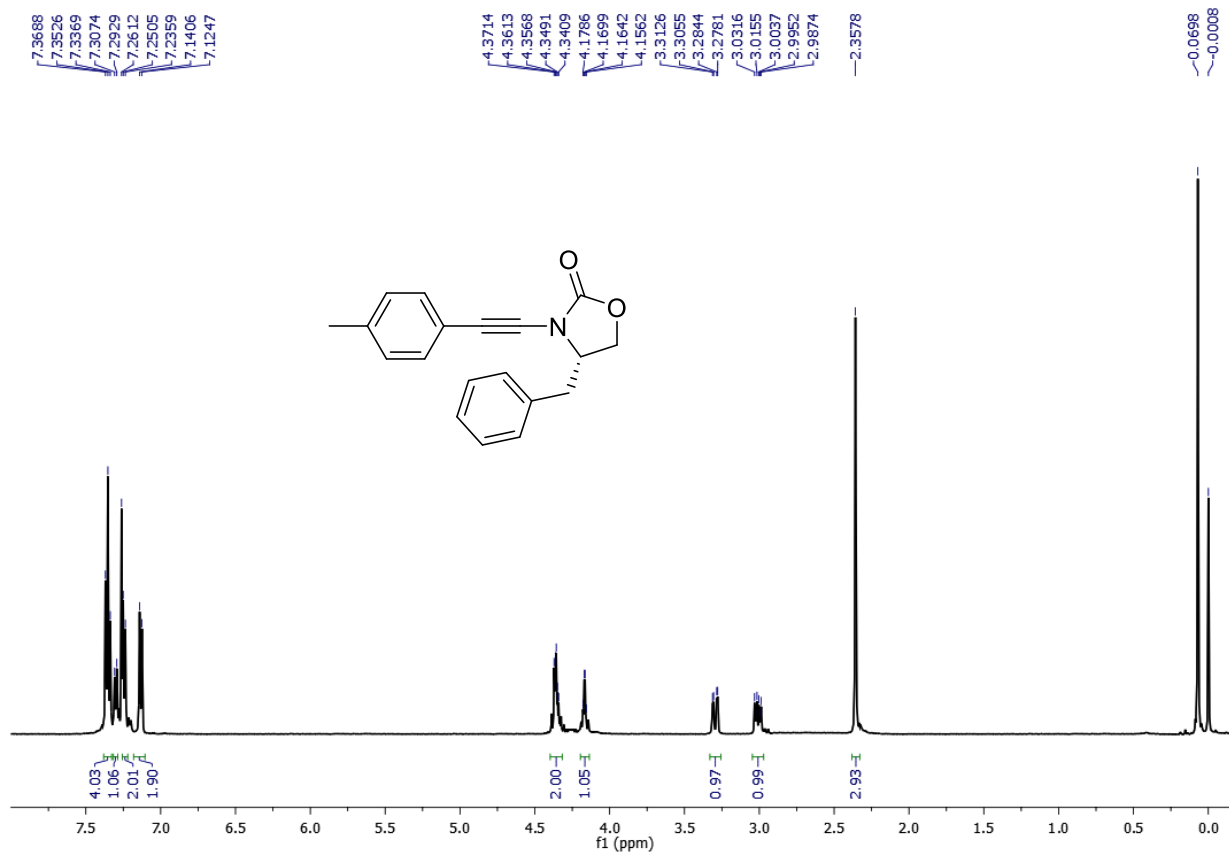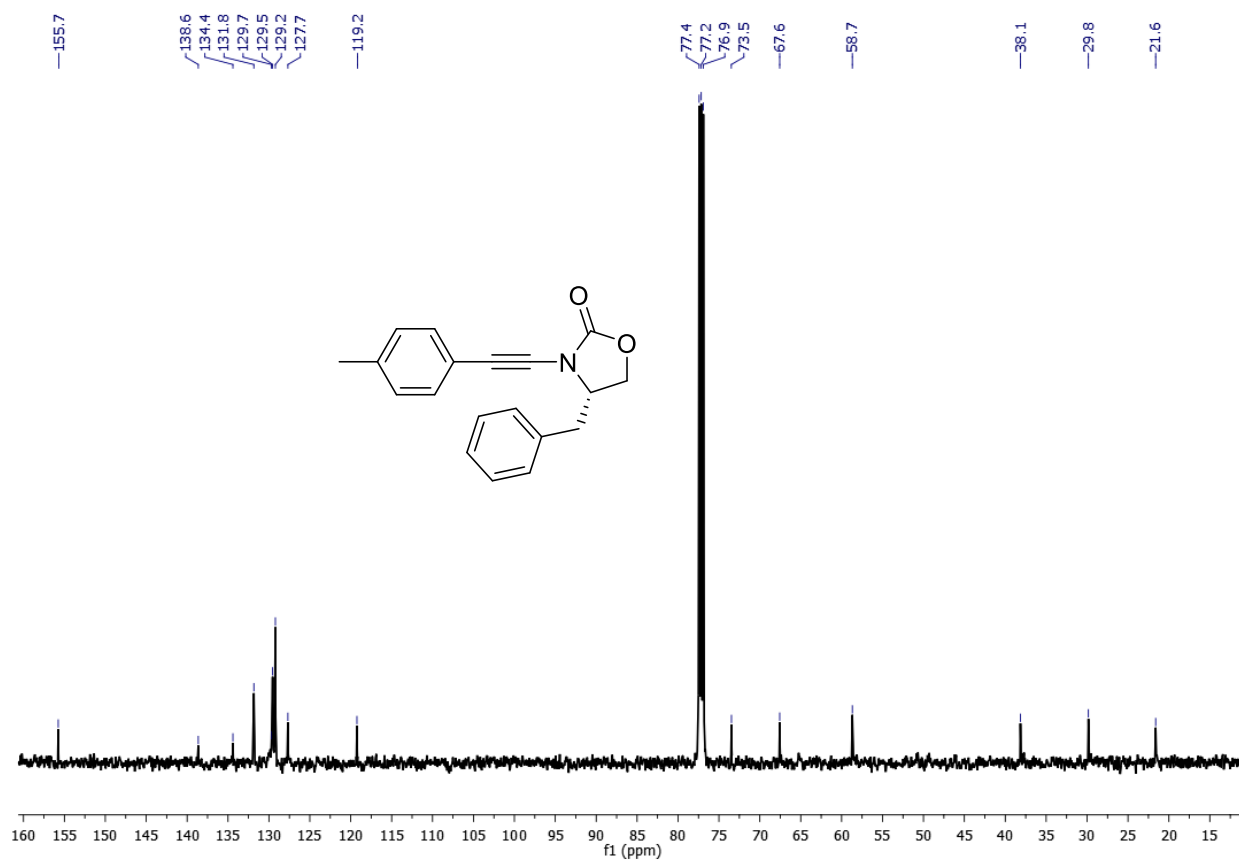

**(S) 4-Benzyl-3-(4-methoxyphenylethynyl)oxazolidin-2-one (5o):**

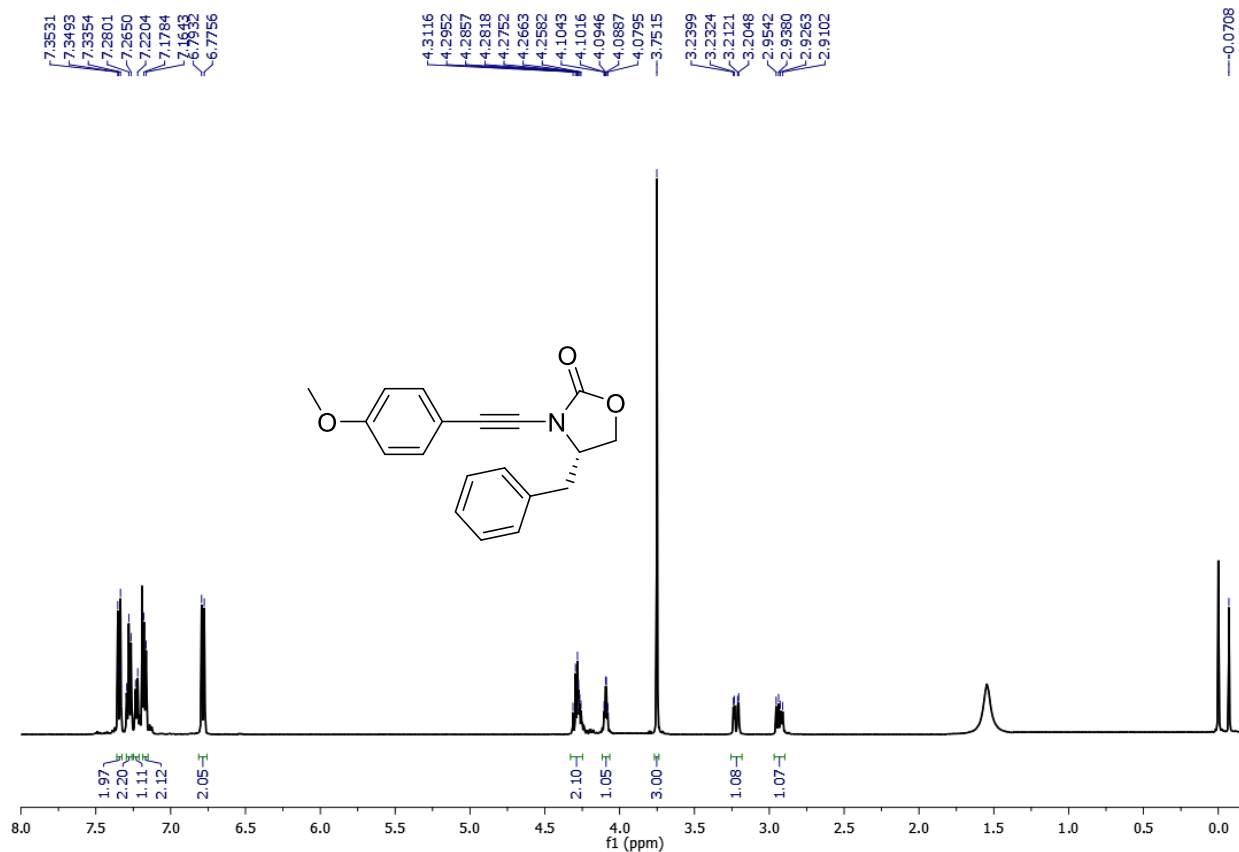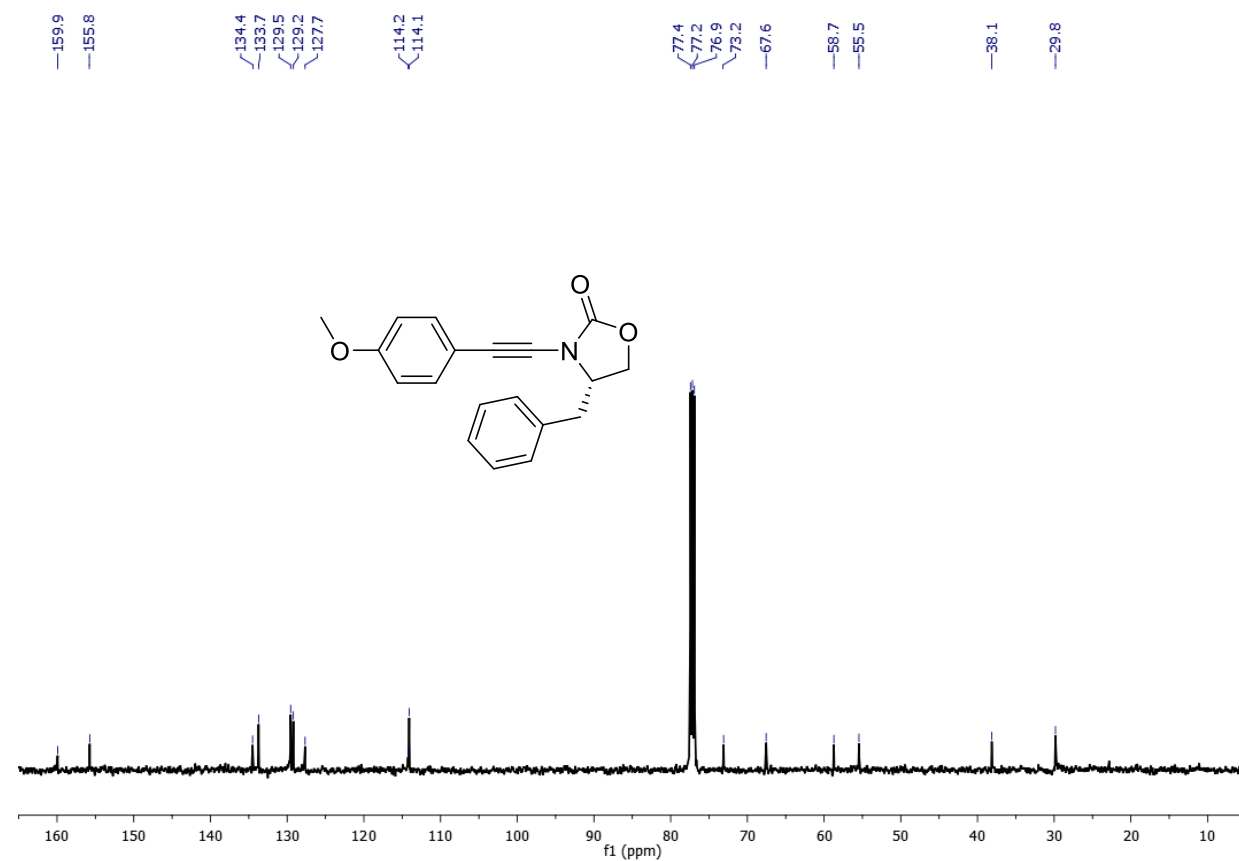

**(S)-4-Benzyl-3-(4-bromophenylethynyl)oxazolidin-2-one (5p):**

7.4609  
7.4441  
7.3540  
7.3387  
7.3105  
7.3057  
7.2970  
7.2889  
7.2615  
7.2459  
7.2316

4.4078  
4.3915  
4.3821  
4.3779  
4.3643  
4.3552  
4.1906  
4.1814  
4.1753  
4.1665  
3.2961  
3.2881  
3.2682  
3.2605  
3.0305  
3.0147  
3.0025  
2.9866

-0.0003

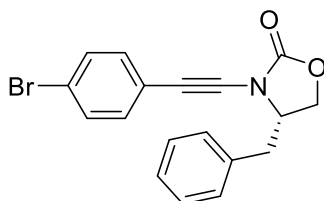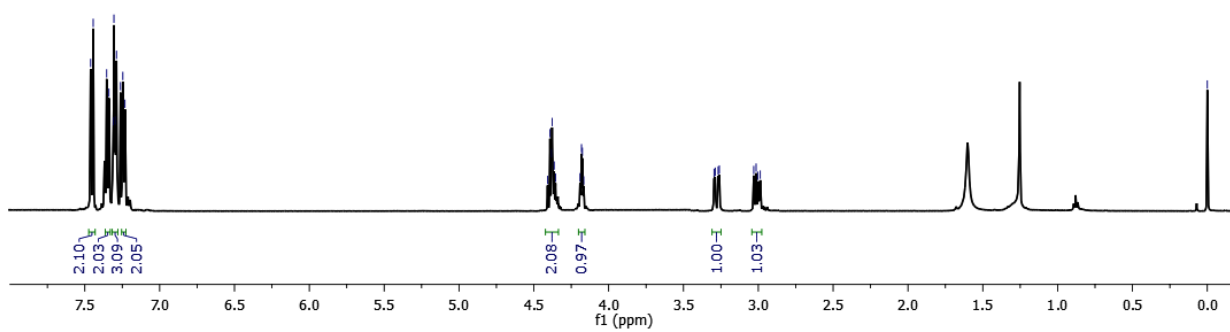

155.5  
134.3  
133.1  
131.7  
129.5  
129.2  
128.1  
127.8  
122.6  
121.3

79.2  
77.4  
77.2  
76.9  
72.6  
67.7

58.6

38.3

31.1

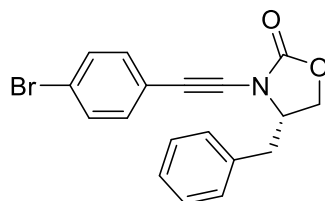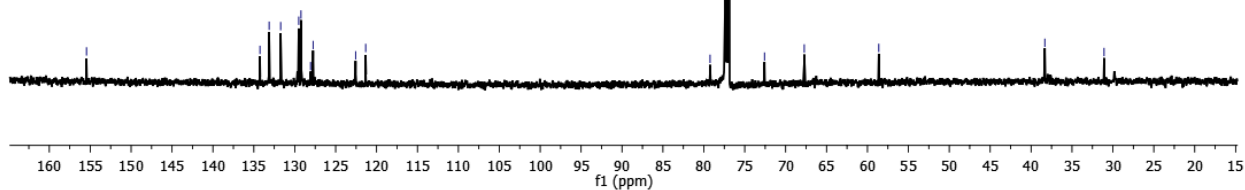

### 3[(6-methoxynaphthalen-2yl)ethynyl]oxazolidin-2-one (5q):

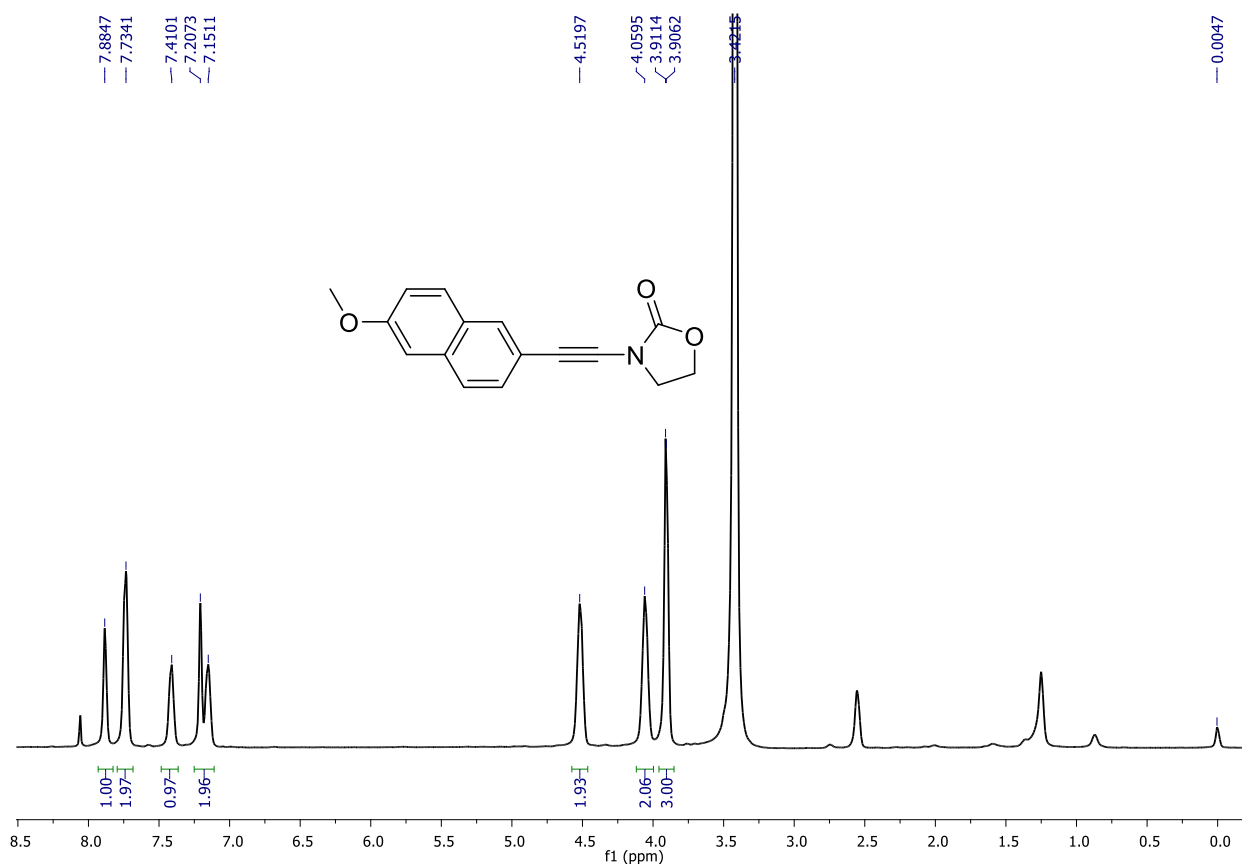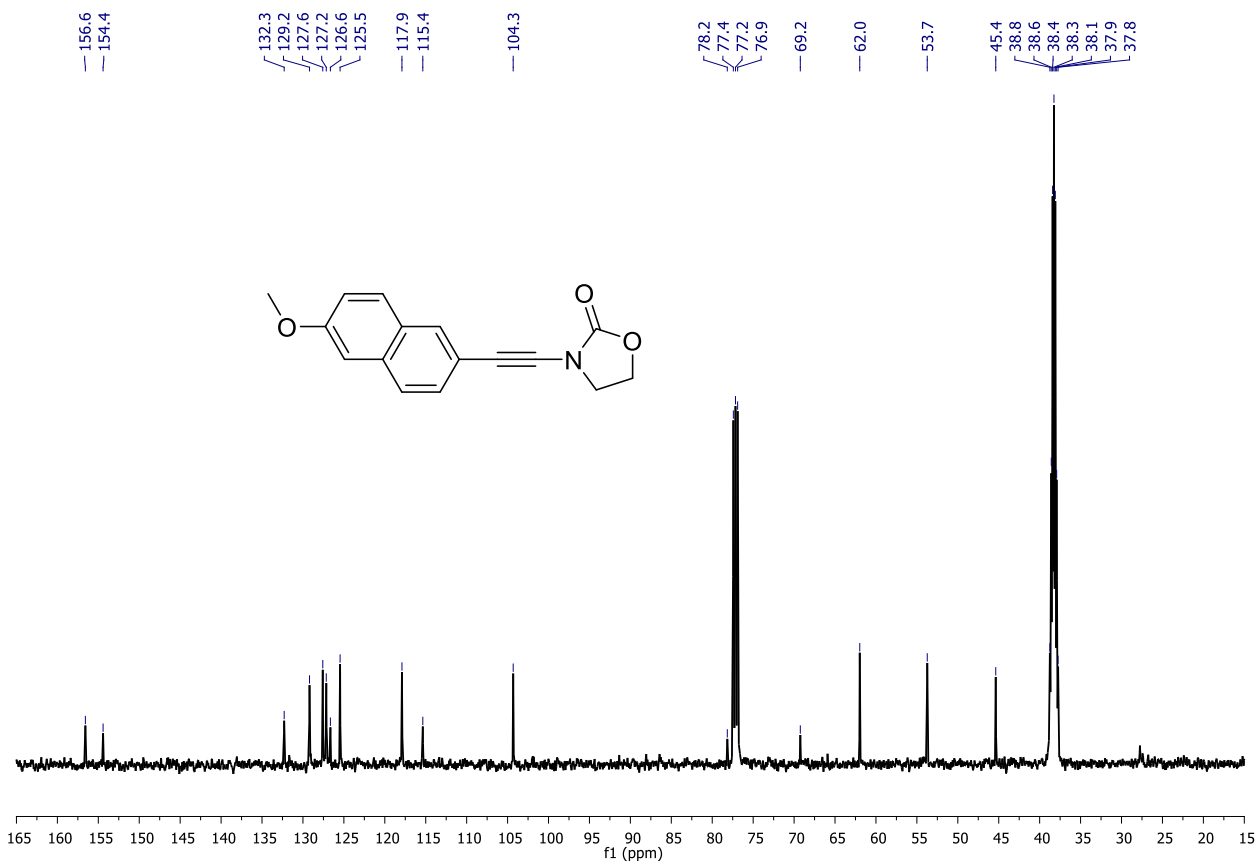

**4-(chloromethyl)-3-[(6-methoxynaphthalen-2yl)ethynyl]oxazolidin-2-one (5r):**

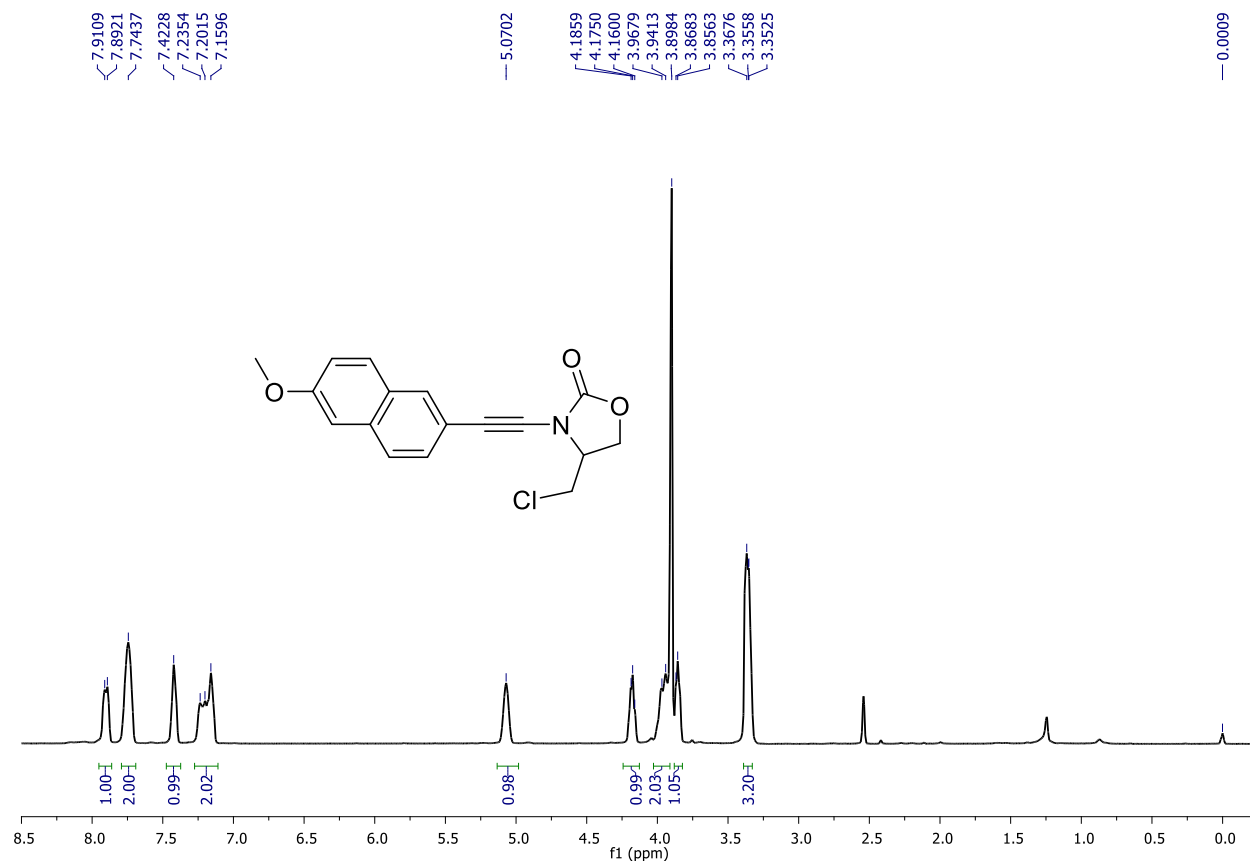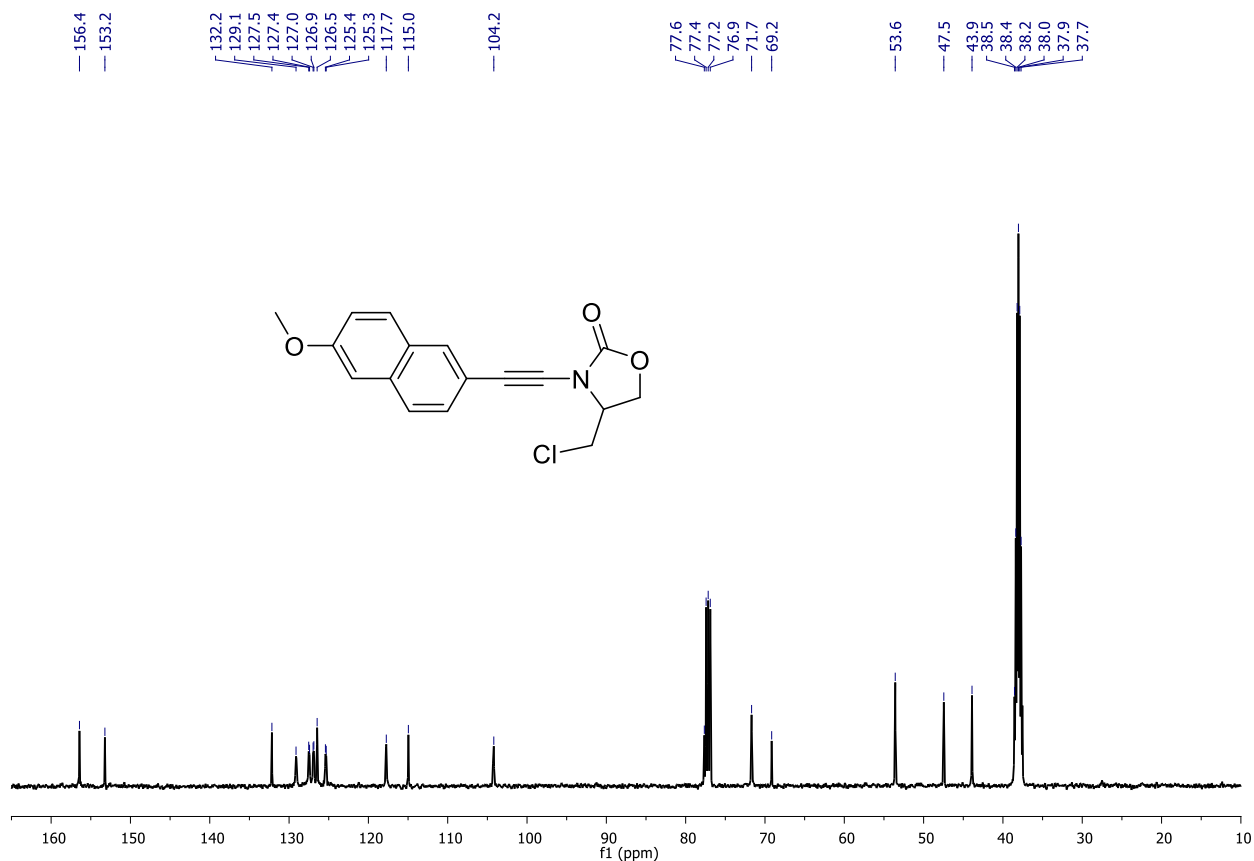

**(S)-4-Benzyl-3-[(6-methoxynaphthalen-2-yl)ethynyl]oxazolidin-2-one (5s):**

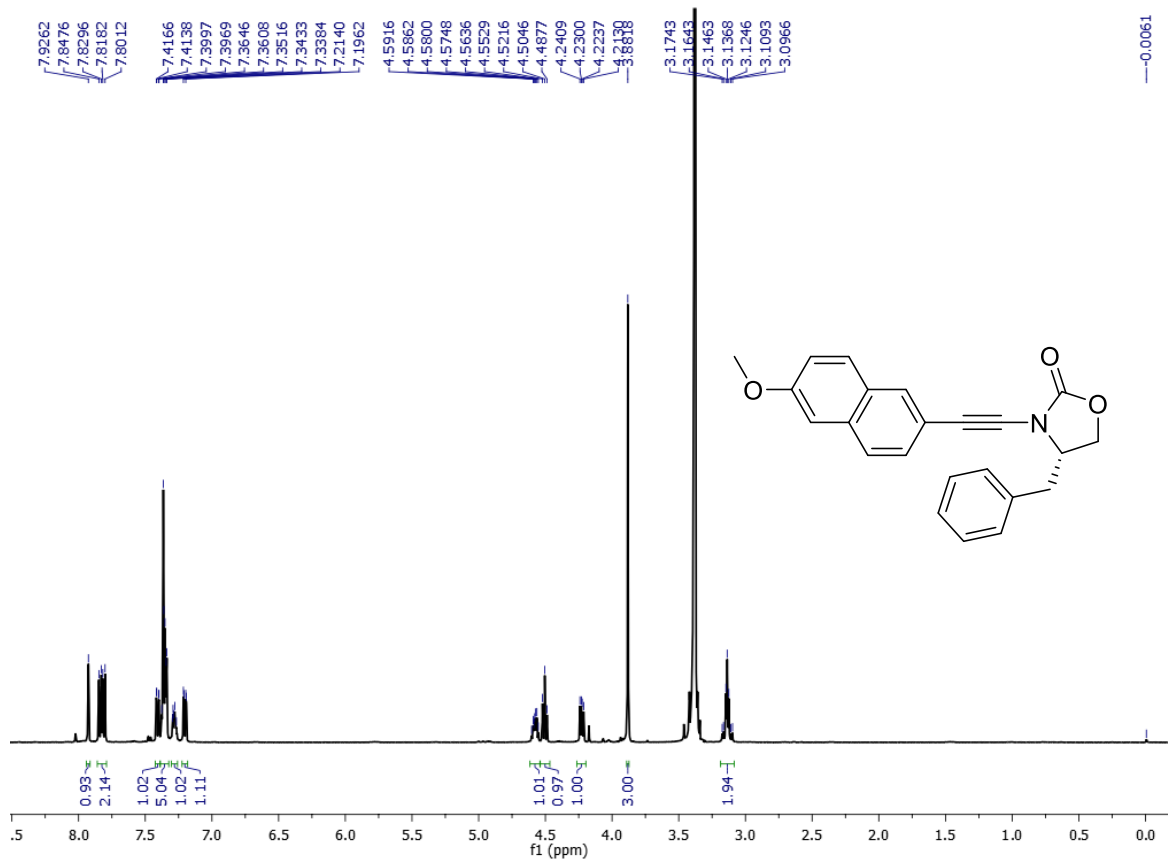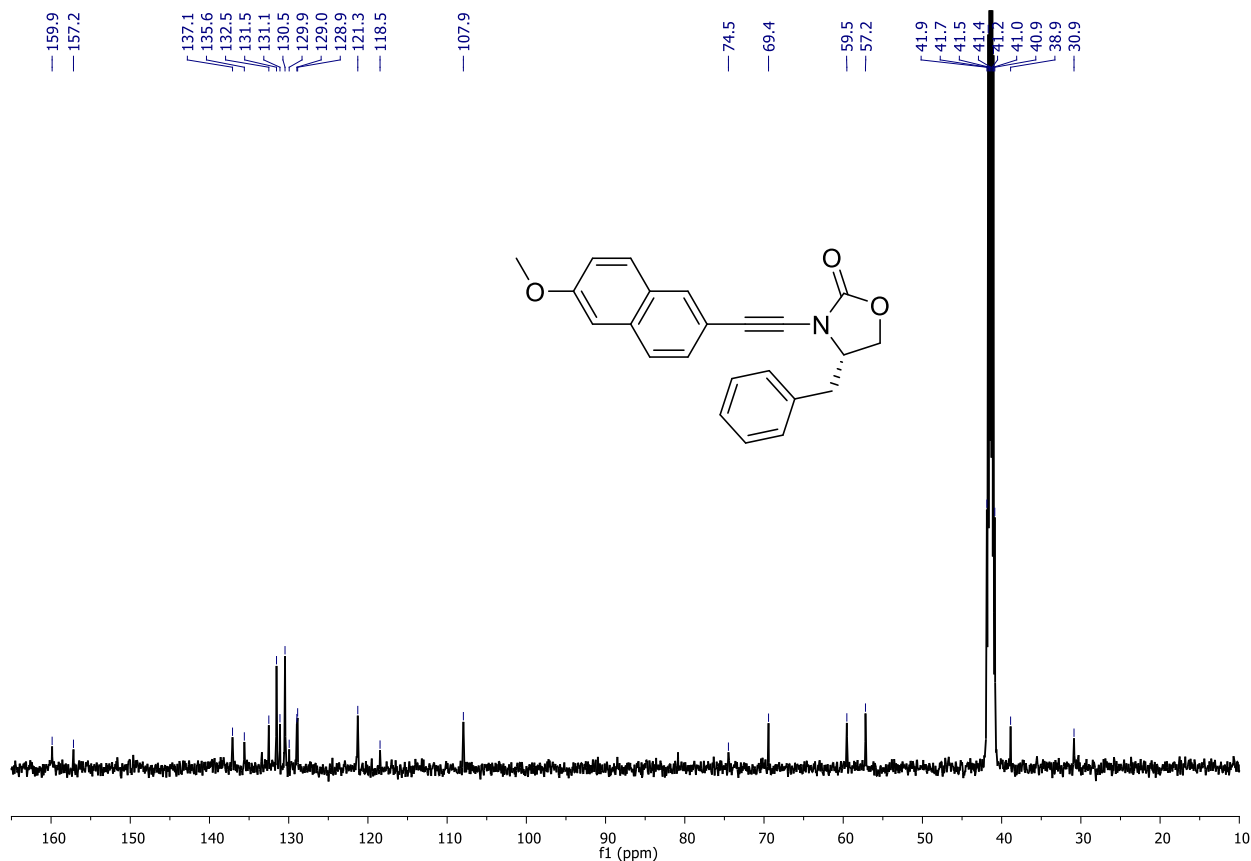

### 3-(cyclohex-1-en-1-ylethynyl)oxazolidin-2-one (5t):

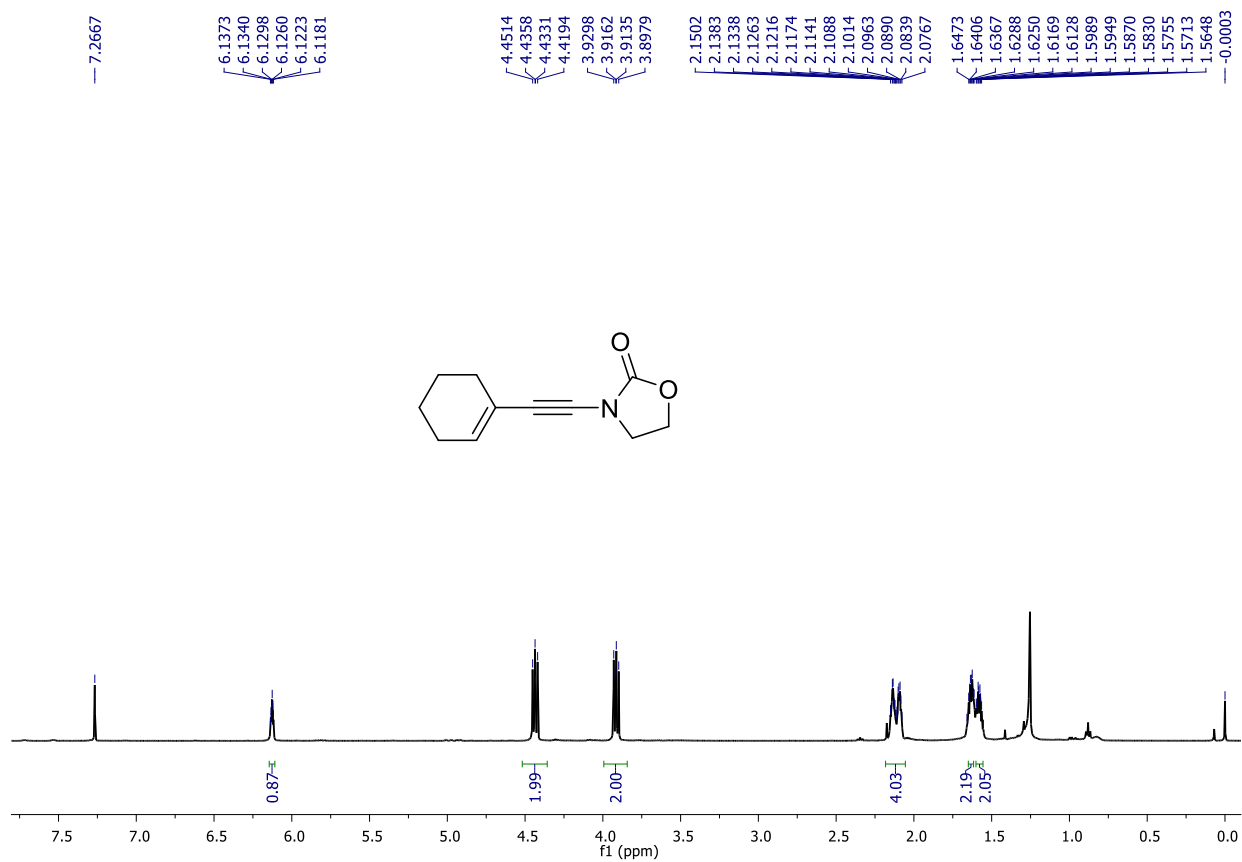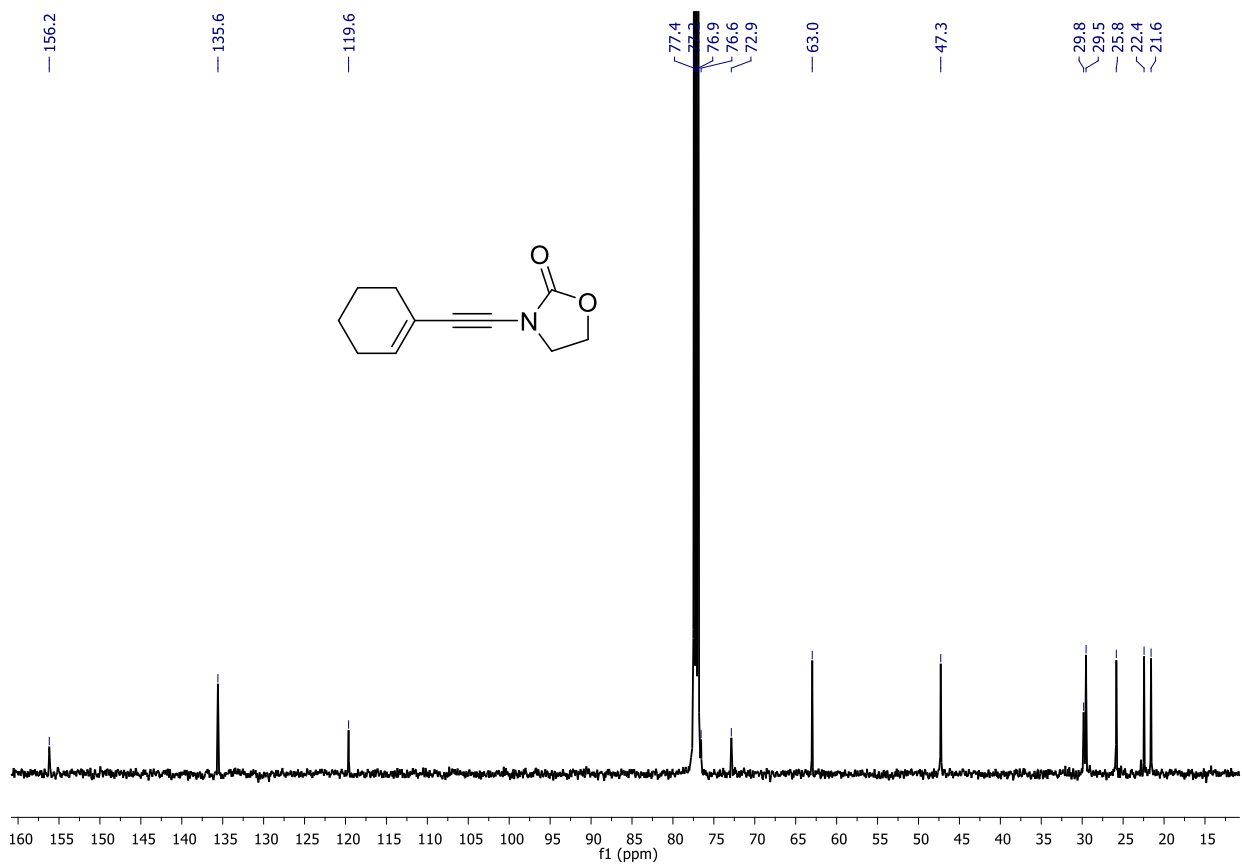



**4-(chloromethyl)-3-(cyclohex-1-en-1-ylethynyl)oxazolidin-2-one (5u):**

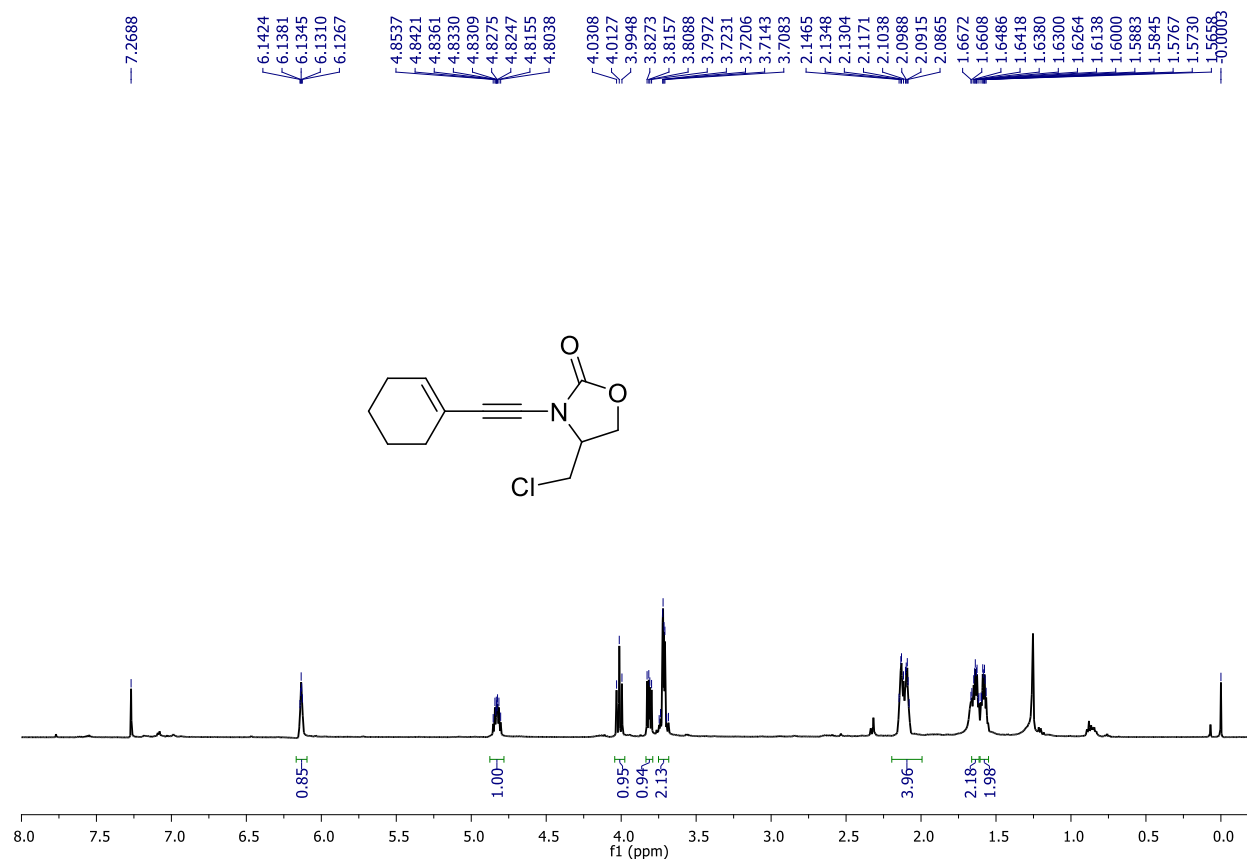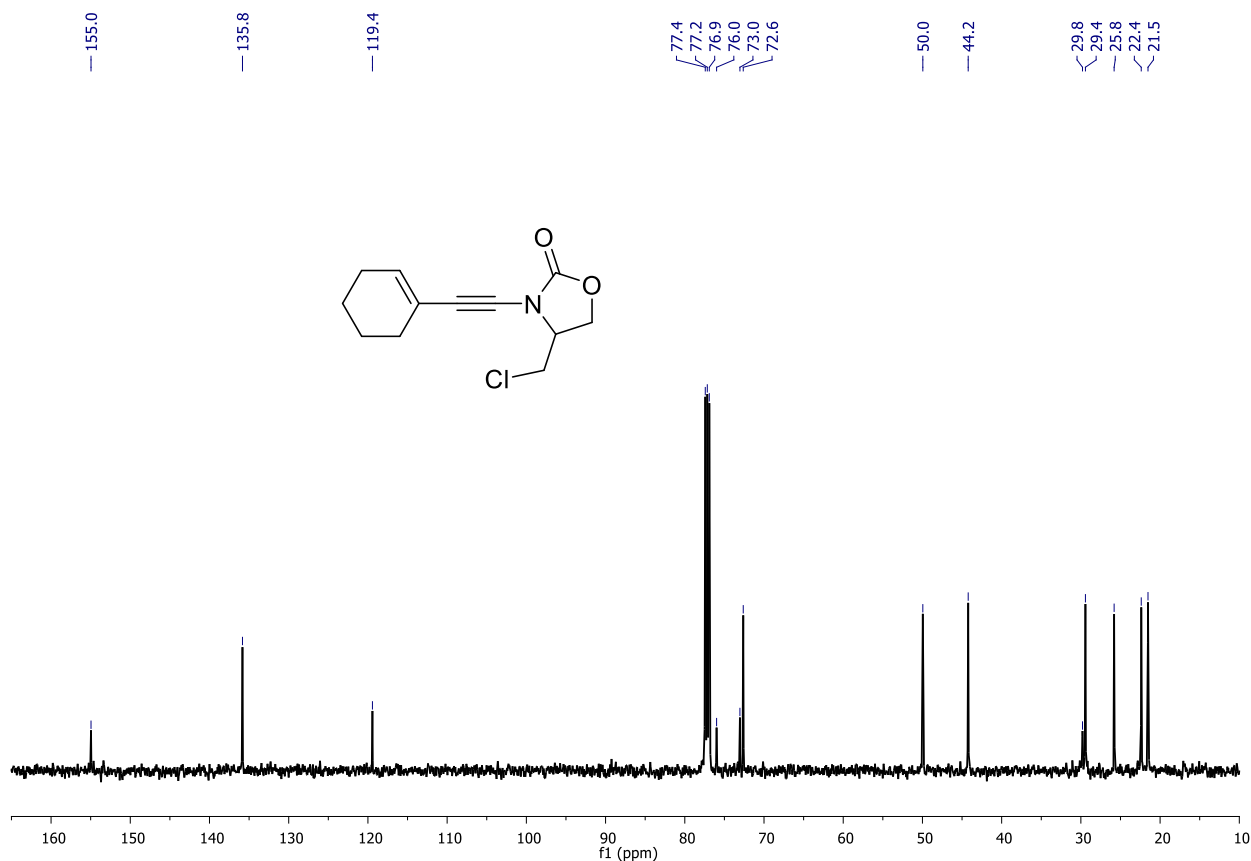

### 3-(2-chlorophenylethynyl)oxazolidin-2-one (5v):

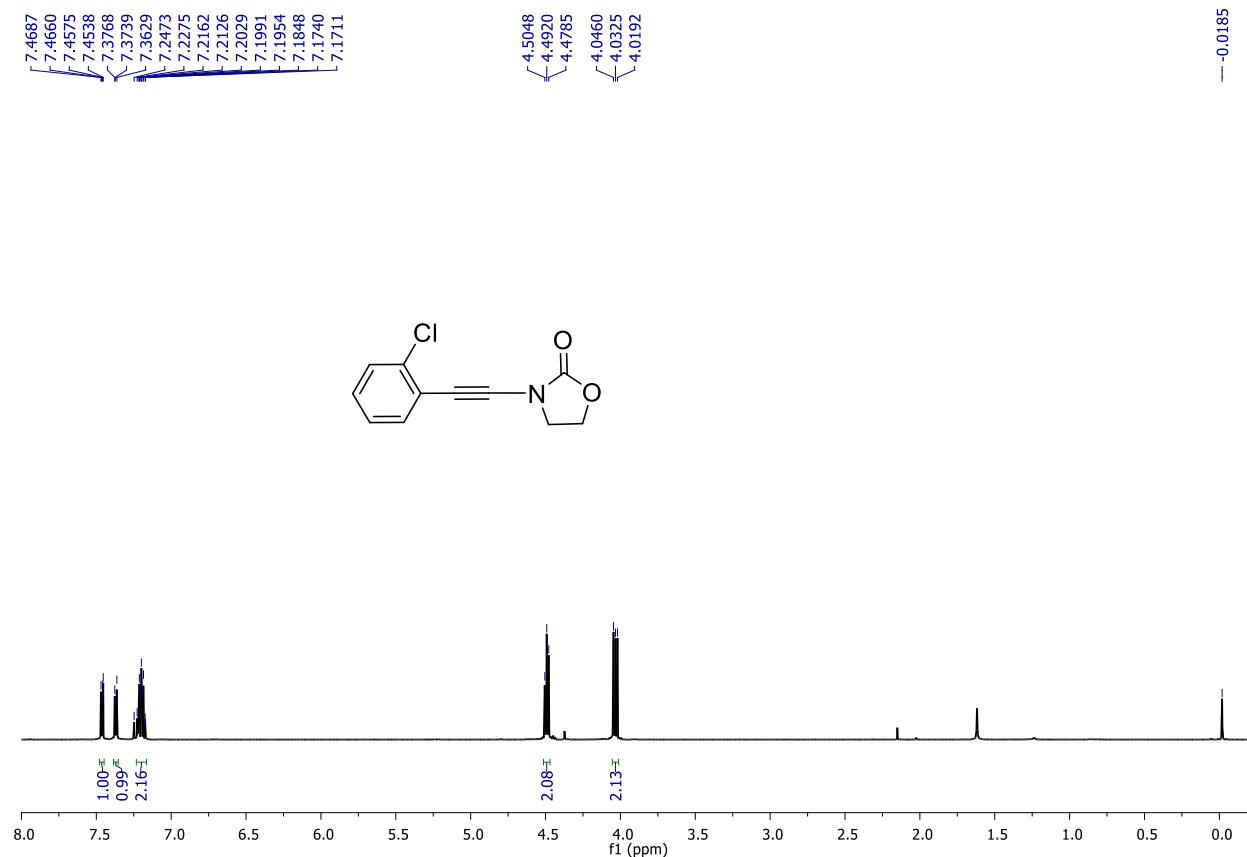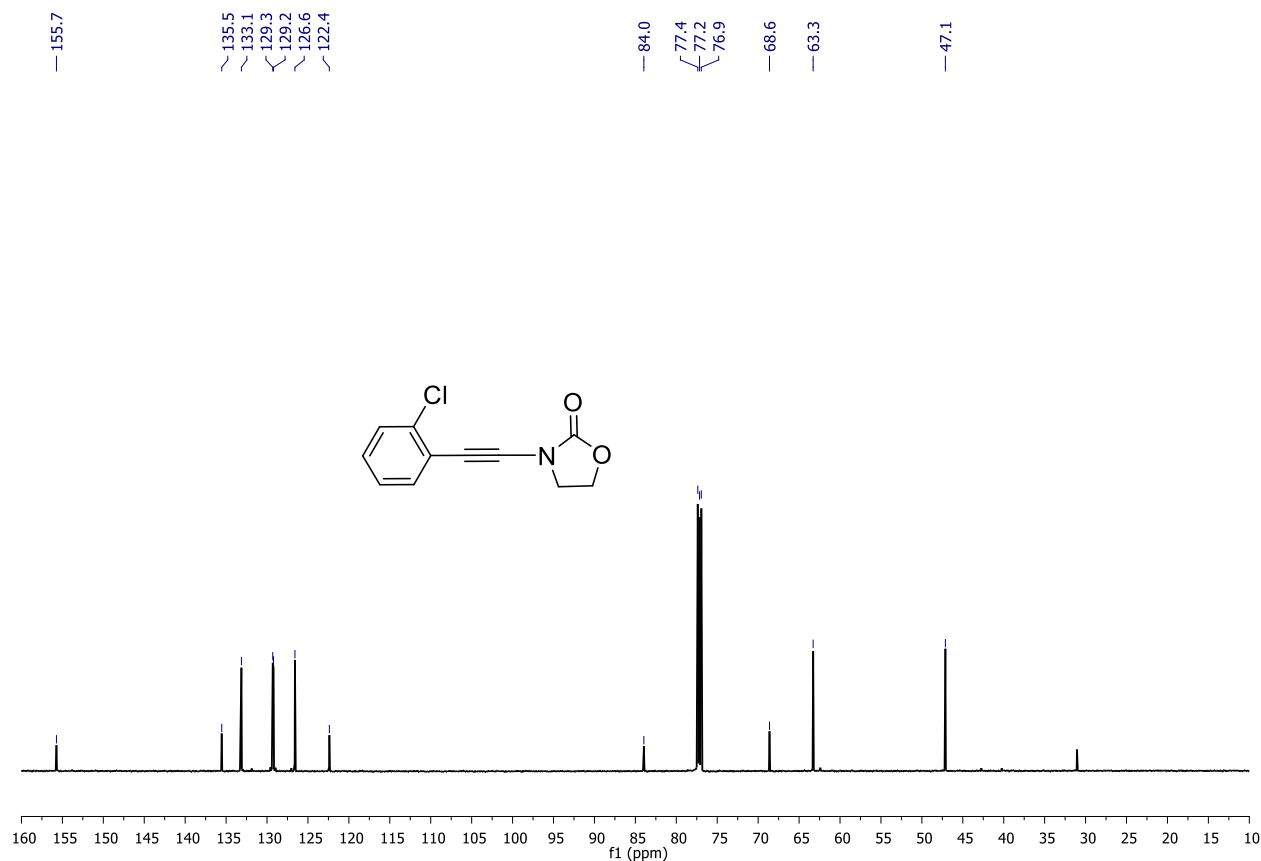

### 3-(2-trifluoromethylphenylethynyl)oxazolidin-2-one (5w):

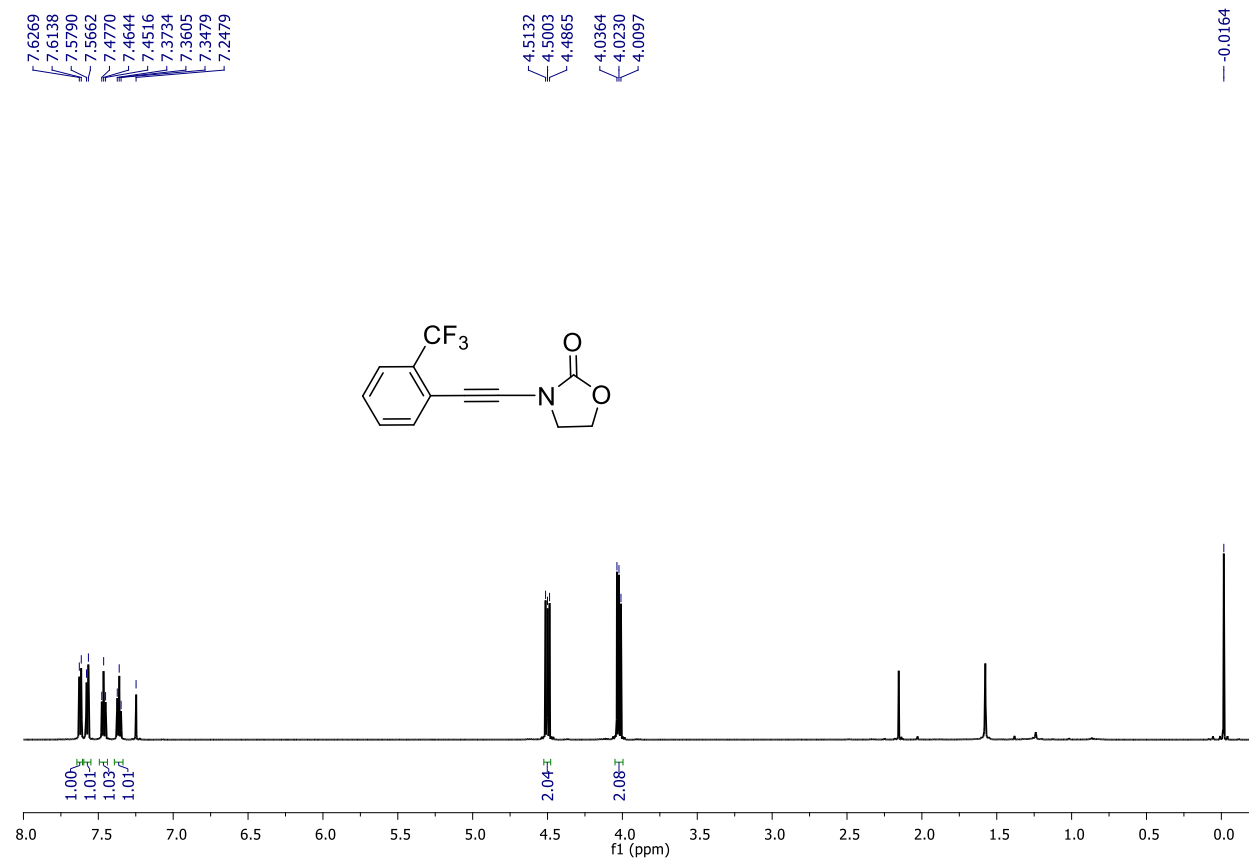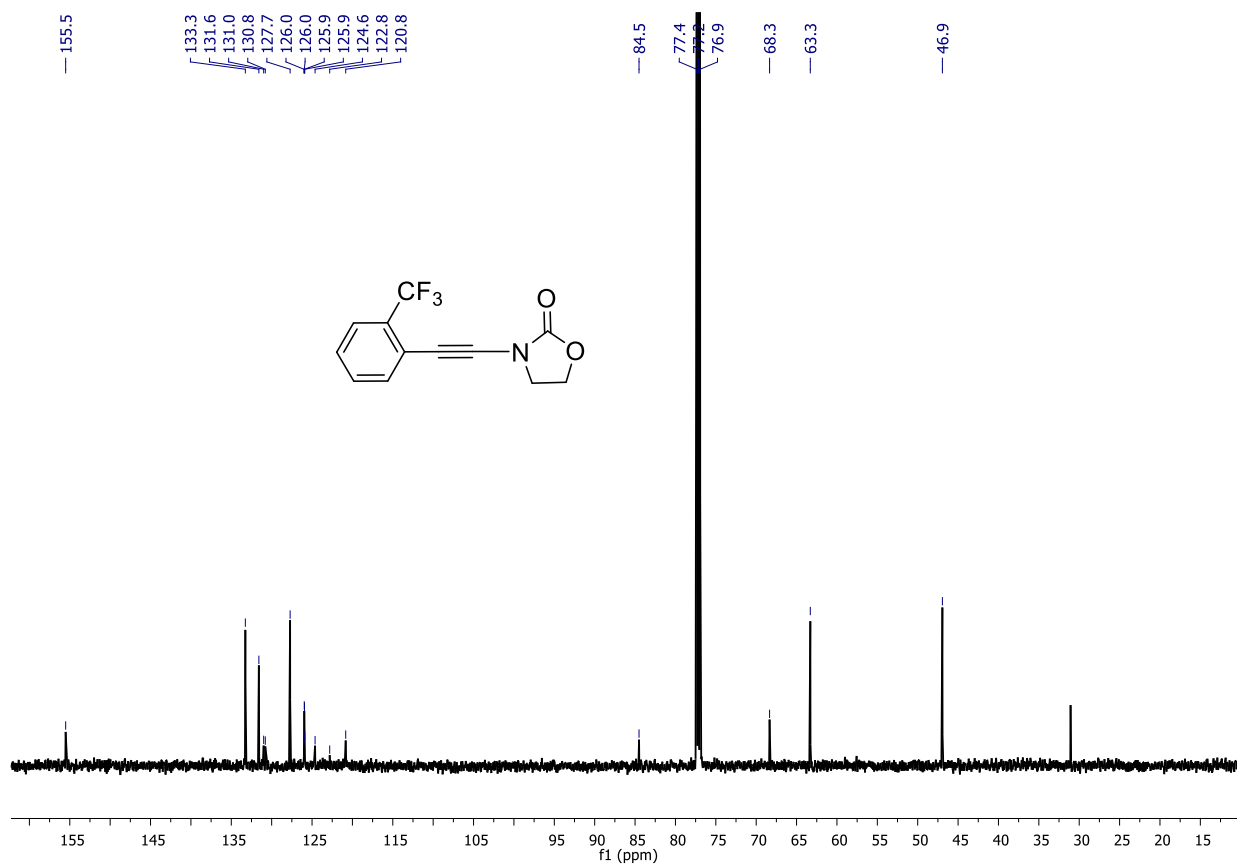

### 3-(2-methoxyphenylethynyl)oxazolidin-2-one (5x):

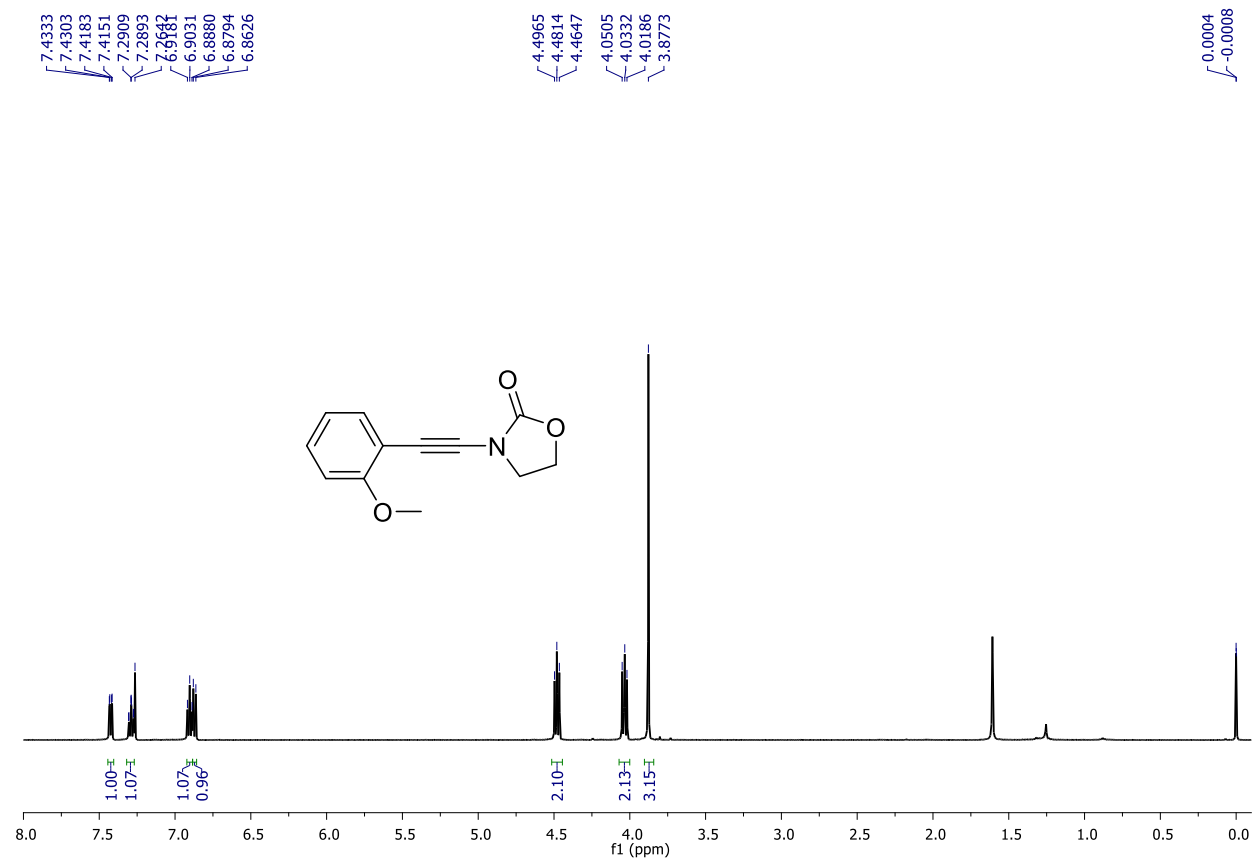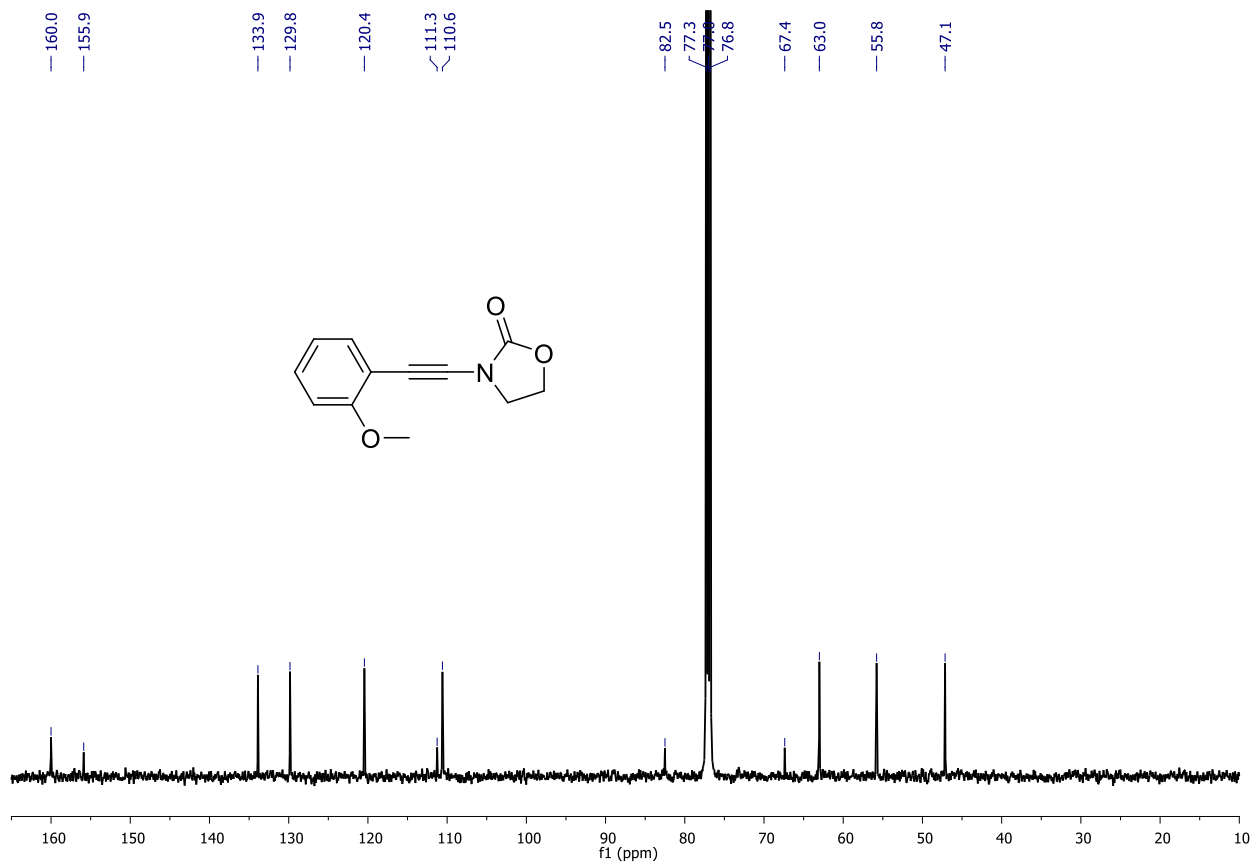

### 4-(chloromethyl)-3-(2-methoxyphenylethynyl)oxazolidin-2-one (5y):

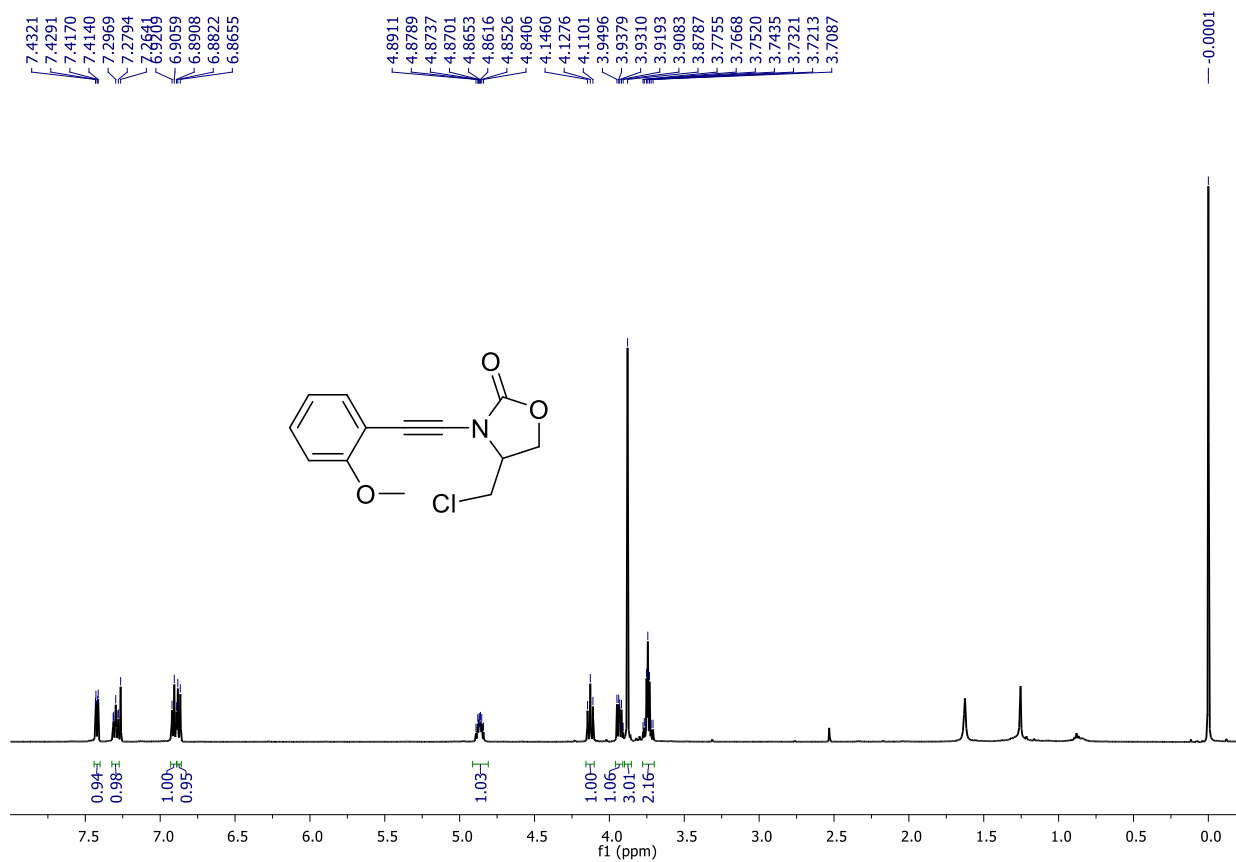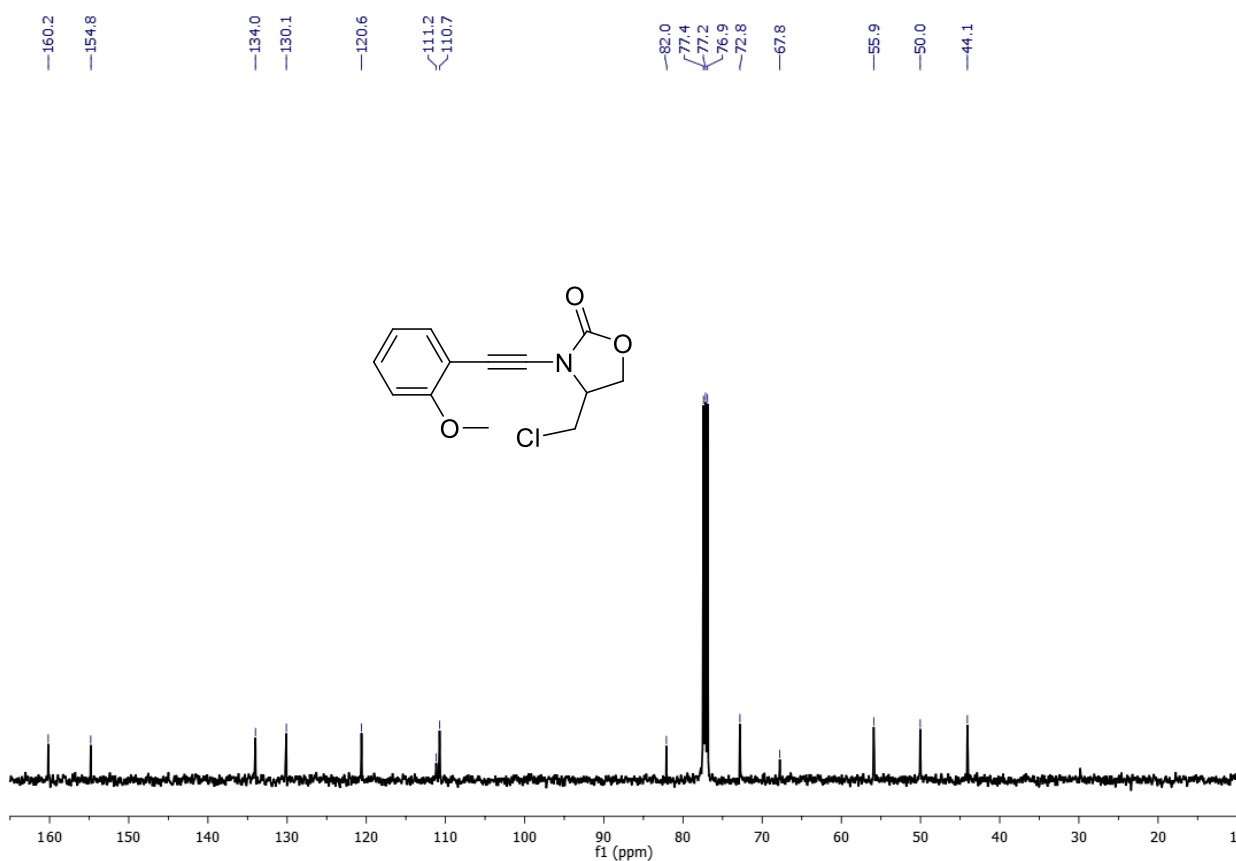

### 3-(3-methylphenylethynyl)oxazolidin-2-one (5z):

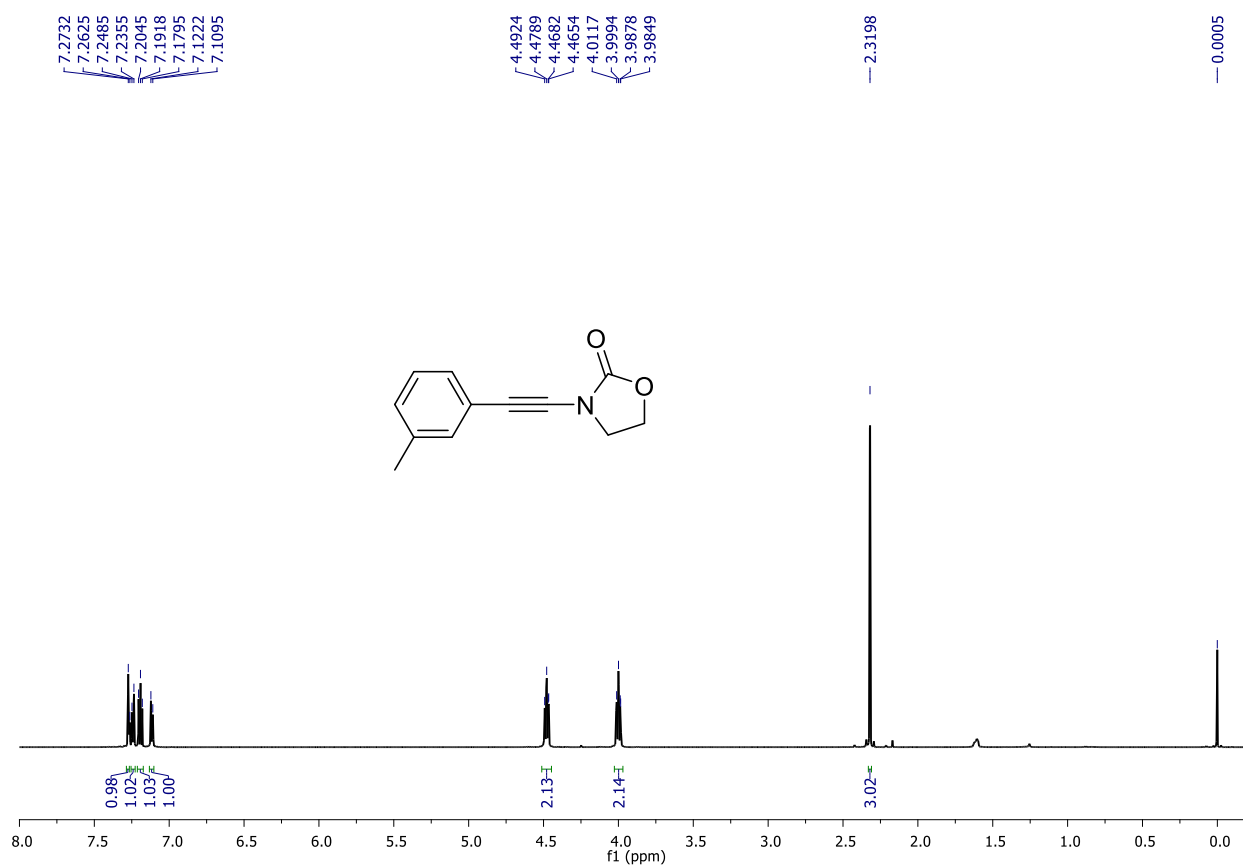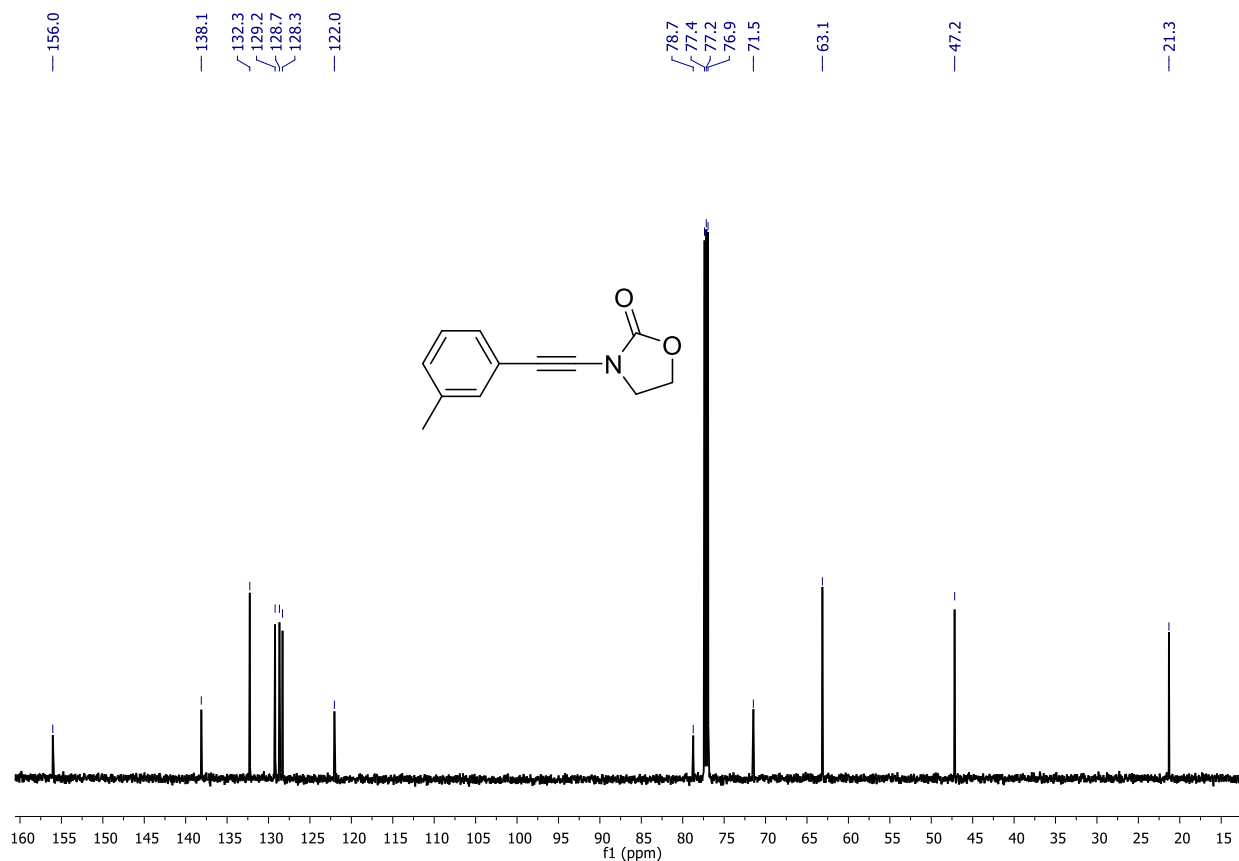

# N,4-dimethyl-N-(phenylethynyl)benzenesulfonamide (5aa):

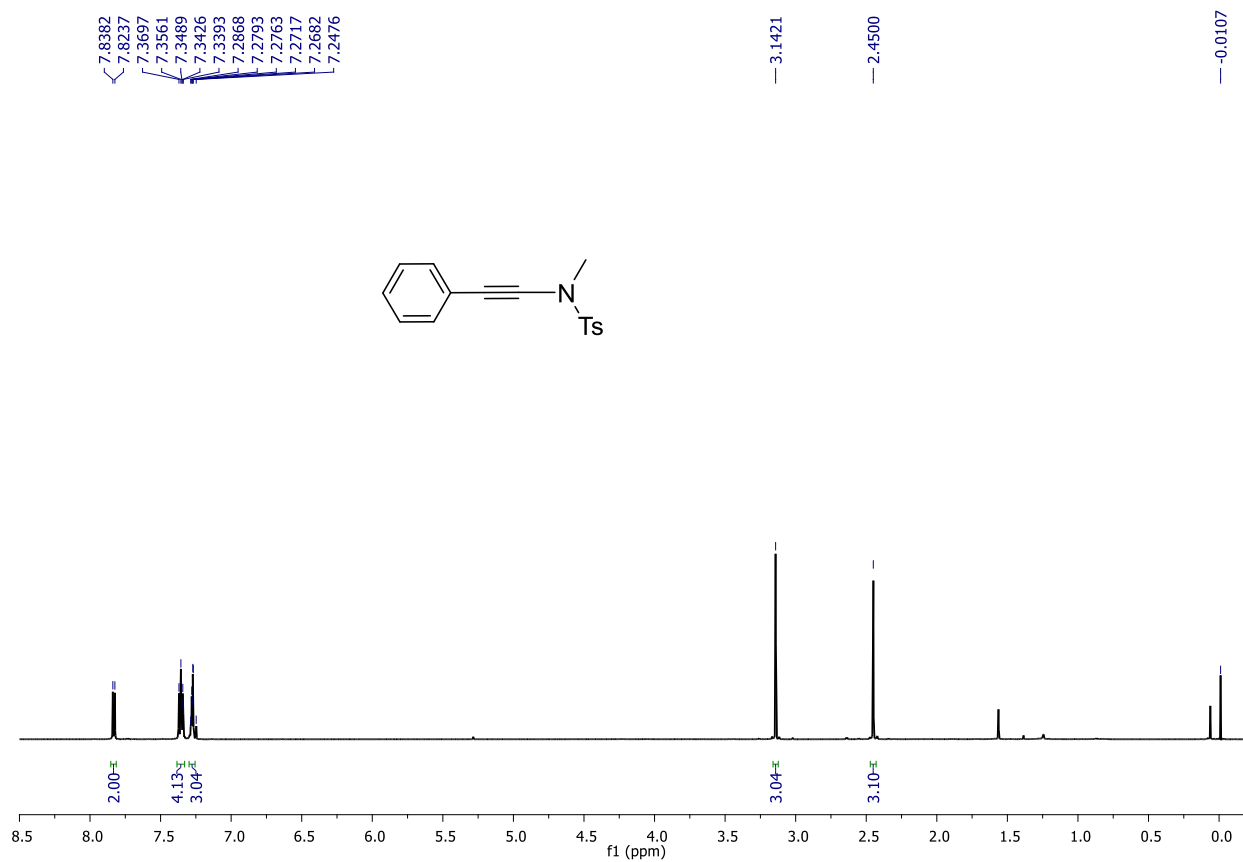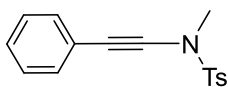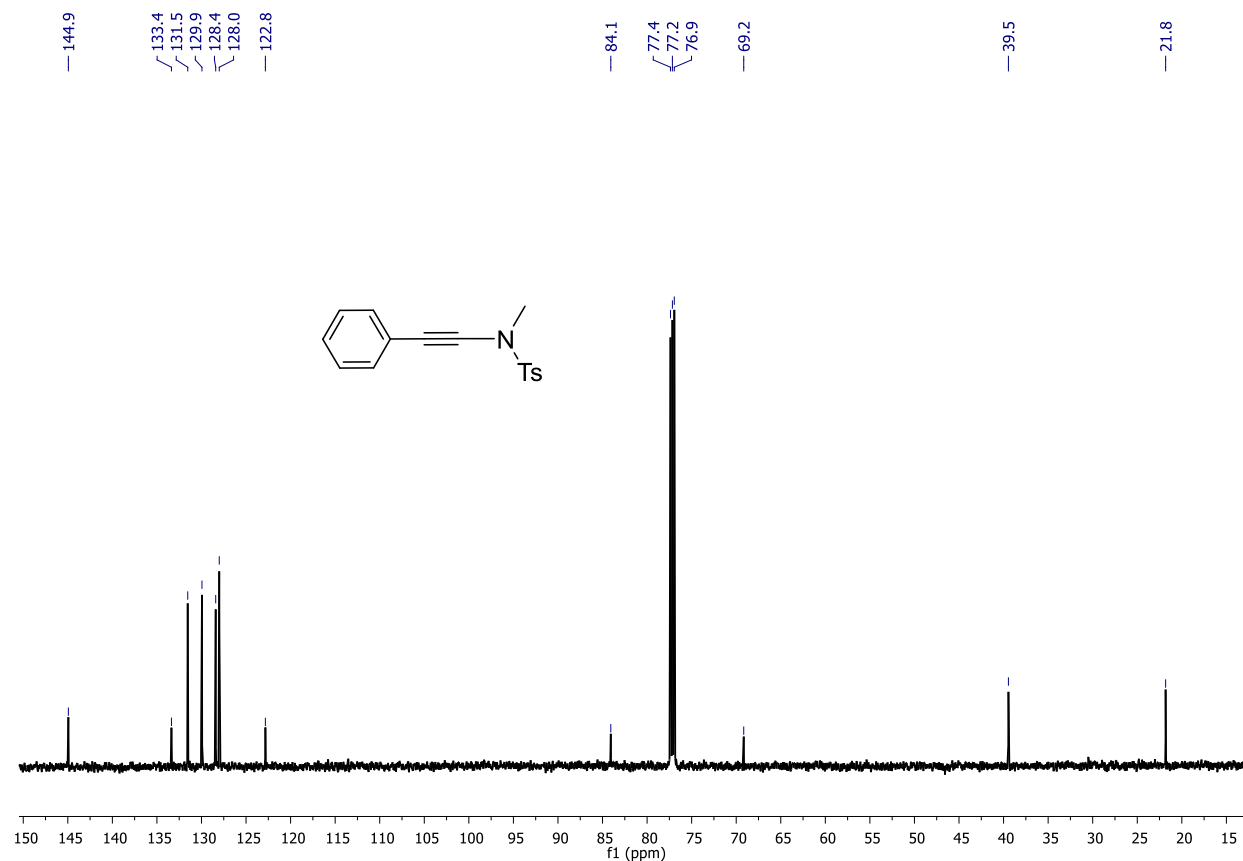

# N, 4-dimethyl-N-(2-(trifluoromethyl)phenylethynyl)benzenesulfonamide (5ab):

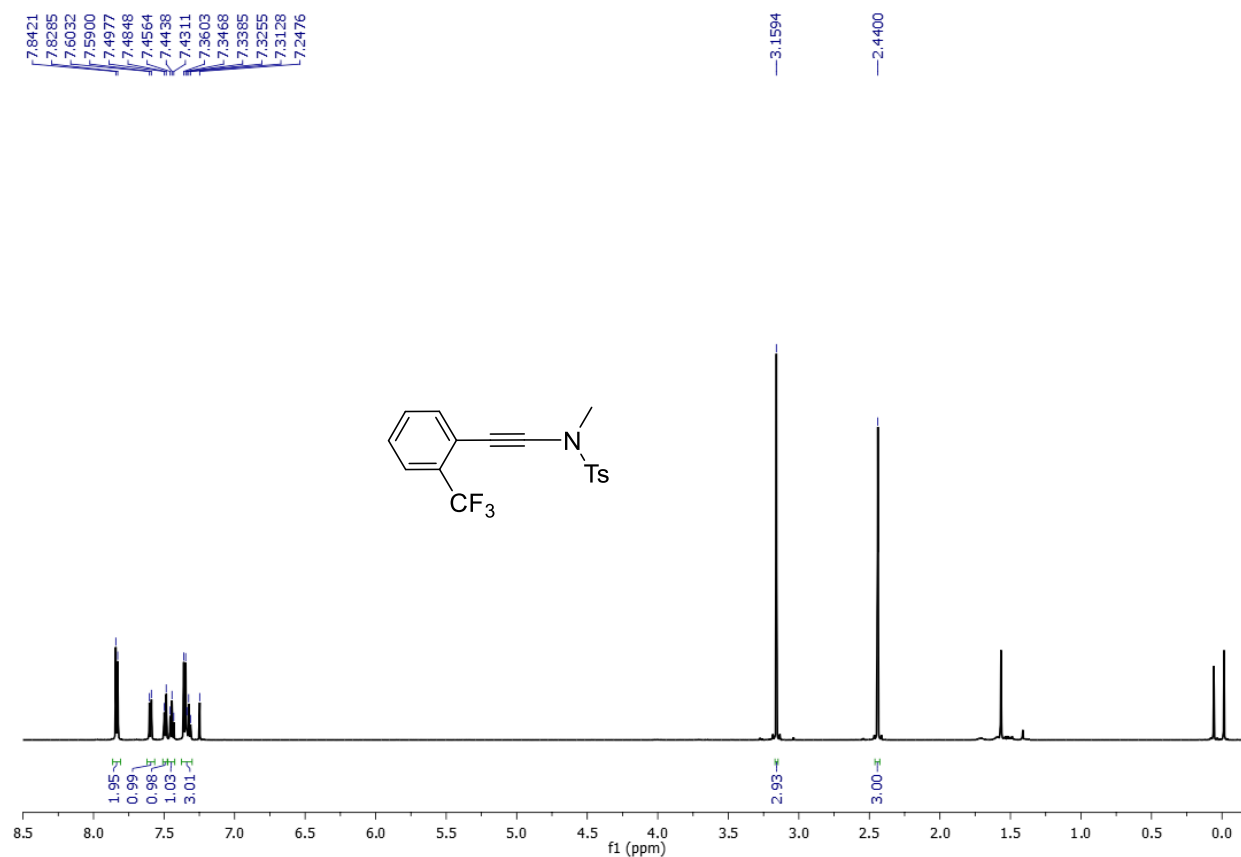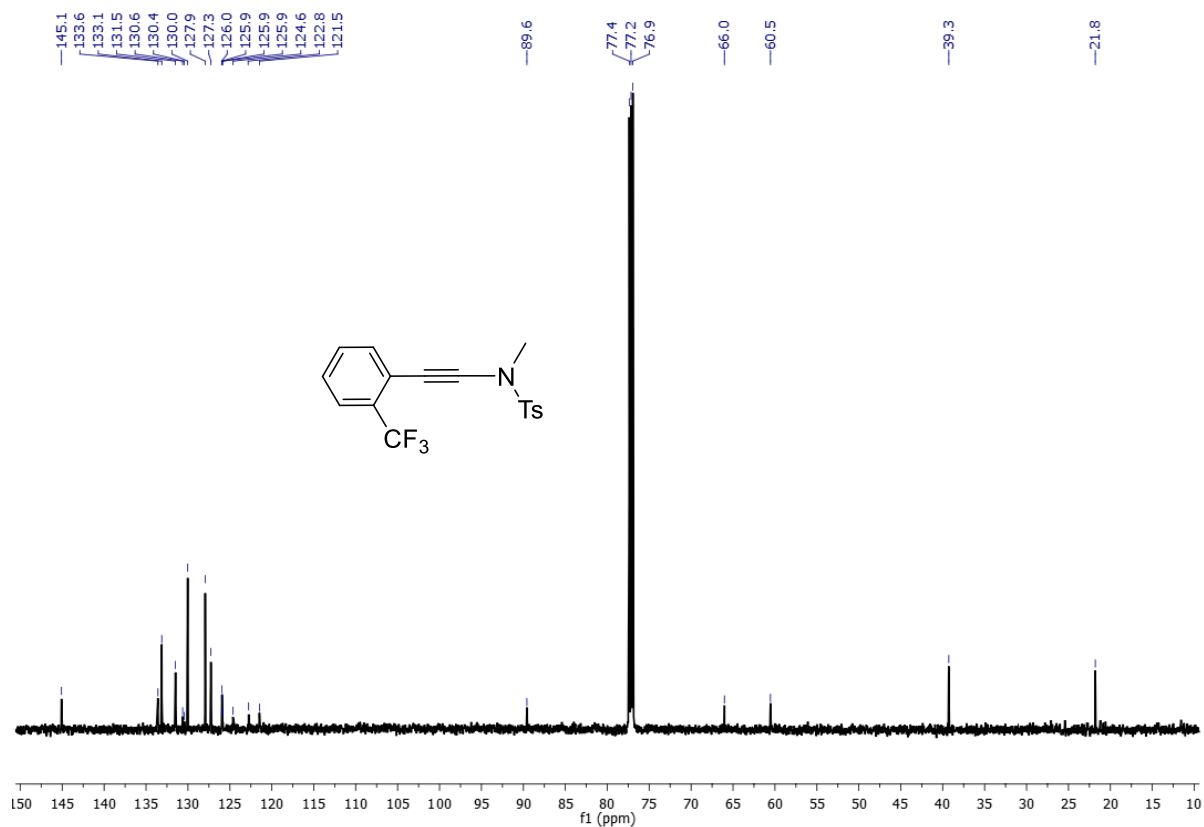



### 3-(2-oxooxazolidin-3-yl)prop-2-yn-1-yl benzoate (5ac):

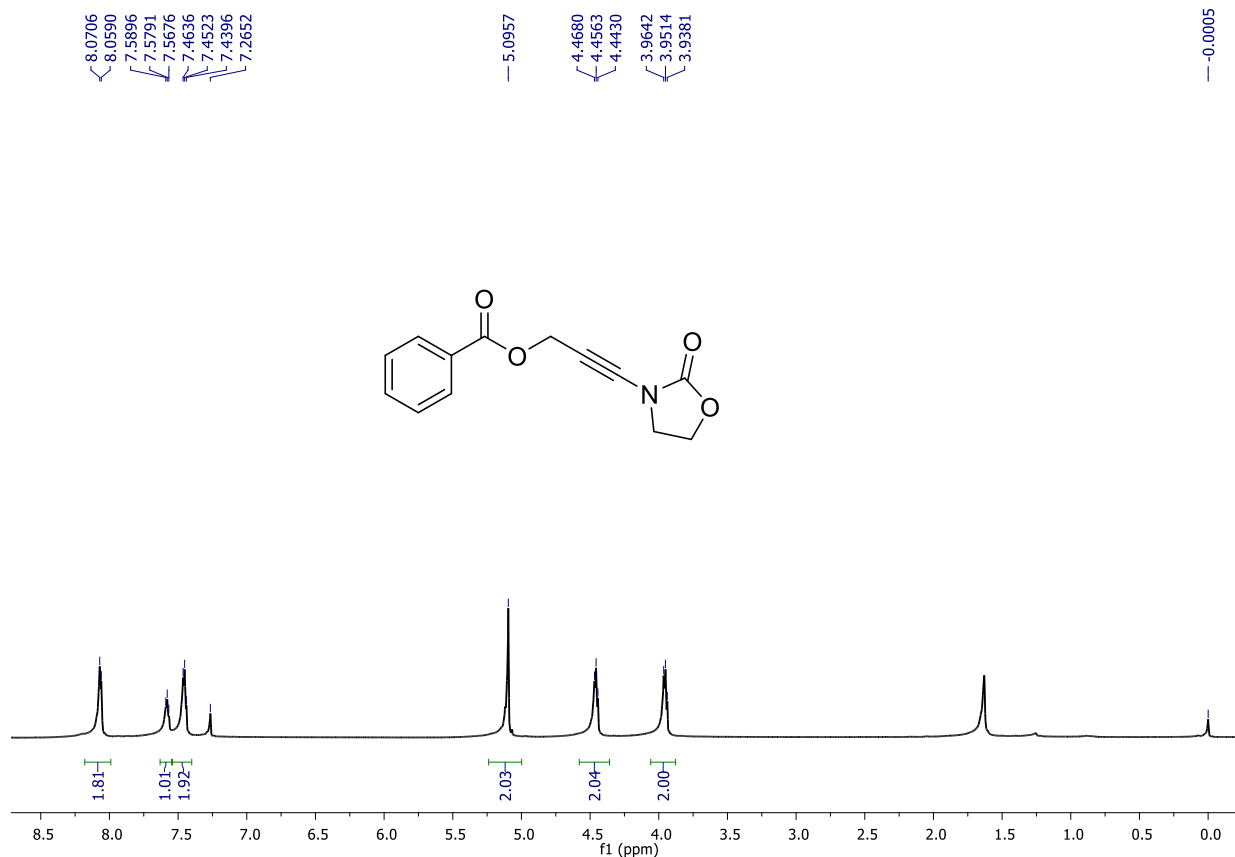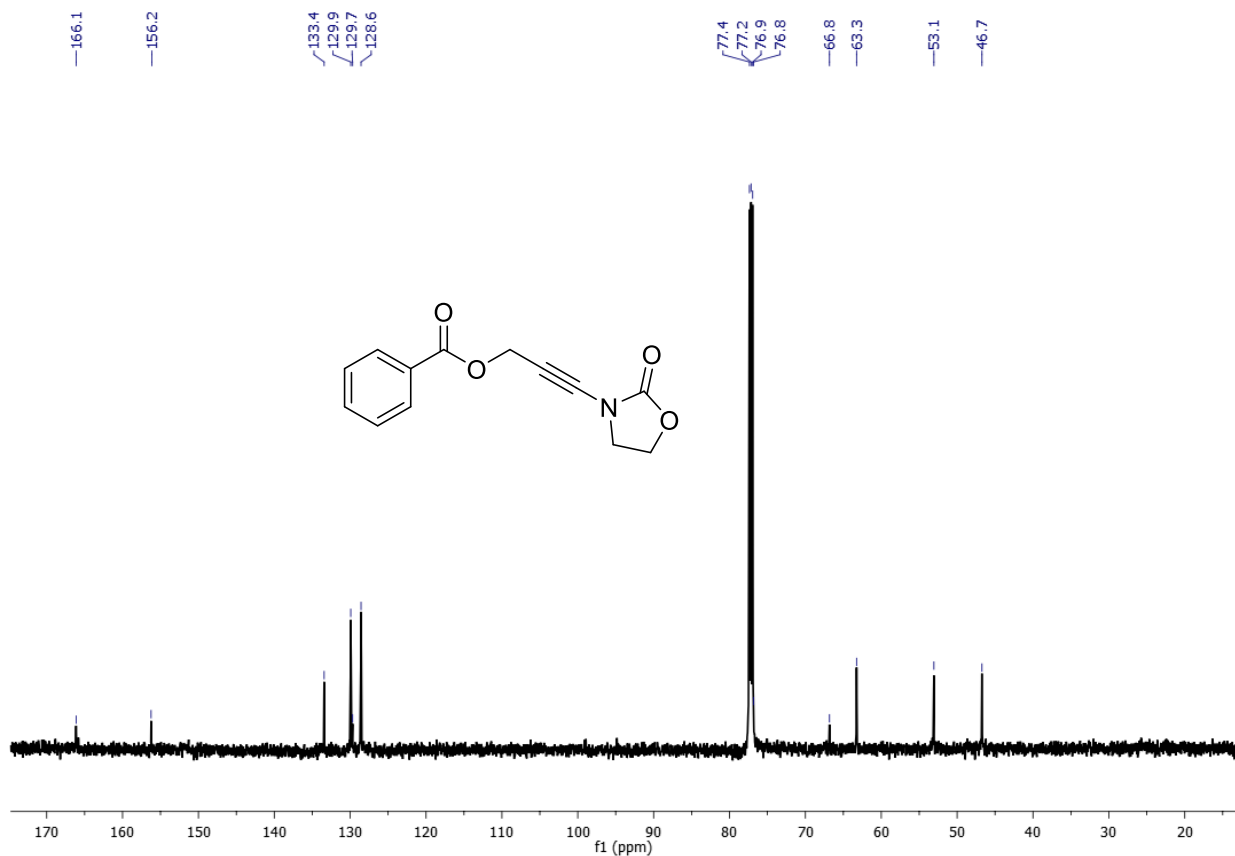

**3-(4-(3-chloromethyl)-2-oxooxazolidin-3-yl)prop-2-yn-1-yl benzoate (5ad):**

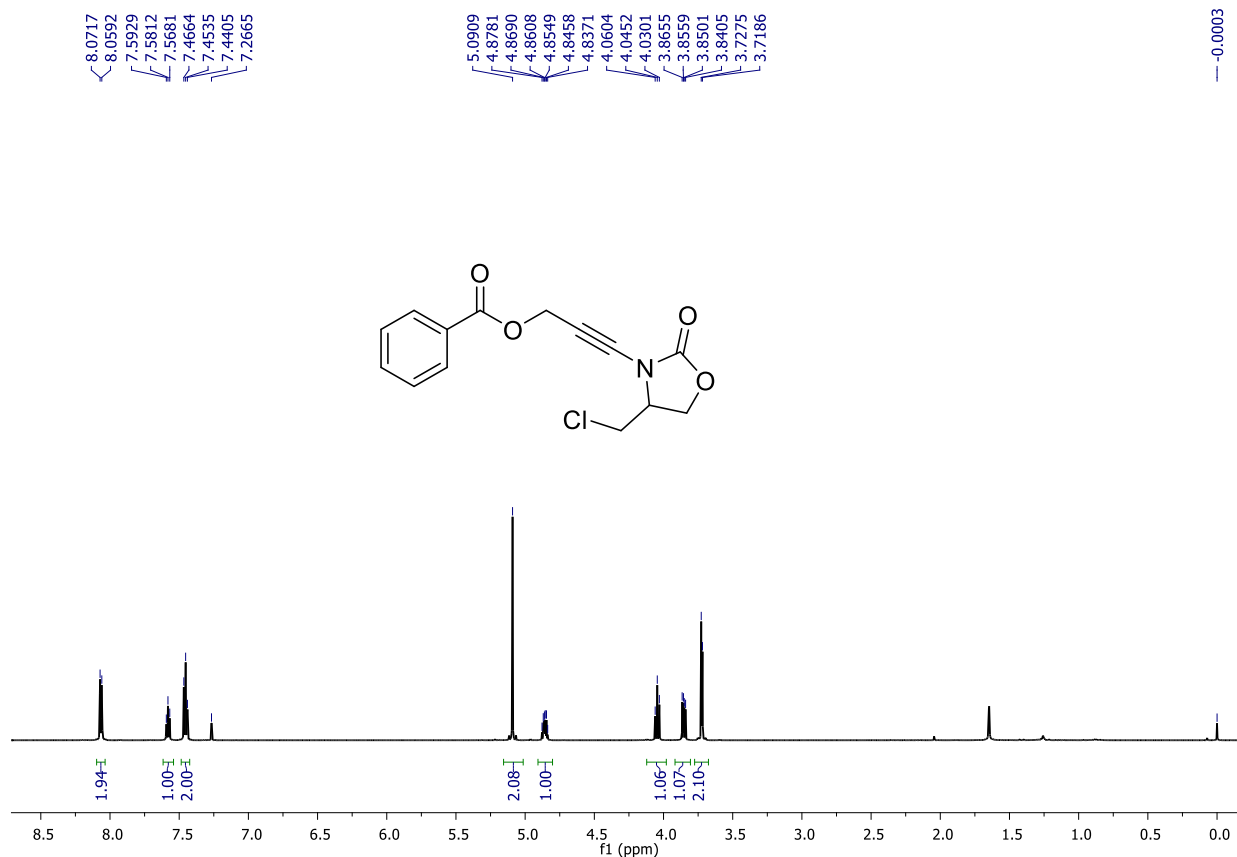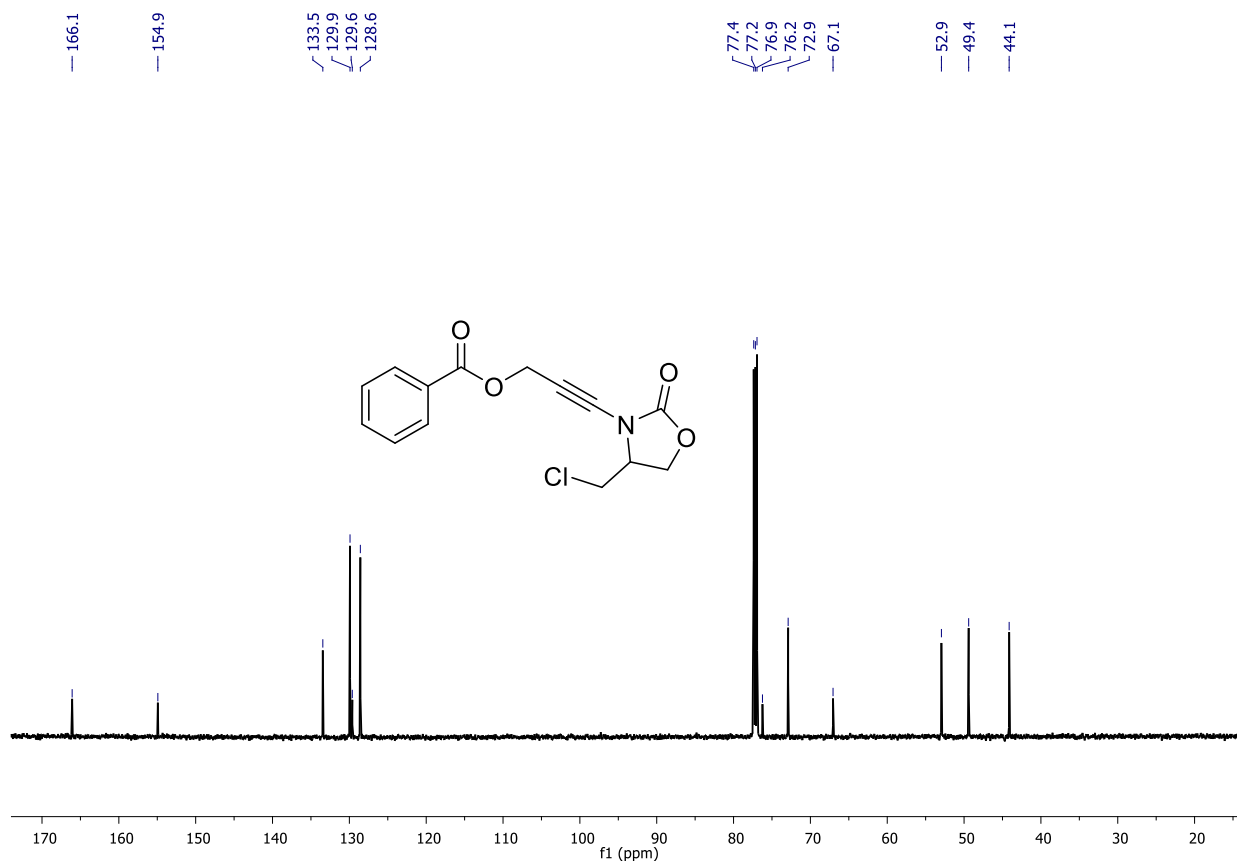

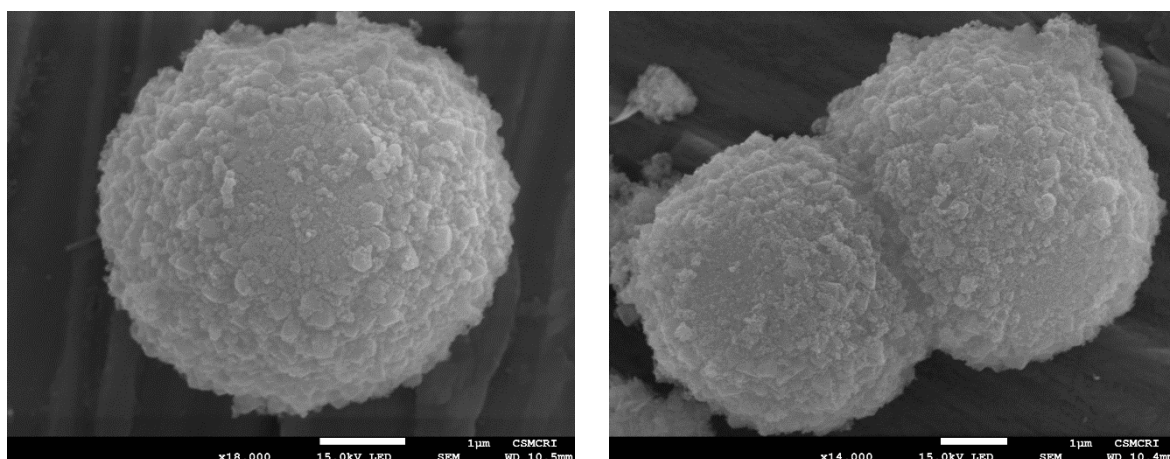

**Figure S1:** SEM images of the reused catalyst

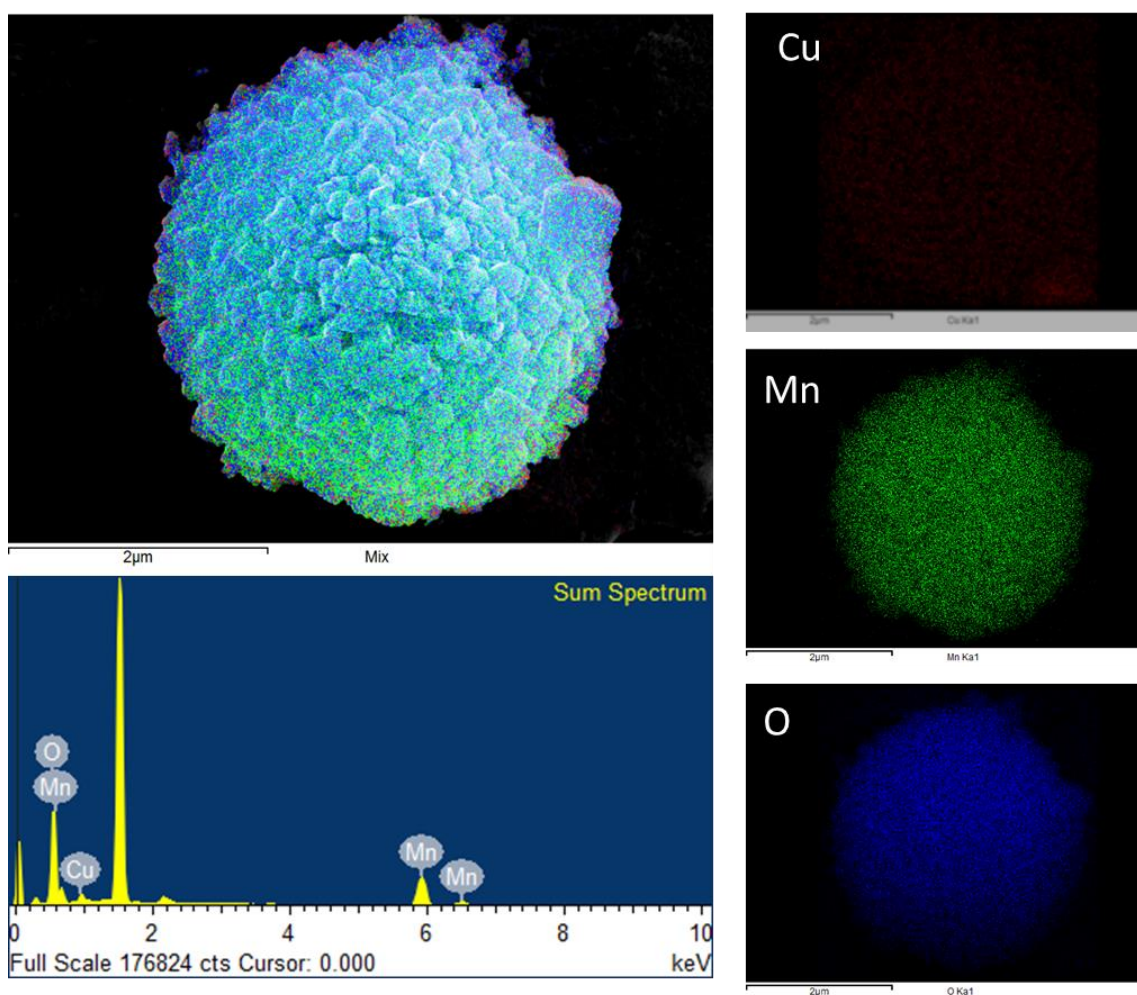

**Figure S2:** EDS-SEM images of the catalyst, to show the homogeneous distribution of Cu over manganese oxide sphere.

## 7. References

1. P. Pal, S. K. Pahari, A. K. Giri, S. Pal, H. C. Bajaj and A. B. Panda, *J. Mater. Chem. A*, 2013, **1**, 10251.
2. P. Pal, A. K. Giri, H. Singh, S. C. Ghosh and A. B. Panda, *Chem. Asian J.*, 2014, **9**, 2392.
3. P. Liu, J. Yang, P. Li and L. Wang, *Appl. Organometal. Chem.*, 2011, **25**, 830.
4. Y. Moglie, E. Mascaró, V. Gutierrez, F. Alonso and G. Radivoy, *J. Org. Chem.*, 2016, **81**, 1813.
5. Y. Wang, J. Gan, L. Liu, H. Yuan, Y. Gao, Y. Liu and Y. Zhao, *J. Org. Chem.*, 2014, **79**, 3678.
6. X. Li, S. Sun, F. Yang, J. Kang, Y. Wu and Y. Wu, *Org. Biomol. Chem.*, 2015, **13**, 2432.
7. V. Cavallaro, Y. F. Moglie, A. P. Murray and G. E. Radivoy, *Bioorg. Chem.*, 2018, 77 420–428.
8. Y. Zhang, Y. Zhang, J. Xiao, Z. Peng, W. Dong and D. An, *Eur. J. Org. Chem.*, **2015**, 7806.
9. X. Li, F. Yang, Y. Wu and Y. Wu, *Org. Lett.*, 2014, **16**, 992.
10. T. J. Kettles, N. Cockburn and W. Tam, *J. Org. Chem.*, 2011, **76**, 6951.
11. Jouvin, K.; Heimburger, J.; Evano, G. *Chem. Sci.*, **2012**, *3*, 756-760.
12. Y. Gao, G. Wang, L. Chen, P. Xu, Y. Zhao, Y. Zhou and L.-B. Han, *J. Am. Chem. Soc.*, 2009, **131**, 7956.
13. W. Jia and N. Jiao, *Org Lett.*, 2010, **12**, 2000.
14. K. Dooleweerd, H. Birkedal, T. Skrydstrup and T. Ruhland, *J. Org. Chem.*, 2008, **73**, 9447.
15. X. Jin, K. Yamaguchi, and N. Mizuno, *Chem. Commun.*, 2012, **48**, 4974.
16. A. Pinto, D. Kaiser, B. Maryasin, G. D. Mauro, L. Gonzalez and N. Maulide, *Chem. Eur. J.*, 2018, **24**, 2515.
17. B. Yao, Z. Liang, T. Niu and Y. Zhang, *J. Org. Chem.*, 2009, **74**, 4630.
18. W.-S. Wang, P. Chen and Y. Tang, *Tetrahedron*, 2017, *73*, 2731.
